# Supplementary material for: Transcriptome Analysis Reveals Genes Associated with Flooding Tolerance in Mulberry Plants
Source: MDPI journal article supplement (doi:10.3390/life13051087), 2023-04-26
Supplement: s1 [file s1]

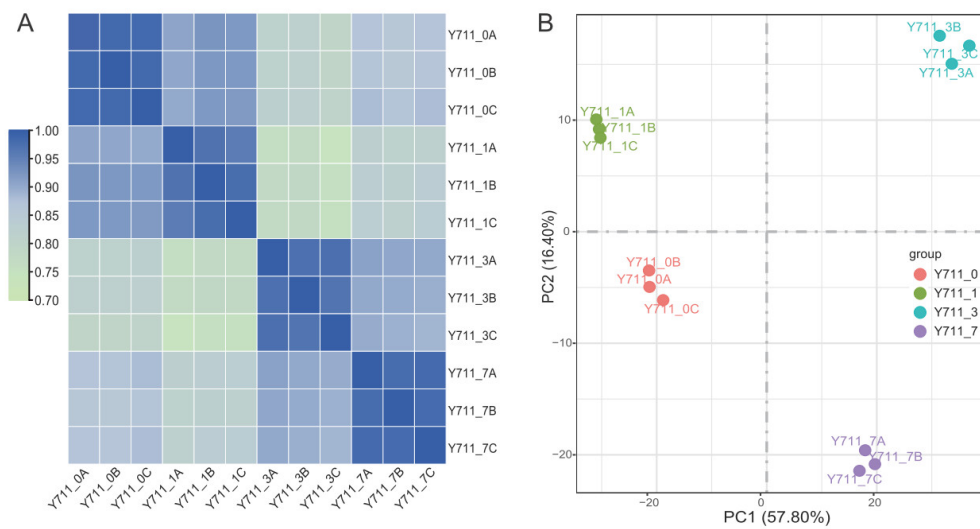

**Figure S1.** Pearson correlation coefficient and principal component analysis (PCA) of RNA-seq samples. **(A)** Pearson correlation coefficients of biological replicates. **(B)** PCA of individual biological replicates.

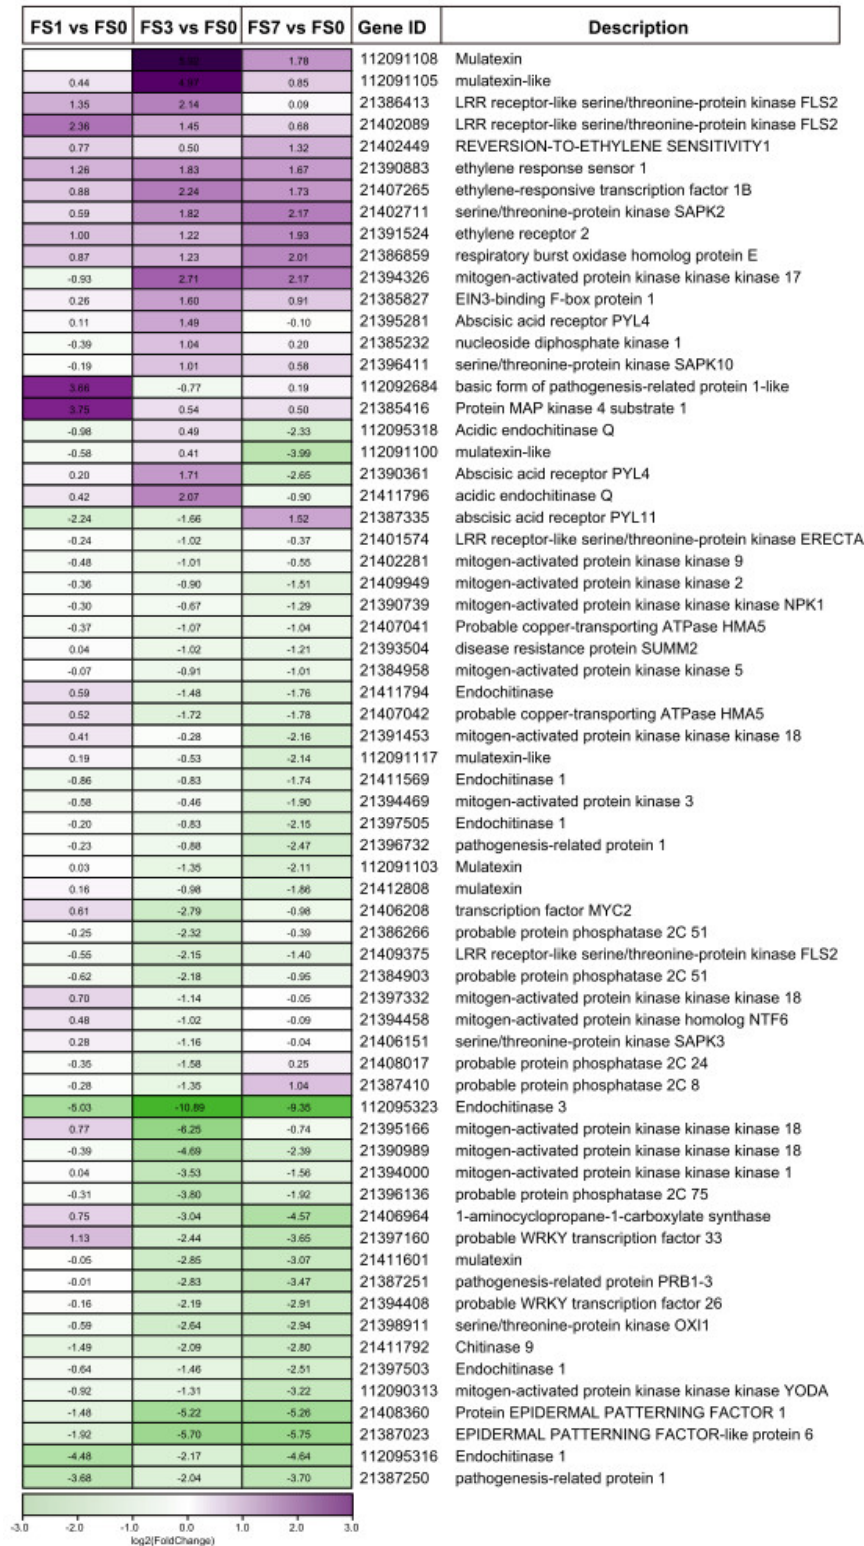

**Figure S2.** Heatmap of DEGs involved in MAPK signaling. The numbers in the heatmap indicate the Log2(fold change). FS0, FS1, FS3, and FS7 indicate 0 d, 1 d, 3 d, and 7 d after submergence, respectively.

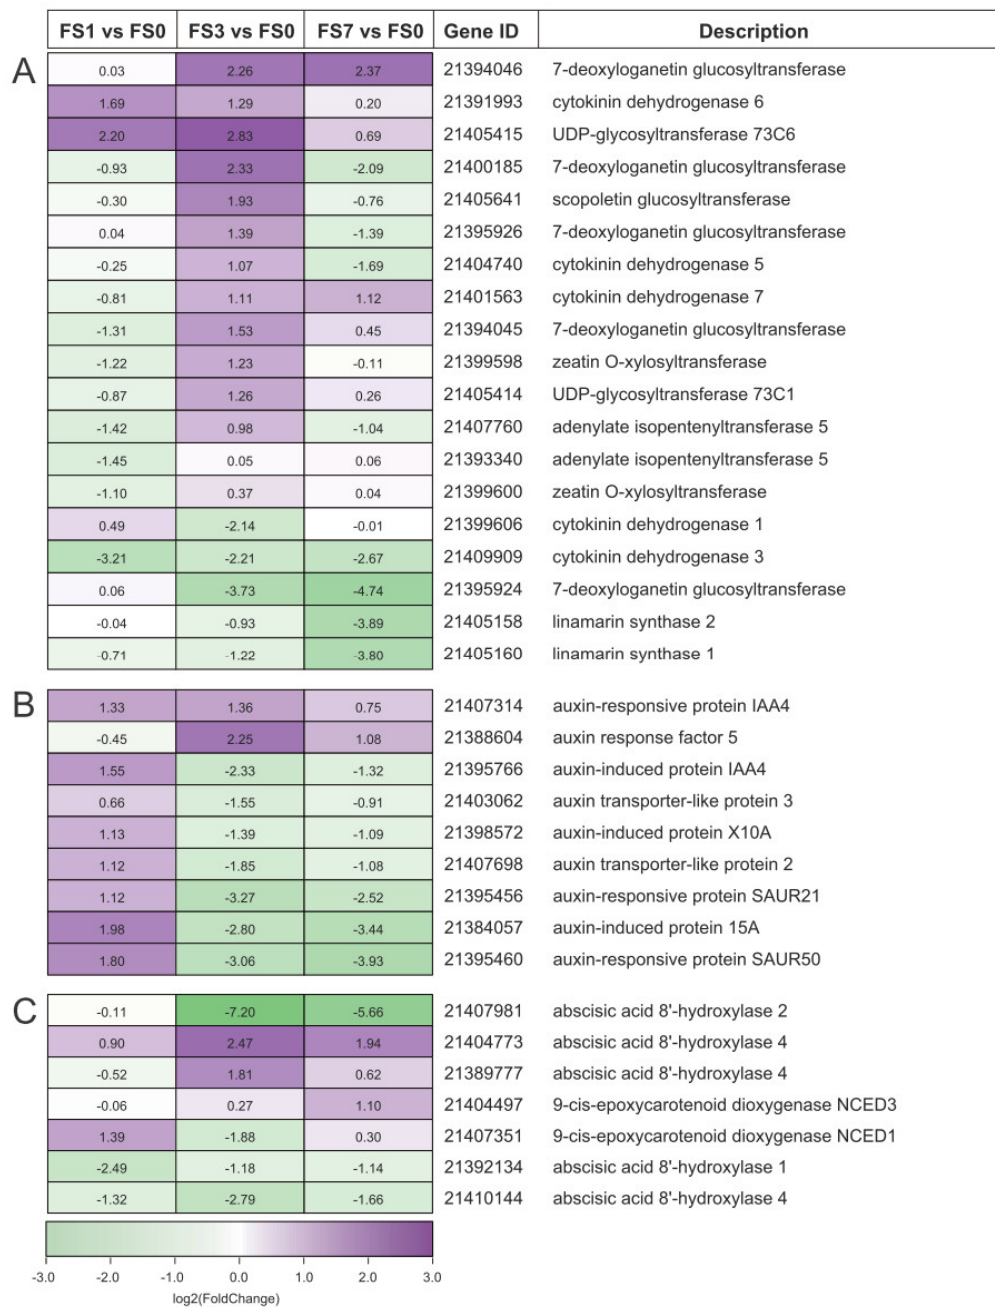

**Figure S3.** Heatmap of DEGs involved in zeatin (A), auxin (B), and ABA (C) signaling. The numbers in the heatmap indicate the Log2(fold change). FS0, FS1, FS3, and FS7 indicate 0 d, 1 d, 3 d, and 7 d after submergence, respectively.

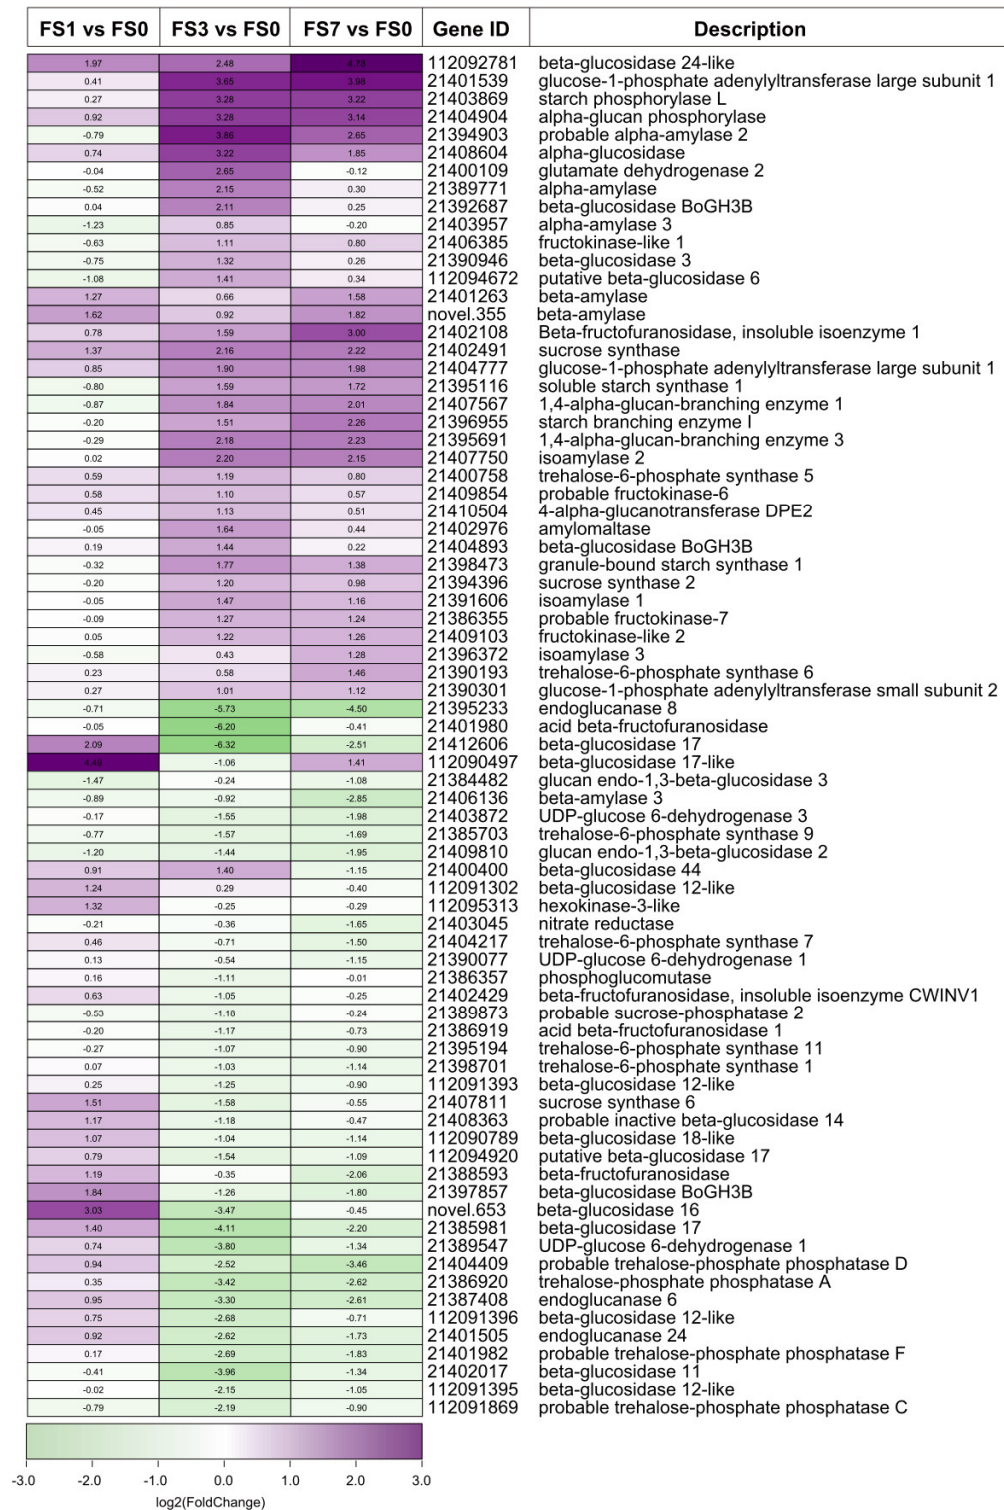

**Figure S4.** Heatmap of DEGs involved in starch and sucrose metabolism pathways. The numbers in the heatmap indicate the Log2(fold change). FS0, FS1, FS3, and FS7 indicate 0 d, 1 d, 3 d, and 7 d after submergence, respectively.



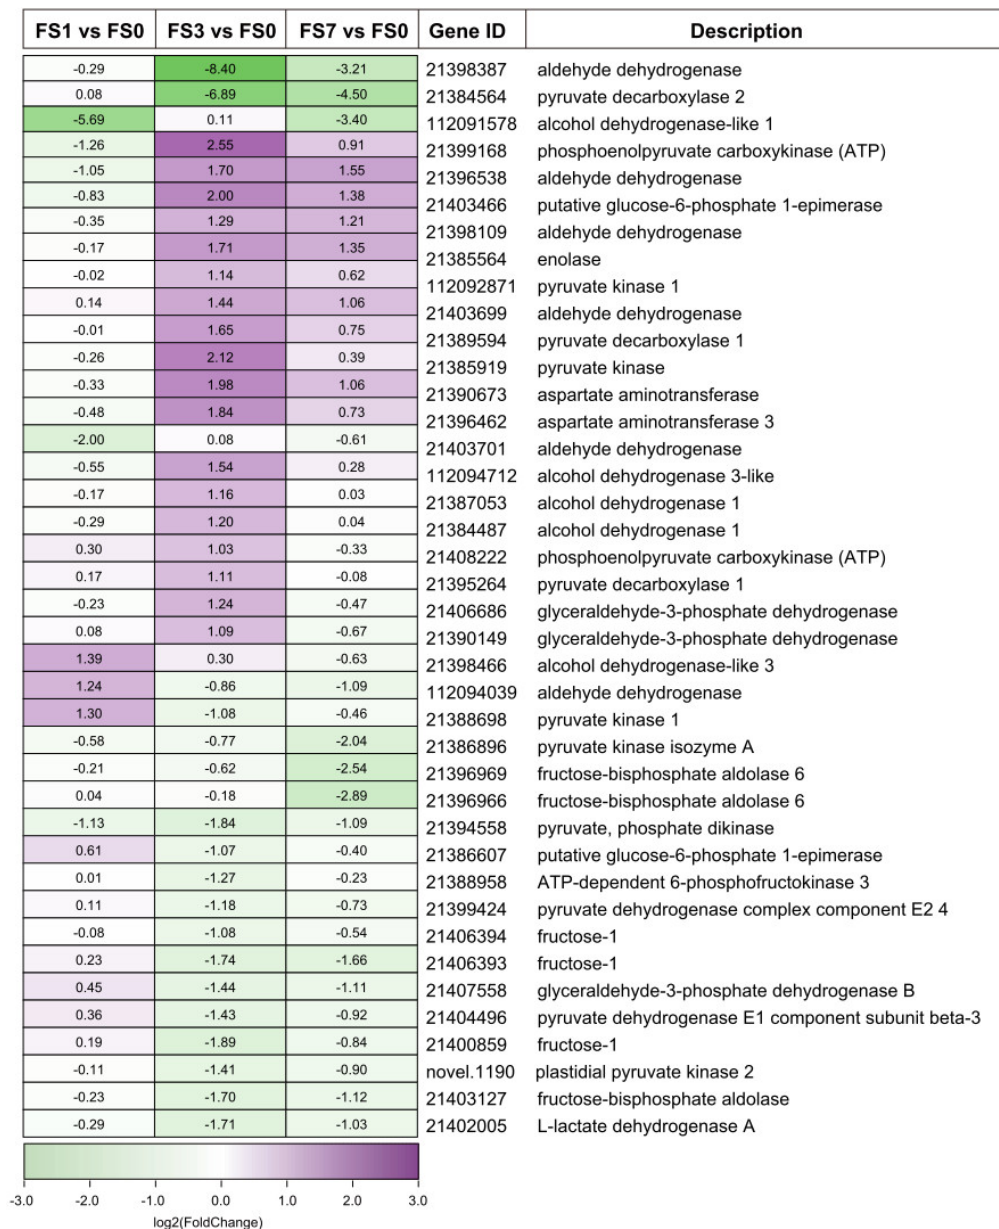

**Figure S5.** Heatmap of DEGs related to glycolysis/gluconeogenesis. The numbers in the heatmap indicate the Log<sub>2</sub>(fold change). FS0, FS1, FS3, and FS7 indicate 0 d, 1 d, 3 d, and 7 d after submergence, respectively.

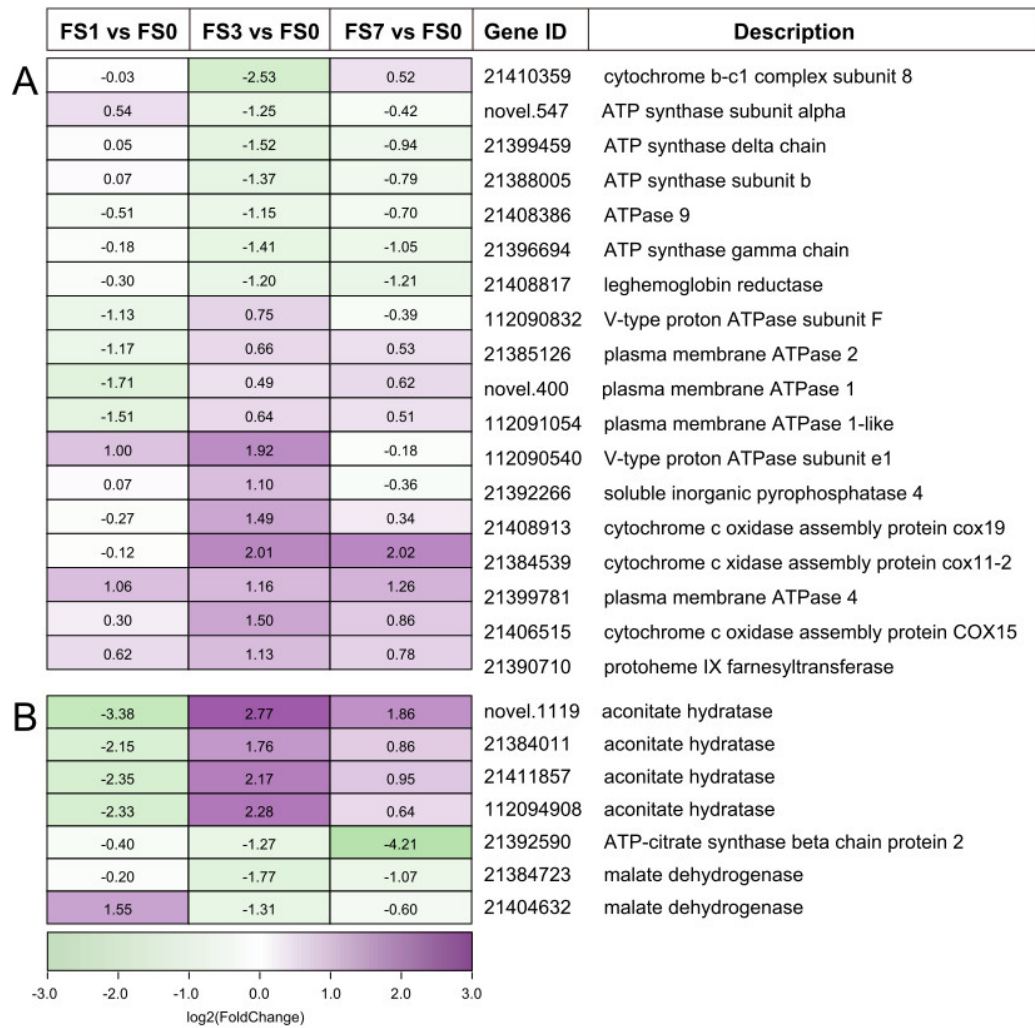

**Figure S6.** Expression profiles of DEGs related to oxidative phosphorylation (A) and the TCA cycle (B). The numbers in the heatmap indicate the Log2(fold change). FS0, FS1, FS3, and FS7 indicate 0 d, 1 d, 3 d, and 7 d after submergence, respectively.

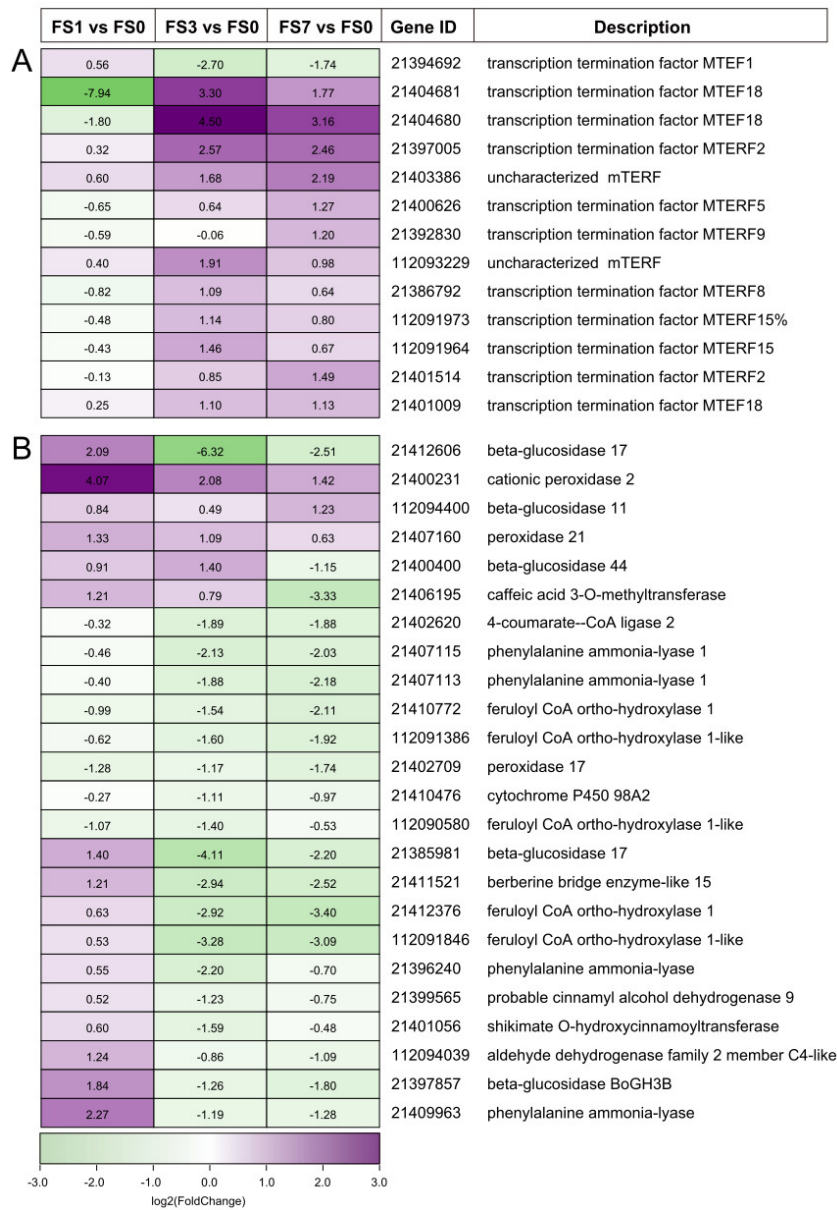

**Figure S7.** Expression profiles of DEGs related to mitochondrial function (A) and phenylpropanoid biosynthesis (B). The numbers in the heatmap indicate the Log2(fold change). FS0, FS1, FS3, and FS7 indicate 0 d, 1 d, 3 d, and 7 d after submergence, respectively.
