# Supplementary material for: Transcriptome Analysis Reveals Genes Associated with Flooding Tolerance in Mulberry Plants
Source: Life (Basel). 2023 Apr 26;13(5):1087. doi: 10.3390/life13051087 (PMC10222905; doi:10.3390/life13051087)
Supplement: Supplementary file 1 [file life-13-01087-s001.zip › life-2312327-supplementary/Supplementary material--Table s1-15.xlsx]

## Sheet: Table S1
Table S1 Primer sequences used for qRT-PCR
Target gene	Forward primer (5’-3’)	Reverse primer (5’-3’)
21407036	TGGTGAGGAGGAACCTGGAAG	AGGGCAGAAGTTGTTGGGTAATAA
21390585	GGCACCTTTCTGCTTCTCACTG	TCGTCGCCTTCATTAAAGTGTG
21386413	ATTTCCCCATTGTTCACTGTGATC	CGTCCACCTTTGTTGTGACTTTG
21391524	TCTGGGCTGCTACTGATTTCG	CCACGGCGATTAGGAAGTCA
21407265	AGGGCTGCTCTCCCGTCT	AAGTAATCCGCTCCCAAATCC
21402491	CGGGAGTGTGGGAGTACATTAGA	GGCAGCGAATGGCTCAAAG
21399781	CTGCCCTCACTGGAGAATCAC	CAACTTGGTTCGTGCTGTCG
21395233	AGGAAGTGTTGATGGGAAGAGC	AAGCAAGAACGACAGCGAGG
21403869	CTTGGGCATTGTCTATCGCTAC	AACACTAACATTGTAATCTGGGACG
HQ163775.1	CCACATGCCATCCTCCGTT	GTCCCTCACAATTTCCCGCT

## Sheet: Table S2
Table S2 Complete list of downregulated DEGs identified in the three comparison groups
gene_id	FS1	FS0	log2FoldChange	padj		gene_id	FS3	FS0	log2FoldChange	padj		gene_id	FS7	FS0	log2FoldChange	padj
21383803	110.754	376.992	-1.76649	2.07e-21		21383803	58.2462	390.688	-2.74929	4.8128e-39		21383803	55.795	396.734	-2.83037	8.89e-52
21383825	8.75669	27.2311	-1.6297	0.0118086		21383825	0.347072	28.2213	-6.32409	3.99939e-06		21383825	1.6094	28.6608	-4.15225	1.72e-06
21384006	3.81306	17.1772	-2.18542	0.0131735		21384006	1.6032	17.8001	-3.45295	0.00100475		21384006	0.971153	18.0773	-4.22271	0.000207425
21384121	46.9168	171.622	-1.86156	9.63e-09		21384121	8.97698	177.838	-4.28579	1.59961e-30		21384121	10.627	180.6	-4.08568	6.27e-35
21384212	146.51	319.803	-1.12835	1.01e-08		21384212	135.903	331.275	-1.28431	1.78754e-07		21384212	139.824	336.451	-1.26649	4.64e-11
21384214	626.304	1432.76	-1.19495	1.81e-09		21384214	326.003	1484.94	-2.18826	4.97181e-49		21384214	276.764	1507.89	-2.44563	1.6e-64
21384238	46.8408	268.073	-2.51502	7.33e-27		21384238	46.5176	277.859	-2.57896	1.52364e-27		21384238	7.10511	282.159	-5.31354	1.64e-47
21384380	1.62316	50.1632	-4.89248	3.55e-09		21384380	14.0684	51.994	-1.88559	1.04459e-05		21384380	7.10965	52.7975	-2.89463	5.3e-08
21384544	203.941	453.512	-1.1557	1.02e-05		21384544	49.1291	470.057	-3.26304	6.60686e-48		21384544	10.9324	477.309	-5.44725	1.83e-15
21384599	2.29031	27.1847	-3.53038	4.75e-05		21384599	1.96774	28.1839	-3.84222	3.28215e-06		21384599	2.25684	28.6183	-3.66459	4.4e-06
21384607	2.39217	26.6189	-3.47946	4.98e-05		21384607	2.71474	27.5671	-3.37621	4.26216e-05		21384607	9.0338	28.0018	-1.63196	0.00546138
21384662	2.47254	23.2863	-3.27019	0.000292488		21384662	0.347072	24.1364	-6.09904	1.23663e-05		21384662	0	24.5084	-7.10617	2.69e-07
21384692	95.3735	294.972	-1.63353	2.71e-12		21384692	22.1238	305.738	-3.79547	4.59163e-37		21384692	2.57834	310.471	-6.91128	6.91e-36
21384787	7.37598	33.4036	-2.16746	0.000366531		21384787	0.667713	34.6106	-5.72133	1.50428e-06		21384787	1.28727	35.1516	-4.76851	1.14e-07
21385090	3089.9	8087.67	-1.38845	1.23e-27		21385090	3148.92	8378.26	-1.41172	7.39053e-26		21385090	4008.3	8509.26	-1.08602	7.2e-31
21385302	21.8238	142.052	-2.69217	2.18e-16		21385302	4.94577	147.186	-4.90361	7.03523e-27		21385302	8.36323	149.487	-4.15696	2.33e-27
21385484	3.15215	35.6269	-3.52739	1.35e-06		21385484	0.988353	36.9092	-5.23082	1.71672e-07		21385484	2.5776	37.4843	-3.86146	3.59e-08
21385492	96.0232	245.838	-1.35652	1.49e-11		21385492	17.8627	254.688	-3.8257	1.5518e-42		21385492	98.6965	258.656	-1.39022	1.79e-13
21385656	56.5401	320.1	-2.4925	2.12e-16		21385656	32.6506	331.655	-3.33624	6.30765e-33		21385656	27.0959	336.804	-3.63636	4.87e-56
21385763	20.3657	57.5532	-1.50635	0.00157062		21385763	1.62066	59.6712	-5.19019	4.51691e-11		21385763	2.26233	60.5872	-4.7462	7.44e-12
21385782	49.1686	158.266	-1.6912	1.96e-07		21385782	55.147	164.072	-1.57008	1.82382e-06		21385782	45.4531	166.584	-1.87421	3.47e-11
21385791	18.8601	95.0315	-2.32528	3.08e-10		21385791	6.55747	98.4674	-3.90975	1.9708e-18		21385791	11.6151	100.007	-3.10627	3.45e-17
21385833	374.644	917.39	-1.29366	7.13e-16		21385833	180.668	950.794	-2.39635	1.76976e-39		21385833	71.8037	965.494	-3.74889	5.87e-23
21385834	62.4303	224.362	-1.84436	3.01e-13		21385834	77.3422	232.523	-1.58878	2.83146e-10		21385834	24.5008	236.107	-3.26876	1.3e-33
21385854	22.6933	48.2111	-1.09283	0.0202716		21385854	11.4638	49.9516	-2.12414	2.71089e-06		21385854	5.81024	50.7263	-3.12747	2.19e-09
21386070	49.9255	129.696	-1.37156	7.52e-05		21386070	16.1852	134.437	-3.0464	4.61644e-15		21386070	17.0663	136.509	-2.99895	1.17e-19
21386098	0	10.9583	-5.8654	0.000827947		21386098	0	11.3734	-5.97558	0.000285626		21386098	0.32298	11.5439	-5.05874	0.00174686
21386442	26.327	590.411	-4.4917	9.33e-86		21386442	1.26462	611.929	-8.86927	1.28896e-31		21386442	249.137	621.416	-1.31852	1.02e-12
21386582	7.22916	26.2464	-1.86785	0.00631269		21386582	0.948467	27.2043	-4.79968	6.77609e-06		21386582	4.51389	27.6266	-2.61341	0.00010644
21386722	28.2687	241.625	-3.08705	1.37e-28		21386722	5.16021	250.417	-5.58208	9.71342e-39		21386722	9.34737	254.303	-4.76541	6.95e-47
21386745	94.8811	360.064	-1.9188	3.37e-12		21386745	38.2058	373.126	-3.28035	4.51708e-39		21386745	27.0558	378.898	-3.80704	4.53e-57
21386948	17.819	94.1773	-2.40735	3.89e-11		21386948	4.14991	97.5833	-4.52764	2.89105e-17		21386948	1.61711	99.0967	-5.94163	3.57e-16
21387139	5658.76	13482.7	-1.25273	3.99e-24		21387139	5636.99	13968.7	-1.30916	9.95612e-23		21387139	5903.38	14186.9	-1.26494	2.86e-48
21387208	447.138	1363.11	-1.60983	5.51e-16		21387208	266.022	1412.57	-2.4072	2.53308e-63		21387208	451.019	1434.56	-1.66925	9.94e-41
21387245	5.96132	22.7136	-1.91256	0.0187927		21387245	3.84721	23.5468	-2.59685	0.000917702		21387245	2.89973	23.9134	-3.04255	0.000106046
21387250	29.0579	370.318	-3.67603	1.18e-55		21387250	93.3602	383.742	-2.03946	1.50528e-15		21387250	29.955	389.693	-3.70059	4.54e-63
21387279	30.3241	133.124	-2.12322	2.1e-09		21387279	18.7937	137.961	-2.86741	5.53627e-19		21387279	7.74273	140.104	-4.17812	9.72e-28
21387303	31.8781	69.2885	-1.12371	0.00516077		21387303	10.4889	71.8104	-2.77639	3.51208e-11		21387303	15.4784	72.9232	-2.23631	1.45e-09
21387470	16.1709	38.4485	-1.2551	0.037628		21387470	0.320641	39.8448	-6.82242	4.0111e-07		21387470	0	40.458	-7.82955	3.87e-09
21387643	1.0177	10.6912	-3.38952	0.0158354		21387643	1.99417	11.0713	-2.48604	0.0189759		21387643	0.320655	11.2447	-5.02009	0.00136217
21387721	9.27555	35.2384	-1.9096	0.00261679		21387721	4.80016	36.5143	-2.9086	7.03159e-06		21387721	4.82208	37.0781	-2.9409	9.9e-06
21387750	300.665	788.921	-1.3918	1.87e-24		21387750	169.936	817.251	-2.26702	1.52287e-32		21387750	109.991	830.03	-2.91595	2.51e-84
21387968	27.4126	81.4507	-1.57448	2.04e-05		21387968	16.1598	84.3779	-2.38953	2.67164e-10		21387968	37.3817	85.7024	-1.19621	0.000204742
21388025	0.633191	70.9448	-6.70844	8.71e-09		21388025	0	73.5087	-8.66723	1.08782e-11		21388025	0	74.6531	-8.71273	8.07e-12
21388202	124.665	757.597	-2.60527	8.32e-62		21388202	24.6376	785.056	-5.00976	5.63425e-93		21388202	120.595	797.295	-2.72481	1.91e-85
21388329	21.1527	82.8213	-1.9768	0.000111472		21388329	6.50909	85.8514	-3.7154	8.83539e-16		21388329	1.29033	87.1752	-6.07893	8.26e-14
21388786	1.70353	10.3564	-2.60522	0.044272		21388786	0	10.7381	-5.89211	0.000196825		21388786	0	10.9034	-5.93741	0.000152591
21388893	7.17994	56.3901	-2.97736	1.22e-08		21388893	1.91039	58.4488	-4.90115	2.60424e-11		21388893	1.60792	59.3565	-5.2026	1.78e-11
21389325	96.8356	277.263	-1.5128	1.81e-10		21389325	56.0516	287.32	-2.35503	2.49318e-23		21389325	35.4916	291.803	-3.03973	6.49e-39
21389470	15.0576	84.2059	-2.48776	1.29e-10		21389470	11.2489	87.2658	-2.96508	6.59058e-14		21389470	23.8456	88.6203	-1.89352	8.43e-09
21389489	45.7432	336.2	-2.86709	3.78e-27		21389489	15.4113	348.434	-4.48019	2.1299e-47		21389489	9.97189	353.841	-5.14623	1.27e-59
21389529	0	5.1748	-4.78241	0.0237142		21389529	0	5.35872	-4.88977	0.0102688		21389529	0	5.44219	-4.93533	0.00869518
21389769	89.9154	248.914	-1.46401	4.17e-11		21389769	44.5692	257.911	-2.53326	6.99311e-26		21389769	37.0771	261.933	-2.82038	4.22e-39
21389939	20.4154	56.5943	-1.46347	0.00366515		21389939	7.72486	58.6776	-2.91379	4.78895e-07		21389939	5.14432	59.579	-3.53133	2.21e-10
21390010	43.9629	153.996	-1.80567	4.41e-09		21390010	4.30898	159.636	-5.22635	1.37776e-26		21390010	6.7777	162.097	-4.5812	1.36e-29
21390060	23.8128	140.015	-2.54461	3.09e-16		21390060	6.39392	145.073	-4.49449	2.8502e-07		21390060	8.69233	147.336	-4.08137	9.55e-29
21390105	82.3909	217.137	-1.40303	4.23e-08		21390105	81.4312	224.973	-1.46536	1.42943e-13		21390105	91.5664	228.483	-1.31904	1.12e-12
21390113	6.00773	78.3594	-3.68553	1.53e-13		21390113	38.9079	81.2019	-1.06536	0.000937427		21390113	5.78574	82.4621	-3.83209	0.000156248
21390186	66.0157	168.983	-1.35959	5.95e-06		21390186	1.58526	175.133	-6.74432	7.13311e-21		21390186	19.0302	177.864	-3.22438	3.07e-27
21390200	79.7157	225.822	-1.5024	1.72e-09		21390200	21.6835	233.984	-3.42209	1.39808e-30		21390200	31.9277	237.647	-2.89576	6.24e-30
21390233	55.8939	136.973	-1.28807	7.53e-06		21390233	32.6981	141.901	-2.12604	8.65039e-09		21390233	35.1207	144.111	-2.03646	2.47e-14
21390771	28.886	70.0409	-1.2707	0.00142448		21390771	7.23415	72.5843	-3.33075	4.13632e-13		21390771	13.8719	73.7161	-2.40989	6.26e-10
21390866	139.547	658.908	-2.23622	1.23e-37		21390866	27.2521	682.781	-4.63783	8.94533e-98		21390866	29.9524	693.381	-4.53175	1.16e-113
21390909	1.41466	12.9676	-3.23256	0.00871773		21390909	0.952952	13.4279	-3.78386	0.00183615		21390909	3.21426	13.6389	-2.08284	0.0282381
21390993	0	40.1077	-7.7367	1.7e-08		21390993	0	41.5616	-7.84489	3.0261e-09		21390993	1.61025	42.2042	-4.71095	6.02e-09
21391022	7.15221	30.4452	-2.0904	0.00134945		21391022	7.3269	31.5538	-2.11906	0.000361089		21391022	4.51315	32.0433	-2.82762	1.65e-05
21391096	15.5536	76.5282	-2.30875	1.06e-07		21391096	29.5326	79.2486	-1.42493	0.00129823		21391096	28.3532	80.4945	-1.50481	1.81e-05
21391137	5.5194	41.5249	-2.92169	7.08e-06		21391137	2.63993	43.02	-4.03486	5.20103e-09		21391137	0.320655	43.6942	-6.97782	1.33e-07
21391138	35.0496	203.616	-2.52669	5.6e-18		21391138	10.7697	210.967	-4.28858	4.79084e-38		21391138	9.34209	214.244	-4.51847	9.57e-41
21391190	1.72503	27.8632	-4.02827	1.56e-05		21391190	6.39392	28.8858	-2.16278	0.00563787		21391190	9.3422	29.333	-1.64994	0.00528351
21391338	12.8199	42.3698	-1.73573	0.00143628		21391338	11.6448	43.9212	-1.92557	0.000211417		21391338	5.16048	44.5975	-3.11203	2.21e-08
21391353	20.3053	103.273	-2.34283	3.33e-10		21391353	7.63408	107.066	-3.82314	1.5988e-17		21391353	7.08526	108.719	-3.93845	1.01e-19
21391616	29.9731	479.249	-3.99969	7.48e-58		21391616	16.6699	496.82	-4.91433	8.22423e-59		21391616	224.471	504.481	-1.16822	0.00384159
21391647	288.139	1796.03	-2.63977	4.44e-101		21391647	18.7643	1861.39	-6.63872	1.54724e-179		21391647	42.5303	1890.28	-5.47315	6.73e-238
21391694	73.9688	185.842	-1.33143	2.83e-06		21391694	22.7816	192.64	-3.07531	6.53136e-25		21391694	10.3202	195.619	-4.24478	6.28e-36
21392211	11.6969	94.8804	-3.02909	1.66e-13		21392211	0.316156	98.3252	-8.12513	1.50673e-10		21392211	1.61257	99.851	-5.95271	2.73e-16
21392227	49.5156	143.37	-1.53147	2.22e-08		21392227	68.1542	148.549	-1.12414	3.94052e-06		21392227	44.1827	150.873	-1.77153	2.07e-12
21392259	44.1263	227.42	-2.35635	2.79e-16		21392259	4.83556	235.691	-5.58738	1.13765e-37		21392259	10.9461	239.352	-4.44886	4.96e-44
21392372	460.351	1057.32	-1.20119	2.7e-11		21392372	282.814	1095.72	-1.95501	2.36787e-19		21392372	285.594	1112.75	-1.96194	1.59e-59
21392376	6.023	78.0883	-3.67887	7.39e-14		21392376	17.3984	80.8977	-2.21889	1.31847e-08		21392376	19.6822	82.1603	-2.06203	2.81e-09
21392622	29.3202	74.552	-1.33577	0.0118186		21392622	7.76522	77.2419	-3.30267	1.34082e-13		21392622	11.9463	78.4477	-2.71607	2.25e-10
21392770	13.345	37.5412	-1.4959	0.00442448		21392770	10.7782	38.8981	-1.85024	0.000227969		21392770	7.08537	39.5014	-2.47838	1.9e-05
21392842	128.611	393.223	-1.61092	0.00380718		21392842	20.0803	407.552	-4.3325	9.45441e-61		21392842	24.1615	413.855	-4.09758	3.35e-69
21392851	5.54151	31.2359	-2.50517	0.00174896		21392851	5.88126	32.361	-2.45758	0.000178814		21392851	14.4988	32.8734	-1.17929	0.0368892
21392963	21.7789	44.0376	-1.01587	0.03031		21392963	11.5825	45.6218	-1.98495	9.38115e-05		21392963	7.40126	46.3322	-2.64467	3.54e-07
21393018	17.645	112.457	-2.68366	1.7e-12		21393018	12.8786	116.519	-3.18562	8.22224e-20		21393018	31.2801	118.336	-1.91954	2.44e-11
21393569	14.3425	44.9718	-1.63761	0.00231915		21393569	0.347072	46.6234	-7.04873	1.04674e-07		21393569	0.323718	47.3414	-7.09404	7.82e-08
21393603	16.9619	163.799	-3.25242	5.48e-22		21393603	3.32511	169.743	-5.69402	1.43098e-27		21393603	8.05113	172.375	-4.41896	5.75e-33
21393606	37.8881	104.382	-1.46349	2.75e-06		21393606	36.0461	108.171	-1.58064	4.25481e-07		21393606	15.1448	109.856	-2.85795	1.3e-16
21393615	32.5632	220.053	-2.74701	9.03e-24		21393615	6.46472	228.075	-5.1258	3.05538e-37		21393615	7.09444	231.6	-5.02912	5.9e-42
21393666	55.941	247.317	-2.13893	1.16e-18		21393666	72.6711	256.292	-1.82106	1.04601e-18		21393666	45.4411	260.265	-2.5177	1.99e-32
21393860	29.8704	250.895	-3.06127	2.22e-24		21393860	10.5927	259.995	-4.59685	3.53975e-39		21393860	8.37168	264.046	-4.97726	9.48e-48
21394075	4.8183	21.7221	-2.18006	0.00761497		21394075	5.78104	22.5092	-1.98182	0.0164733		21394075	2.26159	22.8603	-3.33911	0.000106004
21394123	33.5174	154.204	-2.20972	1.04e-10		21394123	17.7924	159.84	-3.15881	1.2468e-18		21394123	5.15129	162.298	-4.97615	7.02e-29
21394224	6.10337	25.382	-2.05251	0.00635518		21394224	0.316156	26.2967	-6.22155	1.12075e-05		21394224	0.320655	26.7132	-6.26725	7.91e-06
21394263	1.38071	60.698	-5.47625	9.91e-10		21394263	24.2861	62.9375	-1.38046	0.00492339		21394263	3.23264	63.8975	-4.30829	7.09e-12
21394308	20.534	105.34	-2.36273	2.37e-11		21394308	0	109.181	-9.2378	2.75551e-13		21394308	1.61257	110.878	-6.10358	4.99e-17
21394395	74.1722	232.679	-1.64696	3.57e-12		21394395	35.8127	241.168	-2.74776	2.85714e-24		21394395	15.4932	244.914	-3.98346	6.61e-40
21394511	13.9595	40.5036	-1.53689	0.00311137		21394511	19.5976	41.9809	-1.0976	0.0155797		21394511	14.8455	42.6327	-1.52235	0.000970033
21394558	5978.75	13127.1	-1.13481	3.15e-16		21394558	3803.96	13600.6	-1.83814	9.53843e-22		21394558	6490.94	13812.7	-1.08949	6.19e-30
21394584	24.9975	69.9121	-1.4795	0.000104147		21394584	10.5947	72.4431	-2.78344	3.65852e-11		21394584	13.5453	73.5666	-2.44171	1.23e-10
21394697	29.7803	100.941	-1.75245	1.9e-06		21394697	6.86962	104.633	-3.92824	8.16152e-19		21394697	9.02535	106.247	-3.55722	1.73e-19
21394768	14.0848	97.5597	-2.77987	4.22e-13		21394768	1.30002	101.098	-6.27103	6.53076e-15		21394768	5.15889	102.672	-4.31464	9.34e-21
21394872	29.2843	76.7867	-1.38024	0.000961977		21394872	12.6272	79.5669	-2.64633	2.58253e-11		21394872	16.422	80.8053	-2.29774	4.44e-10
21394959	55.8128	214.001	-1.93551	8.74e-16		21394959	22.8479	221.747	-3.27607	1.83062e-35		21394959	14.4886	225.189	-3.95677	1.26e-39
21395000	102.847	595.153	-2.53155	2.22e-31		21395000	3.70758	616.849	-7.41589	1.45668e-51		21395000	17.3898	626.461	-5.17041	9.2e-23
21395074	549.355	1392.83	-1.34377	2.18e-21		21395074	489.279	1443.34	-1.56154	3.94185e-20		21395074	437.915	1465.75	-1.74301	1.6e-72
21395293	40.0908	321.932	-3.00085	1.82e-07		21395293	13.5752	333.583	-4.60489	2.66297e-55		21395293	10.6155	338.769	-4.99327	7.8e-60
21395353	92.2261	727.181	-2.9841	1.09e-76		21395353	61.2491	753.557	-3.62192	2.2171e-16		21395353	26.117	765.267	-4.87287	5.44e-133
21395366	65.0743	171.476	-1.39115	0.000181576		21395366	18.0812	177.701	-3.28582	7.31574e-23		21395366	12.5571	180.469	-3.84352	1.82e-32
21395383	58.8604	515.814	-3.12335	5.63e-54		21395383	11.1262	534.513	-5.5859	1.28442e-17		21395383	127.13	542.811	-2.09461	8.43e-41
21395401	5.52282	18.7431	-1.7725	0.0390185		21395401	1.58078	19.4384	-3.58854	0.000768881		21395401	3.54104	19.7353	-2.47773	0.00209895
21395789	11.8409	32.7697	-1.46462	0.0138546		21395789	1.59423	33.959	-4.38172	2.9251e-07		21395789	0.96429	34.4898	-5.15612	3.51e-07
21395928	375.231	1830.35	-2.28778	2.46e-70		21395928	700.036	1896.96	-1.43819	2.6756e-28		21395928	102.56	1926.39	-4.23154	6.72e-223
21395929	409.923	2018.6	-2.30082	6.88e-65		21395929	510.963	2091.88	-2.033	1.02083e-33		21395929	61.946	2124.43	-5.10047	1.09e-266
21395943	113.362	273.445	-1.27394	1.43e-06		21395943	24.492	283.446	-3.5414	1.69903e-35		21395943	5.79102	287.821	-5.63256	3.68e-45
21395982	12.0197	42.1158	-1.81448	0.000836246		21395982	0.694144	43.6566	-6.05216	2.55788e-07		21395982	0	44.3332	-7.96081	1.43e-09
21395996	6.81693	108.901	-3.99922	4.46e-20		21395996	40.2284	112.829	-1.48705	3.889e-08		21395996	37.7546	114.59	-1.60209	2.53e-08
21396058	14.9653	67.4801	-2.17211	6.78e-07		21396058	23.4847	69.91	-1.571	1.28957e-05		21396058	19.0394	71.0056	-1.89909	2.79e-07
21396071	0	483.352	-11.3275	9.21e-20		21396071	0	500.852	-11.4356	9.21273e-21		21396071	0	508.645	-11.4811	5.85e-21
21396082	48.2838	102.148	-1.08115	0.00407642		21396082	5.17366	105.93	-4.34342	6.72813e-17		21396082	11.2721	107.551	-3.25351	2.25e-15
21396090	28.7724	69.5865	-1.27756	0.00196782		21396090	3.41786	72.1215	-4.44619	5.30534e-13		21396090	0.967352	73.2372	-6.24261	2.21e-11
21396137	218.4	491.119	-1.16738	3.23e-11		21396137	25.5497	508.913	-4.31643	5.24621e-81		21396137	44.1783	516.848	-3.54825	7.85e-83
21396165	189.941	448.048	-1.23494	2.13e-12		21396165	139.283	464.29	-1.73511	9.92171e-27		21396165	130.933	471.511	-1.84853	3.16e-35
21396296	1021.03	2662.86	-1.3827	2.38e-48		21396296	20.8338	2759.04	-7.06145	8.41671e-243		21396296	677.661	2802.06	-2.0479	1.37e-78
21396363	21.8807	96.2232	-2.14001	2.08e-10		21396363	40.0798	99.7079	-1.3169	3.37753e-06		21396363	39.0031	101.26	-1.37616	9.14e-07
21396369	14.6086	36.5714	-1.32324	0.0178918		21396369	6.48266	37.9058	-2.5394	5.03787e-06		21396369	6.45166	38.4917	-2.5774	3.18e-06
21396384	90.9406	262.15	-1.52122	2.04e-07		21396384	27.9029	271.676	-3.27573	2.80068e-37		21396384	18.0275	275.901	-3.93418	3.88e-46
21396399	128.967	259.588	-1.01287	1.14e-05		21396399	18.5514	269.043	-3.85368	2.07142e-32		21396399	14.4963	273.206	-4.23536	5.32e-49
21396435	124.991	1165.34	-3.21776	2.28e-107		21396435	48.7495	1207.3	-4.63052	2.136e-06		21396435	279.132	1226.18	-2.13533	6.65e-51
21396439	52.2283	205.416	-1.96902	1.4e-10		21396439	12.2044	212.907	-4.10845	2.29294e-27		21396439	8.70385	216.193	-4.63452	6.82e-40
21396500	1374.53	2870.23	-1.06221	3.03e-21		21396500	344.448	2973.55	-3.11008	1.48445e-17		21396500	1420.95	3020.1	-1.08765	8.64e-31
21396503	764.567	2132.46	-1.47967	9.9e-35		21396503	195.983	2209.46	-3.49509	1.07902e-70		21396503	938.7	2244.02	-1.25727	7e-29
21396518	17.1581	113.514	-2.73274	2.03e-14		21396518	18.4162	117.649	-2.66762	3.90118e-11		21396518	15.4501	119.464	-2.94983	2.71e-16
21396560	32.1295	117.211	-1.85865	1.53e-07		21396560	9.68859	121.49	-3.63511	1.80152e-20		21396560	6.43697	123.371	-4.25847	1.07e-23
21396768	36.8877	182.285	-2.31294	6.26e-16		21396768	23.2777	188.943	-3.01175	4.56824e-22		21396768	78.3069	191.867	-1.2927	6.04e-08
21396849	32.6422	179.851	-2.44953	7.66e-15		21396849	6.84719	186.351	-4.76138	1.37194e-34		21396849	5.80876	189.255	-5.02691	9.34e-36
21396905	35.6753	88.6832	-1.31826	0.000106054		21396905	0.632311	91.9198	-7.13529	1.63588e-10		21396905	34.7908	93.3408	-1.42348	7.61e-06
21396907	11.2909	124.504	-3.46821	1.49e-19		21396907	7.32941	129.039	-4.1133	1.22729e-18		21396907	29.96	131.029	-2.12859	4.8e-12
21396920	65.7073	171.573	-1.38722	2.4e-08		21396920	50.7812	177.778	-1.80419	1.45285e-12		21396920	51.8828	180.556	-1.79846	6.6e-14
21396956	3.82552	20.0882	-2.40993	0.00399463		21396956	0.632311	20.812	-4.99679	8.85517e-05		21396956	2.89435	21.1366	-2.86604	0.000365843
21397049	23.0667	100.382	-2.11929	2.54e-10		21397049	10.0446	104.037	-3.3626	6.91202e-18		21397049	9.34442	105.649	-3.49841	6.01e-20
21397131	1.0177	10.0092	-3.29535	0.0241553		21397131	1.30002	10.3711	-2.99	0.012942		21397131	0.645959	10.5305	-4.02972	0.00656825
21397358	9.00683	48.5441	-2.44374	4.63e-06		21397358	14.0858	50.3216	-1.8375	2.97285e-05		21397358	1.92626	51.0982	-4.72436	2.24e-10
21397425	4.99908	65.7917	-3.69616	7.9e-12		21397425	12.4302	68.1714	-2.45442	1.50739e-09		21397425	1.93862	69.2341	-5.16085	2.15e-13
21397438	1.02393	18.1372	-4.15	0.000492369		21397438	0	18.8011	-6.70008	2.91871e-06		21397438	2.25695	19.0921	-3.08044	0.000409971
21397454	44.1529	193.192	-2.13879	4.62e-11		21397454	26.6138	200.225	-2.9208	6.18718e-18		21397454	13.54	203.322	-3.90848	2.82e-37
21397542	10.454	41.4195	-1.98015	0.00021879		21397542	3.26328	42.9114	-3.71386	1.03089e-08		21397542	4.18922	43.5776	-3.37858	2.15e-08
21397950	300.969	1083.37	-1.8484	7.94e-06		21397950	245.701	1122.93	-2.19334	2.84632e-41		21397950	121.422	1140.25	-3.2311	8.21e-24
21397952	163.09	554.808	-1.76862	1.11e-12		21397952	215.028	574.913	-1.42031	5.96904e-17		21397952	177.566	583.828	-1.71709	6.9e-27
21398076	104.928	243.033	-1.20913	3.02e-06		21398076	52.2572	251.892	-2.2747	3.77829e-19		21398076	55.1294	255.786	-2.21414	1.23e-23
21398272	220.14	2632.19	-3.57768	2.67e-230		21398272	0	2727.58	-13.8808	2.17971e-30		21398272	44.775	2769.98	-5.94988	0
21398300	129.484	302.7	-1.22787	1.08e-10		21398300	68.9591	313.619	-2.18173	1.41464e-22		21398300	151.639	318.512	-1.07086	9.74e-09
21398411	16.5726	35.2962	-1.08721	0.0423575		21398411	0.694144	36.5781	-5.79672	9.83694e-07		21398411	11.2937	37.1456	-1.7183	0.000496858
21398413	1.61693	24.6382	-3.87456	6.11e-05		21398413	1.94131	25.5306	-3.70401	8.71269e-06		21398413	8.06095	25.9288	-1.68526	0.00482702
21398438	12.366	142.25	-3.50906	5.21e-19		21398438	52.6342	147.454	-1.48854	7.12648e-07		21398438	22.5704	149.722	-2.73018	1.68e-19
21398440	2.04162	119.512	-5.87096	6.39e-18		21398440	0	123.811	-9.41946	6.06889e-14		21398440	0.64131	125.741	-7.60749	4.12e-12
21398449	22.4521	70.0094	-1.62692	0.000728135		21398449	0	72.5476	-8.6481	1.31273e-11		21398449	1.28494	73.6778	-5.83632	1.27e-12
21398477	6.00773	51.7943	-3.09141	1.19e-07		21398477	2.24849	53.6965	-4.55599	2.16919e-10		21398477	2.24997	54.5251	-4.5953	5.13e-11
21398768	23.643	92.7213	-1.95914	6.56e-07		21398768	11.9281	96.0593	-2.99677	1.48424e-13		21398768	4.83381	97.5612	-4.33424	2.82e-19
21398811	1.96748	77.5612	-5.25595	1.44e-12		21398811	0	80.4183	-8.79713	8.50196e-12		21398811	0.323718	81.6501	-7.88059	9.51e-10
21398966	9.17515	30.5522	-1.73355	0.00617427		21398966	0	31.6496	-7.45087	4.964e-08		21398966	2.90121	32.1494	-3.46904	2.85e-06
21399125	2.67481	18.4342	-2.76953	0.00261549		21399125	0.952952	19.1047	-4.29044	0.00012326		21399125	0.647435	19.3996	-4.91047	0.000141959
21399146	0.350551	7.13372	-4.2832	0.0264649		21399146	0.983868	7.39776	-2.91163	0.0406787		21399146	0	7.51226	-5.39943	0.0018123
21399230	0	41.8412	-7.79714	1.12e-08		21399230	2.98252	43.3541	-3.87454	4.3681e-09		21399230	8.05471	44.0319	-2.44973	4.79e-06
21399306	15.3775	56.06	-1.84932	0.00230304		21399306	2.02508	58.0974	-4.87957	1.65793e-11		21399306	3.86856	59.0009	-3.93054	4.42e-12
21399349	56.2577	154.016	-1.45422	4.24e-08		21399349	0	159.599	-9.7859	4.59472e-15		21399349	3.86181	162.07	-5.389	2.81e-28
21399352	202.371	584.644	-1.53348	1.51e-12		21399352	40.5944	605.999	-3.89987	2.84227e-55		21399352	10.3172	615.37	-5.89828	2.09e-87
21399401	2.43859	20.9669	-3.12555	0.00100263		21399401	0.632311	21.7407	-5.06178	0.000111033		21399401	0.647435	22.0712	-5.09706	7.7e-05
21399491	12.8184	50.4847	-1.97163	3.26e-05		21399491	8.36662	52.3136	-2.63082	1.81219e-07		21399491	6.11473	53.1243	-3.11751	1.95e-09
21399521	10.1374	339.673	-5.05781	3.48e-54		21399521	75.7503	351.861	-2.21662	9.47298e-05		21399521	17.7333	357.364	-4.33275	8.07e-59
21399541	16.6205	61.9008	-1.90641	8.42e-05		21399541	6.57541	64.1002	-3.28906	7.76218e-11		21399541	15.8126	65.1061	-2.04225	2.79e-06
21399685	26.0478	58.8702	-1.18023	0.00813305		21399685	28.774	60.9826	-1.08348	0.00962098		21399685	14.178	61.9294	-2.127	6.54e-07
21399687	48.5397	513.572	-3.41386	4.78e-42		21399687	208.815	532.22	-1.35092	3.98324e-16		21399687	58.6148	540.459	-3.20416	1.37e-60
21399692	8.4186	33.4408	-1.98308	0.00300237		21399692	3.53954	34.6605	-3.27772	3.01592e-05		21399692	0	35.2025	-7.62761	1.5e-08
21399740	10.0785	43.3991	-2.09727	0.000103222		21399740	0	44.9884	-7.95882	1.60508e-09		21399740	0	45.6846	-8.0042	1.09e-09
21399916	65.877	266.393	-2.01968	2.15e-15		21399916	38.5065	276.153	-2.84042	7.85735e-27		21399916	36.1381	280.398	-2.95667	1.28e-32
21399943	26.7053	68.3844	-1.35971	0.00482		21399943	7.32241	70.9146	-3.28881	2.07262e-09		21399943	4.19534	71.9914	-4.10246	3.35e-12
21400066	0.350551	16.9038	-5.5273	0.000419627		21400066	0.632311	17.505	-4.74853	0.00039911		21400066	0	17.7826	-6.64223	4.67e-06
21400088	149.939	428.901	-1.52021	6.64e-11		21400088	23.7714	444.476	-4.23329	5.26809e-70		21400088	17.7163	451.382	-4.67004	8.1e-78
21400128	106.253	269.142	-1.34245	4.12e-11		21400128	25.5093	278.843	-3.44932	5.45438e-39		21400128	103.814	283.204	-1.44754	5.16e-15
21400191	608.251	1527.16	-1.32933	8.77e-17		21400191	0	1581.93	-13.0948	5.37892e-27		21400191	572.092	1606.67	-1.48974	5.21e-05
21400268	21.3273	180.291	-3.08645	4.36e-18		21400268	59.7736	186.845	-1.64303	7.55357e-13		21400268	26.4006	189.739	-2.84439	9.52e-24
21400374	46.3731	97.9808	-1.07599	0.000710579		21400374	26.4123	101.513	-1.94642	2.49232e-07		21400374	29.6995	103.103	-1.79591	2.25e-08
21400381	5.21527	50.2697	-3.28809	3.61e-08		21400381	2.36767	52.0861	-4.49677	2.17341e-10		21400381	0.967352	52.9004	-5.77282	1.67e-09
21400382	183.005	397.817	-1.11906	0.0408453		21400382	87.685	412.26	-2.23065	5.88938e-30		21400382	58.6527	418.686	-2.83511	6.77e-42
21400451	29.5892	118.309	-1.99885	1.33e-10		21400451	4.22968	122.572	-4.84915	2.6454e-23		21400451	32.8842	124.486	-1.9203	2.66e-11
21400555	18.7043	63.3722	-1.76054	5.11e-05		21400555	0	65.6766	-8.50504	4.4076e-11		21400555	6.4524	66.6895	-3.37058	2.37e-12
21400611	38.8532	170.981	-2.14567	3.03e-09		21400611	3.98834	177.242	-5.49223	4.10012e-27		21400611	1.93312	179.965	-6.53994	1.97e-23
21400656	2.91727	28.2099	-3.23265	0.000246211		21400656	2.98252	29.2491	-3.30466	1.67378e-05		21400656	1.6149	29.7026	-4.20253	4.64e-06
21400663	33.8594	170.035	-2.32475	5.58e-17		21400663	9.44772	176.186	-4.21548	7.94874e-33		21400663	9.35667	178.926	-4.258	1.59e-35
21400698	0.707331	9.40217	-3.77234	0.0224605		21400698	0.979383	9.75026	-3.31244	0.0147312		21400698	1.28875	9.90108	-2.94049	0.0196649
21400713	43.6006	90.6593	-1.04965	0.00344176		21400713	23.8049	93.9505	-1.9782	1.00808e-08		21400713	12.578	95.4079	-2.92353	1.14e-15
21400885	4.57585	38.2941	-3.09031	3.07e-05		21400885	4.15888	39.6756	-3.23225	4.76762e-07		21400885	7.10511	40.2977	-2.50457	4.94e-06
21400953	6.97902	47.3124	-2.74101	7.92e-07		21400953	1.33094	49.0127	-5.22327	1.17807e-09		21400953	1.61025	49.7783	-4.9486	2.96e-10
21401188	27.0265	70.5403	-1.37234	0.00673368		21401188	10.3518	73.1056	-2.81008	5.00858e-11		21401188	26.4453	74.2362	-1.4896	8.85e-06
21401197	41.1966	174.197	-2.07221	6.28e-11		21401197	5.19161	180.525	-5.10906	2.29674e-29		21401197	8.37474	183.344	-4.45088	3.43e-33
21401365	20.4168	58.5939	-1.5211	0.000196965		21401365	19.0849	60.7169	-1.67323	1.59635e-05		21401365	7.40115	61.6588	-3.05688	4.82e-10
21401599	2.09427	38.1178	-4.21409	4.1e-07		21401599	0.952952	39.5136	-5.33613	1.41535e-07		21401599	0.969677	40.1193	-5.37437	7.8e-08
21401779	0.71356	8.7717	-3.6642	0.0412647		21401779	0	9.09692	-5.65207	0.00115487		21401779	0.320655	9.2386	-4.73562	0.00524374
21401843	130.463	515.724	-1.98725	2.11e-23		21401843	79.2649	534.376	-2.75608	3.4008e-53		21401843	57.9922	542.693	-3.22554	1.2e-74
21401921	43.0173	93.4972	-1.12094	0.00101633		21401921	26.5729	96.8417	-1.8665	5.28202e-08		21401921	45.8028	98.3669	-1.1024	0.000714994
21402050	2.08804	11.3571	-2.46139	0.0336025		21402050	0	11.7633	-6.0233	9.6469e-05		21402050	0	11.9482	-6.06895	7.57e-05
21402054	7.47785	28.579	-1.93261	0.00329539		21402054	0	29.6135	-7.35502	7.83885e-08		21402054	0	30.0784	-7.40061	5.27e-08
21402404	47.8736	133.507	-1.48185	1.53e-06		21402404	57.1881	138.343	-1.27792	7.61485e-05		21402404	33.8438	140.497	-2.05324	7.97e-14
21402456	6.18374	18.7792	-1.60909	0.039685		21402456	1.67801	19.4568	-3.56175	0.000148428		21402456	2.5814	19.7593	-2.9372	0.000330792
21402492	28.9013	94.4627	-1.70178	2.22e-06		21402492	12.3814	97.9085	-2.97925	2.91465e-15		21402492	10.3195	99.4196	-3.26861	1.02e-17
21402651	8.56345	783.351	-6.52366	9.93e-90		21402651	38.8626	811.785	-4.38967	8.09711e-93		21402651	51.5996	824.366	-3.99791	8.71e-26
21402709	230.172	557.433	-1.27618	2.09e-20		21402709	256.889	577.539	-1.16752	7.20705e-17		21402709	175.334	586.551	-1.74185	2.1e-36
21402729	2.43236	15.5427	-2.69354	0.00769894		21402729	3.99731	16.0992	-2.02302	0.0140737		21402729	1.61246	16.3503	-3.34236	0.000825201
21402759	18.4709	61.0215	-1.72656	9.35e-05		21402759	20.9335	63.2397	-1.59389	8.79266e-05		21402759	12.5756	64.229	-2.35202	2.6e-08
21402923	111.439	583.615	-2.39393	1.04e-23		21402923	118.409	604.859	-2.35087	5.27458e-44		21402923	8.06423	614.241	-6.25164	5.56e-83
21402925	75.2012	488.333	-2.70148	4.19e-39		21402925	93.7601	506.082	-2.4298	6.1103e-32		21402925	6.76597	513.913	-6.24622	3.37e-70
21403033	0.35678	21.4212	-5.86934	9.53e-05		21403033	0	22.1795	-6.93829	9.537e-07		21403033	3.53333	22.5299	-2.66959	0.00142979
21403106	2.46008	106.552	-5.4769	6.05e-17		21403106	0.347072	110.432	-8.2926	5.6192e-11		21403106	35.1533	112.144	-1.67378	5.96e-09
21403148	305.337	673.73	-1.13991	1.61e-15		21403148	17.8891	698.13	-5.27854	1.12929e-106		21403148	118.308	709.003	-2.58299	8.38e-80
21403152	213.017	1858.56	-3.12692	9.58e-95		21403152	102.009	1926.24	-4.23975	0.000169336		21403152	19.3777	1956.07	-6.65844	8.76e-78
21403224	5.95997	20.7536	-1.81784	0.0302212		21403224	1.6825	21.5003	-3.70449	6.78101e-05		21403224	8.70702	21.8368	-1.32628	0.0379613
21403517	23.1714	153.879	-2.73209	1.09e-16		21403517	4.24314	159.397	-5.2276	1.36676e-26		21403517	68.7077	161.886	-1.23671	3.59e-07
21403736	26.1467	152.459	-2.53425	2.25e-14		21403736	12.5649	157.992	-3.63773	2.71579e-24		21403736	7.40359	160.441	-4.43589	5.37e-31
21403874	28.2487	113.287	-2.00397	9.8e-10		21403874	9.18443	117.419	-3.67833	5.96993e-21		21403874	8.07394	119.235	-3.88619	8.61e-22
21403902	7.73276	23.6811	-1.60683	0.028666		21403902	7.58971	24.5482	-1.69753	0.0188788		21403902	1.93397	24.9303	-3.68742	1.65e-05
21403929	410.148	870.31	-1.08679	9.72e-12		21403929	338.675	901.983	-1.41331	2.28897e-23		21403929	250.148	915.979	-1.87242	4.47e-49
21404089	22.8077	49.194	-1.11609	0.0301694		21404089	14.0813	51.0054	-1.85712	6.04293e-05		21404089	0.965028	51.791	-5.74298	3.59e-09
21404145	34.4705	133.422	-1.94782	5.65e-12		21404145	10.2765	138.245	-3.73199	2.34984e-21		21404145	10.318	140.394	-3.76633	3.14e-27
21404284	8.25932	44.5844	-2.44133	1.43e-05		21404284	11.2709	46.2119	-2.04404	9.98261e-05		21404284	2.90977	46.9215	-4.01473	2.31e-09
21404371	12.3488	55.3328	-2.16981	2.7e-06		21404371	5.68829	57.3433	-3.35337	1.95977e-09		21404371	0.968939	58.2305	-5.9117	5.66e-10
21404712	1.6973	11.277	-2.73125	0.0307173		21404712	0.347072	11.6984	-5.05472	0.00159827		21404712	0	11.8745	-6.06145	0.000117246
21404770	78.2625	561.937	-2.84393	2.36e-50		21404770	0.663227	582.452	-9.79666	4.17029e-20		21404770	23.1837	591.459	-4.67272	1.02e-17
21404779	143.98	751.919	-2.38669	1.46e-40		21404779	360.243	779.175	-1.11398	1.48939e-15		21404779	175.28	791.256	-2.17427	1.05e-46
21404848	1469.49	6234.46	-2.08557	2.09e-47		21404848	2120.41	6459.41	-1.60708	4.19833e-06		21404848	3099.84	6560.1	-1.08151	3.5e-22
21404980	775.721	3839.81	-2.30741	1.17e-70		21404980	1.30002	3979.49	-11.5694	7.54441e-54		21404980	2.25916	4041.46	-10.8061	1.1e-81
21405016	30.9511	87.927	-1.49679	0.000485831		21405016	5.85483	91.1154	-3.95276	1.47709e-16		21405016	7.74347	92.54	-3.57924	3.83e-17
21405038	24.9622	74.1463	-1.57355	4.46e-05		21405038	7.13243	76.8553	-3.4204	3.55711e-13		21405038	21.6123	78.0445	-1.85281	1.02e-07
21405092	24.9032	159.708	-2.66536	3.72e-15		21405092	10.5358	165.466	-3.96556	8.35976e-07		21405092	23.1812	168.044	-2.85663	3.81e-23
21405124	201.2	1913.11	-3.25007	1.83e-116		21405124	444.745	1982.54	-2.15572	6.09856e-42		21405124	268.584	2013.27	-2.90603	2.08e-17
21405156	101.743	245.263	-1.26612	1.18e-09		21405156	72.2198	254.107	-1.819	2.00009e-17		21405156	116.731	258.068	-1.1446	2.93e-11
21405178	0.983741	41.4499	-5.34927	2.01e-07		21405178	2.58707	42.9406	-4.03955	1.19554e-08		21405178	2.25842	43.6094	-4.2721	1.54e-09
21405402	5.82696	162.756	-4.81201	2.38e-26		21405402	43.0413	168.731	-1.97051	0.00821987		21405402	74.3983	171.331	-1.2032	3.81e-05
21405559	158.924	386.383	-1.28336	7.07e-14		21405559	46.369	400.355	-3.11335	2.27246e-48		21405559	104.131	406.6	-1.96494	3.97e-35
21405571	88.9691	287.066	-1.68539	1.28e-14		21405571	10.0536	297.48	-4.87578	3.42489e-51		21405571	32.2158	302.107	-3.22839	1.6e-45
21405857	67.7292	145.466	-1.09852	9.82e-05		21405857	28.8065	150.745	-2.38044	3.15881e-14		21405857	15.4839	153.089	-3.30591	3.65e-27
21406169	441.339	1607.59	-1.86553	9.92e-08		21406169	309.63	1666.31	-2.42905	2.92812e-52		21406169	67.6744	1692.06	-4.64361	1.24e-181
21406239	17.4684	72.7206	-2.0619	2.8e-06		21406239	6.99328	75.3411	-3.44299	3.97938e-10		21406239	11.2976	76.5055	-2.76095	2.02e-10
21406279	78.0965	225.743	-1.52572	1.4e-06		21406279	26.3111	234.003	-3.14232	5.63606e-18		21406279	32.5638	237.625	-2.86726	1.07e-30
21406303	46.9857	113.005	-1.26632	6.91e-05		21406303	51.4853	117.065	-1.18608	4.60678e-05		21406303	53.4988	118.888	-1.152	1.55e-05
21406488	14.761	371.299	-4.63661	3.89e-60		21406488	0.316156	384.776	-10.0934	2.63717e-16		21406488	3.21817	390.76	-6.92118	3.69e-45
21406524	18.4292	81.9935	-2.14287	5.08e-08		21406524	6.49563	84.9659	-3.70098	9.88961e-16		21406524	2.25916	86.2891	-5.25636	2.27e-16
21406637	89.8465	495.269	-2.46946	2.78e-30		21406637	0	513.239	-11.4709	7.18271e-21		21406637	9.01225	521.214	-5.85153	5.25e-80
21406640	1731.27	7626.38	-2.13944	9.29e-106		21406640	244.234	7902.27	-5.01596	1.14496e-21		21406640	2590.61	8025.11	-1.63123	6.73e-75
21406889	110.914	235.509	-1.08215	3.01e-05		21406889	15.8566	244.028	-3.95243	6.52711e-39		21406889	13.2175	247.844	-4.22841	4.77e-44
21406946	12.1173	55.9936	-2.20084	7.34e-06		21406946	12.1315	58.0498	-2.25969	3.98032e-07		21406946	15.1393	58.945	-1.96052	3.84e-06
21407062	1.30657	19.7363	-3.87407	0.000492369		21407062	3.6238	20.4393	-2.50123	0.00159448		21407062	4.19851	20.7578	-2.30747	0.00243205
21407207	37.3137	1600.17	-5.42795	3.77e-171		21407207	0	1658.39	-13.1629	3.25234e-27		21407207	1.6094	1684.19	-10.0288	5.47e-51
21407230	6.3181	44.3385	-2.79165	1.66e-06		21407230	2.60902	45.9515	-4.13424	1.01231e-09		21407230	0	46.6625	-8.035	7.91e-10
21407283	255.45	668.64	-1.38861	0.000937371		21407283	90.9573	693.05	-2.92939	1.79881e-53		21407283	49.9341	703.779	-3.81632	1.29e-90
21407310	429.363	951.272	-1.1467	2.65e-13		21407310	463.336	985.801	-1.08968	0.00974247		21407310	168.479	1001.17	-2.57114	1.19e-16
21407368	137.647	411.422	-1.58315	5.88e-13		21407368	12.1111	426.419	-5.14643	5.01668e-13		21407368	3.8617	433.017	-6.80648	5.1e-51
21407370	221.89	660.904	-1.57646	6.3e-11		21407370	13.9766	685.146	-5.62094	4.21048e-19		21407370	2.25156	695.697	-8.2681	4.28e-46
21407384	534.025	1434.6	-1.42682	9.06e-32		21407384	350.142	1486.67	-2.085	4.63341e-59		21407384	185.308	1509.77	-3.02604	3.29e-126
21407499	67.8793	215.883	-1.67322	5.09e-08		21407499	37.3197	223.759	-2.58381	5.94802e-18		21407499	23.875	227.237	-3.25094	1.12e-29
21407513	13.4052	80.3509	-2.5717	9.52e-10		21407513	7.53733	83.285	-3.46669	2.301e-14		21407513	6.12783	84.5771	-3.78696	1.45e-16
21407518	64.9158	347.003	-2.41356	3.18e-19		21407518	19.5008	359.684	-4.19809	1.96753e-53		21407518	20.3151	365.243	-4.16839	5.21e-62
21407571	41.0096	183.857	-2.157	1.28e-15		21407571	12.7639	190.523	-3.89959	1.3536e-34		21407571	13.5597	193.476	-3.83625	4.16e-35
21407590	8.47405	32.7085	-1.94563	0.000871958		21407590	7.82257	33.8969	-2.11196	0.000117895		21407590	6.4469	34.4229	-2.41651	1.93e-05
21407612	27.8775	65.5618	-1.23876	0.00322064		21407612	18.1669	67.9191	-1.90791	1.50892e-06		21407612	19.3271	68.9858	-1.83449	1.48e-06
21407703	34.4012	91.6716	-1.41365	0.000271867		21407703	11.8154	94.9736	-3.00812	3.62017e-12		21407703	16.7766	96.4726	-2.52337	3.15e-10
21407821	20.333	48.599	-1.25457	0.00702781		21407821	15.2846	50.3668	-1.71567	6.50489e-05		21407821	16.4404	51.1494	-1.6372	7.56e-05
21407986	18.7827	67.7347	-1.86237	4.37e-05		21407986	21.4905	70.1782	-1.70346	1.79281e-06		21407986	34.8178	71.2732	-1.03331	0.00138711
21408076	34.3272	128.66	-1.91499	1.58e-07		21408076	60.8686	133.329	-1.13143	0.000233688		21408076	20.3197	135.386	-2.73684	6.36e-18
21408153	32.305	107.922	-1.7455	1.83e-07		21408153	34.207	111.801	-1.70588	2.66062e-07		21408153	9.99809	113.548	-3.50568	1.69e-21
21408419	42.0517	111.082	-1.404	2.41e-06		21408419	47.1339	115.092	-1.2879	5.78553e-06		21408419	17.087	116.883	-2.77408	1.32e-18
21408444	1.03016	46.3827	-5.50384	6.14e-08		21408444	1.30451	48.0409	-5.19752	2.07642e-09		21408444	1.61257	48.7953	-4.91934	6.29e-10
21408461	11.257	58.3044	-2.37463	1.18e-07		21408461	13.3214	60.4136	-2.17526	1.58091e-07		21408461	26.7583	61.3534	-1.19711	0.000714257
21408554	432.162	1088.71	-1.33398	7.08e-13		21408554	170.383	1128.44	-2.72855	4.31068e-62		21408554	98.643	1145.91	-3.53798	1.19e-126
21408646	141.327	374.735	-1.40264	9.19e-09		21408646	37.2803	388.289	-3.37303	6.59943e-47		21408646	30.6109	394.328	-3.68664	2.37e-69
21408789	22.2805	77.8881	-1.80931	5.66e-06		21408789	16.1867	80.6949	-2.32258	1.63806e-07		21408789	40.2795	81.9607	-1.02403	0.00193059
21408830	138.979	303.119	-1.12855	1.57e-07		21408830	66.7824	314.07	-2.23015	7.11633e-29		21408830	74.1727	318.974	-2.10439	7.33e-31
21408951	24.6608	138.31	-2.49211	7.93e-15		21408951	8.54314	143.37	-4.0725	1.05225e-24		21408951	21.5927	145.591	-2.75289	8.14e-18
21409224	38.2357	176.494	-2.1975	2.48e-15		21409224	11.7047	182.904	-3.95862	7.50301e-33		21409224	9.99333	185.743	-4.21599	3.04e-36
21409242	87.2913	182.858	-1.06444	1.26e-05		21409242	28.2325	189.533	-2.74079	2.20573e-21		21409242	32.1987	192.462	-2.57868	6.31e-21
21409304	47.55	249.902	-2.38386	1.22e-14		21409304	5.42799	259.027	-5.54615	7.91624e-39		21409304	8.7161	263.032	-4.9169	1.31e-46
21409328	30.5188	119.774	-1.96457	1.18e-08		21409328	9.71053	124.128	-3.66477	7.60153e-22		21409328	8.71156	126.051	-3.8558	9.74e-25
21409374	11.0255	78.9154	-2.82592	1.3e-09		21409374	0.316156	81.8035	-7.85992	9.43964e-10		21409374	1.29339	83.0633	-6.00902	2.19e-13
21409377	35.4093	81.4558	-1.20154	0.000765475		21409377	14.1417	84.3874	-2.5643	2.74725e-09		21409377	12.9054	85.7116	-2.73156	4.71e-13
21409410	24.7473	84.9594	-1.76995	1.1e-05		21409410	12.7903	88.0471	-2.78439	4.00856e-13		21409410	9.34844	89.4198	-3.2573	1.19e-14
21409442	389.21	824.766	-1.08377	3.9e-16		21409442	78.9503	854.577	-3.42991	4.98386e-64		21409442	133.12	867.899	-2.70454	1.93e-75
21409447	31.7057	150.884	-2.2449	1.19e-13		21409447	16.9272	156.322	-3.20193	4.33588e-25		21409447	17.4159	158.754	-3.18866	1.71e-24
21409538	75.0247	304.359	-2.01327	6.86e-13		21409538	37.2504	315.416	-3.08031	5.00532e-45		21409538	62.5702	320.307	-2.35622	8.14e-37
21409677	6.70261	19.7695	-1.55021	0.0436147		21409677	0.983868	20.487	-4.38198	5.42454e-05		21409677	1.61246	20.806	-3.68967	7.49e-05
21409765	10.3009	121.051	-3.56348	7.13e-20		21409765	34.7585	125.467	-1.85668	3.92386e-07		21409765	12.5633	127.407	-3.34141	3.43e-22
21409767	32.1768	126.921	-1.97684	1.23e-10		21409767	41.309	131.495	-1.67156	3.31553e-10		21409767	34.1879	133.54	-1.96612	1.47e-13
21409810	42.4906	98.2296	-1.20009	0.0138546		21409810	37.5625	101.792	-1.43664	1.89376e-06		21409810	26.7686	103.379	-1.94928	6.45e-08
21409830	22.8416	167.444	-2.88553	1.85e-17		21409830	63.0798	173.535	-1.46424	2.19808e-05		21409830	25.1613	176.209	-2.80877	3.26e-22
21409896	28.2452	88.5893	-1.64953	4.34e-06		21409896	6.54001	91.8376	-3.81078	2.13462e-16		21409896	14.8271	93.2493	-2.653	4.55e-13
21409909	4.39984	40.8555	-3.20929	4.02e-07		21409909	9.18891	42.3297	-2.20524	1.26466e-05		21409909	6.77231	42.9913	-2.66619	3.61e-07
21409987	2.0139	31.0614	-3.9329	8.76e-06		21409987	6.12662	32.1622	-2.38201	0.000327291		21409987	13.2262	32.6644	-1.30515	0.0197937
21409993	45.6277	259.322	-2.50699	4.33e-27		21409993	75.4327	268.72	-1.83373	2.86474e-20		21409993	4.18468	272.908	-6.02476	2.01e-41
21410115	79.4233	194.406	-1.28812	6.91e-08		21410115	22.1692	201.459	-3.19228	1.04758e-26		21410115	23.222	204.592	-3.13937	6.44e-34
21410141	27.2413	97.8137	-1.83662	4.69e-08		21410141	3.58392	101.362	-4.8159	1.16736e-19		21410141	6.78467	102.937	-3.9254	1.01e-18
21410144	100.809	251.124	-1.3187	5.78e-11		21410144	37.6688	260.2	-2.79466	7.63668e-29		21410144	83.8266	264.254	-1.65634	3.05e-17
21410147	1.07034	18.3334	-4.14524	0.00220577		21410147	0.347072	19.0258	-5.75636	0.000176298		21410147	0.320655	19.3092	-5.8012	0.000112842
21410195	420.761	3521.37	-3.06718	7.49e-108		21410195	1152.82	3648.95	-1.66214	1.593e-49		21410195	273.536	3705.65	-3.75981	3.67e-69
21410196	22.2174	81.6296	-1.86999	2.75e-07		21410196	3.52208	84.587	-4.55969	1.83368e-16		21410196	3.21659	85.9023	-4.73614	2.82e-17
21410291	5.04549	32.3686	-2.67168	5.44e-05		21410291	1.67801	33.5542	-4.35043	2.8657e-07		21410291	2.26528	34.0723	-3.91478	4.73e-07
21410292	20.8248	51.8527	-1.31002	0.011432		21410292	4.27405	53.74	-3.656	3.67998e-09		21410292	7.09138	54.5756	-2.94364	1.11e-09
21410335	22.5554	93.2842	-2.0409	1.46e-08		21410335	12.9608	96.6816	-2.89008	1.59061e-14		21410335	11.5905	98.1815	-3.08116	7.65e-16
21410392	23.7324	142.794	-2.57601	8.13e-16		21410392	4.27357	147.969	-5.11891	8.89807e-27		21410392	4.18088	150.267	-5.16442	9.27e-28
21410471	13.0007	41.0986	-1.6643	0.00102085		21410471	2.90323	42.5955	-3.85923	1.35851e-08		21410471	18.3651	43.2541	-1.23574	0.00513077
21410841	25.3883	65.7568	-1.38313	0.00214599		21410841	4.61616	68.1364	-3.8913	4.00291e-13		21410841	13.862	69.1963	-2.31941	1.25e-09
21410876	34.3701	568.824	-4.04877	2.06e-66		21410876	5.60451	589.667	-6.72598	6.21908e-61		21410876	2.25695	598.739	-8.05148	1.44e-43
21411092	5.60942	19.7684	-1.83517	0.0354356		21411092	0.636796	20.4796	-4.97191	8.75324e-05		21411092	0.96809	20.7994	-4.42613	5e-05
21411204	12.8046	65.0972	-2.35827	1.56e-07		21411204	28.0265	67.4373	-1.26419	0.000382158		21411204	30.9299	68.4883	-1.14658	0.00101337
21411306	6.78578	95.2535	-3.80781	2.84e-16		21411306	13.0681	98.6916	-2.93389	3.60936e-12		21411306	10.3103	100.23	-3.28038	2.17e-18
21411755	600.178	1276.02	-1.08798	1.26e-12		21411755	95.7916	1322.12	-3.78691	1.28051e-09		21411755	142.492	1342.78	-3.23604	4.41e-124
21411841	38.5027	122.828	-1.68157	3.99e-06		21411841	12.6138	127.278	-3.32324	4.22706e-21		21411841	24.8168	129.26	-2.3804	8.95e-17
21411978	47.463	189.161	-1.99673	2.26e-15		21411978	37.4129	195.982	-2.39096	4.29614e-22		21411978	46.1262	199.034	-2.1097	3.01e-21
21412340	137.28	857.456	-2.64537	1.24e-45		21412340	9.38541	888.646	-6.55114	3.33875e-92		21412340	11.6074	902.368	-6.28071	1.74e-111
112090256	13.7959	57.067	-2.04	5.52e-06		112090256	3.89559	59.1155	-3.91434	1.09974e-11		112090256	6.77231	60.0412	-3.14818	5.13e-11
112090326	449.638	1490.6	-1.73036	2.14e-28		112090326	60.1446	1545.05	-4.68586	1.93597e-137		112090326	45.1174	1568.95	-5.11947	9.25e-187
112090523	27.5038	73.2905	-1.40245	0.00218299		112090523	19.3393	75.9315	-1.97374	2.90477e-08		112090523	18.0496	77.1195	-2.09456	1.3e-08
112090605	53.7424	132.944	-1.3095	2.02e-05		112090605	31.6015	137.801	-2.12156	5.74214e-13		112090605	15.4701	139.926	-3.17699	1.58e-21
112091214	5.06418	21.9612	-2.11211	0.0124009		112091214	0	22.773	-6.97711	8.37152e-07		112091214	0.643635	23.1205	-5.16497	4.44e-05
112091308	0.35678	7.11197	-4.2795	0.0253435		112091308	0	7.37637	-5.35054	0.0021561		112091308	0	7.48907	-5.39572	0.00171232
112091309	1.38071	43.3836	-4.99078	8.46e-08		112091309	0	44.9839	-7.95869	2.30308e-09		112091309	0.961965	45.6772	-5.56223	2.28e-08
112091327	0	4.53575	-4.59188	0.0364631		112091327	0	4.69758	-4.69939	0.0165915		112091327	0	4.77109	-4.74499	0.0146975
112091456	1.66335	46.6516	-4.78206	7.96e-09		112091456	0	48.3302	-8.06226	6.47742e-10		112091456	0	49.084	-8.1078	4.79e-10
112091458	2.35822	15.8511	-2.74002	0.00563311		112091458	0	16.4292	-6.50584	8.02618e-06		112091458	0	16.6828	-6.5512	6.14e-06
112091499	91.9436	309.067	-1.74356	9.25e-09		112091499	32.6502	320.321	-3.28529	2.93272e-35		112091499	24.7752	325.295	-3.71413	1.56e-13
112091531	38.8723	201.217	-2.36289	1.6e-16		112091531	8.64737	208.529	-4.56763	7.77175e-35		112091531	9.65884	211.771	-4.45274	2.4e-39
112091961	30.2701	98.5294	-1.69614	2.13e-06		112091961	6.59735	102.114	-3.96009	2.80724e-19		112091961	11.6075	103.702	-3.1591	4.3e-18
112092080	39.9996	92.212	-1.20334	0.000571233		112092080	0	95.5993	-9.04643	1.25856e-12		112092080	2.58605	97.0716	-5.23352	1.76e-17
112092094	175.638	383.6	-1.12502	4.61e-10		112092094	153.225	397.469	-1.37355	3.78419e-15		112092094	97.3884	403.639	-2.05151	1.49e-34
112092457	26.4815	127.282	-2.27251	1.63e-13		112092457	15.9877	131.899	-3.04127	4.18007e-21		112092457	14.4711	133.948	-3.20831	2.1e-18
112092566	11.2292	26.8786	-1.2592	0.0431335		112092566	2.90723	27.8448	-3.24786	4.37337e-05		112092566	6.13163	28.2787	-2.20623	0.000314979
112092893	5.77285	24.9311	-2.08014	0.0250135		112092893	0	25.8322	-7.15861	1.85597e-07		112092893	9.03664	26.2336	-1.5383	0.0142495
112093099	2.42613	16.85	-2.811	0.00561461		112093099	0	17.4673	-6.5938	5.55582e-06		112093099	0.961965	17.738	-4.19826	0.000273265
112093444	0.35678	6.13994	-4.06756	0.0431335		112093444	0.320641	6.36922	-4.17703	0.0205805		112093444	0.320655	6.46623	-4.22215	0.0189985
112093557	658.878	2660.64	-2.01472	7.95e-30		112093557	93.6116	2757.58	-4.88634	6.08751e-166		112093557	82.8633	2800.29	-5.07869	1.04e-67
112093580	52.9273	181.049	-1.76542	2.36e-08		112093580	18.6187	187.628	-3.33085	7.64379e-31		112093580	41.2327	190.541	-2.20776	4.16e-14
112093658	26.4446	86.4852	-1.70078	1.55e-05		112093658	13.3433	89.641	-2.74293	4.82575e-13		112093658	17.104	91.0308	-2.41265	9.57e-12
112093771	0.701101	24.5111	-5.16393	0.000144703		112093771	0	25.4246	-7.13614	5.19136e-07		112093771	0	25.8093	-7.18121	2.97e-07
112093972	34.4566	73.2487	-1.07987	0.00675684		112093972	23.9823	75.8999	-1.66421	1.69617e-06		112093972	34.4965	77.0829	-1.1597	0.000295231
112094028	10.111	48.0184	-2.22381	0.00038061		112094028	6.25028	49.7492	-2.99677	7.56764e-09		112094028	5.48493	50.5288	-3.20375	1.53e-09
112094128	37.6366	132.292	-1.81664	1.37e-10		112094128	16.6599	137.046	-3.03803	9.2694e-21		112094128	15.1509	139.191	-3.19914	2.71e-24
112094174	124.404	396.841	-1.67031	4.71e-11		112094174	24.5154	411.259	-4.05517	1.04737e-54		112094174	28.0131	417.649	-3.89679	1.53e-63
112094322	2.04785	21.4001	-3.38801	0.000265735		112094322	3.29419	22.1619	-2.75555	0.000311624		112094322	0.320655	22.51	-6.02117	1.92e-05
112094340	18.6967	139.793	-2.91471	5.28e-16		112094340	20.4493	144.797	-2.81693	7.03826e-19		112094340	36.4088	147.069	-2.0134	1.1e-13
112094381	8.65763	196.466	-4.48017	6.65e-32		112094381	0	203.6	-10.1368	3.45031e-16		112094381	0.323718	206.773	-9.2205	1.35e-13
112094480	200.638	4247.49	-4.40686	6.09e-243		112094480	5.54316	4401.88	-9.62764	3.08547e-145		112094480	4.82451	4470.01	-9.85221	6.97e-142
112094533	50.4204	142.33	-1.49743	4.27e-08		112094533	42.6579	147.463	-1.79078	1.11036e-12		112094533	48.7308	149.767	-1.62009	2.33e-09
112094611	7.75707	46.4171	-2.57506	0.000122328		112094611	1.04122	48.0722	-5.6031	1.43815e-08		112094611	1.93618	48.8298	-4.65701	5.22e-10
112094660	290.137	803.747	-1.46944	1.34e-25		112094660	5.73715	832.672	-7.22138	1.18361e-77		112094660	77.7894	845.638	-3.44258	3.41e-19
112094662	581.594	1191.86	-1.03571	8.99e-07		112094662	74.6568	1235.65	-4.05063	2.07413e-14		112094662	228.08	1254.77	-2.45984	2.34e-13
112094664	487.24	1248.27	-1.35764	1.44e-37		112094664	27.7722	1293.42	-5.54478	2.12705e-10		112094664	136.747	1313.54	-3.26405	2.06e-137
112094678	6.04169	78.7422	-3.69003	1.58e-13		112094678	0.983868	81.5596	-6.37555	7.772e-12		112094678	0.32298	82.8355	-7.90098	6.62e-10
112094805	1.05165	49.5224	-5.59549	2.82e-08		112094805	1.70893	51.3217	-4.9613	4.01346e-10		112094805	0.320655	52.1166	-7.23266	3.13e-08
112094818	10.5496	41.8006	-1.98614	0.000184941		112094818	16.642	43.3299	-1.37831	0.00257382		112094818	9.36353	44.0019	-2.23328	1.23e-05
112094888	138.906	509.643	-1.8787	1.33e-24		112094888	258.465	528.115	-1.03103	3.1658e-05		112094888	61.2211	536.294	-3.13059	2.72e-64
112094895	43.0243	257.359	-2.57759	1.09e-24		112094895	1.04122	266.635	-8.08243	6.16351e-20		112094895	7.72424	270.78	-5.12949	2.23e-47
112095170	167.333	405.807	-1.27857	1.68e-15		112095170	148.851	420.486	-1.49868	9.68753e-18		112095170	199.614	427.043	-1.09708	4.29e-13
112095193	7.40994	23.2846	-1.64548	0.0208142		112095193	7.63857	24.1252	-1.66912	0.00987914		112095193	7.10522	24.4986	-1.7874	0.00652746
112095255	56.334	159.483	-1.50316	3.57e-08		112095255	14.4069	165.252	-3.52011	7.67024e-25		112095255	10.6239	167.81	-3.98015	3.99e-29
112095323	73.6234	2406.95	-5.0285	1.15e-210		112095323	1.33543	2493.91	-10.8948	8.4238e-49		112095323	3.87649	2532.74	-9.35226	2.71e-13
novel.1183	1.33429	10.6202	-2.977	0.0357321		novel.1183	0	11.0179	-5.93013	0.000326821		novel.1183	0	11.1829	-5.97508	0.000208513
novel.128	2.36445	52.9398	-4.47562	1.25e-09		novel.128	2.95609	54.8231	-4.21609	1.39972e-10		novel.128	3.54802	55.6897	-3.97214	4.33e-11
novel.212	10.0245	48.5407	-2.2874	8.58e-06		novel.212	10.7782	50.2993	-2.2209	1.61771e-06		novel.212	3.22504	51.0786	-3.98585	6.57e-11
novel.370	7.95518	75.2065	-3.25505	2.24e-11		novel.370	0	77.9554	-8.75176	9.37566e-12		novel.370	1.93323	79.1667	-5.35465	2.36e-14
novel.445	0	5.48773	-4.86746	0.0215607		novel.445	0	5.69449	-4.97737	0.00954265		novel.445	0.32298	5.78057	-4.06065	0.030546
novel.54	2.29654	59.9115	-4.66171	4.29e-11		novel.54	9.0134	62.0799	-2.79925	1.47831e-08		novel.54	11.2715	63.0447	-2.48279	5.55e-09
novel.977	0	14.5861	-6.27696	6.76e-05		novel.977	0	15.1205	-6.38558	1.73088e-05		novel.977	4.51906	15.3552	-1.76504	0.0442223
novel.988	22.4522	54.0891	-1.26825	0.00226841		novel.988	0	56.0522	-8.2761	1.56358e-10		novel.988	0	56.9228	-8.32155	1.15e-10
112093417	0	80.2565	-8.73732	2.36e-11		21399263	0	3986.61	-14.4283	1.06468e-32		112092755	0.64131	534.785	-9.69566	7.34e-20
21402052	0	54.2755	-8.1733	1.4e-09		21399261	0	2706.51	-13.8696	2.44865e-30		112092345	0	44.9163	-7.9802	1.24e-09
21404681	0.350551	89.982	-7.94049	1.75e-09		112092755	0	526.588	-11.5078	5.66039e-21		21397359	0	29.2861	-7.36299	5.84e-08
21412291	0	34.2657	-7.50968	8.19e-08		21410425	1.30002	3752.22	-11.4845	1.24118e-53		21388546	0	25.8943	-7.18529	1.58e-07
21399231	0	32.7961	-7.44554	1.22e-07		21410245	0	298.304	-10.6881	4.84489e-18		21387954	1.9385	258.645	-7.06291	1.83e-28
21387650	0	28.8622	-7.26143	2.75e-07		21392337	0	252.078	-10.4451	2.77803e-17		21387302	0	20.4084	-6.84223	1.34e-06
112090338	0.350551	42.967	-6.87445	7.92e-07		21392222	0	186.142	-10.0078	8.98175e-16		21392086	0	19.7962	-6.79746	2.34e-06
21387616	0	18.4124	-6.61376	1.3e-05		112092540	0	177.312	-9.93743	1.27573e-15		112091515	0	19.7017	-6.79166	2.19e-06
21406176	0	14.2228	-6.24116	7.91e-05		21407204	1.04122	848.808	-9.75405	1.77581e-29		novel.877	3.22124	278.123	-6.43066	4.61e-38
21410338	0	13.6576	-6.18146	0.00015103		21394877	0	147.319	-9.67023	9.77309e-15		21410245	3.54495	302.921	-6.41639	7.8e-41
112095180	0.316595	26.5394	-6.17902	2.55e-05		112093178	0	124.095	-9.42286	5.94844e-14		112093839	0	12.9452	-6.18511	4.1e-05
21390211	0	12.9705	-6.10751	0.000161688		21391979	0	122.365	-9.40266	8.77242e-14		21385813	0	11.9349	-6.06762	7.96e-05
21395231	148.361	9259.3	-5.96983	0		novel.996	0	117.552	-9.34442	1.28282e-13		21405819	0	11.9138	-6.06552	7.64e-05
novel.421	1.75898	106.243	-5.96004	1.12e-15		novel.724	0	111.188	-9.26407	1.78199e-13		21407781	0.323718	21.8472	-5.97783	2.61e-05
21401822	0	11.0327	-5.87391	0.000430343		21392336	0.347072	196.604	-9.12484	2.41769e-13		112094545	0	10.9465	-5.94214	0.000161157
21384663	0	10.6883	-5.82856	0.000482613		21407673	4.94577	2592.11	-9.0434	5.80659e-116		112090528	3.87321	233.484	-5.91522	4.46e-35
112093001	1.03016	56.9359	-5.80038	4.76e-09		21405030	0	75.6082	-8.70761	9.24197e-12		21391568	0	10.5472	-5.88985	0.000213288
112091578	0	9.71168	-5.69044	0.000871958		112094556	0	69.8627	-8.59369	1.87744e-11		21394388	0	10.494	-5.88347	0.00040054
21404955	0	8.74824	-5.53951	0.00160787		21385845	0.641282	250.797	-8.58165	1.58345e-15		112094985	0.961965	56.8217	-5.87743	1.12e-09
21394564	1.05165	44.3757	-5.43665	9.98e-08		21385016	0.316156	128.017	-8.50606	1.86786e-11		novel.414	0	10.2861	-5.85191	0.000312055
21393100	0	8.08343	-5.42594	0.00265937		21398387	5.50328	1880.21	-8.40094	4.27308e-111		21387306	3.21806	181.301	-5.81392	4.87e-28
112093472	0	7.7138	-5.35918	0.00884984		21386669	0	60.0359	-8.3753	1.04613e-10		21410381	2.90755	158.462	-5.76901	1.71e-06
21389056	0.673375	25.2996	-5.21756	6.23e-05		21401965	0	58.3722	-8.33473	1.06676e-10		21398459	1.61564	87.6702	-5.76453	5.84e-15
21395230	1.4022	50.0111	-5.19174	1.5e-08		21394597	0	57.9067	-8.32254	2.6729e-10		21401518	0	9.58053	-5.74978	0.000379662
21389058	1.06411	35.6183	-5.11674	1.05e-06		112094985	0	55.9542	-8.27392	2.3596e-10		21387023	0	9.56002	-5.7472	0.000337884
21408831	1.41466	47.2591	-5.10966	1.63e-08		112091453	0	50.3367	-8.12098	4.39972e-10		21410235	0	9.51038	-5.74096	0.000442487
21385483	0	5.8625	-4.96097	0.0151981		21404859	0	46.9817	-8.02146	9.04539e-10		21404088	0	9.20293	-5.69271	0.000423846
novel.906	0	5.8333	-4.95478	0.0163429		21389365	0	41.35	-7.83686	3.18896e-09		21390290	0	9.19905	-5.69222	0.000470657
21393865	0.35678	11.0602	-4.91516	0.00410143		21386044	0.667713	137.497	-7.71295	2.24215e-12		112091862	0	9.18629	-5.69053	0.000521656
21395296	0	5.51522	-4.8737	0.0224435		21404558	0	37.9255	-7.71251	6.10131e-09		novel.622	0.644373	33.2394	-5.68695	6.15e-06
21383977	0.949786	29.0744	-4.84994	1.55e-05		21405196	0	37.2517	-7.68665	1.20238e-08		112092192	4.83982	245.865	-5.66729	2.99e-38
21403090	0.350551	10.3089	-4.81574	0.00638136		novel.997	0	36.2758	-7.64818	1.50096e-08		21407981	2.89361	146.362	-5.65656	6.45e-25
112091171	0	5.20971	-4.79072	0.0252526		21405370	0	35.2167	-7.60575	1.34383e-08		21397480	0.645959	32.4667	-5.65292	2.91e-06
112093337	1.65712	40.8646	-4.59205	5.86e-08		21388558	0	34.9258	-7.59349	1.27677e-08		21391974	0	8.86514	-5.63868	0.000556435
21392257	0	4.52201	-4.58808	0.0484709		21389527	0	34.8592	-7.59117	1.50994e-08		21399628	0	8.84643	-5.63613	0.000706304
21395229	530.133	12375.8	-4.54667	6.27e-224		21397480	0	31.9644	-7.46526	3.78445e-08		21392260	0.647435	31.9776	-5.63181	3.47e-06
21403447	0.316595	8.45018	-4.52698	0.012496		21385051	0	31.5654	-7.44756	3.54614e-08		112091382	0.64131	30.9782	-5.58717	3.98e-06
112095316	0	4.20735	-4.48368	0.0482455		21391051	0.316156	59.3925	-7.39788	1.1652e-08		21399998	0	8.53183	-5.58316	0.000713192
21386091	0.35678	8.07083	-4.46228	0.0154354		112094677	0	28.852	-7.31811	7.38364e-08		21392468	2.25768	108.022	-5.58076	6.16e-19
novel.470	0.667146	14.5529	-4.42399	0.00250381		21386093	1.27808	202.172	-7.27173	1.24692e-20		21393100	0	8.50865	-5.57993	0.00072097
21410224	2.81686	56.3942	-4.36111	2.64e-10		21398455	0	27.8247	-7.26597	1.07866e-07		112093472	0	8.12956	-5.51492	0.00240141
112090507	0.35678	7.47071	-4.34942	0.0231679		21385843	1.70893	250.876	-7.25703	1.85864e-25		novel.470	0.32298	15.307	-5.46547	0.000252337
21397864	0.316595	7.43121	-4.34299	0.0205747		21407981	0.961922	144.111	-7.19788	1.39801e-15		21391104	17.1222	748.136	-5.45007	4.39e-25
21406421	0.949786	20.3753	-4.34123	0.000310419		112092497	0	26.5279	-7.19673	1.51465e-07		21389365	0.969677	41.9996	-5.43944	3.42e-08
21384902	0.633191	13.5797	-4.34022	0.00407654		21388546	0	25.4994	-7.13988	2.12514e-07		21399363	0.64131	27.9718	-5.4394	8.53e-06
21393353	0.667146	13.2496	-4.289	0.0038695		21404914	0	24.8345	-7.1017	2.59701e-07		21388578	0	7.50511	-5.39828	0.00157436
21406422	2.28408	42.3051	-4.16696	1.68e-07		novel.71	0	24.4725	-7.08076	3.52634e-07		21405696	0.32298	14.586	-5.39643	0.000433016
21407920	0.989971	17.7945	-4.13321	0.000615514		21386496	0	24.1992	-7.06397	3.57594e-07		21387720	0	7.4852	-5.39512	0.0015592
112091082	0.316595	6.164	-4.07229	0.040631		21400674	0	23.5496	-7.02451	4.97826e-07		21398525	0.320655	14.3032	-5.36732	0.000345363
21408244	0.35678	6.1348	-4.06658	0.0407199		novel.662	0.316156	45.015	-6.99773	1.12652e-07		21397335	0.323718	14.2681	-5.36439	0.000390419
21399326	0.673375	11.3079	-4.05885	0.0115664		21407125	1.27359	160.766	-6.94167	2.49393e-18		21401892	0	7.18042	-5.3339	0.00204602
21384410	0.35678	5.82301	-3.99088	0.0474415		21394801	0.347072	43.2444	-6.94031	1.87906e-07		21395092	0	7.15931	-5.33039	0.00206548
21410834	0.633191	10.262	-3.95653	0.0450409		21392158	0	21.846	-6.91638	8.58872e-07		21404914	0.646697	25.22	-5.28902	1.79e-05
21399477	0.673375	10.369	-3.93275	0.0122396		21384564	0	21.5213	-6.89467	1.00672e-06		112092348	0	6.83195	-5.26237	0.0027084
21387901	9.91643	146.913	-3.89359	2.53e-25		21407781	0	21.5132	-6.89422	1.24805e-06		21408360	0	6.82273	-5.26075	0.00249573
21391693	10.4	152.099	-3.88851	5.79e-24		21409311	0.667713	77.8993	-6.89315	7.30808e-10		112094801	0.320655	13.2824	-5.2605	0.000510827
112093566	3.30177	47.9594	-3.82891	1.38e-08		novel.138	0	21.4671	-6.89161	8.93513e-07		21404616	0	6.81083	-5.25868	0.00263904
112092609	7.52426	102.933	-3.77928	3.1e-18		21406738	0	21.4304	-6.8895	1.23641e-06		21386496	0.644373	24.5795	-5.25201	2.31e-05
21388561	6.14979	83.9462	-3.7748	2.74e-15		21391981	0	21.154	-6.87016	9.99707e-07		21409916	2.24691	85.2282	-5.23965	1.21e-15
112092908	1.68484	23.0277	-3.76176	0.0001238		21403239	3.03538	344.407	-6.86654	1.21744e-39		21409884	0.645959	24.2375	-5.23141	2.73e-05
112092497	1.93976	25.5977	-3.66981	6.87e-05		21408977	0	20.0908	-6.79638	2.10509e-06		21391957	0.32298	12.92	-5.22101	0.000651744
21409613	10.1034	123.125	-3.59658	6.25e-21		21389091	0.347072	38.6151	-6.7766	4.35488e-07		21405663	23.8638	886.759	-5.21592	2.21e-129
21400397	5.53809	66.1911	-3.59542	2.37e-11		21390405	5.36765	572.968	-6.74872	2.70396e-14		21407309	0.643635	23.5626	-5.19116	3.23e-05
21394852	3.38214	39.9241	-3.55439	3.04e-07		21402947	0.347072	37.3432	-6.72789	6.53436e-07		21394877	4.18003	149.603	-5.15807	2.73e-27
21384474	0.983741	11.6557	-3.52791	0.00912344		21397863	0.316156	36.5517	-6.69768	6.15284e-07		21410425	109.824	3810.39	-5.11655	5.32e-34
21395356	104.124	1194.01	-3.52609	1.34e-65		112095084	1.27359	135.619	-6.69668	5.05736e-17		21389930	0	6.1656	-5.11371	0.00544635
21386441	43.4295	499.719	-3.51534	2.27e-63		21386597	0.316156	36.4668	-6.69453	2.42081e-06		21392946	0.320655	11.9031	-5.10267	0.00103241
21384358	2.07558	23.0346	-3.48798	0.00015712		21388114	4.75328	486.806	-6.69371	2.85144e-12		21396754	73.1162	2511.91	-5.10223	3.7e-48
21393261	1.02393	11.3308	-3.47113	0.0100016		21386774	7.12891	728.059	-6.67124	2.62831e-11		21387933	0.646697	21.7771	-5.07761	5.93e-05
21400419	3.78815	41.4802	-3.46289	1.85e-06		21394226	0.347072	35.6758	-6.6619	9.10422e-07		21384832	8.73657	291.804	-5.06222	0.000380634
21410788	24.1974	251.274	-3.38944	1.05e-34		21407679	2.93414	297.794	-6.65941	7.01586e-37		21406451	0	5.8085	-5.02817	0.0059937
21392809	136.284	1419.46	-3.38238	4.24e-19		novel.951	0	18.1176	-6.64681	4.12102e-06		21392469	0	5.79186	-5.02475	0.00646639
21400418	82.575	855.262	-3.37468	2.59e-113		21403786	4.61616	446.025	-6.60359	2.06615e-53		21407673	81.4864	2632.44	-5.01342	1.47e-60
21387900	303.13	3051.74	-3.33136	9.18e-223		21399231	0.347072	33.9622	-6.59107	1.28283e-06		21384926	103.444	3296.18	-4.99341	0
21409452	1.34675	13.2411	-3.28795	0.0077696		21410381	1.61618	156.033	-6.57622	6.24823e-19		21395283	74.1172	2351.93	-4.98745	7.66e-244
21399562	2.70877	26.4878	-3.28526	8.57e-05		21387014	1.73536	160.441	-6.57195	2.35185e-08		112092978	0.32298	10.9301	-4.97857	0.0020006
112095150	1.03016	9.67219	-3.24031	0.0334788		novel.611	0.636796	61.8105	-6.56269	9.38308e-09		21385179	0	5.47786	-4.94318	0.00946079
21393043	6.64519	61.498	-3.23016	1.39e-07		21412494	0.347072	33.2255	-6.55984	1.35757e-06		21384955	0	5.45408	-4.93793	0.00787485
21401905	0.989971	9.35752	-3.2123	0.0314026		21407269	0.347072	32.1981	-6.51469	1.48274e-06		21406861	1.61479	49.401	-4.93725	3.96e-10
21394262	1.73126	15.7658	-3.20292	0.00680244		21407693	0.632311	59.6867	-6.51322	1.20757e-08		112090310	0	5.44873	-4.93677	0.00814377
21403105	44.4777	402.212	-3.16937	2.9e-44		21406633	0.316156	31.267	-6.47179	2.06245e-06		21396714	0	5.44279	-4.93547	0.00816753
21405271	6.10618	53.3973	-3.12589	1.13e-06		21391062	0.663227	58.0968	-6.47015	1.43898e-08		novel.1123	0	5.43951	-4.93475	0.00853165
21407921	3.65232	31.7553	-3.09837	4.58e-05		112092447	0	15.7845	-6.4477	1.27263e-05		21401441	0	5.42822	-4.93222	0.0094728
21384669	4.36588	37.3135	-3.08249	2.65e-06		21404844	0	15.7599	-6.44578	1.57652e-05		112092336	0	5.42495	-4.93141	0.0111571
21400487	32.214	274.946	-3.07826	6.3e-25		21402052	0.694144	56.2617	-6.4193	3.07952e-08		21388765	0.320655	10.5656	-4.93016	0.00177934
21388622	86.2704	723.728	-3.07467	4.03e-68		21398745	0.641282	55.4811	-6.4062	2.71081e-08		21388245	0.643635	19.0888	-4.88792	0.000141683
21410719	2160.41	18064.1	-3.06351	9.15e-218		21393738	0.320641	29.8214	-6.40427	2.97179e-06		21387972	0.32298	10.1847	-4.87816	0.0026483
21405404	68.39	562.487	-3.04178	1.98e-09		21386162	0	15.1555	-6.38846	2.38203e-05		112092048	0.320655	10.1827	-4.87793	0.00258767
21391314	2.07558	16.5371	-3.0086	0.00328382		21397359	0.347072	28.8414	-6.35587	3.5502e-06		112095150	0.32298	10.1761	-4.87709	0.00294492
21390992	1788.56	14012.7	-2.97047	1.73e-114		21410928	3.62829	294.038	-6.35049	8.77383e-40		21385960	0	5.13801	-4.85072	0.0144455
112092552	1.33429	10.3673	-2.93933	0.026881		21412606	0	14.4692	-6.32176	2.69811e-05		21401839	0	5.11362	-4.84493	0.011689
21387529	6.24884	46.8946	-2.92319	4.1e-06		21390163	0	14.4252	-6.31804	2.2141e-05		21385565	0	5.08302	-4.83764	0.0139812
21389405	6.52806	49.2009	-2.92265	7.54e-08		21388322	4.25163	334.228	-6.29533	1.54271e-42		21401070	0.320655	9.89393	-4.83512	0.00252978
21406490	46.1273	345.87	-2.91409	6.61e-36		21400589	0	14.0961	-6.28463	2.4901e-05		21388383	1.28727	36.47	-4.82196	6.77e-08
21405302	125.313	943.619	-2.90872	5.87e-70		novel.818	0	14.0899	-6.2841	3.10098e-05		21394448	56.4344	1574.35	-4.80205	7.14e-214
21405692	3.07801	23.0151	-2.90674	0.000497424		21384902	0	14.0821	-6.28342	3.24322e-05		21386044	5.15446	139.649	-4.75844	7.8e-26
112093713	1.40843	10.0441	-2.86381	0.0338133		21388965	0	14.0542	-6.28078	0.000113208		21402037	1.92858	52.0821	-4.75172	1.03e-10
112095303	44.2885	322.907	-2.86254	2.59e-25		21395166	0	13.7949	-6.2529	3.28185e-05		21401228	0	4.76574	-4.74365	0.0147355
21412618	47.6285	343.019	-2.84807	4.31e-37		21401736	0	13.7846	-6.25202	4.32753e-05		21404595	0	4.76187	-4.74265	0.0177899
21392581	3.15215	22.2662	-2.84451	0.0015035		21403555	0	13.4505	-6.21656	3.91569e-05		21395924	0	4.75178	-4.74007	0.017892
112091520	27.68	197.879	-2.84121	1.17e-27		21410116	6.26326	456.749	-6.19718	1.18362e-61		21403098	1.93555	51.5668	-4.73576	1.84e-10
112094756	4.05552	29.0835	-2.83663	8.96e-05		21401980	54.2016	3967.97	-6.19582	2.08517e-16		21386148	0.320655	9.21749	-4.73277	0.00365472
21402603	5.18131	36.2808	-2.82062	9.97e-06		21408968	50.4695	3649.33	-6.17041	0		21391661	0.646697	17.1332	-4.7297	0.000450752
21387978	1.73126	12.0311	-2.811	0.018693		novel.200	0.632311	46.0403	-6.13925	1.72896e-07		112090824	5.49571	142.564	-4.70039	8.16e-25
21383857	1.38071	9.42107	-2.7822	0.0421405		novel.868	0	12.7392	-6.13888	5.35509e-05		21397065	0.645959	16.7595	-4.69861	0.000674363
21399045	129.29	885.796	-2.77927	4.35e-79		21399392	1871.6	131847	-6.13838	1.29944e-47		21401934	0.967352	24.5197	-4.66407	9.86e-06
21387629	26.7517	177.562	-2.73673	5.95e-23		21406320	10.0092	713.39	-6.13784	6.80648e-92		novel.178	0	4.45977	-4.64632	0.0341642
21387898	10.2746	69.0265	-2.72848	3.54e-08		21392429	0	12.7063	-6.13562	9.33694e-05		21398985	0	4.42796	-4.63744	0.0213908
21390614	13.8965	88.4882	-2.68655	4.03e-11		21392659	0.316156	24.1849	-6.10145	1.2094e-05		112095316	0	4.42529	-4.63672	0.0205619
112092749	11.2466	71.4227	-2.6724	0.0302117		21393656	281.259	19229.2	-6.09487	7.91624e-39		112092049	0	4.41132	-4.63292	0.022304
21405007	2.37691	14.8911	-2.64573	0.0121191		21384474	0	12.078	-6.06182	7.48836e-05		21409208	0	4.4027	-4.63047	0.0256907
21388514	1.6973	10.3942	-2.61149	0.0349138		21391551	0	12.0764	-6.06165	8.00216e-05		21403753	1.93935	47.8399	-4.62687	8.23e-10
21390449	6.70261	41.1455	-2.60479	4.73e-06		21397603	0.320641	23.1119	-6.03665	1.80367e-05		21393478	0.32298	8.55709	-4.62487	0.00583151
21401234	1.72503	10.3776	-2.59991	0.037725		21410363	17.1606	1114.19	-6.03034	1.77856e-139		112090694	0.323718	8.54312	-4.6229	0.00528821
21391502	246.442	1488.17	-2.59177	1.26e-90		21405819	0	11.732	-6.02009	9.6811e-05		21408797	0.646697	15.7209	-4.60616	0.000573363
21390646	10.984	65.6859	-2.58677	8e-08		21398282	2.02508	126.896	-6.00976	1.50265e-19		21406964	12.2482	290.004	-4.56507	2.55e-54
112090560	2.09427	12.2954	-2.57499	0.0244415		novel.129	0.316156	22.4606	-5.99523	1.97299e-05		21398536	0.320655	8.16819	-4.55926	0.00638245
21385728	5.13832	30.118	-2.55659	0.000250132		21406841	0.641282	41.6081	-5.99184	3.21678e-07		21390222	1.29192	30.2697	-4.55269	2.23e-06
112093995	17.1615	100.437	-2.55563	2.19e-12		21388632	0	11.4308	-5.98187	0.000123015		21384952	1.29107	30.0356	-4.54092	9.78e-07
21389929	2.28408	13.6599	-2.54717	0.0269658		21384900	0	11.4288	-5.98165	0.000116155		21401956	0.961965	22.4651	-4.53961	7.82e-05
21398199	4.92982	27.5389	-2.50661	0.00113221		novel.164	0	11.421	-5.98082	0.000111896		21384260	4.1946	97.3397	-4.5376	4.54e-19
21395310	3.4161	19.1299	-2.48812	0.00376943		21396752	11.2065	702.971	-5.9782	5.87636e-10		21396888	0	4.09672	-4.5247	0.0291327
21392134	21.0466	118.102	-2.48733	2.42e-07		21398452	4.6341	288.714	-5.97548	1.0181e-42		21388954	0	4.08603	-4.52157	0.0293447
novel.976	2.485	13.5963	-2.48385	0.0273163		novel.437	0	11.0597	-5.93497	0.000186026		21390408	0	4.08483	-4.52121	0.0325761
21395792	4.85568	26.5954	-2.46805	0.000786012		21385766	0	10.7303	-5.89122	0.000204763		21402806	0	4.08276	-4.52063	0.0277193
21397376	18.9801	102.892	-2.43793	0.0113265		21390474	3.94893	232.88	-5.88861	4.36935e-35		112092252	0	4.08216	-4.52043	0.0304853
21383677	6.29807	33.6233	-2.43704	0.000282244		21399395	0	10.7072	-5.88859	0.000222026		21409679	0	4.07414	-4.51809	0.0295701
21394548	32.7267	178.473	-2.43323	6.64e-12		21401477	0	10.7011	-5.88784	0.000267716		novel.941	0	4.06819	-4.51627	0.0329722
21399256	18.2575	98.38	-2.42508	2.16e-11		21393971	0.663227	38.661	-5.88187	6.40526e-07		21395233	80.5158	1822.16	-4.49992	3.26e-52
21411915	14.6453	77.5082	-2.40415	9.73e-10		21393155	4.49746	262.83	-5.84484	8.61454e-38		21384564	0.965028	21.8579	-4.4981	3.59e-05
21400454	23.6272	121.795	-2.37038	1.22e-13		21391568	0	10.385	-5.84425	0.000287901		21404255	0.320655	7.82506	-4.49744	0.00799589
21411857	3.31423	17.1956	-2.35429	0.0114541		21383890	0.988353	56.0797	-5.83445	9.85154e-10		21388472	0.323718	7.81911	-4.49653	0.00844805
21395603	49.7477	254.1	-2.35341	6.99e-28		21386441	9.02984	517.705	-5.82242	7.56176e-73		21391289	2.25462	50.1643	-4.47412	1.23e-10
112091239	3.15215	15.8666	-2.3488	0.0440392		21398604	0	10.0892	-5.80168	0.000283639		21402224	0.647435	14.2901	-4.46928	0.00114721
112094908	4.37211	22.0952	-2.32766	0.0044392		21406379	0	10.0777	-5.8003	0.000290086		21388965	0.643635	14.2646	-4.46862	0.00200724
21397116	7.64482	37.5623	-2.3124	0.000102965		21403606	0	10.0678	-5.79911	0.000266494		21389527	1.61025	35.3967	-4.45723	9.48e-08
21404249	23.9999	118.11	-2.30461	1.11e-12		21402007	0	10.0654	-5.79882	0.000290746		21395346	0.320655	7.50631	-4.43666	0.00990872
112092791	5.8145	28.4937	-2.29677	0.000712463		novel.253	0	10.0621	-5.79842	0.000281041		21411938	1.93777	41.6164	-4.4264	7.1e-09
21395138	5.83319	28.504	-2.29474	0.00127045		21389271	0	10.0403	-5.79577	0.000322995		21390203	222.461	4760.56	-4.41947	1.14e-96
21390415	15.6942	76.888	-2.29394	3.45e-08		21408126	0.663227	35.5639	-5.76183	1.21198e-06		112094559	0	3.75152	-4.39794	0.0376699
21410644	39.4801	192.77	-2.28758	2.75e-18		21403234	8.98296	479.009	-5.75657	1.67077e-69		21399411	0	3.73695	-4.39331	0.0397259
21385398	4.15592	20.7793	-2.28624	0.0268934		21406087	0	9.73502	-5.75055	0.000330195		112090451	0	3.73695	-4.39331	0.0397259
21411206	4.16984	20.0475	-2.28126	0.00725004		21398392	0	9.70954	-5.74734	0.000420053		21410176	14.8109	306.357	-4.36925	6.37e-48
21392462	21.1997	103.374	-2.27769	1.02e-10		21395233	34.1023	1794.17	-5.72782	2.87891e-166		21389091	1.93397	39.213	-4.34121	1.65e-08
21399391	2575.1	12361.6	-2.26351	5.95e-74		112092192	4.5633	242.085	-5.72367	1.03062e-34		21409382	34.798	704.61	-4.33911	4.85e-102
112093280	11.09	53.093	-2.25016	5.34e-06		21398459	1.62515	86.3265	-5.72146	1.40412e-14		21397663	1.29181	25.4989	-4.30545	8.9e-06
112092000	36.8102	173.428	-2.24256	4.31e-14		21391490	0.983868	51.5978	-5.71532	4.03241e-09		novel.856	0.970415	19.1281	-4.30413	0.000119542
21395282	22.3656	105.74	-2.23789	1.6e-10		21387023	0	9.41244	-5.7016	0.000413695		21395102	2.90427	57.2121	-4.3012	1.43e-11
21387335	18.2686	85.5887	-2.23691	3.96e-09		21399446	0	9.40835	-5.70108	0.000429026		21402936	0.32298	6.81351	-4.29737	0.0146312
21410286	17.961	84.1098	-2.23632	2.61e-07		21398777	9.17946	465.442	-5.66579	3.69061e-64		21390605	62.5398	1226.92	-4.29389	7.01e-198
21395988	4.17607	19.3507	-2.22856	0.0135962		21395852	0	9.08168	-5.64987	0.000578936		21402423	195.672	3830.95	-4.29103	0
21402424	25.3341	118.435	-2.21293	8.89e-10		21404088	0	9.06234	-5.64728	0.000513025		21394526	122.401	2360.82	-4.26939	8.64e-58
21409202	4.02779	18.7545	-2.20911	0.00955077		novel.622	0.641282	32.7143	-5.64676	1.39206e-05		novel.333	0.646697	12.253	-4.24759	0.00250287
21398866	31.4355	144.114	-2.19217	4.67e-12		21404291	2.58259	129.136	-5.62628	1.35094e-20		21398777	25.1572	472.632	-4.23214	8.76e-78
21404277	41.3458	185.981	-2.17631	1.04e-14		21391384	0	8.75706	-5.59706	0.0007785		21394677	4.50607	83.8373	-4.21567	5.58e-17
112093839	2.76764	12.3034	-2.16485	0.0474335		novel.890	0	8.72953	-5.59323	0.000886509		21392590	2.89973	53.837	-4.21383	1.54e-11
21403908	5.03926	22.6129	-2.157	0.00534055		21391974	0	8.72824	-5.59305	0.000683065		21385587	11.6006	214.529	-4.20844	8.68e-36
21384011	4.90344	22.1061	-2.15043	0.0290193		21399628	0	8.71391	-5.59102	0.000957967		21396995	8.05102	148.001	-4.19878	2.25e-29
21392443	120.657	536.284	-2.14985	1.02e-36		21392260	0.694144	31.4951	-5.57903	4.81641e-06		112094775	8.69857	156.716	-4.17044	1.89e-29
21404871	15.8639	69.5997	-2.14286	2.45e-07		21408808	28.6304	1355.18	-5.56662	0.000214086		21390210	9.02007	162.354	-4.16919	2.38e-27
21410070	29.5027	128.779	-2.13646	1.11e-09		112091382	0.694144	30.5047	-5.53333	5.1705e-06		21403396	0.961965	17.3586	-4.16765	0.000326634
21409777	25.8434	113.622	-2.13589	9.28e-11		21407788	1.97671	90.9867	-5.53239	1.05168e-15		21393812	1.29413	23.1814	-4.16669	2.64e-05
21390693	25.9461	110.489	-2.09566	3.58e-05		21385502	0	8.36532	-5.53232	0.00249879		21409381	30.8916	551.182	-4.15679	7.08e-16
21391660	28.679	122.12	-2.09235	1.09e-11		112090608	0.663227	29.9316	-5.51193	8.60499e-06		112090745	5.15288	91.9642	-4.15649	5.44e-18
21394080	8.69366	36.5199	-2.08393	0.00172373		21387650	0.663227	29.8999	-5.51101	5.0053e-06		21395657	0.320655	6.1549	-4.14971	0.0225883
21400022	56.5626	238.769	-2.08214	4.67e-20		21397360	14.6448	655.163	-5.50213	1.55097e-89		21384410	0.320655	6.12517	-4.14404	0.021704
21387935	323.575	1358.97	-2.07112	1.59e-69		21390222	0.694144	29.8149	-5.49872	9.30864e-06		112094816	0.32298	6.1225	-4.14354	0.0215657
21391267	98.0046	405.043	-2.05258	2.1e-19		112092345	1.04122	44.2346	-5.48346	3.40783e-08		21397345	28.0157	495.146	-4.14215	1.07e-81
112091564	5.83319	23.954	-2.04422	0.00424046		21398676	0	8.04775	-5.47621	0.00116469		21392882	2.25071	39.5847	-4.1331	2.76e-08
21406170	56.3651	231.846	-2.04283	1.38e-20		21401561	0	8.03919	-5.47484	0.00174434		21389432	12.2548	214.211	-4.12765	2.69e-41
21412056	15.2016	62.4969	-2.03466	4.05e-06		21409730	0	8.02599	-5.47287	0.00139461		112093417	4.84289	84.462	-4.12607	3.6e-17
21407538	63.8832	260.301	-2.02908	4.58e-21		21387898	1.70444	71.5418	-5.44246	1.13151e-12		21412494	1.93397	33.7384	-4.12443	1.91e-07
21396767	69.5472	282.793	-2.02474	1.6e-22		21401097	2.6574	113.384	-5.43376	7.00147e-20		21407204	49.6135	862.006	-4.11804	2.76e-129
21394538	15.1815	61.2795	-2.02186	8.46e-06		21387900	73.0542	3162.07	-5.4336	5.0675e-42		21400968	13.8505	239.509	-4.11079	1.65e-42
21399392	31342.2	127242	-2.02143	2.25e-56		21394265	0	7.75567	-5.42166	0.00186175		21388375	1.9385	33.3879	-4.10862	4.78e-07
21396351	4.08947	16.5239	-2.01543	0.0207812		21389401	0.347072	15.0777	-5.42037	0.000278588		21402251	8.36334	143.998	-4.10499	2.77e-07
21400383	5.15358	20.6683	-2.01127	0.0119087		21386622	0	7.71532	-5.41526	0.0015217		112091452	2.8859	49.4774	-4.09837	0.0300499
21403701	109.011	438.165	-2.00381	3.5e-32		21406161	0	7.7129	-5.41488	0.00143939		112091549	0.64131	10.9513	-4.08679	0.00560064
21404908	17.5626	69.6495	-1.98225	8.74e-07		21404255	0	7.70546	-5.41371	0.00150867		21390297	15.1469	256.737	-4.08289	1.98e-46
21383807	14.8248	58.0957	-1.97772	5.83e-05		112092756	0.952952	41.3292	-5.39987	7.50533e-08		21400487	17.1009	289.362	-4.08123	7.37e-52
21399756	84.2937	332.099	-1.97473	2.23e-26		21401096	4.60767	190.979	-5.37978	4.71536e-32		112092539	0.644373	10.9141	-4.08109	0.00422412
21398446	145.021	564.357	-1.96453	1.3e-29		112094335	4.04568	164.062	-5.37562	2.71579e-24		21398197	0.64131	10.8796	-4.0789	0.00511916
21384051	17.0798	66.1187	-1.95949	0.00531882		112090658	0.979383	40.7127	-5.3734	1.06665e-07		21401477	0.647435	10.863	-4.07392	0.00593369
21401019	13.3914	51.5575	-1.95071	3.72e-05		21403338	15.35	633.571	-5.36448	6.18612e-84		21399370	248.532	4169.79	-4.06828	0
21398045	25.3065	97.1832	-1.94453	4.82e-09		novel.1203	0	7.41952	-5.35769	0.00225557		21395232	53.7883	902.404	-4.06736	2.16e-117
21412093	55.6953	212.045	-1.93648	2.23e-12		novel.447	0.316156	14.433	-5.3569	0.000333127		21400587	76.3789	1280.66	-4.06722	4.75e-150
21411203	21.8683	82.6423	-1.92058	9.84e-08		21395346	0	7.39199	-5.35312	0.00204801		21409719	0.32298	5.81237	-4.0672	0.0329246
21398445	423.39	1595.9	-1.91291	6.32e-61		21388578	0	7.38865	-5.35257	0.00192297		21405464	7.40115	124.096	-4.06603	4.09e-20
21390795	14.655	55.1195	-1.91192	6.18e-05		21410215	0	7.37842	-5.35088	0.00192918		21386509	0.320655	5.79126	-4.06287	0.0258381
21386089	6.27315	23.3143	-1.90779	0.020597		novel.1061	1.0103	40.1921	-5.35014	1.09815e-07		21408732	0.323718	5.78384	-4.06121	0.0439327
21394384	17.7005	65.532	-1.89947	3.11e-05		112090609	0.663227	26.567	-5.34001	1.4154e-05		112092447	0.96429	16.0331	-4.05171	0.00050308
21396121	328.599	1222.4	-1.89697	1.41e-42		21406514	23.4921	931.376	-5.31028	3.02161e-09		21385051	1.93703	32.0552	-4.04993	3.41e-07
21402580	161.013	596.643	-1.89143	9.54e-30		novel.403	0.347072	13.8434	-5.29555	0.000720138		21400495	7.10131	115.231	-4.02148	4.3e-23
21393351	14.6488	54.1698	-1.88705	0.000136734		21383974	0	7.08095	-5.29038	0.00320796		21391146	0.96429	15.6864	-4.02026	0.000562036
21389906	13.2043	49.2799	-1.88258	0.000601034		novel.741	0	7.05956	-5.28662	0.00258448		21410438	1.93006	31.0915	-4.00662	9.1e-07
21405232	463.664	1705.23	-1.88023	1.88e-44		21408978	0	7.03074	-5.28165	0.00260956		21388901	7.08747	113.179	-3.9962	8.86e-23
21409376	409.355	1492.62	-1.86812	7.58e-39		21396382	3.18398	126.54	-5.27959	3.74206e-20		21396919	29.6325	471.47	-3.99099	1.21e-73
112092035	8.94515	32.3372	-1.86193	0.00207876		21395677	0.316156	13.4295	-5.25287	0.000484531		21401936	0.647435	10.2602	-3.9897	0.00702585
21405694	9.18761	33.371	-1.86069	0.00156598		21398946	1.04122	36.8895	-5.22049	2.28807e-07		112091100	2.57454	40.8302	-3.9856	1.52e-08
21407507	291.614	1049.84	-1.84997	7.19e-35		21408360	0	6.71765	-5.21518	0.00293158		21400420	0.968939	15.3109	-3.98432	0.000818486
21402907	70.0552	251.758	-1.84496	7.58e-15		21404616	0	6.70612	-5.21311	0.00316301		21392871	0.644373	10.1913	-3.98335	0.00670147
21387798	43.7752	157.241	-1.84273	4.38e-12		21406861	1.33094	48.6496	-5.21247	1.78968e-09		21384020	7.10227	111.661	-3.97624	2.51e-20
21403302	21.183	75.6967	-1.84016	2.7e-06		21409211	0	6.69793	-5.21162	0.00337112		21402286	0.323718	5.44606	-3.97442	0.0342588
112090737	19.1706	67.9618	-1.83848	8.69e-05		novel.265	0	6.68807	-5.20976	0.00412408		21405740	6.76925	106.207	-3.971	2.93e-20
21391281	132.13	472.639	-1.83494	1.12e-16		21406264	2.28389	82.1083	-5.16345	5.98519e-14		21404198	0.323718	5.42822	-3.97055	0.0363306
21396192	24.9095	88.7061	-1.83429	7.5e-08		21392232	1.99417	69.9668	-5.15077	1.23227e-12		21393799	0.64131	9.9091	-3.94288	0.00817007
21406336	16.0447	56.9966	-1.83093	2.99e-05		21400981	0	6.37907	-5.14067	0.00420083		21393412	10.9694	168.468	-3.94145	3.99e-32
21389098	306.661	1074.54	-1.81155	4.89e-34		21394962	0	6.36997	-5.13893	0.00502677		21410669	26.7599	409.949	-3.93727	2.65e-74
21386949	17.6741	61.8224	-1.80587	1.73e-05		21387247	0.694144	22.8029	-5.11146	4.6678e-05		novel.390	0.646697	9.87937	-3.93661	0.00713886
112094629	8.14499	28.4771	-1.8041	0.00446711		112094173	0.320641	12.0937	-5.10156	0.000872061		21399806	2.89667	44.3929	-3.9354	2.51e-09
21385260	59.5642	208.202	-1.80246	8.35e-14		21409056	0.979383	33.2086	-5.08013	5.63198e-07		21398696	12.5687	192.318	-3.9347	1.32e-31
21407908	886.639	3078.7	-1.79693	4.26e-51		21384832	8.76356	287.34	-5.06812	1.19664e-44		21395460	4.18235	63.7628	-3.9278	5.3e-13
21401318	180.777	623.323	-1.78746	5.5e-27		21389930	0	6.06841	-5.06779	0.00698586		112091457	0.966614	14.6279	-3.91939	0.000936421
21395009	4.80926	16.5193	-1.7869	0.037559		21406113	0	6.05074	-5.06415	0.00512556		21398921	10.3011	155.906	-3.91802	2.08e-26
21399797	15.0562	51.1398	-1.77811	0.00161978		21385813	0.347072	11.753	-5.06045	0.00110383		21385452	4.18161	63.0765	-3.91227	7.01e-13
21391979	35.2216	118.119	-1.75318	3.69e-07		21392875	8.03749	268.895	-5.04296	2.34162e-43		21403338	42.8666	643.458	-3.90735	1.18e-103
21392512	443.544	1494.12	-1.75255	5.06e-48		novel.920	1.36186	43.3632	-5.04051	1.54677e-08		21393770	191.785	2876.57	-3.90663	5.65e-228
21404112	10.9313	36.6945	-1.74884	0.00238725		21410373	0.632311	21.1696	-5.02111	8.11842e-05		21405158	0.645959	9.58261	-3.89171	0.0108911
21385243	23.7941	80.3315	-1.74593	3.88e-06		21394536	0.347072	11.4247	-5.0194	0.0011975		21410238	1.6094	23.8614	-3.88818	1.76e-05
21384383	192.429	632.559	-1.72053	1.36e-21		novel.435	0.347072	11.3873	-5.01546	0.0015247		21390405	39.3415	581.883	-3.88659	1.17e-94
21402118	21.6909	71.1094	-1.71995	4.52e-05		21399165	1.35737	42.3087	-5.0066	1.33505e-08		21384401	6.12953	90.2988	-3.88148	7.54e-17
112092545	6.26411	20.4246	-1.71935	0.0294215		21409560	1.04122	31.5386	-4.99298	1.23768e-06		21394141	70.2983	1021.61	-3.86135	1.09e-146
112090255	18.9205	61.9763	-1.71793	6.54e-05		21384402	1.04122	31.5728	-4.99281	1.91874e-06		novel.403	0.969677	14.0641	-3.85944	0.00195586
21406081	300.843	990.312	-1.71694	2.09e-15		21397534	2.05151	62.9426	-4.98926	3.87275e-11		21404602	2.25462	32.6977	-3.85726	3.4e-07
novel.400	13.1163	43.1623	-1.7102	0.00085281		21406451	0	5.7183	-4.98248	0.00700214		21396200	0.969677	13.9687	-3.85139	0.00122531
21392435	377.427	1230.93	-1.70703	2.36e-31		21396689	13.0666	413.181	-4.98012	6.00478e-67		21410389	97.6312	1408.6	-3.85017	1.88e-160
21407570	301.929	983.851	-1.70641	1.39e-32		21386509	0	5.70268	-4.97917	0.00673654		21399562	1.94009	27.8797	-3.84867	4.67e-06
21401060	36.9714	120.414	-1.70179	3.44e-08		21397076	0	5.6932	-4.97713	0.00812774		21391051	4.17855	60.3139	-3.84817	6.67e-12
21404195	220.569	712.828	-1.69227	3.9e-32		21406709	0.347072	11.0655	-4.97384	0.00159839		21404622	3.22957	46.4606	-3.84776	1.59e-09
21393980	44.1198	141.967	-1.68647	0.0438576		21403613	2.05151	62.0301	-4.97067	1.19748e-11		21395852	0.64131	9.22344	-3.8396	0.0115243
21409614	2511.07	8004.75	-1.67259	7.44e-83		21404267	10.7213	336.232	-4.96183	5.69536e-57		novel.90	24.489	350.123	-3.83734	4.96e-52
21404468	16.3226	51.5374	-1.66986	0.000848022		21404894	3.4398	105.584	-4.95765	0.000114883		21393797	11.6197	165.907	-3.83697	1.97e-31
21400506	51.312	162.199	-1.65959	3.46e-11		novel.744	0.667713	20.1418	-4.93899	0.000116866		21386532	0.643635	9.16845	-3.8313	0.0112651
21387286	17.9748	56.6499	-1.65397	0.000129432		21387302	0.667713	20.0999	-4.93651	0.000116909		21404096	0.965028	13.6573	-3.8199	0.0014536
novel.595	84.5744	264.658	-1.65058	2.16e-13		112092978	0.347072	10.7585	-4.93266	0.00245394		21408968	262.468	3706.15	-3.81965	3.68e-22
21402061	173.651	543.916	-1.65034	3.12e-22		112092539	0.316156	10.7463	-4.93123	0.001627		21392916	209.856	2954.77	-3.81541	4.05e-180
21402649	19.404	60.2599	-1.64471	0.000350403		21384426	0.316156	10.7446	-4.93106	0.00176055		21400479	9.35191	131.291	-3.8114	3.24e-24
21409884	7.37598	23.0312	-1.63241	0.0225735		21391469	8.16217	246.39	-4.92828	9.68498e-09		21405160	16.7732	233.802	-3.80148	4.42e-41
112092722	8.35215	25.6017	-1.62967	0.0193711		21408104	0.636796	19.777	-4.92248	0.000132749		21392918	101.243	1409.66	-3.79931	6.65e-144
21404790	2018.07	6241.68	-1.62932	6.52e-46		21396638	0	5.40112	-4.89947	0.0124338		21388322	24.4838	339.392	-3.79231	2.31e-51
21405677	41.4467	128.603	-1.62782	2.08e-08		21385179	0	5.39331	-4.89766	0.0117377		21389526	75.1084	1037.99	-3.78859	6.11e-36
112095278	16.6205	50.8904	-1.62409	0.000901918		21393613	0	5.38754	-4.8963	0.0101368		21400676	1.93397	26.6388	-3.78303	6.67e-06
21404355	19374.4	59627.5	-1.62184	4.63e-09		21409720	0	5.38011	-4.89462	0.00988308		novel.890	0.647435	8.86367	-3.77926	0.0149626
21409980	37.8015	116.229	-1.62085	7.15e-07		21400194	0	5.3723	-4.89285	0.00935075		21401326	26.1484	353.21	-3.75687	2.28e-60
112094846	46.6121	143.485	-1.61801	1.31e-08		21384955	0	5.37025	-4.89239	0.00898122		21389124	4.52064	61.0076	-3.75598	2.09e-12
21385569	102.039	311.931	-1.61357	5.36e-18		novel.785	1.65158	48.6524	-4.89173	4.99126e-10		21404694	117.282	1556.46	-3.72982	2.33e-135
21403962	15.8854	48.1951	-1.60964	0.00166094		112090310	0	5.36616	-4.89146	0.00937656		21408141	1.28875	17.0696	-3.72615	0.000405069
21406069	73.7524	224.542	-1.60539	6.25e-14		21396714	0	5.36039	-4.89017	0.00940175		21409290	0.643635	8.51132	-3.72332	0.0141349
21394708	12.7582	38.6145	-1.60531	0.00317806		novel.929	0	5.35835	-4.88969	0.00992356		21407256	1.28494	16.9968	-3.72225	0.000469806
112092984	9.10101	27.7957	-1.60526	0.0132752		novel.1123	0	5.35668	-4.88932	0.00999087		112092380	15.1609	198.491	-3.71095	8.53e-35
novel.249	811.677	2463.45	-1.60196	0.000725578		21393368	0	5.35425	-4.88869	0.0126965		21391062	4.50987	59.0065	-3.70858	1.16e-11
21403013	7.24162	21.6609	-1.58971	0.0321553		21387824	0	5.34887	-4.88749	0.0114333		21384398	2.90206	37.8455	-3.70496	6.05e-08
21387207	25.4782	76.5121	-1.58538	0.00013793		novel.684	0	5.34477	-4.88653	0.0119975		21394236	1.28494	16.7517	-3.69982	0.000515885
21386112	26.9649	80.9551	-1.58015	8.64e-06		112092336	0	5.3431	-4.88606	0.0145257		21389951	10.2933	133.061	-3.68978	7.08e-23
21409650	20.8076	61.9031	-1.57423	7.18e-05		novel.147	0	5.34272	-4.88603	0.0127611		21402722	5.15446	66.4296	-3.68718	1.58e-12
21384653	35.2438	104.58	-1.57203	3.4e-06		novel.249	86.9436	2552.74	-4.87441	3.86773e-20		21395621	14.4996	186.282	-3.68247	2.57e-34
112093709	8.22536	24.3264	-1.56858	0.0198556		112092506	0.983868	28.5171	-4.85947	2.3302e-06		21395747	5.16513	65.9533	-3.67636	3.38e-12
21400021	38.6792	113.853	-1.5611	5.55e-07		21388245	0.663227	18.7974	-4.84084	0.000161305		21384116	34.5402	440.72	-3.67371	9.69e-10
21407328	45.8785	135.221	-1.55891	5.26e-08		21407422	2.22206	64.1485	-4.81377	1.42719e-12		21395057	0.643635	8.20921	-3.66989	0.0178922
21399163	27.6619	81.0432	-1.5526	3.07e-05		21412472	1586.71	44543.9	-4.81105	7.42399e-21		21400552	23.534	299.346	-3.66902	4.24e-48
112090691	9.5257	27.8438	-1.54733	0.0121837		21392793	0	5.0765	-4.80964	0.019035		21399744	1.61479	20.4471	-3.66427	8.89e-05
21402901	7.92123	22.9556	-1.54288	0.0353027		21395444	2.88977	82.3723	-4.80948	1.63973e-15		21401561	0.645959	8.16077	-3.6615	0.0232601
21408191	25.328	73.6143	-1.54231	4.87e-05		21399216	3.87364	109.855	-4.80844	8.05173e-21		novel.879	5.80094	73.2888	-3.65873	1.72e-13
21386143	1175.57	3422.87	-1.54199	6.23e-06		21391370	0	5.06087	-4.80568	0.0155819		21397881	5.15509	65.146	-3.65863	2.95e-13
21401594	10.057	29.4108	-1.53975	0.0170041		21401909	0	5.05883	-4.80526	0.0185637		21397160	85.6123	1077.21	-3.65315	3.4e-15
21405452	19.5107	56.4188	-1.53482	0.00119484		21385960	0	5.05883	-4.80526	0.0185637		21385343	14.8017	185.777	-3.64782	1.19e-29
21407520	30.2806	87.5025	-1.53057	3.03e-06		21390644	3.55749	100.338	-4.80289	1.68321e-19		112095127	2.26222	28.2938	-3.64707	3.53e-06
21401211	24.4212	69.9252	-1.52375	0.000151784		21384271	0	5.03949	-4.80045	0.0128862		21398455	2.25388	28.254	-3.64685	4.22e-06
112093644	24.2868	69.2873	-1.52199	0.0005217		21401839	0	5.0341	-4.79916	0.0137702		21408763	14.5002	179.82	-3.63196	5.47e-32
21391232	464.548	1332.87	-1.52192	9.15e-29		112094361	0	5.02796	-4.79768	0.0122649		21410446	21.5703	266.394	-3.62492	3.39e-41
21403370	109.096	312.455	-1.51881	8.04e-16		21402770	0.632311	18.1078	-4.79737	0.000259346		21392232	5.81858	71.0609	-3.61221	1.03e-11
21403690	571.266	1624.99	-1.50851	2.48e-35		21407086	0	5.02553	-4.79692	0.0332073		21388558	2.90892	35.471	-3.61044	1.93e-07
112092540	60.1637	171.133	-1.50731	6.14e-09		21385565	0	5.00824	-4.79277	0.0173501		21401362	12.5633	152.861	-3.6043	4.04e-27
21386219	30.0812	85.3518	-1.50726	5.73e-05		21404622	1.73536	45.742	-4.78716	1.06504e-08		21384056	0.646697	7.83695	-3.60229	0.0199549
112091054	366.558	1039.9	-1.50611	8.96e-32		21399953	0.347072	9.71568	-4.78639	0.00285696		21383919	1.29413	15.6718	-3.60181	0.000816785
21399938	20.8755	58.9487	-1.50104	0.00034452		21385452	2.37216	62.1091	-4.75208	2.49639e-12		112093386	0.646697	7.82773	-3.60089	0.0212875
21384260	32.7039	92.5021	-1.50101	7.85e-06		21389432	7.82209	210.921	-4.74764	2.02186e-37		21410363	93.8085	1131.55	-3.59219	2.43e-143
21393656	6598.35	18557.6	-1.49196	1.18e-19		21385927	64.2821	1727.35	-4.74146	6.73009e-162		21396421	301.365	3629.82	-3.59026	9.84e-20
21409623	3091.1	8665.46	-1.48748	3.58e-32		21407181	0.952952	26.1293	-4.74088	8.50852e-06		21401096	16.1243	193.94	-3.58847	4.77e-35
21399751	28.5121	79.2645	-1.48386	0.00119691		21395621	6.87362	183.417	-4.73748	2.29279e-33		21388161	5.16575	61.7016	-3.57955	1.47e-11
21387518	77.6811	217.055	-1.48052	2.14e-12		21408002	0.347072	9.34995	-4.73165	0.0050469		21406841	3.55255	42.2539	-3.57396	8.65e-09
21405225	16.4813	45.6635	-1.4749	0.0048696		novel.860	0	4.71282	-4.70333	0.0189688		21392222	16.1052	189.02	-3.55213	4.04e-32
21406742	64.5192	179.084	-1.47453	7.06e-10		21388416	0	4.7091	-4.70234	0.0164944		112095046	4.19397	49.0353	-3.54825	1.22e-09
21384482	43.717	121.554	-1.47269	2.68e-07		21387471	0	4.70706	-4.70182	0.0170296		21392330	0.644373	7.5295	-3.54468	0.0275958
112095040	43.05	118.949	-1.4725	1.21e-06		21384116	16.7756	434.032	-4.70142	1.7066e-15		21383880	440.352	5136.38	-3.5439	0
21388371	258.574	715.884	-1.46959	5.66e-31		21403903	7.1374	186.7	-4.69844	2.36162e-33		21403991	0.967352	11.2534	-3.5401	0.00471775
21404662	103.98	287.533	-1.46828	3.68e-12		21401228	0	4.69348	-4.69833	0.0166265		21397152	0.967352	11.248	-3.53955	0.00442524
21405970	34.6867	95.9561	-1.46725	3.09e-06		21401273	5.25744	136.066	-4.69794	2.21742e-25		21393843	0.970415	11.2427	-3.53778	0.00491226
21409371	728.387	2012.29	-1.46702	9.88e-31		21390606	0	4.6881	-4.69689	0.0215281		21404263	3.87701	44.8446	-3.53452	4.44e-08
21389478	22.437	61.8281	-1.46194	0.000324796		21404595	0	4.6881	-4.69689	0.0215281		21400115	25.4347	294.404	-3.53169	4.74e-43
21393340	126.7	346.337	-1.45484	1.34e-09		21392257	0	4.68029	-4.69477	0.0247624		21401668	3.5441	40.6646	-3.51886	3.81e-08
21388051	21.5087	58.845	-1.45439	0.000595663		21390989	2.74566	68.14	-4.68611	3.33734e-12		112094307	1.28959	14.7132	-3.5111	0.00212018
21409230	184.095	503.39	-1.45422	2.49e-19		21385697	1.38829	33.9638	-4.67954	7.23537e-07		21408231	19.3132	219.627	-3.50576	5.36e-34
21402511	254.929	698.148	-1.45286	1.92e-28		21405663	34.2424	873.271	-4.67778	5.5171e-105		21408625	7.40813	83.1082	-3.48693	9.39e-16
21403899	120.967	330.195	-1.45197	2.42e-14		21400520	3.52208	90.6256	-4.66049	7.47669e-16		21402713	0.64131	7.16318	-3.47561	0.032588
21402525	654.874	1785.16	-1.44712	1.04e-50		21404927	12.3814	310.93	-4.64465	4.39059e-56		21387251	3.87553	43.0026	-3.47329	9.51e-09
21397312	19.4914	52.9528	-1.44483	0.00449086		21408796	0.316156	8.75334	-4.63468	0.00496668		21395751	9.99872	110.512	-3.46648	1.07e-19
112092796	13.5764	36.6882	-1.4439	0.0282207		novel.4	15.9209	396.938	-4.63141	5.7639e-66		21384925	17.7675	196.01	-3.46546	1.83e-27
21407242	9.16892	24.9523	-1.44275	0.0276551		21384158	1.38829	32.5749	-4.62059	7.47593e-07		21404409	6.44332	71.1499	-3.46479	0.00177664
21395136	46.6566	126.747	-1.44188	8.61e-06		21390338	169.251	4157.1	-4.61714	6.3191e-295		21390022	3.54728	38.8752	-3.45409	6.26e-08
21399261	963.386	2612.21	-1.43988	1.3e-16		21405902	1.6825	40.2579	-4.61287	2.94018e-08		112093713	0.969677	10.5683	-3.4486	0.00702155
21394813	101.815	272.683	-1.41956	2.29e-13		21395998	26.4547	647.641	-4.61118	7.247e-87		21390644	9.34357	101.898	-3.4463	3.69e-19
21407760	22.9975	61.295	-1.41888	0.000622148		21391143	8.98996	222.129	-4.60539	1.30146e-36		21392357	0.969677	10.5451	-3.44604	0.00753394
21398194	3157.24	8357.35	-1.40423	5.88e-25		novel.178	0	4.38858	-4.60023	0.0486865		21405694	3.22271	35.127	-3.44557	2.47e-07
21399072	11.8624	31.4023	-1.40203	0.0144726		21404017	0	4.36886	-4.59435	0.0218995		21409603	21.8808	238.388	-3.44406	4.33e-32
21399263	1457.2	3847.43	-1.40129	6.35e-22		21389282	0	4.36886	-4.59435	0.0218995		21406929	1.28727	13.9701	-3.43811	0.00193947
112091481	93.3462	246.372	-1.40084	1.36e-11		112094987	1.0103	23.8294	-4.59408	1.56876e-05		21404466	1.28959	13.9601	-3.4365	0.00195316
21393886	22.7688	59.9681	-1.3961	0.00100352		novel.121	0	4.36514	-4.59333	0.0229913		21384057	1.28727	13.9476	-3.43622	0.0019414
21401178	182.94	481.897	-1.39604	3.01e-19		21395578	0	4.36272	-4.59264	0.0299107		21397021	1.9347	20.8033	-3.42653	8.3e-05
21407519	33.1556	86.6602	-1.3923	0.00119831		112094372	0	4.36105	-4.5922	0.0219878		21397608	17.4123	185.639	-3.4141	1.17e-31
21385048	27.3119	72.0886	-1.3893	0.0129456		21398985	0	4.35938	-4.59173	0.0244252		21393877	3.8617	41.1362	-3.41186	8.21e-08
21401744	27.2677	71.1827	-1.38558	0.000182242		21401079	0	4.34785	-4.58839	0.0329987		novel.724	10.6101	112.925	-3.40917	1.93e-17
21398107	15.5764	40.7358	-1.38468	0.0120217		112092049	0	4.34543	-4.58781	0.0257443		112091578	0.961965	10.2198	-3.40386	0.010321
21402135	13.4842	34.9414	-1.38294	0.0170823		21403893	1.95877	47.1786	-4.58638	1.18556e-08		21412376	48.3429	511.3	-3.40251	7.64e-77
21387509	793.324	2061.89	-1.37887	1.39e-40		21409208	0	4.33762	-4.58549	0.031283		novel.210	0.646697	6.82065	-3.40149	0.0379267
21407422	23.9578	61.9082	-1.37848	0.00390687		21384742	0.694144	15.7952	-4.57684	0.000657052		21390507	0.645959	6.81351	-3.40073	0.0407116
112093753	38.4215	99.3093	-1.37358	5.29e-05		21399998	0.320641	8.40119	-4.57589	0.00571819		21387859	77.0314	808.262	-3.39086	4.93e-119
21395159	823.58	2129.9	-1.37183	1.46e-33		21398921	6.45671	153.522	-4.56628	7.92669e-07		21383890	5.48578	56.954	-3.3767	2.77e-11
21398530	210.765	546.387	-1.37139	1.6e-17		21390203	198.247	4687.39	-4.56438	6.07425e-203		21406783	3.54643	36.7939	-3.37508	1.08e-07
21409462	21.0098	54.4535	-1.37113	0.00119469		21395751	4.69145	108.823	-4.56177	1.88584e-19		21408246	4.83528	50.1301	-3.37362	5.98e-10
21402793	51.5793	133.462	-1.36986	2.14e-07		21390850	0.347072	8.11525	-4.52481	0.0118732		21387802	1.29266	13.2884	-3.36415	0.00267494
21389176	19.7157	50.5866	-1.35841	0.00267457		112094970	11.3063	256.958	-4.52257	1.7633e-40		21408808	134.058	1376.32	-3.35951	5.47e-101
21388951	940.003	2405.65	-1.35504	6.42e-32		21395057	0.316156	8.08234	-4.51956	0.00746936		21384158	3.22197	33.0828	-3.35914	5.66e-07
21394601	33.0095	83.9468	-1.35209	0.000112072		21405908	78.8336	1803.39	-4.51828	2.85562e-186		21405761	17.3899	178.251	-3.35646	1.57e-29
21385344	38.7304	98.8241	-1.35048	6.32e-05		21399107	1.70893	37.6449	-4.5099	1.31862e-07		21388374	62.2149	637.008	-3.35589	5.78e-88
21405832	184.496	471.341	-1.35012	4.35e-14		21406887	1.30002	29.4996	-4.49569	1.41754e-06		112091877	0.971153	9.85885	-3.34814	0.0146303
21390350	883.117	2251.34	-1.34996	2.55e-41		21386662	0	4.06153	-4.48781	0.043933		21401905	0.969677	9.84816	-3.34774	0.0120145
21402129	17.4885	44.7688	-1.34873	0.00587478		21398712	0	4.04629	-4.48303	0.038004		21396125	2.2561	22.8293	-3.33868	6.18e-05
21396554	12.1805	30.7358	-1.34683	0.0434817		112092651	1.30451	29.237	-4.48123	1.43871e-06		21412390	6.12255	61.6166	-3.33085	1.17e-10
21402154	270.472	684.592	-1.34139	1.92e-19		novel.967	0	4.03476	-4.47952	0.0391414		21406195	3.86856	38.8832	-3.32894	1.06e-07
novel.1242	78.2527	197.944	-1.34056	1.84e-07		21402806	0	4.02081	-4.47529	0.0306126		21392417	0.645959	6.48227	-3.32841	0.0485829
21394906	1628.14	4112.05	-1.33719	5.07e-38		112092252	0	4.01914	-4.47475	0.0349758		21392429	1.28262	12.9015	-3.3262	0.00629153
21400484	34.1879	86.4932	-1.33582	4.4e-05		21409679	0	4.013	-4.4729	0.0334012		21392415	0.646697	6.47098	-3.32598	0.0425093
21389481	364.188	919.252	-1.33509	1.47e-26		21393126	0	4.01133	-4.47232	0.0396701		112092756	4.19313	41.9708	-3.32335	3.59e-08
21390531	18.9897	47.964	-1.33437	0.0032514		21401956	1.04122	22.1287	-4.47136	0.000171246		21400932	5.14273	51.3498	-3.31894	0.00718431
21405919	40.3315	101.248	-1.33434	0.000100939		novel.941	0	4.00723	-4.47107	0.0388335		21402558	58.9939	587.871	-3.31649	7.53e-88
21409689	80.6885	202.623	-1.33074	1.49e-08		21399595	3.91353	86.2771	-4.45776	2.76559e-17		21390154	16.1205	160.506	-3.31565	1.47e-28
novel.765	12.1126	30.2101	-1.32669	0.0396206		21388383	1.64261	35.9099	-4.45448	9.42015e-08		21387697	0.965028	9.60699	-3.31157	0.0171067
21395595	119.615	299.143	-1.32563	1.25e-08		21394113	0.347072	7.71866	-4.45399	0.00852393		21405418	0.969677	9.60967	-3.30954	0.016849
21389473	143.511	360.473	-1.3255	5.31e-12		21390637	0.347072	7.71699	-4.45374	0.00791946		21405804	0.965028	9.58321	-3.30839	0.0135721
21383832	105.859	263.321	-1.31896	7.56e-10		21385844	53.3717	1164.23	-4.45315	1.27987e-161		21403893	4.83444	47.9253	-3.308	2.09e-08
21401854	11.1551	27.8981	-1.31829	0.0463182		21412291	1.70444	35.5274	-4.42713	3.34106e-07		21397501	208.852	2067.85	-3.3074	1e-157
21394093	77.3674	192.005	-1.31424	3.91e-08		112093566	2.39859	49.678	-4.42304	1.36906e-09		21391019	26.4208	260.415	-3.30039	5.6e-44
21407652	174.02	431.943	-1.31352	9.38e-15		21407162	0.961922	20.9141	-4.4197	0.000320866		21388132	0.970415	9.51812	-3.29772	0.0177985
21394045	268.714	667.13	-1.31228	7.02e-21		21402967	15.7638	334.988	-4.41242	3.4381e-51		21388870	13.8583	136.188	-3.29663	2.06e-23
21396565	244.232	605.042	-1.30813	1.29e-15		112091452	2.39859	48.7166	-4.3947	1.72793e-09		112095114	7.74051	75.6917	-3.28982	2.14e-13
21402237	1567.23	3855.39	-1.29915	1.25e-43		21408494	3.31614	68.8818	-4.39086	3.09312e-13		21406967	17.7581	173.452	-3.2892	1.93e-25
21390497	15.8591	39.1019	-1.29789	0.0177786		21387720	0.316156	7.37098	-4.38793	0.0101816		21402356	1.29413	12.5953	-3.28641	0.00525172
21393765	22.3767	54.7642	-1.2976	0.00295657		21399751	3.9265	82.1337	-4.38632	6.80477e-16		21391480	1.29181	12.5748	-3.28537	0.00508228
21410332	244.482	599.803	-1.2955	4.94e-19		21408744	9.81674	205.07	-4.38412	2.14318e-38		21389746	23.8431	232.402	-3.28439	5.15e-37
21402289	53.4958	130.545	-1.2933	2.41e-05		21389526	49.5849	1022.06	-4.36834	2.39497e-150		21395825	1.60328	15.6751	-3.28436	0.00224137
21387041	952.115	2327.98	-1.29081	8.52e-26		21406241	0	3.69209	-4.35183	0.0436645		21401788	20.6189	200.198	-3.27891	7.68e-31
112094718	36.2047	88.0802	-1.289	0.00039887		112091561	0	3.68837	-4.35062	0.0412626		21405367	35.7722	346.664	-3.27617	3.92e-53
21397190	25.2012	61.459	-1.28693	0.001296		21392798	0	3.68633	-4.34994	0.0422199		21404490	4.51537	43.5625	-3.2708	8.92e-08
21390860	48.0862	117.599	-1.28348	0.000683886		21391753	4.53238	93.1919	-4.3496	2.02397e-17		21386093	21.2691	205.313	-3.27048	2.74e-26
21398174	568.726	1384.42	-1.28295	1.73e-31		112093578	0	3.68261	-4.34872	0.0438967		21384805	24.8435	239.015	-3.26671	6.13e-41
21384877	237.865	578.996	-1.28222	5.7e-18		112093902	0	3.68261	-4.34872	0.0438967		21397863	3.86096	37.1206	-3.26336	3.1e-07
21391973	207.608	503.204	-1.27873	3.57e-17		112090451	0	3.68056	-4.34804	0.0439435		21407957	45.7411	438.437	-3.25988	3.4e-56
21388892	27.4728	66.7535	-1.27866	0.000683186		112094801	0.641282	13.0794	-4.32588	0.00182734		21388114	51.6729	494.39	-3.25829	7.84e-06
21395054	61.6482	149.744	-1.27762	4.6e-07		novel.1101	0.347072	7.06365	-4.32546	0.0119656		21391337	1.28727	12.2881	-3.25258	0.00446059
21400019	759.403	1839.6	-1.27747	1.27e-27		21406989	0.347072	7.04879	-4.32297	0.0179973		21397199	8.36482	79.3823	-3.24449	1.76e-13
21403675	17.785	43.0008	-1.27698	0.0113384		21384737	0.347072	7.04841	-4.32291	0.012557		21387773	174.777	1652.91	-3.24154	3.43e-177
21405963	38.5309	93.2923	-1.27687	3.78e-05		21395092	0.347072	7.04841	-4.32291	0.012557		21407162	2.25377	21.243	-3.23429	0.000635786
21406662	130.562	315.662	-1.27422	1.48e-08		21388021	0.948467	19.4922	-4.32103	0.000150187		112090313	36.109	336.669	-3.22108	4.19e-48
21407712	218.327	526.653	-1.27136	2.19e-15		21397224	0.347072	7.01269	-4.31669	0.0170232		112094803	4.84204	45.07	-3.21913	3.11e-08
21396257	306.884	739.702	-1.2713	3.05e-19		21404718	0.979383	19.4634	-4.30961	0.000138521		21398387	205.88	1909.43	-3.21291	4.18e-121
21391363	37.3892	90.0409	-1.26724	0.000100939		21394014	1.67353	32.2438	-4.29313	6.19466e-07		novel.439	1.28959	11.9179	-3.2083	0.0082046
21394133	76.3776	183.067	-1.26666	9.6e-06		21405671	24.9896	484.732	-4.29288	2.9003e-60		21406168	15.1402	139.936	-3.20714	6.07e-23
21385900	30.6436	73.6035	-1.26413	0.00038428		21403423	4.48401	89.2476	-4.29008	2.84307e-17		21401965	6.43856	59.2786	-3.20134	6.83e-11
21385677	698.267	1674.75	-1.26315	4.2e-21		21397345	25.4105	487.554	-4.26986	3.5058e-74		21385458	3.55573	32.3799	-3.18925	3.83e-06
novel.448	18.3531	44.0771	-1.26301	0.0111475		21394799	0.952952	18.7814	-4.26638	0.000181657		21393155	29.3628	266.935	-3.18475	7.36e-39
21389920	56.9733	136.968	-1.26109	1.25e-05		21403098	2.71474	50.7716	-4.26372	1.02481e-09		21390163	1.61331	14.6505	-3.18369	0.00178567
21407766	48.2707	115.692	-1.26036	6.56e-05		112092380	10.2665	195.456	-4.25827	0.0001548		21410210	3.85937	34.769	-3.16902	2.08e-06
21399168	3085.99	7373.55	-1.25688	2.91e-26		112092348	0.316156	6.72713	-4.25505	0.0154772		21410928	33.1942	298.619	-3.16888	1.32e-40
21392253	15.3049	36.2545	-1.25544	0.0325917		21409742	0.347072	6.68807	-4.24807	0.0178723		21391076	1750.29	15716.6	-3.16658	1.05e-281
21399785	517.009	1231.74	-1.25239	2.27e-32		21403105	21.9299	416.686	-4.24761	2.35837e-61		21392892	764.936	6863.3	-3.16546	3.06e-24
21394344	300.429	715.009	-1.25172	4.01e-18		21391289	2.5427	49.3946	-4.24644	7.13186e-10		21409219	20.2715	181.62	-3.16317	0.000223089
21402444	65.7038	156.011	-1.24992	1.64e-06		novel.877	14.6757	273.855	-4.24082	8.47575e-44		21401803	9.65589	86.4423	-3.16104	5.1e-14
21394926	13.2895	31.3949	-1.24129	0.0309571		112093684	18.4172	346.221	-4.23726	9.52522e-56		21401328	126.056	1124.59	-3.15709	1.42e-146
21412234	4399.43	10387.5	-1.23962	1.76e-45		21410438	1.59423	30.6095	-4.23246	1.28158e-06		21396769	2.25156	20.1132	-3.15679	0.000290703
21407076	81.3829	190.577	-1.23241	5.41e-06		21407147	1.99417	37.0105	-4.22965	3.60711e-07		21404267	38.32	341.467	-3.15467	7.84e-40
21386244	16.247	38.2581	-1.23209	0.0169		21403058	5.73715	105.094	-4.22635	8.85763e-18		21408104	2.2561	20.0805	-3.15392	0.000250114
21403957	519.328	1218.15	-1.2299	9.72e-23		21385781	779.381	14498.7	-4.21757	2.31624e-32		21406765	53.7658	475.579	-3.14457	1.7e-16
21384909	943.383	2208.39	-1.22789	1.6e-11		21387901	8.19159	152.229	-4.2166	3.35396e-28		21401623	20.9901	184.511	-3.13708	9.98e-27
21395493	28.5369	66.7764	-1.2252	0.00103712		21395517	6.18845	114.317	-4.20188	2.50948e-21		21393678	1.29266	11.2433	-3.12294	0.00860445
21391758	227.518	529.766	-1.22164	2.76e-13		21406783	1.99417	36.2321	-4.20098	5.98844e-08		21392993	3.8786	33.6608	-3.1202	5.73e-06
21388204	976.675	2276.73	-1.22052	7.39e-35		21385508	1.01478	18.0812	-4.19127	0.000366371		21407788	10.6241	92.3988	-3.11911	8.22e-15
21408484	18.2977	42.6982	-1.22045	0.0148752		21394392	0.694144	12.0665	-4.18605	0.00304254		21406178	1.61553	13.9767	-3.1149	0.0032225
21390401	67.6879	157.726	-1.22016	2.28e-06		21400484	5.02106	89.6211	-4.18141	2.93311e-16		21396400	225.572	1945.94	-3.10855	1.58e-140
21406456	22.7813	53.0787	-1.22004	0.00519673		21401893	72.0922	1301.74	-4.17992	1.76066e-90		21398557	11.2816	97.0403	-3.10461	2.92e-16
21387135	65.4002	152.284	-1.2171	1.51e-06		21392417	0.347072	6.3815	-4.17933	0.0187858		21392751	40.6417	348.598	-3.1005	3.14e-47
21407412	19.8931	46.405	-1.21647	0.0129744		21390334	0.632311	11.7769	-4.17899	0.00360233		21402370	14.5064	123.895	-3.09451	2.52e-19
21389500	72.8144	169.16	-1.21587	1.31e-06		21385680	0.347072	6.37164	-4.17751	0.0178771		novel.920	5.15509	44.0391	-3.09359	4.05e-08
21404769	24.072	55.969	-1.21558	0.00633081		21400479	7.25759	129.277	-4.1606	0.0182915		21406728	176.245	1498.9	-3.088	1.83e-93
21396285	117.764	273.129	-1.21547	6.38e-07		21401422	2.69728	46.9908	-4.1541	5.04433e-09		112091846	36.0974	306.947	-3.08778	1.15e-47
21399598	21.0051	48.5699	-1.21506	0.0166499		21399410	10.3473	184.276	-4.14117	7.21489e-33		21390737	0.965028	8.19285	-3.08324	0.0364193
21388660	85.1305	197.237	-1.21251	6.13e-07		21397608	10.3872	182.79	-4.12808	1.6448e-31		21386349	0.965028	8.19257	-3.08315	0.0342679
21388050	2509.31	5808.34	-1.21123	6.32e-28		21389766	1.26911	22.5339	-4.11548	5.63585e-05		21394014	3.86096	32.7441	-3.08203	3.26e-06
21394477	960.759	2217.69	-1.20729	7.03e-38		21385981	7.80463	135.927	-4.11483	3.62879e-26		21399563	57.33	485.245	-3.08061	1.85e-55
21395520	35.9365	82.5919	-1.20363	0.000517602		21393154	86.5979	1491.24	-4.10765	3.04254e-191		21393429	1.61711	13.6214	-3.07734	0.00554755
21389727	406.791	934.457	-1.20164	1.32e-14		21394230	5.00312	84.8525	-4.10444	5.26478e-16		21406738	2.5814	21.7613	-3.07696	0.000156684
21401549	97.1676	223.844	-1.20126	5.36e-09		112093672	20.3446	346.967	-4.09379	2.84632e-41		21412156	179.698	1513.46	-3.07407	4.8e-20
21409436	307.262	707.466	-1.20105	9.99e-16		21384441	3.87813	66.7406	-4.09128	1.17622e-12		21411601	16.4429	138.231	-3.07201	1.48e-15
21397095	243.859	557.392	-1.19347	3.93e-18		21395590	4.31346	72.4658	-4.08548	1.69168e-14		21400520	10.9601	92.0242	-3.06956	1.51e-14
21405297	183.151	418.652	-1.19293	6.26e-14		21397065	0.948467	16.5025	-4.08533	0.00145907		21405360	5.1666	43.296	-3.06833	3.85e-08
21402035	18.9558	43.422	-1.1927	0.0163175		112092779	2.37664	39.2591	-4.08363	1.80325e-07		21409921	5.79249	48.2818	-3.05814	1.83e-07
21388862	465.329	1062.31	-1.19023	1.69e-23		21397437	34.2813	580.848	-4.0798	8.66916e-93		21391237	41.9225	348.93	-3.05742	8e-38
21409922	314.758	716.572	-1.18852	1.34e-09		21395528	10.3249	175.621	-4.0749	4.47811e-25		21401097	13.8374	115.141	-3.05523	4.12e-17
21400366	33.2907	75.8364	-1.18652	0.000576505		21403754	28.1093	472.91	-4.07092	1.16378e-63		21398946	4.52087	37.4617	-3.05223	2.91e-06
21396515	1239.88	2820	-1.18623	6.55e-15		21409603	14.0688	234.759	-4.06003	1.91745e-35		21390912	3.87015	32.1015	-3.05188	3.52e-06
21395160	793.821	1804.87	-1.18612	8.01e-18		21394236	1.01478	16.4917	-4.05814	0.000467594		21409560	3.87775	32.0281	-3.04812	8.98e-06
21391756	56.0351	128.008	-1.18593	0.000203769		21398197	0.632311	10.715	-4.0446	0.00584308		21391595	1.92858	15.9686	-3.04764	0.00219261
21384567	38.2966	87.1529	-1.18452	0.00203002		21391996	1.99865	32.2788	-4.03203	7.25698e-07		21384853	1.60866	13.2732	-3.04296	0.00394307
21390944	29.5476	66.7415	-1.18004	0.00534609		21390711	2.57362	42.5944	-4.03032	2.55625e-08		21406757	2.25304	18.4397	-3.03067	0.000571376
21407284	16.8366	38.2695	-1.1786	0.0326862		novel.50	0.347072	5.71216	-4.01936	0.0286813		21405882	21.2832	173.807	-3.02987	3.99e-29
21386701	91.7917	207.65	-1.17717	7.95e-08		21409922	45.7591	742.364	-4.01853	2.29535e-86		21385508	2.25462	18.3553	-3.02499	0.000962476
21402739	905.952	2044.94	-1.17556	6.44e-15		21394947	40.9669	663.277	-4.01808	1.82853e-104		21387417	54.1431	439.374	-3.02006	2.04e-58
21402116	57.7936	130.56	-1.17509	1.42e-05		21401809	12.0388	194.948	-4.01089	4.79727e-34		21401361	0.96429	7.82893	-3.01872	0.0335518
21400990	1544.44	3477.65	-1.17157	9.28e-30		21391432	3.7031	58.4391	-4.00988	2.53362e-11		21400633	1.93397	15.6531	-3.01693	0.0031579
21385126	272.449	612.196	-1.16965	1.7e-15		21411974	3.00447	47.7286	-4.00966	5.1754e-09		21395829	118.282	957.001	-3.0159	1.48e-104
21399060	87.3613	196.484	-1.16848	8.96e-08		112092913	1.6471	26.1959	-3.99823	4.55622e-06		112092254	81.4778	658.313	-3.01362	2.75e-60
21399747	401.107	900.016	-1.16678	4.54e-10		21410164	1.0103	15.7939	-3.9978	0.000571743		21391842	487.246	3929.04	-3.01144	5.65e-228
21384688	20.5817	46.2802	-1.16468	0.0174202		21395825	0.948467	15.4373	-3.98724	0.00104602		21388243	19.0112	153.206	-3.01027	5.56e-23
21397321	18.8214	42.034	-1.16276	0.0207743		21387306	11.3137	178.553	-3.96857	1.19916e-26		21409056	4.17781	33.7227	-3.01019	7.8e-06
21403310	129.441	288.591	-1.15956	7.69e-10		21390862	2.36767	36.1791	-3.96776	4.36133e-07		21405189	30.6118	246.019	-3.00615	7.18e-36
21388079	31.6909	71.2325	-1.15919	0.0312602		21402017	8.13125	123.474	-3.95571	3.19394e-18		21408743	2.25684	18.0369	-2.99894	0.000896899
21406883	66.2115	147.684	-1.15869	3.22e-05		21403524	0.948467	15.0991	-3.95519	0.00112267		112092502	20.9727	167.322	-2.99673	8.54e-27
21383930	35.7016	79.7056	-1.15808	0.00053453		21387972	0.641282	10.0308	-3.94579	0.00986236		21397396	8.07025	64.2677	-2.99501	2.84e-10
21393653	146.969	327.796	-1.15688	1.77e-10		21409120	4.66053	70.8674	-3.94446	7.63887e-14		21409120	9.03147	71.9699	-2.99452	1.39e-12
21402630	383.397	851.828	-1.15276	1.39e-16		21411405	0.983868	15.09	-3.94119	0.000641658		21404558	4.83211	38.5143	-2.99383	2.84e-07
21397590	23.2724	51.8768	-1.15155	0.0125223		21389124	3.90456	60.0734	-3.93661	1.91849e-12		21408956	41.9413	331.804	-2.9843	4.58e-50
21394809	99.4821	220.752	-1.14907	2.41e-07		21388382	0.347072	5.36782	-3.93004	0.0449864		21401809	25.1319	197.965	-2.97713	1.65e-29
21392007	103.275	228.061	-1.14679	1.33e-05		112090754	0.347072	5.36487	-3.92938	0.043732		21401804	7.09813	55.8286	-2.9764	3.2e-09
21400494	42.0932	93.2728	-1.14655	0.000471467		21392486	0.347072	5.35835	-3.92798	0.0349721		21410659	5.48504	43.0213	-2.97163	1.28e-07
112093342	79.8925	176.833	-1.14573	2.79e-07		21387599	26.1575	395.344	-3.92793	1.89243e-56		21391068	94.4122	734.533	-2.95941	9.41e-84
21389050	870.113	1920.28	-1.14264	2.09e-31		21403022	6.30763	94.9384	-3.92701	3.16509e-18		21409218	82.8643	643.454	-2.95703	3.48e-81
21387631	481.55	1062.43	-1.14264	1.4e-20		21402558	37.942	578.823	-3.92356	1.26937e-68		21389081	2.89202	22.4966	-2.95657	0.000300642
21390370	21.2308	46.9405	-1.13975	0.0191811		21405658	2.66188	39.7604	-3.91629	2.08762e-07		21383885	3.22504	25.0421	-2.95608	0.00119161
112092644	18.9433	41.8355	-1.13913	0.0193889		21395232	59.2231	888.536	-3.91462	9.65317e-91		21394260	1.93618	14.9921	-2.95376	0.00312481
21396183	49.6983	109.892	-1.13867	0.000501727		21399108	69.6607	1047.77	-3.90993	5.68628e-111		21400553	13.8627	107.406	-2.95357	4.61e-18
112090832	24.2777	53.4082	-1.13265	0.0101019		21385587	14.0419	211.279	-3.90909	8.42017e-31		21392877	17.0791	131.695	-2.94627	2.98e-17
21395435	56.7114	124.381	-1.13192	3.14e-05		21409790	0.641282	9.7564	-3.9038	0.00919628		112092207	2.26075	17.3803	-2.9442	0.000912708
21390751	304.71	666.346	-1.13087	3.73e-13		112090528	15.3903	229.946	-3.90158	9.55464e-35		21399774	898.484	6905	-2.94204	3.99e-270
21399273	31.6297	68.9481	-1.13037	0.0424231		novel.390	0.641282	9.72758	-3.90011	0.00883468		21398911	171.244	1314.82	-2.94084	2.28e-121
21398388	17.3479	37.9961	-1.12999	0.0370188		novel.953	5.46787	82.2369	-3.89152	6.80477e-16		21406087	1.29192	9.88591	-2.93732	0.0219264
21399994	1373.81	3000.73	-1.12694	0.0111312		21390580	10.8769	160.286	-3.89052	1.09207e-05		21399596	10.9728	83.7915	-2.93377	4.53e-12
21404655	17.0964	37.2448	-1.12616	0.0284291		21402363	0.961922	14.4577	-3.88693	0.0015144		21393674	424.887	3243.81	-2.93247	3.31e-206
21404101	376.025	819.881	-1.12573	2.25e-15		21386934	8.21802	121.207	-3.88685	3.43717e-23		21399986	34.2047	260.823	-2.93163	1.01e-33
21407000	62.0466	135.067	-1.12312	1.97e-05		21411531	17.6932	256.167	-3.87304	6.84039e-36		21408228	11.6184	88.546	-2.93103	1.5e-13
21406130	1840.7	4007.92	-1.12281	3.71e-32		112091451	5.52074	81.2171	-3.87006	6.09878e-16		21394392	1.61257	12.2536	-2.92639	0.0084069
112095398	36.0071	78.5871	-1.1214	0.00490946		21387514	1.38829	19.4734	-3.86696	0.00046513		112090590	381.588	2882.73	-2.91713	2.42e-158
21391541	26.658	58.1031	-1.11992	0.0198695		21404346	11.2529	163.072	-3.86596	4.64731e-21		21405693	17.7084	133.79	-2.91658	7.4e-19
21390320	246.786	537.348	-1.11968	1.2e-09		21401360	0.636796	9.4474	-3.8596	0.0109967		21394408	281.553	2123.65	-2.91499	5.77e-28
21398428	57.5587	125.014	-1.1163	4.5e-05		21406253	49.4762	718.708	-3.85589	8.62713e-87		21412388	4.51072	34.0001	-2.91413	4.33e-06
21397968	289.275	627.896	-1.11581	1.78e-13		112091807	3.03987	43.0159	-3.85537	1.39156e-08		21394974	5.80644	43.6324	-2.91009	6.67e-08
21402665	1278.87	2769.76	-1.11565	4.97e-15		21404536	3.29868	47.3794	-3.85227	7.34293e-10		21403694	23.5133	175.63	-2.90048	9.48e-23
21387835	52.2279	112.68	-1.11382	0.000379581		21397335	0.961922	14.0533	-3.84772	0.00223736		21404944	40.9263	304.741	-2.896	4.92e-45
21410032	608.314	1315.62	-1.11355	5.32e-25		novel.441	6.92696	99.2033	-3.84726	1.88194e-17		21401360	1.28727	9.59777	-2.89518	0.0234763
21400891	39.8603	86.4348	-1.11286	0.000871841		21395573	3.32511	47.2812	-3.84678	1.25888e-09		21390238	5.15044	38.3094	-2.89286	6.74e-06
21388529	188.075	406.695	-1.11228	1.7e-10		21410827	16.5837	239.448	-3.84652	8.82137e-29		21387317	2.57063	19.093	-2.88976	0.000931821
21384921	30.7178	66.0698	-1.10639	0.00651178		21409147	0.316156	5.02053	-3.83413	0.0491298		21397050	0.96809	7.15664	-2.8869	0.0467466
21404037	96.8017	208.491	-1.10441	3.72e-07		112095127	1.95877	27.8601	-3.82719	4.46399e-06		21396966	4.52075	33.3706	-2.88545	1.23e-05
21407002	108.121	231.585	-1.10216	6.73e-06		21405234	14.6034	208.443	-3.82612	6.66841e-37		21388051	8.38404	61.927	-2.88542	2.85e-10
21409515	74.4103	160.191	-1.10208	0.000178788		112092444	0.694144	9.42564	-3.82277	0.0134904		21394334	11.626	85.6365	-2.88197	8.84e-13
21395237	1805.63	3870.17	-1.10022	4.25e-28		21398428	9.1266	129.53	-3.82251	9.47e-24		112093382	19.0318	139.718	-2.87651	1.19e-22
21387892	22.8928	49.0219	-1.09986	0.0303487		21385997	9.40335	133.822	-3.82108	1.67884e-22		21385928	5.81098	42.6252	-2.87584	3.44e-07
21408980	104.158	223.349	-1.09761	9.04e-07		21406178	0.957437	13.762	-3.81703	0.00136206		21390749	28.3808	206.696	-2.86457	1.18e-27
21395143	276.333	591.656	-1.09735	5.26e-12		21398458	1.67353	23.2069	-3.81652	4.07458e-05		21401736	1.93238	13.9984	-2.85531	0.0046892
21399600	77.4088	165.798	-1.09556	4.97e-06		21393482	1.93682	27.5124	-3.81288	3.47863e-06		21403754	66.3932	480.271	-2.85467	3.29e-08
21392030	195.594	416.62	-1.0936	7.26e-08		21407785	20.4423	285.507	-3.81068	1.22693e-46		21395792	3.87247	27.9891	-2.85391	2.25e-05
21386457	29.0793	61.9626	-1.09357	0.00986692		21406662	23.1935	327.161	-3.80502	7.32009e-41		21406136	91.5119	660.66	-2.85152	5.54e-68
21385893	23.1083	49.5613	-1.09285	0.0245656		21407210	18.7773	260.182	-3.79836	3.35769e-41		21391108	242.45	1734.11	-2.83835	4.11e-154
21389652	34.7103	73.8243	-1.09188	0.0314185		21389547	1.73536	23.2131	-3.7977	0.000119247		21392458	2.57454	18.3859	-2.83484	0.00121864
21396708	37.4724	79.7555	-1.08991	0.00478717		21390290	0.641282	9.05696	-3.79764	0.0131646		novel.852	2.24997	16.017	-2.82887	0.00233122
21388677	22.6379	47.9497	-1.08671	0.0251942		21409618	8.58255	118.611	-3.79683	8.94003e-21		21396343	67.3849	475.852	-2.81997	2.85e-67
21405944	55.7375	117.834	-1.08466	0.000889029		21396136	16.8923	236.043	-3.79682	9.84852e-39		21395316	3.86402	27.3049	-2.81939	3.92e-05
21397545	488.371	1034.3	-1.08348	4.22e-17		21404617	1.65158	22.7886	-3.7963	3.7233e-05		21401624	14.834	104.445	-2.81552	2.52e-16
21403183	19.0084	40.1414	-1.07722	0.0321838		21406929	1.01478	13.7545	-3.79582	0.00166119		21405572	1.93544	13.5884	-2.81301	0.00556862
21385245	205.926	433.993	-1.07705	2.85e-09		21398696	13.7213	189.357	-3.78437	1.8087e-27		21409046	282.746	1980.59	-2.80833	9.16e-156
112093992	51.1174	107.489	-1.07646	0.000359907		112093382	9.97431	137.581	-3.7693	5.68249e-22		21401893	189.334	1322	-2.80373	1.82e-12
112094672	89.3704	188.117	-1.07502	1.25e-06		21405189	18.0004	242.251	-3.76515	7.28551e-31		21390877	7.08684	49.3933	-2.80045	3.3e-08
112093384	27.0979	57.1826	-1.07447	0.0204396		21406974	8.08538	110.749	-3.76347	1.3626e-19		21399839	21.2718	148.073	-2.79868	9.93e-23
21393995	63.5839	133.467	-1.07443	9.4e-05		21388776	29.0688	392.17	-3.76227	1.28107e-58		21411792	1.61479	11.2174	-2.79859	0.012888
21385321	43.0895	90.3149	-1.07334	0.00322091		21392892	501.088	6758.54	-3.75334	6.39029e-124		112091301	15.1346	105.27	-2.79724	7.64e-15
21392231	33.9933	71.2777	-1.0725	0.00558564		21393962	16.3947	220.093	-3.75147	0.000834605		21408955	5.79651	40.2195	-2.79355	6.93e-07
21403781	116.584	245.792	-1.07166	6.84e-06		21396314	4.39275	57.8875	-3.74864	1.89133e-09		21387073	65.1876	450.459	-2.78929	9.93e-55
21402368	58.9755	123.751	-1.07006	0.00014393		21387057	1.27808	17.4626	-3.74669	0.000513989		21389744	84.1234	581.05	-2.78796	9.41e-67
21409507	970.248	2035.59	-1.06957	3.82e-21		21404504	3.32062	44.0893	-3.74467	2.29395e-08		21390990	96.7375	666.685	-2.785	7.84e-68
21406614	408.474	856.979	-1.06904	1.57e-20		21391248	12.7564	168.086	-3.74134	3.55956e-23		21395745	171.811	1180.71	-2.78072	2.83e-83
21400693	168.591	353.775	-1.06894	3.74e-10		21387906	9.49209	126.535	-3.73634	7.45689e-21		21394710	3.86487	26.574	-2.78068	7.04e-05
21396742	23.4187	48.916	-1.06848	0.0260208		21409921	3.5884	47.5469	-3.72482	5.98047e-09		112091014	11.9274	81.8376	-2.77818	2.39e-13
112090580	78.6185	164.556	-1.06785	7.53e-05		novel.584	13.8604	184.21	-3.71891	5.89805e-25		21398684	435.64	2986	-2.7768	1.19e-114
21408698	39.7605	83.3506	-1.06683	0.00269524		21397955	112.32	1464.33	-3.70348	4.66492e-23		21392290	14.4787	98.9942	-2.77229	9.4e-12
21399902	1823.06	3810.23	-1.06399	2.92e-22		21402630	67.9233	882.409	-3.69422	1.07922e-91		21388070	10.6556	72.6324	-2.77012	4.96e-11
21394679	20.1647	42.0781	-1.06342	0.04786		21393668	39.9127	515.127	-3.6931	9.37464e-09		21386162	2.2561	15.3929	-2.76904	0.00383265
21390088	108.297	225.739	-1.06147	4.82e-06		112095043	0.641282	8.40696	-3.69001	0.0184006		21394057	19.6524	133.616	-2.76465	2.77e-19
21409251	3103.74	6475.86	-1.06136	1.94e-16		21389918	8.66531	113.206	-3.68845	2.86353e-18		21403524	2.25842	15.332	-2.76386	0.00270711
21391296	94.2414	196.006	-1.05802	1.37e-06		21393972	1.30002	16.779	-3.68222	0.000412296		21400944	10.9493	74.3659	-2.76259	4.61e-11
21399651	24234.2	50289	-1.05316	5.24e-28		21394526	181.222	2324.84	-3.68039	3.6128e-106		21408861	15.4822	104.998	-2.76196	2.17e-16
21396538	1193.45	2474.86	-1.05293	1.43e-14		112092796	3.00895	37.9928	-3.67926	1.89883e-07		21400995	23.1872	157.176	-2.75993	3.92e-22
21387555	53.6036	111.456	-1.05131	0.000427825		21396919	36.3413	464.282	-3.67542	5.56247e-68		21395231	1438.51	9743.58	-2.7599	5.17e-142
21405693	61.5555	127.123	-1.04869	0.000413801		21406366	14.4588	184.252	-3.67505	5.65184e-27		21405291	14.4964	98.1824	-2.75894	2.02e-15
21409601	107.983	223.495	-1.04535	0.000150389		21391255	0.961922	12.4482	-3.67341	0.00696493		21392274	3.88007	26.1626	-2.75627	0.000330339
21384790	80.7821	166.402	-1.04352	6.42e-06		21384255	0.663227	8.37776	-3.67329	0.0156676		21392505	25.8035	174.176	-2.75521	5.29e-25
21398361	22.1481	45.6097	-1.04327	0.0272263		112095114	5.84138	74.5328	-3.66408	1.57141e-14		novel.703	2.57221	17.3215	-2.75007	0.00318486
21396149	719.852	1480.36	-1.04069	1.49e-17		21400101	4.64708	57.7078	-3.64802	2.4274e-10		21410093	39.6694	266.055	-2.74567	2.94e-35
21408475	50.3561	103.086	-1.03903	0.00244843		21394057	10.6874	131.56	-3.63997	2.19093e-20		21389866	3.86941	25.8982	-2.7428	8.08e-05
21400315	275.357	564.133	-1.03624	4.85e-11		21391129	14.6488	180.643	-3.63887	8.23637e-26		112093164	80.9167	540.893	-2.74048	3.27e-62
21409618	56.0659	114.454	-1.03397	0.00102145		21404690	1.65607	20.4538	-3.63875	0.000128327		21407847	5.15594	34.4449	-2.73931	3.96e-06
21395210	330.768	676.593	-1.03352	8.62e-16		21384020	8.81092	109.962	-3.63854	3.66241e-19		21399931	6.78541	45.194	-2.73774	5.46e-06
112092488	37.6303	76.9286	-1.03343	0.00739708		novel.1026	1.59423	20.1159	-3.62972	0.000130135		21389827	60.5523	403.663	-2.73634	7.23e-38
21405464	57.8526	117.901	-1.03162	0.00444047		novel.879	5.74462	72.1574	-3.62903	1.70074e-10		21387599	60.339	401.514	-2.73466	3.8e-48
21398198	59.5962	121.727	-1.03087	0.000141627		21401418	2.08243	24.8213	-3.62881	0.000110223		21406887	4.51072	29.958	-2.73124	2.12e-05
21406339	98.3714	201.456	-1.03059	7.34e-05		21394800	3.97536	48.2789	-3.61437	3.15598e-09		21385272	18.6895	123.982	-2.72951	5.12e-18
21389629	148.838	304.053	-1.02996	5.26e-09		21395283	189.365	2316.15	-3.61355	2.81975e-20		21385003	27.7175	183.842	-2.7291	4.98e-25
21390910	2075.66	4231.25	-1.02801	1.08e-12		21390737	0.667713	8.06375	-3.61324	0.0264024		112093729	3.55108	23.5162	-2.72848	0.000171366
21407505	34.8939	71.006	-1.02748	0.00450333		21398114	15.6975	191.875	-3.61071	1.8807e-27		21399795	53.7766	355.553	-2.72438	1.26e-31
21402824	28.2888	57.5921	-1.02677	0.0173207		21385970	6.50909	79.8296	-3.61063	2.95199e-14		21407679	45.7957	302.432	-2.72344	4.42e-41
21403325	231.517	471.34	-1.02624	5.92e-12		21388755	1.94579	23.8923	-3.60787	5.21711e-05		21410662	53.8447	353.93	-2.71628	9.12e-44
21385979	27.2026	55.4198	-1.02596	0.0124495		21389812	4.15888	51.4315	-3.60516	1.90126e-09		21394152	28.0502	184.166	-2.71474	1.64e-26
21395389	41.8389	85.1327	-1.02482	0.00159437		21407927	0.694144	8.07657	-3.59964	0.0217345		112092301	39.3075	257.423	-2.71074	1.52e-25
21384409	122.05	248.357	-1.02453	2.3e-07		21405565	0.694144	8.08605	-3.59849	0.0269208		21393012	5.80411	37.8857	-2.70616	1.18e-06
21394316	51.0977	104.3	-1.02414	0.00230144		21391864	231.875	2795.52	-3.5903	2.03398e-89		21395229	1996.84	13022.8	-2.70524	1.07e-199
21400474	139.613	284.382	-1.02356	1.1e-07		21405249	0.961922	11.7501	-3.58984	0.00684958		21404965	1.94083	12.6318	-2.70466	0.0100392
21389679	82.9589	168.181	-1.02084	2.97e-05		21390658	1.67801	19.7868	-3.58586	0.000145849		21409611	166.652	1086.28	-2.70432	3.72e-108
21386637	112.089	227.334	-1.02071	9.07e-07		21393894	44.4661	531.794	-3.58349	2.50685e-11		21405196	5.81943	37.8251	-2.7025	1.74e-05
21408727	496.224	1003.14	-1.01653	1.98e-16		21402746	2.29735	27.4858	-3.58312	2.3954e-05		21398757	216.085	1403.66	-2.69944	4.3e-11
21397919	273.417	552.545	-1.01644	1.1e-10		novel.1220	10.9637	129.959	-3.58065	2.36154e-20		21388315	192.998	1250.17	-2.69503	1.31e-81
21385661	445.671	900.21	-1.0159	2.52e-12		21384378	87.4516	1038.11	-3.57231	4.95057e-115		21395769	2.89752	18.7867	-2.69501	0.0018076
21385317	779.617	1574.73	-1.0149	1.33e-21		novel.31	1.01478	11.7649	-3.56912	0.0040176		21397189	37.3724	241.579	-2.69192	1.95e-31
21396100	114.375	230.389	-1.01379	6.87e-06		21411515	135.225	1596.36	-3.56247	2.04818e-09		21404690	3.21806	20.7688	-2.68881	0.000719287
21405417	31.7556	63.7681	-1.01255	0.0170675		21383736	2.056	23.4851	-3.55848	7.59288e-05		21404629	8.6823	55.9805	-2.68656	3.46e-07
21394056	318.43	641.426	-1.00895	4.08e-13		112093386	0.663227	7.70751	-3.55275	0.0221444		112091109	58.6478	377.089	-2.68448	4.58e-38
21389538	22.4522	45.08	-1.00497	0.0293999		112092595	1.93682	22.8301	-3.54404	3.18909e-05		21402068	23.8601	152.935	-2.68045	1.2e-21
21406110	23.0405	45.9753	-1.00217	0.0368673		21393108	0.979383	11.4033	-3.53874	0.0045863		novel.25	7.39746	47.3693	-2.67693	6.34e-07
112091615	66.5828	133.498	-1.00006	0.000158587		21398336	2.85886	33.9125	-3.53798	1.10561e-06		novel.925	6.13322	39.1539	-2.67564	5.67e-06
						21402423	325.647	3772.44	-3.53577	1.63427e-138		21408494	10.9462	69.9616	-2.67457	2.6e-10
						21387954	22.0361	254.715	-3.53512	1.55222e-35		21399941	219.006	1397.35	-2.67387	8.33e-97
						21411804	161.021	1859.33	-3.5318	6.03643e-102		112090552	7.43189	47.3494	-2.67341	5.57e-07
						21394000	3.54451	41.2846	-3.52668	1.91749e-07		21387286	9.36205	59.6131	-2.67199	1.92e-09
						21400604	7.48548	84.592	-3.52637	2.95178e-10		21385967	1.29339	8.20327	-2.66671	0.0421102
						21385003	15.7773	181.019	-3.52405	8.14712e-32		21388749	4.18774	26.5732	-2.66509	0.000146369
						112091971	1.96774	22.4725	-3.51558	3.67895e-05		112090737	11.273	71.5052	-2.66457	9.3e-11
						novel.1211	1.96774	22.4672	-3.51525	5.00115e-05		21410116	73.1409	463.869	-2.66437	4.15e-49
						21387717	1.96774	22.4623	-3.51503	4.15125e-05		21386440	4.19471	26.5384	-2.66263	9.78e-05
						21393817	1.65158	18.7278	-3.51284	0.000426753		21391864	449.275	2839.28	-2.65982	4e-16
						21392330	0.641282	7.41338	-3.50942	0.0349516		21394210	10.3218	65.0797	-2.65697	2.13e-10
						21386440	2.32378	26.1338	-3.50533	2.55142e-05		21410630	7.74568	48.7213	-2.65402	1.07e-07
						112090824	12.3948	140.409	-3.49882	1.19748e-20		21403268	22.9112	143.862	-2.65121	1.17e-20
						21401803	7.60365	85.126	-3.49369	3.22541e-13		21401900	457.408	2869.35	-2.64911	1.09e-22
						21397627	73.3162	823.845	-3.49039	2.19981e-06		21396743	61.3328	383.544	-2.64517	2.6e-34
						112093610	2.59108	29.2259	-3.48551	1.8218e-05		21390361	3.86328	24.1858	-2.64512	0.000202246
						21399756	30.6754	344.09	-3.48457	5.03439e-53		21393954	29.0305	181.313	-2.64323	3.34e-26
						21392274	2.34124	25.7693	-3.48173	3.46927e-05		21402819	20.2889	126.798	-2.64281	2.3e-17
						21401916	15.0437	167.987	-3.47984	5.57247e-27		21398282	20.6532	128.867	-2.64206	1.81e-16
						21404042	1.70444	18.4398	-3.47563	0.000442984		21401603	26.7743	165.579	-2.62912	4.88e-23
						21392915	21.0836	233.572	-3.47489	4.1391e-34		21408293	456.715	2824.37	-2.62841	1.08e-153
						21409916	7.60765	83.9284	-3.47359	1.05846e-14		112094761	4.1908	25.8836	-2.62683	0.000129291
						novel.653	0.694144	7.40185	-3.47239	0.0309967		21396521	1.94009	11.9417	-2.62392	0.0156418
						21387417	39.1847	432.633	-3.46934	2.10813e-56		21391175	7.42196	45.7036	-2.62292	1.34e-06
						21384898	44.6092	491.075	-3.46726	1.02066e-55		21386920	262.434	1609.47	-2.61654	1.17e-83
						21393630	1.30451	14.3976	-3.46085	0.00145887		21387906	20.9644	128.502	-2.61604	5.46e-18
						novel.381	1.94131	21.523	-3.45825	0.000102995		21387408	222.837	1365.23	-2.61498	4.16e-13
						21391835	19.6908	215.933	-3.4572	1.20203e-36		21393300	36.78	225.093	-2.61388	1.14e-29
						21391019	23.357	256.429	-3.44805	1.94174e-40		21394712	13.5206	82.7532	-2.61266	7.29e-11
						21397114	18.0168	195.538	-3.44037	1.5036e-32		21390411	54.7415	334.898	-2.6123	3.35e-31
						21406728	136.524	1476.11	-3.43754	3.53682e-81		21395308	15.7877	96.5324	-2.61145	3.3e-13
						21404602	3.0309	32.201	-3.43598	5.13718e-06		novel.1220	21.6185	131.999	-2.61059	3.46e-17
						21392515	5.20458	56.42	-3.43154	4.65153e-11		21394911	65.7685	401.452	-2.60951	1.98e-51
						21392026	16.5757	179.424	-3.42953	5.33219e-29		21387896	28.0716	171.053	-2.60795	9.88e-24
						novel.846	1.04122	10.7463	-3.42428	0.00926468		112094758	4.19545	25.5346	-2.60671	0.000141959
						21392960	14.9595	161.255	-3.42419	7.09627e-26		21384280	37.0369	225.268	-2.60418	3.29e-21
						21386920	147.819	1584.88	-3.42184	1.93538e-138		21387233	84.78	513.755	-2.5991	9.11e-54
						112094451	89.5789	952.683	-3.4158	6.4653e-72		21389392	3.54643	21.4922	-2.59904	0.000497018
						21395623	99.3517	1060.99	-3.4153	2.16823e-123		21393891	7.10965	43.0052	-2.59808	4.49e-06
						21394555	3.57943	38.2785	-3.41276	2.96059e-07		21409392	199.521	1208.16	-2.59795	3.52e-87
						21401741	7.46252	79.9097	-3.41264	4.49324e-12		21409289	2.2523	13.6321	-2.59578	0.00779256
						21404895	6.39589	66.8105	-3.40853	3.96992e-10		21389021	31.9173	191.97	-2.58829	1.39e-26
						21396620	12.0348	127.882	-3.40353	6.63264e-20		21393568	3.22577	19.3755	-2.58762	0.00192102
						21392811	2.27492	24.1754	-3.40245	5.45558e-05		21388529	71.3327	427.871	-2.58513	2.02e-38
						21406172	0.694144	7.02869	-3.39801	0.0382465		21384444	85.4236	512.222	-2.58407	3.27e-55
						21387387	7.89289	82.9129	-3.39754	1.86265e-15		21394510	255.863	1527.21	-2.57717	8.35e-95
						novel.385	1.30002	13.7525	-3.39571	0.00185613		21406395	61.5587	366.347	-2.57292	4.1e-43
						21409289	1.26462	13.4251	-3.37564	0.00483158		21390855	1.60866	9.57786	-2.57092	0.0302536
						21394869	17.8194	183.626	-3.37203	4.06902e-26		21386388	1.61564	9.54486	-2.56438	0.0359569
						21404774	8.1517	84.5015	-3.37006	3.77594e-15		112091399	2.25853	13.3276	-2.56086	0.017877
						21392759	72.0842	744.19	-3.36986	4.14706e-13		21392647	8.39249	49.4866	-2.56044	1.45e-07
						21385758	196.749	2030.66	-3.36835	6.97602e-145		21385816	12.2557	72.2536	-2.5599	3.72e-11
						21390507	0.641282	6.70817	-3.36619	0.0436978		21394778	35.1994	207.043	-2.55708	2.69e-18
						21407847	3.32511	33.9149	-3.36611	6.13639e-07		21402106	16.7495	98.4369	-2.55446	9.47e-14
						21403540	61.339	628.142	-3.36114	7.74296e-65		21407693	10.3356	60.6122	-2.5536	1.96e-08
						21399806	4.31346	43.7096	-3.35372	2.81826e-08		21388358	32.5904	191.224	-2.55329	5.09e-22
						novel.719	7.52836	76.9686	-3.35329	1.24009e-13		21410463	13.558	79.4215	-2.55124	6.68e-10
						21403108	0.663227	6.71803	-3.35316	0.0413581		21395362	9.66105	56.6165	-2.54996	3.94e-07
						21395448	1.96774	20.0711	-3.35302	0.000260237		21401568	12.8906	75.4365	-2.54826	2.85e-09
						21397260	5.43397	54.3568	-3.35289	3.42598e-08		21407462	182.746	1065.85	-2.54381	5.52e-76
						21401209	15.5155	156.343	-3.35203	9.77278e-16		112092669	21.606	125.925	-2.54351	6.21e-15
						21404096	1.33543	13.4468	-3.35111	0.00254859		21396289	21.8939	127.527	-2.54103	6.28e-16
						21391465	1.0103	10.0831	-3.34734	0.0096715		21396969	112.637	654.56	-2.53934	2.63e-52
						21410093	26.0119	261.976	-3.33696	1.4142e-37		21393154	260.652	1514.5	-2.53835	2.55e-69
						21391842	383.218	3868.74	-3.33661	1.55652e-172		21384898	86.0307	498.718	-2.53475	1.32e-46
						21385272	12.0523	122.086	-3.33581	1.74146e-20		112092476	8.06866	46.711	-2.53412	2.05e-07
						21390900	9.22832	92.7311	-3.33514	3.43086e-16		novel.441	17.3961	100.763	-2.53298	1.24e-12
						21397496	0.694144	6.73122	-3.33397	0.0434508		21411521	8.06718	46.4121	-2.52469	2.87e-07
						21399962	54.1946	545.551	-3.33241	0.0431327		21403559	2.89899	16.6715	-2.52348	0.00312154
						21412524	0.694144	6.71932	-3.33154	0.0445945		21406493	3.86255	22.1633	-2.51903	0.000729477
						21401070	0.948467	9.74116	-3.32644	0.0147094		21395456	10.0034	57.1886	-2.5163	1.81e-08
						21408625	8.12975	81.8366	-3.32498	9.58906e-15		21391776	1.61025	9.18776	-2.51194	0.0389001
						21384952	2.96058	29.5699	-3.32441	8.22791e-06		21412606	2.57137	14.6954	-2.51166	0.0109218
						21400676	2.62199	26.2301	-3.32319	5.82721e-05		21397503	59.4443	338.769	-2.51087	3.19e-05
						21395170	4.80016	48.7374	-3.32304	3.97349e-08		21392732	304.701	1735.6	-2.51002	1.42e-86
						21403550	20.208	202.364	-3.31988	4.88483e-32		21401422	8.3892	47.7163	-2.50845	1.31e-06
						21405989	3.60586	35.9164	-3.31749	1.17436e-06		21412237	10.9639	62.3076	-2.50708	3.85e-09
						21401652	1.33543	13.1161	-3.31465	0.00340136		21396873	10.6522	60.4418	-2.50479	1.83e-07
						21395351	18.6142	185.523	-3.31457	4.63835e-28		21406256	17.1023	96.8167	-2.50166	5.74e-13
						21392234	97.6813	968.235	-3.30786	6.60929e-86		novel.689	7.74568	43.6356	-2.49479	1.19e-06
						21409460	236.394	2339.11	-3.30452	5.82789e-96		21409784	44.8185	252.28	-2.49283	1.82e-29
						21409626	11.1651	110.074	-3.30447	9.1584e-20		21399395	1.93312	10.871	-2.49182	0.0262815
						21394778	20.6827	203.869	-3.3034	1.70749e-28		21405626	14.5066	81.4449	-2.48903	7.14e-11
						21398804	1.35737	13.0515	-3.29906	0.0055282		21398802	218.341	1224.06	-2.48707	1.14e-109
						21387408	136.334	1344.18	-3.29836	6.66809e-50		21393401	9.65515	54.1334	-2.48606	3.36e-07
						21396898	39.8858	391.14	-3.29768	3.60421e-09		21406219	31.6134	176.632	-2.48243	1.22e-23
						21391504	18.8685	185.732	-3.29373	5.06488e-28		21388021	3.54875	19.7992	-2.48009	0.00127049
						21389116	11.4853	112.087	-3.28887	1.24632e-16		112093231	11.616	64.7648	-2.47966	8.9e-09
						112091846	31.1701	302.26	-3.28494	2.96588e-26		21392900	10.9423	60.994	-2.47747	9.87e-08
						21401914	68.3866	667.9	-3.28283	1.79673e-47		21399165	7.73354	42.9702	-2.47348	1.61e-06
						21383742	0.663227	6.37164	-3.27755	0.0428786		21391268	2.58055	14.329	-2.47329	0.00997772
						21396370	7.10301	68.496	-3.27648	0.00789343		21405383	2.57834	14.3165	-2.4728	0.00637967
						21393300	22.8569	221.642	-3.27493	1.27465e-35		21393835	10.0048	55.4537	-2.47183	1.29e-07
						21410644	20.737	199.699	-3.27164	4.98951e-25		21396000	9.03527	50.0775	-2.47137	1.4e-07
						21394504	298.426	2878.08	-3.27141	5.68252e-79		21408922	25.4859	141.253	-2.47068	9.16e-18
						21399045	95.1814	917.653	-3.26624	2.88239e-92		21396732	244.583	1353.15	-2.46818	3.6e-60
						21403134	40.1975	387.154	-3.26603	3.88959e-58		21410164	2.89435	16.0423	-2.46806	0.00556345
						21404745	6.17948	59.6904	-3.26586	1.10748e-10		21408180	99.2939	548.163	-2.46483	3.02e-52
						21395456	5.79749	56.3155	-3.26523	1.61175e-09		21397159	3.22197	17.799	-2.46406	0.00407262
						112093278	24.9398	238.696	-3.26072	1.48912e-37		21395471	351.133	1934.85	-2.46207	8.03e-21
						21386388	0.983868	9.3972	-3.25748	0.0121994		21394707	4.52064	24.8715	-2.46125	0.000356243
						21393740	12.0607	115.639	-3.25683	7.44426e-19		21408524	1.61246	8.85652	-2.45784	0.0449244
						21405291	10.0751	96.6786	-3.25568	9.92927e-16		21405268	191.849	1046.85	-2.44787	7.14e-61
						21392335	3.35602	31.4954	-3.25404	5.60739e-06		21398452	53.7754	293.201	-2.44611	2.82e-24
						21399157	21.2701	203.931	-3.25197	3.64413e-18		21398549	15.1562	82.4306	-2.44359	1.26e-11
						21405040	32.1944	304.617	-3.24446	2.22544e-30		21408896	6.44469	34.9837	-2.44093	7.16e-05
						21393401	5.73266	53.3043	-3.24222	2.74192e-08		21397597	87.3581	472.937	-2.4364	4.35e-49
						112091461	4.47504	42.9086	-3.23984	2.18853e-07		21403423	16.7558	90.6329	-2.43499	5.34e-12
						112095208	114.605	1075.61	-3.23365	4.56876e-54		21392890	434.839	2348.07	-2.43282	7.98e-136
						21405418	1.04122	9.45893	-3.23154	0.0287795		21386904	3.54802	19.0663	-2.42659	0.00200171
						21388239	1.67801	15.5097	-3.23041	0.00205015		21394947	125.766	673.612	-2.42126	9.24e-75
						21401668	4.28703	40.0369	-3.22953	2.22207e-07		21396057	5.48567	29.361	-2.42034	0.000132323
						21402559	4.55481	42.7106	-3.22269	1.10383e-07		21391902	7.40813	39.6022	-2.41709	6.23e-06
						112091862	0.952952	9.04839	-3.2183	0.0188663		21404504	8.38489	44.7839	-2.41652	4.93e-06
						21393954	19.3088	178.54	-3.20855	4.90135e-26		21390830	12.5664	67.0882	-2.41622	1.95e-09
						21407691	300.604	2766.62	-3.20271	3.88497e-165		21395457	8.05346	42.9502	-2.41426	3.73e-06
						21406734	137.203	1259.81	-3.20031	2.27915e-114		21387770	14.8277	78.9954	-2.41354	7e-10
						21404279	31.5865	287.422	-3.19558	4.77953e-28		novel.1125	2.90977	15.4538	-2.40923	0.021217
						21409793	33.1289	300.783	-3.19319	2.00886e-21		21398183	60.8691	323.293	-2.4085	3.61e-27
						21396836	1170.59	10687.2	-3.19093	5.6442e-237		21395405	94.776	503.244	-2.40832	1.58e-52
						novel.701	3.30316	29.8755	-3.18532	1.09207e-05		21406734	241.113	1279.46	-2.40752	5.81e-94
						21390813	14.8712	135.687	-3.17884	1.70245e-19		21410685	5.15288	27.3239	-2.40521	0.000277701
						21389599	3.52657	32.2518	-3.17469	1.67636e-05		21409412	2.90903	15.4003	-2.40517	0.01172
						21392831	41.6446	378.295	-3.17425	7.4483e-37		21386746	1.61099	8.50865	-2.40086	0.0467287
						21402251	15.8032	141.814	-3.17045	5.81295e-19		21408885	12.8902	68.0668	-2.40068	5.42e-09
						21392751	38.1594	343.217	-3.16586	2.20434e-41		21400554	55.676	294.041	-2.40061	1.16e-06
						21406967	19.3009	170.809	-3.1582	1.56388e-21		21390645	5.159	27.2187	-2.40002	0.000203076
						21403223	0.983868	8.73234	-3.15135	0.0188256		21402007	1.94009	10.2204	-2.39971	0.0343234
						21388993	10.1947	90.0696	-3.14703	6.31911e-15		21403908	4.51231	23.8029	-2.3996	0.00065409
						21390320	62.769	556.797	-3.14511	5.01251e-47		21410788	50.2763	264.424	-2.39432	2.12e-30
						21412671	128.335	1129.64	-3.14038	1.51187e-79		21407785	55.1796	289.957	-2.39401	5.88e-31
						21401248	36.1279	316.24	-3.13908	4.74849e-38		21405908	349.641	1831.49	-2.38882	2.17e-81
						112092970	2.66637	23.1391	-3.13486	8.36132e-05		21390989	13.2223	69.2073	-2.38807	1.69e-09
						21393980	16.8449	147.043	-3.13338	1.70564e-21		21395517	22.2483	116.081	-2.38376	1.12e-14
						21390983	35.8282	313.314	-3.1318	1.48857e-45		novel.1136	12.5572	65.5587	-2.38277	2.16e-08
						21390877	5.60051	48.6388	-3.12429	1.8929e-08		21401520	3.86708	20.1581	-2.38087	0.00165631
						21387607	113.663	991.798	-3.12215	3.84118e-85		21396536	77.7255	404.657	-2.38039	1.99e-45
						112093017	1.04122	8.75873	-3.12059	0.0372233		21406867	114.77	597.305	-2.37979	4.37e-43
						21387839	211.468	1836.12	-3.11991	9.46842e-56		21394684	17.0989	88.8445	-2.37806	1.46e-09
						21397982	1.99865	17.1376	-3.11642	0.000845177		21404083	3.86317	20.082	-2.37726	0.00329819
						21400029	1.61618	14.1392	-3.11606	0.00287333		21409233	7.41362	38.5229	-2.37717	7e-06
						21401325	1.61169	14.1039	-3.11491	0.00350668		21401622	95.5147	493.812	-2.3707	9.85e-46
						21397468	0.948467	8.40119	-3.11455	0.0303155		novel.626	2.90279	14.9722	-2.36754	0.00875152
						21393886	7.17728	62.1602	-3.11152	3.2151e-08		21408011	95.8475	493.63	-2.36513	3.35e-43
						21397751	2.40307	20.1608	-3.10878	0.000856612		21408741	9.36121	48.2202	-2.36489	4.31e-06
						21394677	9.71203	82.5567	-3.10607	9.5305e-12		21389737	7.42576	38.1771	-2.36317	1.18e-05
						21395771	8.18262	70.1841	-3.10017	1.55931e-11		21399859	44.4896	228.538	-2.36094	7.26e-18
						21391661	1.96774	16.8665	-3.09992	0.00171228		21401822	2.26381	11.6051	-2.35992	0.0258952
						21385771	2.63096	22.4857	-3.09986	8.18062e-05		112094862	8.38467	43.0469	-2.35956	3.91e-06
						novel.7	5.77554	49.9476	-3.09596	1.69826e-07		112095242	13.2346	67.8728	-2.35924	4.38e-09
						21398110	81.0068	692.955	-3.09521	1.13103e-63		21385078	10.3039	52.9036	-2.35884	8.99e-07
						21388584	27.6775	233.302	-3.0874	9.03706e-24		21399864	4.20095	21.4771	-2.35555	0.00356155
						21408872	47.3569	400.523	-3.08292	3.05538e-37		21407006	96.9111	494.651	-2.35148	5.49e-09
						112091239	1.91039	16.4097	-3.08213	0.00741171		21391547	7.09286	36.2114	-2.35133	4.16e-05
						21400164	89.1774	752.599	-3.07794	2.58878e-73		21391567	354.059	1806.12	-2.3508	3.03e-70
						21395788	2.72371	22.4792	-3.07683	0.000633563		novel.406	5.49043	27.9822	-2.35044	0.000548998
						novel.925	4.58525	38.5637	-3.07275	7.66767e-06		21399818	1.93312	9.84816	-2.3494	0.0447358
						112090590	337.519	2838.55	-3.07142	2.04846e-128		21399138	17.0764	87.0583	-2.34897	3.89e-11
						21395111	6.89156	57.727	-3.06864	1.66965e-10		21393442	5.49486	27.9534	-2.34866	0.000531424
						21383727	1.33543	11.04	-3.06589	0.0119756		21398974	25.4313	129.315	-2.34501	1.45e-12
						21398504	6.22834	52.0149	-3.06324	2.04818e-09		21405753	65.7594	333.768	-2.34334	2.38e-38
						21395460	7.50641	62.7855	-3.06113	5.21863e-11		112094970	51.5964	260.953	-2.3384	2.62e-21
						21396754	297.393	2473.81	-3.05768	1.23155e-53		21408919	4.50079	22.7726	-2.33773	0.0043658
						21411887	55.4682	460.88	-3.05658	0.000253293		112090691	5.80411	29.3027	-2.33607	0.000100212
						112092267	24.4656	202.302	-3.05533	1.00874e-26		21408453	35.1169	177.355	-2.33564	5.57e-21
						112091580	5.90722	49.0049	-3.05437	5.38209e-07		21404151	8.38773	42.3003	-2.33452	3.56e-06
						21405427	3.90904	32.5569	-3.05323	2.68349e-06		21403273	29.3547	147.886	-2.3332	1.7e-15
						112091549	1.28256	10.7796	-3.05288	0.021337		21384129	21.5755	108.755	-2.33263	4.12e-13
						21410206	22.7701	187.18	-3.04625	1.4225e-27		21395668	6.76766	34.064	-2.33132	3.33e-05
						21399370	498.209	4105.99	-3.04375	1.40605e-67		112094915	87.9384	442.43	-2.33034	4.4e-36
						21410389	168.656	1386.99	-3.04255	1.46276e-42		112095318	5.16195	25.96	-2.33015	0.00044287
						21387034	11.6887	94.9623	-3.03814	5.15977e-13		21390109	15.1378	75.9638	-2.32651	1.32e-09
						112093906	1.30002	10.7134	-3.03652	0.0101303		21402701	375.483	1881.78	-2.32511	9.07e-91
						21406964	34.9854	285.562	-3.03574	4.25359e-39		21393677	134.062	670.627	-2.32254	3.31e-09
						21384926	397.978	3245.88	-3.02869	1.13608e-73		21386774	147.97	739.455	-2.32096	6.9e-42
						21405360	5.26193	42.6312	-3.02259	5.65097e-08		21398461	3.54189	17.6857	-2.31957	0.00514128
						21405639	6.35601	50.9379	-3.02027	1.59144e-07		21388201	9.02989	45.0245	-2.31789	1.27e-06
						21398715	3.95742	31.9186	-3.01824	7.22868e-06		21388622	153.314	761.555	-2.31207	7.63e-41
						21393561	1.36186	10.7816	-3.01758	0.0176077		21409897	86.1034	427.073	-2.31028	1.09e-45
						112092543	1.59872	13.1123	-3.01382	0.00601486		21401318	132.725	656.039	-2.30504	2.61e-40
						21409381	67.3997	542.8	-3.01239	3.98239e-51		21406514	191.581	945.856	-2.30386	1.01e-86
						21402114	72.7893	582.368	-3.00432	1.12688e-62		21396094	1.93618	9.55468	-2.30332	0.0485829
						21408940	1.27359	10.3859	-3.00295	0.0165882		21389811	11.5967	57.1984	-2.30188	9.96e-08
						21393503	31.2689	249.748	-3.0023	2.1436e-36		21395579	143.413	705.878	-2.2989	5.89e-56
						21395809	9.53598	76.1434	-3.00135	1.97035e-12		112092713	50.6434	249.128	-2.29845	1.88e-25
						21407713	13.2052	104.147	-2.99788	2.60959e-09		21398502	2.57686	12.6922	-2.29802	0.0336231
						21401788	24.7917	197.158	-2.9974	7.29227e-19		21396351	3.55034	17.3851	-2.29263	0.00461436
						21394927	10.6081	84.0512	-2.99597	4.68968e-12		21399624	26.4089	129.199	-2.28971	2.34e-13
						21390291	4.94129	39.2573	-2.99597	3.0704e-07		21388677	10.3248	50.4396	-2.28903	7.83e-07
						21410446	33.2426	262.309	-2.99022	2.95001e-27		21410408	43.5115	212.5	-2.28796	1.24e-22
						21391048	2.63096	20.8331	-2.98925	0.000213126		21397751	4.19545	20.4768	-2.28746	0.00174555
						21398802	151.9	1205.28	-2.98807	4.45529e-112		21391413	6.44077	31.4346	-2.28541	0.000143147
						21392902	1.32645	10.4237	-2.98579	0.0132513		21398458	4.84816	23.5697	-2.28259	0.00245599
						21404044	7.54732	59.2573	-2.98165	0.022671		21394801	9.03284	43.9092	-2.28205	9.52e-06
						21410719	2372.11	18719.8	-2.98034	3.15088e-184		21405007	3.22577	15.668	-2.28073	0.00661093
						21403745	18.7379	147.215	-2.97689	8.4286e-20		21393823	24.7991	120.141	-2.27596	1.72e-12
						21410332	78.8969	621.564	-2.97493	9.98751e-67		21404042	3.88007	18.7252	-2.2732	0.00625909
						21399056	321.954	2510.74	-2.96428	4.06691e-65		21395415	5.1628	24.9357	-2.27194	0.000702643
						112090790	39.8175	310.13	-2.96357	0.00408319		21405235	2.25536	10.8856	-2.27105	0.0281393
						21408797	2.0206	15.4784	-2.96155	0.00335243		21411245	7.42207	35.7776	-2.26993	3.68e-05
						21398974	16.3966	127.331	-2.95827	1.69532e-18		21393893	2.26148	10.8903	-2.26978	0.0325131
						21387956	257.67	2000.21	-2.9553	1.51166e-143		21407003	142.166	685.137	-2.2688	1.7e-52
						21390395	46.2722	357.88	-2.95283	4.8059e-42		21401273	28.664	138.19	-2.26835	3.39e-14
						21396862	188.853	1462.02	-2.95274	4.10533e-15		112092143	93.8421	451.639	-2.26712	5.84e-41
						21400951	199.737	1544.87	-2.95131	1.68159e-130		21388166	3.54791	17.077	-2.26669	0.00659077
						21410630	6.24131	47.9806	-2.94566	4.48848e-08		21388171	42.9087	206.37	-2.26656	1.64e-22
						21409382	90.2845	693.88	-2.94551	3.15686e-52		21404218	59.0054	283.725	-2.26576	1.08e-28
						21407161	60.1705	463.717	-2.94537	1.66548e-38		21407928	129.885	624.636	-2.26546	2.35e-57
						21392182	1.96325	15.1114	-2.9437	0.00199077		21387639	4.19313	20.156	-2.26473	0.00293369
						21393812	2.99998	22.8293	-2.94279	0.000505255		21404346	34.4741	165.624	-2.2634	8.89e-17
						21385394	37.549	289.011	-2.94206	2.20367e-38		21395771	14.8667	71.2715	-2.26242	3.47e-06
						21411521	6.04882	45.6988	-2.93913	3.2788e-07		21398338	24.17	116.004	-2.26222	3.24e-14
						21391819	21.0701	160.496	-2.93413	1.70891e-24		21409584	7.39049	35.4642	-2.26034	0.000391791
						21402458	126.09	956.113	-2.92579	1.53443e-77		21388683	9.02365	43.2265	-2.26013	8.31e-05
						21389927	14.9261	112.631	-2.92494	9.11592e-14		21399273	15.1493	72.5491	-2.25969	1.36e-09
						21394413	15.3051	115.705	-2.92468	0.00206837		21384836	18.0598	86.2814	-2.25628	2.33e-11
						21408157	6.64573	50.0026	-2.92457	3.91133e-08		21397489	50.5925	241.659	-2.25559	6.94e-26
						21399391	1690.25	12808.2	-2.92143	6.47395e-113		21408422	696.407	3323.77	-2.25479	1.63e-90
						21393835	7.23816	54.6085	-2.91943	4.41967e-07		21384208	8.0449	38.4028	-2.25444	0.000100091
						21398170	5.63095	42.2893	-2.91922	4.15556e-07		21411802	2.57528	12.3059	-2.25439	0.0220489
						21412376	66.935	503.498	-2.91588	5.72648e-50		21396534	20.6412	98.3558	-2.25313	9.01e-12
						21400115	38.5155	289.907	-2.91586	2.44463e-30		21391909	1066.11	5079.91	-2.25242	2.29e-122
						21388833	5.76358	42.6169	-2.91266	5.3287e-06		21397783	9.03686	43.0495	-2.25217	8.79e-06
						21403280	48.5152	362.707	-2.91016	1.16879e-28		21406106	108.378	515.469	-2.25019	2.39e-50
						novel.593	0.983868	7.38623	-2.90988	0.035438		21392759	158.96	755.787	-2.24916	3.51e-54
						21388070	9.56241	71.5208	-2.90913	1.90515e-11		21388335	18.389	87.4068	-2.24886	1.18e-10
						21394448	206.165	1550.12	-2.908	4.07768e-76		21386450	6.4486	30.6384	-2.24867	0.000182612
						21396400	255.099	1916.24	-2.90784	3.62612e-44		21400170	75.0927	356.564	-2.2471	1.06e-35
						21409902	209.489	1570.25	-2.90723	1.19245e-91		21401620	11.2992	53.5536	-2.24551	6.89e-07
						21396014	20.1067	151.683	-2.90717	3.63339e-22		112091254	15.4775	73.2797	-2.24331	1.48e-09
						novel.333	1.58078	12.0648	-2.90479	0.0181513		21401031	20.9725	99.1918	-2.24226	3.87e-12
						21410061	54.4852	408.594	-2.90394	2.31049e-51		112095209	6.13849	28.9349	-2.23865	0.000615916
						21408922	18.5793	139.077	-2.90027	4.64563e-19		21402468	9.68662	45.6709	-2.23834	3.86e-06
						21395316	3.59737	26.8825	-2.90027	4.88814e-05		21391733	3.54337	16.7048	-2.23626	0.00595171
						21395407	1.30002	9.75139	-2.90024	0.0231236		112092427	28.3125	133.425	-2.23569	1.62e-09
						112093164	71.603	532.574	-2.89693	7.9063e-56		21408270	42.5265	200.05	-2.2334	1.95e-21
						21399814	6.54449	48.6338	-2.89331	2.1992e-08		112092302	10.9445	51.494	-2.23318	6.98e-05
						21412390	8.28434	60.6858	-2.88269	1.36033e-08		21396689	89.2893	419.622	-2.23222	5.53e-34
						21409194	23.8986	175.455	-2.87613	3.00492e-22		21410061	88.3676	414.971	-2.23151	2.46e-43
						21397331	35.5644	259.702	-2.87253	6.34711e-31		21386680	2.25695	10.598	-2.23043	0.0392504
						21403404	3874.81	28369.1	-2.87194	1.64952e-92		21391048	4.50153	21.1577	-2.23033	0.00339689
						21408253	4.07211	29.1943	-2.86891	0.000202201		21411681	116.724	547.16	-2.22886	5.82e-44
						21410559	211.828	1545.85	-2.86815	1.45475e-91		21410007	19.657	92.1172	-2.22775	8.46e-11
						21390377	46.0882	335.156	-2.8664	1.00428e-39		21409405	6.76925	31.71	-2.22758	0.000178605
						21386376	3.0663	21.8443	-2.86512	0.000724986		21404141	62.2225	291.355	-2.22699	1.54e-28
						21396632	274.536	1999.69	-2.86401	7.6102e-113		21395111	12.5679	58.6268	-2.2214	7.42e-08
						21389951	18.0388	131.012	-2.8619	2.23562e-19		21402697	12.5892	58.6509	-2.22065	1.45e-06
						21390188	13.3693	97.3678	-2.86128	2.18465e-13		21388782	76.1424	354.476	-2.21913	4.32e-34
						21408293	383.099	2781.1	-2.8596	9.19923e-146		21387284	44.1885	205.607	-2.21832	5.95e-23
						21409465	7.63008	54.9753	-2.85848	6.51849e-07		21390817	50.3319	233.573	-2.21468	1.36e-22
						21407983	1.27359	9.36929	-2.85491	0.0248884		novel.1038	6.11632	28.2641	-2.20729	0.000407707
						112094225	3.65023	26.1642	-2.85405	5.73463e-05		21407479	22.8659	105.592	-2.20659	9.35e-12
						21405804	1.30002	9.43383	-2.85147	0.0202198		21399506	29.0296	133.95	-2.20641	9.32e-16
						21387284	27.9463	202.455	-2.85093	4.23071e-26		21400385	326.363	1505.29	-2.20558	9.5e-105
						21407957	60.0569	431.704	-2.85057	4.08527e-42		21385981	29.98	138.041	-2.2029	1.36e-15
						21387317	2.59556	18.7981	-2.84845	0.000990695		21395313	103.478	475.814	-2.20079	7.35e-45
						21396696	1848.79	13308.6	-2.84809	6.40895e-133		21404081	2.89361	13.3288	-2.20066	0.0216769
						21411601	19.0506	136.16	-2.84731	8.22346e-10		21397596	6.78287	31.1259	-2.19849	0.000625056
						21391268	1.95877	14.1096	-2.84605	0.00526147		21387404	4.83602	22.2037	-2.19816	0.00165737
						21402713	0.979383	7.0538	-2.84573	0.0485283		21384378	229.779	1054.29	-2.19767	4.54e-57
						21394393	7.72085	56.0753	-2.84545	1.12269e-08		21386376	4.83296	22.1859	-2.19766	0.00156923
						21386904	2.60902	18.7776	-2.84412	0.000806208		21386731	45.1891	207.147	-2.19739	4.18e-19
						21386450	4.14991	30.1702	-2.84256	0.000118698		21389959	25.1326	115.059	-2.19462	3.05e-12
						21401156	12.1844	87.0284	-2.84125	2.70856e-13		21398899	125.691	575.281	-2.19406	4.9e-44
						21395313	65.3148	468.515	-2.84099	4.5821e-44		21399449	20.2906	92.761	-2.19175	8.53e-11
						21396936	2.34124	16.453	-2.83243	0.00180128		21395590	16.1096	73.5883	-2.19115	4.8e-09
						21410235	1.32645	9.36596	-2.83194	0.0276411		21385590	46.0743	210.496	-2.19112	3.14e-19
						21410052	29.1815	207.351	-2.82982	1.54422e-22		21399066	88.0316	400.932	-2.18748	4.58e-38
						21387251	6.03136	42.3395	-2.82947	2.89038e-06		21388959	4.1963	19.0835	-2.18606	0.00529313
						21393082	81.5254	576.272	-2.82389	7.73736e-56		21409460	522.741	2375.53	-2.1839	6.5e-99
						21395018	71.3003	500.997	-2.81689	2.73219e-35		21407113	127.353	578.67	-2.18378	1.86e-53
						novel.298	1.93682	13.7698	-2.81631	0.00392567		21402231	101.282	460.063	-2.18372	2.35e-37
						21406823	18.7553	131.47	-2.81387	3.06895e-19		21401789	134.363	609.541	-2.18142	2.73e-36
						21389368	8.20056	57.4548	-2.80993	1.83231e-08		21393630	3.22515	14.6193	-2.18125	0.0259267
						novel.1080	3.25478	22.8881	-2.80845	0.000655322		21408716	110.616	500.489	-2.17799	7.97e-42
						21384338	3.23236	22.7914	-2.80692	0.000276594		21395979	8.35943	37.8033	-2.1754	0.000243783
						21410547	17.1915	119.573	-2.80547	4.12643e-15		21406940	11.945	53.8263	-2.17301	1.12e-06
						21392458	2.56913	18.107	-2.80032	0.00131645		novel.164	2.58214	11.5998	-2.16801	0.0275927
						21384057	1.98968	13.7348	-2.79892	0.00667505		21388393	15.7753	70.9479	-2.16782	3.19e-08
						21393633	51.7067	360.129	-2.79735	8.14099e-22		21384336	45.1613	202.613	-2.16571	9.94e-20
						21394141	144.795	1006.02	-2.79695	8.42755e-83		21405671	109.844	492.292	-2.16348	2.71e-31
						21393970	11.7576	81.5494	-2.79211	4.07742e-12		21407331	53.8469	240.912	-2.16168	3.18e-25
						21406208	39.1767	269.468	-2.79104	1.41038e-26		21386616	2.90132	12.961	-2.15905	0.0226289
						21401734	70.3942	485.876	-2.78704	1.20687e-56		21391453	2.90818	12.9512	-2.15664	0.021873
						112091871	26.4463	181.481	-2.78583	4.72077e-21		21402967	76.3387	340.202	-2.15524	4.66e-23
						21387058	32.8726	225.946	-2.7838	5.79075e-25		21393356	16.1006	71.6636	-2.15298	1.3e-07
						21404169	25.3118	174.946	-2.78188	1.05421e-22		21397505	202.653	900.261	-2.15156	3.88e-48
						21386148	1.33543	9.07592	-2.78184	0.026115		21403540	144.097	637.896	-2.14614	4.79e-45
						21388522	7.2915	49.6633	-2.77894	2.96946e-08		21392960	37.0609	163.75	-2.14351	7.86e-17
						21409783	71.4608	489.827	-2.77505	4.51021e-45		21390377	77.0848	340.382	-2.1427	3.03e-33
						21410685	3.95742	26.9031	-2.77108	7.97989e-05		112091117	63.5219	280.327	-2.14182	9.41e-06
						21401992	12.9389	88.9053	-2.77046	5.81701e-13		21404344	10.9661	48.371	-2.14156	2.36e-06
						112094892	1.99417	13.4251	-2.76471	0.00578113		21408957	42.9185	188.278	-2.13359	1.5e-18
						112092476	6.88409	45.9946	-2.76466	0.000344126		21404445	2.26148	9.89988	-2.13122	0.049584
						21409286	175.766	1192.49	-2.76096	4.29975e-101		21402439	33.2123	145.483	-2.13065	6.57e-14
						21387540	3.38245	22.4841	-2.76002	0.00054524		21398715	7.41436	32.4212	-2.12802	0.000187319
						21391146	2.29286	15.4472	-2.75233	0.00317522		21390592	2.57295	11.2632	-2.12777	0.0373118
						21409284	48.2031	325.076	-2.75076	2.09448e-28		21407509	5.80179	25.3353	-2.12509	0.00168655
						novel.541	2.05151	13.434	-2.7437	0.0153015		21396338	54.5022	237.675	-2.12465	1.34e-25
						21399117	6.61529	44.021	-2.74231	1.19718e-06		21391147	12.5816	54.7891	-2.12344	1.56e-06
						21401139	293.03	1957.85	-2.73831	2.0227e-84		21399975	57.3963	249.736	-2.12122	6.4e-21
						21403090	1.58078	10.6933	-2.73408	0.0424521		novel.911	65.439	284.4	-2.11946	3.32e-26
						21396513	191.281	1271.79	-2.73332	2.29481e-113		21410665	227.455	985.983	-2.11618	7.01e-58
						21392882	5.84538	38.9787	-2.73206	0.000115071		112091455	13.8536	60.0026	-2.11412	1.86e-07
						21392925	108.187	717.864	-2.73096	1.40064e-67		21400972	529.987	2292.57	-2.11283	4.28e-126
						21399822	62.1662	410.23	-2.72843	1.09941e-38		21392075	10.6408	45.9695	-2.11142	1.17e-05
						21384475	16.644	109.38	-2.72464	3.91437e-09		21393633	84.7622	365.662	-2.10899	2.4e-21
						21398693	52.6851	345.702	-2.72207	9.50289e-22		21394393	13.1953	56.9466	-2.10821	2.34e-06
						21402436	224.946	1483.7	-2.72084	1.53845e-94		21389253	8.70838	37.5485	-2.10808	5.53e-05
						112090411	2.29286	15.1131	-2.72076	0.00328312		21410772	72.4431	312.36	-2.10773	1.71e-19
						21386831	242.622	1601.23	-2.72035	7.01182e-83		112091103	339.545	1461.8	-2.10617	1.78e-16
						21398104	26.9384	177.066	-2.71936	3.05891e-22		21396014	35.8183	154.041	-2.10515	7.59e-16
						21392890	351.562	2312.18	-2.7177	3.12494e-113		21389687	19.028	81.8044	-2.10426	5.59e-10
						21389518	17.6263	116.04	-2.71664	1.30446e-14		21398239	20.6222	88.6958	-2.10399	1.17e-09
						21409174	55.3754	364.794	-2.71607	5.44701e-42		21401195	125.353	538.605	-2.10271	1.67e-36
						21388374	95.525	627.3	-2.71487	3.15303e-50		21400580	17.0863	73.332	-2.10129	5.46e-09
						21407838	1.35737	8.70481	-2.7121	0.0380704		21407210	61.6003	264.217	-2.10083	4.98e-23
						21397881	9.76387	64.1464	-2.71049	5.88808e-10		21393970	19.3301	82.8221	-2.0986	1.68e-09
						21401808	7.15934	46.9895	-2.70917	1.70011e-07		21396140	14.4788	62.0599	-2.09834	4.57e-06
						novel.188	1.65158	10.7303	-2.70803	0.0150596		novel.4	94.1799	403.123	-2.0978	4.2e-31
						21395747	10.0636	64.9583	-2.70656	3.07367e-07		21394553	2119.77	9071.8	-2.09747	7.91e-102
						21408953	80.7314	526.99	-2.70591	2.09625e-26		21401260	7.7442	33.0614	-2.09455	0.000200633
						21395442	62.1069	404.632	-2.70024	2.42504e-30		21405370	8.36777	35.7603	-2.09439	0.000211066
						21394692	112.824	731.446	-2.69911	1.13166e-55		21409793	71.6101	305.458	-2.09293	1.38e-21
						21391175	6.99729	45.009	-2.69793	6.30898e-06		112091224	127.026	541.462	-2.09193	2.49e-33
						21399986	39.6364	256.859	-2.69655	2.77211e-25		21405520	125.091	532.563	-2.08973	4.96e-43
						21384440	1.26911	8.37571	-2.69622	0.0437895		21393722	84.4581	359.465	-2.0895	1.15e-33
						21410833	17.3082	111.633	-2.69468	0.00395254		112093519	24.8237	105.487	-2.08675	2.58e-11
						21394170	50.8735	329.226	-2.6914	6.49663e-33		21402424	29.354	124.645	-2.08672	2.46e-12
						21388782	54.3252	349.019	-2.68969	7.55219e-27		novel.699	15.4875	65.7537	-2.08662	1.99e-07
						112091455	9.14854	59.0835	-2.68956	1.90918e-08		21407056	141.513	600.539	-2.0852	2.07e-53
						21400554	44.6984	289.54	-2.68928	6.34577e-25		21404611	246.924	1047.48	-2.08456	3.11e-70
						21404588	13.9592	89.3264	-2.68914	2.60567e-11		21391890	10.3109	43.6737	-2.08179	1.45e-05
						21408970	59.1283	381.609	-2.68851	5.2454e-45		novel.381	5.16428	21.8585	-2.08174	0.00352107
						21399363	4.30898	27.5429	-2.68709	5.67381e-05		21394169	90.812	384.021	-2.07971	1.61e-23
						21404629	8.61395	55.1237	-2.68607	6.12028e-07		112094764	15.4975	65.4409	-2.07914	2.29e-07
						21401982	31.2783	200.556	-2.68517	3.30357e-24		21403167	3.55573	14.979	-2.07683	0.0243126
						112091396	9.14454	58.7026	-2.68043	1.79015e-09		novel.855	78.0511	327.505	-2.06922	4.71e-24
						21395672	45.8374	293.744	-2.67996	9.75208e-39		21404398	415.234	1738.81	-2.06594	7.1e-86
						21408873	34.4738	220.16	-2.67662	2.71804e-18		112090841	8.70606	36.4082	-2.06474	0.000140633
						21409788	14.7007	94.0355	-2.67527	3.96539e-14		21396807	18.6941	78.1667	-2.06329	7.2e-09
						21400935	581.216	3711.28	-2.67526	5.56313e-99		21387607	241.108	1007.24	-2.06243	1.14e-57
						21403346	49.5933	316.358	-2.67511	1.21906e-30		21385359	23.5263	98.1306	-2.0602	3.81e-11
						21403041	71.3118	454.738	-2.67209	5.95606e-52		21403059	47.7393	198.903	-2.05885	2.09e-20
						21401949	3.7031	23.1921	-2.66951	0.000508619		21387956	487.795	2031.34	-2.05804	2.84e-105
						21408270	30.8894	196.991	-2.66753	2.67718e-25		21388593	66.0923	275.147	-2.05753	5.62e-26
						21385134	44.3763	280.873	-2.66497	1.72177e-31		21388142	9.98171	41.5736	-2.05751	0.00016816
						112093057	6.90454	43.6763	-2.66462	8.09426e-07		21390940	40.2844	167.725	-2.05743	1.01e-17
						112094334	8.32422	52.3224	-2.66428	1.07162e-06		21388825	19.9755	83.1635	-2.05722	7.17e-09
						21394615	43.2802	275.064	-2.66336	7.67466e-32		21407786	1577.92	6558.21	-2.05523	5.25e-89
						21401031	15.4701	97.6755	-2.66293	8.32769e-14		21397982	4.1908	17.4077	-2.05385	0.00884737
						21398445	261.081	1653.67	-2.66274	1.07951e-104		21393104	18.9943	78.7831	-2.05123	1.56e-07
						21405215	17.1257	107.803	-2.65911	1.04706e-15		21393041	11.922	49.3573	-2.04957	6.75e-06
						21409276	2.92966	18.5044	-2.65342	0.00168875		21404394	38.6765	159.587	-2.04442	4.31e-17
						21404611	163.9	1031.41	-2.65322	2.92618e-85		21386896	79.2913	327.088	-2.04407	6.48e-30
						21387130	9.62825	60.0602	-2.6528	7.64532e-09		21394945	17.4279	71.7767	-2.04325	3.7e-07
						21403312	7.19875	45.2557	-2.65219	2.69672e-07		21389478	15.7984	65.0749	-2.04244	1.49e-07
						21409584	5.55165	34.923	-2.65088	7.44574e-06		112094630	83.6419	344.457	-2.04222	1.88e-05
						21408246	7.86198	49.3587	-2.65078	5.65228e-08		21406852	2.89826	11.9444	-2.04183	0.0429617
						21403273	23.2393	145.634	-2.64757	1.2468e-18		21410042	116.287	478.961	-2.04174	3.81e-30
						21401995	63.4772	397.654	-2.6468	1.2841e-44		21403828	151.883	624.806	-2.04041	7e-44
						21407112	51.8977	325.281	-2.64602	4.72031e-28		21383736	5.80791	23.8486	-2.03854	0.0017747
						novel.554	36.1873	225.971	-2.64536	1.66731e-19		21407115	268.584	1099.86	-2.03372	1.93e-71
						novel.413	2.22206	14.1039	-2.64031	0.00827323		21405551	7.75265	31.6808	-2.03232	0.000624258
						21397407	12.1445	75.6065	-2.64011	2.88726e-11		21408455	94.8065	387.771	-2.03211	1.7e-30
						21398911	207.972	1294.72	-2.6397	2.78228e-52		21397487	19.0026	77.6375	-2.03009	2.79e-08
						21410271	20.4638	126.736	-2.63656	4.12259e-14		21390395	88.9794	363.47	-2.02993	1.02e-30
						21399931	7.13692	44.5094	-2.63455	4.89325e-06		21397422	39.679	161.614	-2.02639	9.5e-17
						112095203	660.01	4098.3	-2.63359	3.47065e-42		21393972	4.19239	17.0378	-2.02315	0.0100229
						21404985	3.96639	24.4634	-2.63356	0.000197375		112090808	10.647	43.2375	-2.02269	2.64e-05
						21384434	1.94579	12.0801	-2.62582	0.011425		21396024	41.5846	168.796	-2.02091	2.97e-16
						21398684	476.702	2940.23	-2.62501	6.03424e-147		21383934	5.81035	23.5593	-2.01992	0.0031996
						21401505	22.8359	140.026	-2.62395	6.7378e-16		21391053	15.4899	62.7432	-2.01865	2.59e-07
						112092602	130.629	804.744	-2.62309	4.56834e-76		21405989	9.02778	36.4801	-2.0146	0.000388623
						21405740	17.02	104.569	-2.61851	5.572e-14		21384710	3.54728	14.3344	-2.01441	0.0207774
						21390590	281.815	1730.88	-2.61812	1.02417e-93		21405084	625.124	2519.52	-2.01084	2.85e-56
						21393417	150.14	919.022	-2.61453	2.46958e-84		21387029	35.4563	142.715	-2.00842	8.16e-13
						21409897	68.6733	420.516	-2.61344	4.27507e-41		21400018	14.1643	57.0325	-2.0081	1.6e-05
						21386586	14.8159	90.3189	-2.61213	8.81842e-12		21391827	21.5679	86.7212	-2.00635	1.1e-06
						21394712	13.3164	81.4978	-2.60789	4.94323e-10		21400846	6.12466	24.6	-2.00511	0.00310969
						112092301	41.7005	253.479	-2.60601	1.92738e-32		21400164	190.499	764.323	-2.00413	5.12e-52
						21398116	6.25028	37.8905	-2.60435	2.59363e-06		21386586	22.9019	91.7254	-2.00205	2.49e-10
						21399425	58.4656	354.91	-2.60419	2.73344e-42		21388512	15.1262	60.6021	-2.00142	4.08e-06
						21386594	19.5891	119.199	-2.60281	8.11924e-17		21403308	6.12709	24.5171	-2.00098	0.00167026
						21405761	29.0164	175.516	-2.60216	1.15475e-21		21384098	155.644	623.091	-2.0009	4.02e-42
						21390605	199.091	1208.13	-2.59894	2.87297e-82		21383749	4.18479	16.7378	-1.99823	0.0214619
						21407258	46.4592	279.712	-2.59747	2.37886e-23		21396366	19.0258	75.5454	-1.98996	6.81e-08
						21386468	3.99731	23.9133	-2.59361	0.000629628		21392182	3.86856	15.348	-1.98789	0.0198371
						21403642	2.60005	15.7302	-2.5918	0.00622034		21409243	583.836	2314.32	-1.98682	5.05e-55
						21391075	8.24397	49.5428	-2.59154	0.000113352		112091453	12.9001	51.1211	-1.98677	3.67e-06
						21392277	40.1681	241.338	-2.59125	3.04498e-29		21402436	380.584	1506.9	-1.98505	5.62e-50
						novel.1136	10.6236	64.5488	-2.59101	1.06006e-07		21403872	785.68	3109.51	-1.98463	3.67e-108
						21402367	45.4958	274.131	-2.59091	1.5254e-26		21394514	221.052	874.195	-1.98325	2.93e-50
						21392871	1.70444	10.0383	-2.59046	0.0356032		novel.962	78.397	309.868	-1.98315	3.07e-27
						21400410	8.33271	49.6681	-2.58996	3.25634e-07		21405495	33.5113	132.489	-1.98295	3.62e-13
						21400051	231.007	1389.08	-2.58951	6.18596e-38		21398137	18.7065	73.8693	-1.98207	3.71e-08
						21393614	452.331	2720.66	-2.58731	1.42498e-91		21395356	318.164	1256.55	-1.98158	6.83e-08
						21393674	532.061	3194.27	-2.58686	1.10039e-95		21398386	18.7389	73.9413	-1.9815	6.04e-06
						21395579	115.576	695.07	-2.58661	3.05723e-59		21390252	28.052	110.766	-1.98139	5.85e-11
						21389205	15.7269	95.0905	-2.58301	6.61254e-10		112092256	79.5859	314.112	-1.98041	3.74e-25
						21390875	75.9618	455.697	-2.58182	6.94308e-46		21388370	159.139	627.467	-1.97899	7.53e-31
						21407551	7.43161	44.7147	-2.57921	1.05298e-05		21389948	3.5496	13.9746	-1.97769	0.0280641
						21384098	102.852	613.556	-2.57697	3.48589e-61		21407161	119.673	470.924	-1.97655	1.76e-35
						112092713	41.2163	245.3	-2.57243	2.60258e-27		21393490	168.31	662.055	-1.97592	7.54e-50
						novel.689	7.26507	42.9704	-2.5715	1.17966e-06		21387637	366.032	1439.01	-1.97519	4.16e-71
						21400702	27.6875	164.903	-2.57118	2.40878e-17		21387717	5.80559	22.8086	-1.97472	0.00322517
						112091219	57.0743	340.147	-2.56971	1.75517e-29		21394130	12.584	49.4325	-1.97438	6.64e-06
						21388438	1.6471	9.73706	-2.56909	0.0219829		21390862	9.36966	36.7341	-1.9729	0.000581755
						novel.25	7.92829	46.6472	-2.56438	3.3156e-07		112094225	6.76925	26.5687	-1.97269	0.00151205
						21392505	28.9915	171.511	-2.56141	5.22822e-17		21404536	12.2688	48.1221	-1.97229	1.88e-05
						112095101	10.1987	59.9799	-2.55865	8.52756e-07		21389918	29.3455	114.976	-1.96999	2.72e-10
						21410426	6.55747	38.5693	-2.55777	3.84195e-06		21385481	10.0033	39.1619	-1.96975	0.000288544
						21386171	3.68563	21.4087	-2.55482	0.00350951		21395623	275.57	1077.56	-1.96705	7.93e-49
						21409392	202.982	1189.64	-2.55305	3.34776e-48		21399108	272.267	1064.13	-1.96628	7.27e-35
						21403828	105.125	615.241	-2.54911	4.87926e-45		21401418	6.45705	25.2075	-1.96604	0.00259355
						21392946	2.05151	11.7238	-2.54762	0.0267529		112090431	5.15509	20.1521	-1.96565	0.00601619
						21393059	1.95028	11.4502	-2.54721	0.0284539		21396564	296.627	1158.15	-1.96504	7.05e-82
						21404737	148.727	868.251	-2.54577	1.26231e-67		21396515	761.352	2967.73	-1.96265	1.42e-93
						21409623	1539.2	8977.67	-2.5441	1.09339e-05		21391260	25.1543	97.9621	-1.96209	3.89e-09
						21390210	27.4107	159.896	-2.54266	4.57756e-14		21408356	1820.27	7089.4	-1.96147	5.15e-72
						21387859	136.63	795.839	-2.54263	2.33579e-75		21408917	9.991	38.888	-1.96008	0.000101645
						21397376	18.3549	106.456	-2.53666	5.26125e-06		21394835	48.0537	186.943	-1.95982	3.56e-18
						21392468	18.3514	106.375	-2.53588	2.02312e-12		21391143	58.0023	225.61	-1.95899	7.08e-18
						21399563	82.5326	477.841	-2.53361	1.07622e-26		21391813	408.121	1586.45	-1.95871	8.74e-75
						21394676	34.5496	199.124	-2.53063	1.93238e-23		21408602	103.558	401.721	-1.95611	2.32e-26
						21394015	44.8675	258.324	-2.52917	1.5076e-19		21408012	132.586	512.824	-1.95188	1.72e-35
						21410359	12.4696	71.8783	-2.52888	2.71676e-10		21407114	419.383	1622.32	-1.95161	2.39e-86
						21398857	116.267	669.254	-2.5266	3.8066e-44		21399890	10.3158	39.8829	-1.95078	0.000157438
						21392961	37.7445	216.144	-2.52523	2.59783e-22		21389264	216.427	834.408	-1.94697	1.79e-45
						21404409	12.2458	70.0668	-2.52447	2.31658e-08		21408601	221.662	853.966	-1.94609	1.28e-43
						21399799	21.5314	123.956	-2.52367	1.28547e-09		21390813	35.7616	137.795	-1.94545	5e-11
						21406256	16.4919	95.3396	-2.52218	2.06031e-11		21405297	114.457	440.597	-1.94471	1.59e-36
						21393063	39.6445	226.32	-2.51367	6.29256e-29		21409110	192.159	738.888	-1.94295	6.36e-58
						21397197	367.424	2097.32	-2.51264	9.81365e-72		21410224	15.4739	59.3389	-1.93887	1.42e-06
						21396338	41.1116	234.029	-2.51234	2.87257e-26		21390711	11.2901	43.2479	-1.93806	0.000385908
						21393356	12.3021	70.5672	-2.51161	1.2383e-08		21409356	5.15731	19.7454	-1.93699	0.0108009
						21410273	17.9171	101.506	-2.5112	2.01764e-11		21397437	154.067	589.892	-1.93666	2.89e-36
						21385344	17.955	102.355	-2.509	9.94389e-13		21399410	48.9941	187.138	-1.93321	2.53e-17
						112092158	5.49879	31.4839	-2.50816	6.75716e-05		21391450	4.8375	18.4225	-1.92902	0.00876034
						112092312	3.72953	20.8582	-2.50815	0.00326651		21396262	50.6129	192.758	-1.92884	2.76e-18
						112090611	21.7374	123.229	-2.50769	1.64566e-15		21403849	45.4565	173.03	-1.92809	2.42e-14
						21412618	62.6789	355.31	-2.50724	5.13299e-28		21396792	3.86867	14.698	-1.92472	0.0242005
						21395248	180.371	1024.26	-2.5055	6.55394e-35		novel.482	11.9404	45.2303	-1.92273	5.76e-05
						21396343	82.9152	468.56	-2.50359	4.10558e-38		112091386	156.169	591.847	-1.92201	8.64e-07
						novel.143	2.22655	12.7993	-2.49961	0.0175409		21412090	207.214	784.659	-1.92079	2.04e-41
						21396125	4.03271	22.477	-2.49695	0.00262054		21409357	40.9452	154.615	-1.91654	8.95e-13
						112095046	8.63141	48.2917	-2.49495	1.41067e-06		21396136	63.5811	239.731	-1.91517	2.5e-16
						21394152	32.2662	181.346	-2.49475	2.70454e-21		21400503	1164.08	4375.18	-1.91013	4.7e-91
						21384416	54.9002	310.355	-2.49418	7.13558e-28		112092636	6.44922	24.2271	-1.90917	0.00321676
						21396930	9.90949	55.4495	-2.49104	9.87177e-08		21410070	36.0886	135.512	-1.90806	2.24e-11
						21407331	42.1657	237.23	-2.49099	2.63642e-27		21400731	468.684	1758.64	-1.90766	1.14e-74
						21384131	3.86019	21.8698	-2.48903	0.00258527		21401954	42.2229	158.213	-1.90542	1.66e-15
						21395725	20.9873	117.753	-2.4886	9.8652e-09		21394469	820.15	3068.07	-1.90332	4.32e-60
						21401029	21.7673	122.487	-2.48631	9.03702e-16		21397144	27.0597	101.163	-1.90208	1.16e-09
						21396995	26.2154	145.727	-2.48515	1.21193e-08		21404832	275.816	1030.2	-1.90102	9.68e-33
						21406940	9.44724	53.0069	-2.48438	1.72759e-07		21408605	32.5453	121.38	-1.89855	8.83e-11
						21396896	66.4712	371.714	-2.48344	2.0751e-38		112090974	569	2120.83	-1.89808	2.62e-52
						21407056	105.8	591.347	-2.48303	3.8856e-57		21411363	19.6395	73.231	-1.89807	9.74e-06
						21386084	5.61797	31.1835	-2.48069	5.70793e-05		21397357	8.70458	32.3641	-1.89466	0.000493093
						21387611	33.9158	189.619	-2.48009	4.27981e-23		novel.1118	8.07172	29.9447	-1.89285	0.00122371
						21399752	3845.57	21424.3	-2.47798	3.92434e-65		21400878	22.5639	83.7603	-1.89238	9.52e-08
						21408254	15.7948	87.5826	-2.47545	5.12476e-12		21411279	4.51231	16.7351	-1.89003	0.0166892
						21393081	17.3197	95.5787	-2.47397	6.70077e-09		112090794	3.87712	14.343	-1.88817	0.0321129
						21402185	19.7916	109.492	-2.4732	1.17849e-12		21401325	3.87026	14.3231	-1.8879	0.0297486
						21391660	22.778	126.506	-2.46917	3.94961e-14		21399396	13.5068	50.0234	-1.88784	0.000237471
						21402439	25.9411	143.245	-2.46681	5.01367e-15		21390188	26.7769	98.879	-1.88497	3.57e-09
						21394548	33.5667	184.929	-2.46576	7.37771e-22		21386863	12.5894	46.3795	-1.88192	7.86e-05
						21407985	13.1608	71.6915	-2.45998	9.09577e-06		21400641	40.9259	150.47	-1.87838	4.53e-12
						21401042	48.6115	265.968	-2.45794	3.66831e-24		21402620	633.282	2327.2	-1.87755	2.5e-59
						21404133	23.8008	131.035	-2.45738	2.24388e-16		21406974	30.6037	112.466	-1.87721	1.04e-09
						21386247	2.94712	16.1749	-2.45552	0.0059744		21392277	66.7665	245.086	-1.87633	9.53e-22
						21403666	3.63678	19.8436	-2.45534	0.00211949		novel.1028	31.9275	117.077	-1.87436	3.44e-10
						21390860	22.1807	121.81	-2.45453	1.60972e-14		21401135	34.4771	126.199	-1.87137	1.32e-11
						21404400	12.7255	69.0292	-2.45406	3.27186e-07		21384227	31.5946	115.605	-1.87128	2.22e-09
						21397402	25.2425	138.014	-2.45182	9.54068e-18		21392905	191.002	698.547	-1.87053	1.76e-25
						112095235	1.96325	10.736	-2.45087	0.0243945		112094471	11.2714	41.1933	-1.86929	0.000138518
						novel.665	1.97222	10.7463	-2.4492	0.0199697		112090560	3.53957	12.9399	-1.86907	0.0432619
						21404490	7.91484	42.9071	-2.44383	3.43653e-05		21397360	182.429	665.391	-1.8665	6.46e-39
						21398208	5.69278	30.5487	-2.44111	0.000180216		21384736	24.52	89.2426	-1.86442	1.46e-08
						21397160	196.037	1060.82	-2.43762	5.59484e-47		21386043	23.5226	85.6335	-1.86343	2.11e-08
						21409357	28.0669	152.227	-2.43707	3.67361e-14		21399776	19.0157	69.2035	-1.86334	3.36e-07
						21389021	34.8388	189.03	-2.43577	5.61346e-21		21392234	270.336	983.294	-1.86258	3.24e-37
						21385655	43.4842	233.535	-2.4297	3.48825e-26		21393558	62.5602	227.241	-1.86073	2.83e-19
						21388512	11.0195	59.6801	-2.42948	4.4265e-08		21395230	14.504	52.6301	-1.85843	2.4e-05
						21395457	7.849	42.291	-2.42884	1.59582e-06		21412228	41.5666	150.774	-1.85838	1e-10
						21386528	53.9188	289.754	-2.42447	1.39275e-33		21405755	469.724	1702.96	-1.85811	1.2e-79
						21405520	97.8369	524.381	-2.42355	1.17765e-38		21405308	44.83	162.421	-1.8571	1.14e-13
						21402368	24.0831	128.185	-2.41756	5.662e-14		21384131	6.13248	22.2144	-1.85686	0.00631401
						21407149	10.4326	55.1133	-2.41743	1.42794e-05		21412808	2247.9	8140.23	-1.85653	8.87e-150
						21393011	31.7172	168.578	-2.41631	6.69978e-18		21389427	6.77611	24.5138	-1.85601	0.00328791
						21392115	15.9962	85.4333	-2.41539	2.54951e-10		21400038	18.0644	65.2601	-1.85267	2e-06
						21396148	127.681	681.569	-2.41467	1.06826e-56		21400935	1044.03	3769.14	-1.85206	2.17e-12
						21383880	949.5	5057.75	-2.41388	1.62279e-68		21387219	15.7828	57.0102	-1.85183	2.36e-05
						21400734	8.33271	43.9721	-2.41371	3.91492e-06		21404718	5.47575	19.7694	-1.85146	0.0115345
						21398525	2.68383	14.0862	-2.41066	0.0148475		21409452	3.86022	13.9336	-1.85115	0.0435243
						21400968	44.4761	235.838	-2.40999	1.93031e-18		21391181	19.6676	70.9027	-1.85	1.4e-06
						novel.270	9.64171	50.7638	-2.4077	1.08024e-06		21397383	950.356	3421.74	-1.84818	2.44e-76
						21407217	37.7775	200.105	-2.40747	5.97729e-21		21398114	54.1751	194.831	-1.84675	1.6e-13
						21394936	34.1915	180.206	-2.4059	2.46431e-15		21400699	12.9031	46.3221	-1.84458	3.43e-05
						21400846	4.55881	24.2186	-2.40469	0.000859122		21389056	7.40824	26.6264	-1.84447	0.00274086
						21394945	13.2989	70.6856	-2.40386	2.09007e-08		21402614	68.3184	245.322	-1.84411	2.93e-20
						21387021	2.39859	12.4027	-2.40286	0.0301715		21403404	8039.08	28811.4	-1.84154	6.47e-15
						novel.37	2.5781	13.7599	-2.40262	0.00920424		novel.584	52.2806	187.103	-1.83961	1.47e-11
						21385522	8.96951	47.0483	-2.4022	1.55918e-06		21394246	5.15288	18.4421	-1.83831	0.0247651
						21398237	6.25028	32.9542	-2.40191	3.84039e-05		21390828	583.149	2085.36	-1.83829	9.05e-65
						21404085	50.1334	264.202	-2.40171	6.17801e-20		21404778	1335.38	4774.74	-1.83815	1.31e-84
						21410463	14.9301	78.2042	-2.39931	5.78031e-10		21405969	213.748	764.281	-1.83812	1.9e-52
						novel.668	5.49879	29.1878	-2.39821	0.000112596		21387130	17.0857	60.9951	-1.83589	2.43e-06
						21388358	35.8326	188.29	-2.3968	1.10872e-22		21400879	103.818	370.499	-1.83561	1.12e-24
						21395535	10.5548	55.3178	-2.39613	1.33531e-07		21384152	5.16206	18.4219	-1.83558	0.0129704
						21391757	5.52522	29.1733	-2.39492	0.000156815		21409619	213.363	761.4	-1.83533	8.75e-34
						112095031	5.06495	26.2288	-2.39424	0.000981958		21398045	28.6734	102.254	-1.83394	8.8e-08
						112095303	63.706	334.777	-2.39419	0.00205857		21385398	6.13776	21.8627	-1.83332	0.00950022
						21400170	66.8412	351.111	-2.39367	2.88409e-37		21392739	101.553	361.882	-1.83305	5.24e-29
						21401222	39.6395	208.058	-2.39253	9.24237e-24		21409201	84.7812	301.989	-1.83257	1.98e-25
						21393399	5.55614	29.1766	-2.39147	9.11163e-05		21405363	12.2648	43.6531	-1.83212	8.3e-05
						novel.511	2.75014	14.1055	-2.39039	0.0274168		21385604	4.50618	16.0655	-1.83202	0.0309282
						21395062	12.6133	66.5157	-2.39033	1.94777e-07		21385227	30.9635	110.204	-1.83148	4.8e-10
						21395333	18.0831	94.5665	-2.39026	5.15657e-12		21395535	15.806	56.175	-1.83017	6.35e-06
						21396200	2.63545	13.7558	-2.38939	0.00852123		21407855	3.55108	12.6173	-1.82984	0.0436846
						21409611	204.137	1069.67	-2.38847	1.83223e-65		21401982	57.395	203.668	-1.82745	7.71e-15
						21394256	15.3594	80.4853	-2.38843	3.09554e-10		112091212	11.6159	41.1761	-1.82675	0.000156672
						112093673	2.33675	12.1113	-2.38817	0.0242823		21400279	8.36408	29.7032	-1.82669	0.00628284
						21402964	5.83737	30.587	-2.38265	0.000596454		21408326	37.7874	134.006	-1.82654	0.00607721
						112090954	16.4889	85.5583	-2.38128	4.259e-11		21393609	642.595	2278.4	-1.82618	4.38e-66
						21386609	182.683	953.269	-2.38125	5.52648e-52		21409194	50.2974	178.166	-1.8248	5.8e-14
						21406688	62.5263	324.361	-2.38103	7.39417e-27		21406366	52.8686	187.115	-1.82336	2.98e-16
						21402106	18.5703	96.932	-2.3804	7.96425e-12		21401029	35.1682	124.39	-1.82305	2.14e-11
						21387903	9.47415	49.4008	-2.38036	5.98402e-07		novel.84	30.6372	108.354	-1.82266	8.32e-10
						21396140	11.6917	61.114	-2.37988	1.12761e-07		21385655	67.0877	237.162	-1.82207	4.23e-20
						21398410	2627.51	13657.2	-2.37796	2.76922e-81		21390920	114.134	403.323	-1.82113	2.07e-30
						21408669	49.6273	258.142	-2.37694	3.659e-28		21404506	3.8655	13.6633	-1.82027	0.0436846
						21395083	70.8485	366.924	-2.37648	6.91168e-31		21393469	199.24	703.13	-1.81934	4.08e-39
						novel.36	1.92785	10.0773	-2.37173	0.0445502		21396896	107.053	377.508	-1.8181	1e-30
						21386340	27.6979	142.813	-2.37102	2.99801e-15		21393417	264.71	933.333	-1.81788	3.1e-60
						112090974	403.93	2088.28	-2.37101	1.46986e-47		21390183	25.8087	90.8911	-1.81702	3.6e-08
						112094758	4.83556	25.1472	-2.36658	0.000590231		21392007	68.3409	239.997	-1.8124	1.01e-17
						21385458	6.14408	31.8846	-2.36639	0.000171333		21394961	28.6919	100.666	-1.81126	5.27e-07
						21383919	3.04435	15.4336	-2.3655	0.013361		112092545	6.12244	21.4878	-1.81069	0.00696585
						21393327	695.904	3580.96	-2.36364	1.22496e-10		112091996	120.269	421.804	-1.81044	3.69e-32
						21396639	83.2857	428.874	-2.36287	4.38962e-36		21410592	6.1348	21.5097	-1.81036	0.0119646
						21391922	8.60498	44.0094	-2.36183	2.38881e-05		21399822	118.896	416.608	-1.80861	6.48e-26
						21399859	43.9769	225.072	-2.36074	1.65396e-16		21389135	43.5417	152.438	-1.8084	5.37e-12
						novel.1244	3.73401	18.8035	-2.35843	0.00560037		21404027	46.0978	161.481	-1.80805	4.99e-13
						21387730	49.7829	254.203	-2.35696	7.67148e-26		21412674	503.325	1759.12	-1.80511	1.29e-53
						21391181	13.5971	69.807	-2.35318	5.24604e-07		21387715	376.825	1314.92	-1.80315	3.57e-38
						21395308	18.5304	95.0464	-2.35308	7.60734e-12		21392026	52.2291	182.21	-1.80286	6.54e-15
						21394246	3.5176	18.1609	-2.35248	0.012436		21406053	68.3121	238.289	-1.80216	5e-15
						21385774	630.033	3217.25	-2.35235	8.89738e-52		21394805	1138.77	3970.62	-1.80182	1.52e-80
						112092143	87.2786	444.756	-2.35078	4.15627e-38		21388239	4.51991	15.7554	-1.80091	0.0340332
						21400580	14.2713	72.2074	-2.34913	6.39572e-09		21395998	188.795	657.692	-1.80028	1.46e-27
						21408763	34.8698	177.084	-2.34726	1.1886e-14		21389115	50.9704	177.284	-1.79859	2.35e-13
						21391220	27.4815	139.485	-2.34618	0.0357806		21389754	201.835	701.168	-1.79646	6.04e-45
						21403432	62.99	319.518	-2.3442	3.51811e-34		21397857	48.6827	169.11	-1.79636	7.83e-15
						21396298	7.23415	36.6118	-2.34285	1.35108e-05		21397054	172.518	598.697	-1.79495	3.9e-41
						21394852	8.1163	41.3467	-2.34229	1.87016e-05		21401611	129.355	448.687	-1.79459	2.79e-32
						112094555	3.56646	18.1403	-2.33829	0.00328264		21401543	53.2025	183.995	-1.79024	8.77e-15
						21408422	649.409	3272.82	-2.33377	3.82168e-45		21410451	97.0486	335.625	-1.78989	6.09e-25
						21384208	7.49296	37.8256	-2.3328	5.32476e-05		21402544	26.4201	91.2657	-1.78825	2.91e-08
						21393677	131.595	660.345	-2.33011	9.75561e-37		21398168	45.415	156.856	-1.78749	4.84e-12
						21395766	23.2368	116.137	-2.32996	4.11676e-11		21387967	333.644	1151.58	-1.78746	4.7e-35
						21387971	730.77	3674.95	-2.32994	1.18141e-69		21404345	122.238	421.933	-1.78734	3.92e-31
						21405749	18.0537	89.8526	-2.32616	1.5511e-07		21387467	88.3883	304.805	-1.78618	1.09e-21
						21387584	298.538	1495.11	-2.3231	1.31848e-60		21384193	32.8198	113.208	-1.78533	8.07e-07
						21394707	4.87993	24.4922	-2.3227	0.00136782		21398336	9.99587	34.4401	-1.78461	0.000895329
						21391413	6.15753	30.9477	-2.32081	0.000147804		21391504	54.8008	188.604	-1.7833	4.64e-15
						21391890	8.7107	43.0007	-2.31971	2.16816e-05		21392934	33.8695	116.523	-1.78298	1.86e-10
						21400995	31.1911	154.767	-2.31958	4.5179e-15		21400664	7.75192	26.6489	-1.78193	0.00497768
						21399066	79.1263	394.818	-2.31826	1.95936e-34		21401022	6.13945	21.0828	-1.78184	0.0193572
						21386266	11.0863	55.3539	-2.31726	4.5915e-06		21396382	37.3878	128.492	-1.78086	3.27e-09
						21404293	15.3285	76.5523	-2.31708	4.98925e-10		21394341	416.923	1432.55	-1.78073	5.7e-52
						21396149	307.999	1533.93	-2.31688	6.9959e-40		novel.850	10.3334	35.4656	-1.77994	0.00132808
						21389375	36.6819	181.813	-2.31485	1.6761e-15		21385300	6.46074	22.1479	-1.77861	0.0178652
						21398398	632.398	3144.2	-2.31302	1.43442e-87		21407042	61.6014	211.096	-1.77735	3.09e-16
						21401019	10.7213	53.3997	-2.31037	8.66313e-07		21392697	200.684	687.698	-1.777	2.72e-32
						21387113	9.93992	48.9478	-2.30905	3.69669e-06		21389043	944.042	3232.17	-1.7755	2.57e-46
						21403939	54.7172	270.444	-2.30576	8.20799e-20		21400029	4.19386	14.3629	-1.77532	0.0385633
						21410999	32.0323	158	-2.30126	4.76302e-18		21394504	853.947	2922.84	-1.77516	6.09e-08
						21389768	330.432	1626.1	-2.29962	1.26712e-57		21410046	39.0054	133.424	-1.7738	1.04e-11
						21388777	12.9299	64.0407	-2.29933	1.43429e-07		21389058	10.9601	37.4757	-1.77372	0.000330162
						21391246	53.4217	261.959	-2.29437	7.68897e-20		21400589	4.19006	14.3145	-1.77222	0.0329246
						112090336	54.1292	265.531	-2.29155	3.27909e-27		21406228	196.922	671.37	-1.7692	1.3e-41
						21399963	86.3137	421.052	-2.2915	3.0866e-16		112091370	9.02535	30.7352	-1.76709	0.0023247
						21398833	6.30763	30.6268	-2.28942	0.000251323		21405788	255.643	869.68	-1.76639	1.64e-46
						21384358	4.84902	23.8627	-2.28926	0.00180088		21385970	23.8743	81.0768	-1.76432	3.56e-06
						21408819	229.909	1120.77	-2.28771	5.31925e-56		21390084	87.3531	296.489	-1.76294	2.2e-21
						112091044	59.7761	289.868	-2.28282	1.52876e-24		21406801	54.4802	184.866	-1.76289	2.34e-14
						21403543	25.5277	123.874	-2.27843	1.66376e-14		21405215	32.2688	109.485	-1.76286	3.24e-09
						21397739	91.8459	444.685	-2.27656	8.30797e-38		21389401	4.52297	15.3088	-1.76097	0.037722
						21392877	26.7713	129.676	-2.27438	1.30338e-10		21411794	57.0688	193.2	-1.75941	1.47e-14
						112095153	10.1239	49.0505	-2.27437	2.44493e-06		21391113	68.3108	231.177	-1.75842	1.6e-14
						21397152	2.28838	11.075	-2.27368	0.0231967		21387755	11.582	39.2151	-1.7581	0.00108763
						21393847	25.9985	125.038	-2.26951	2.81809e-12		21387928	6.75604	22.8463	-1.75618	0.0113268
						21407131	2.31032	11.0882	-2.26919	0.0268708		21396577	175.527	592.088	-1.75433	8.8e-31
						21408742	17.6383	84.9626	-2.26655	9.43848e-09		21393776	4.84816	16.331	-1.75412	0.0420086
						21392788	57.0035	273.051	-2.26401	8.7341e-25		21390910	1320.17	4452.36	-1.75391	1.28e-56
						21385300	4.52389	21.814	-2.26085	0.0055123		21384924	129.236	435.826	-1.75358	2.92e-28
						21406417	22.791	109.481	-2.25988	1.67373e-12		21403531	1571.04	5287.06	-1.75072	5.09e-51
						21385260	45.0335	215.728	-2.25798	9.91638e-22		21386408	14.1748	47.6794	-1.74976	0.000215881
						112090574	4.20726	20.1957	-2.25465	0.00667204		21386831	483.541	1626.14	-1.74961	6.39e-69
						21399586	35.4188	168.483	-2.25126	1.13245e-17		21410445	50.653	169.892	-1.74656	2.57e-12
						21401135	26.0807	124.255	-2.24893	3.48917e-14		21391367	169.252	567.457	-1.7452	2.91e-28
						21390022	7.98366	38.281	-2.2477	0.000867154		21403812	187.671	628.881	-1.74474	2.28e-35
						21395102	11.9475	56.3432	-2.24752	1.03189e-06		21411569	291.633	977.037	-1.7444	3.05e-31
						21403063	38.2188	180.3	-2.24536	1.61857e-12		112094663	12.5634	41.9988	-1.74007	0.000524653
						112092751	414.294	1963.13	-2.244	4.67795e-76		21390569	62.8399	209.928	-1.7399	3.7e-14
						21384907	146.691	691.632	-2.23835	2.17785e-40		21394692	222.726	742.856	-1.73755	6.63e-40
						21400018	11.9964	56.158	-2.23677	2.25637e-05		21401992	27.0867	90.2845	-1.73713	1.93e-08
						21407508	100.233	472.866	-2.23635	7.68249e-39		21398410	4166.39	13870	-1.73509	8.81e-57
						21394185	20.5067	96.7807	-2.23421	1.16544e-10		21394144	55.1286	183.375	-1.73387	2.06e-14
						21405308	33.9826	159.923	-2.23282	1.39948e-17		21403271	6.44616	21.4114	-1.73255	0.0124679
						21398244	15.1495	70.8559	-2.22996	1.18543e-08		21412141	18.7154	62.1728	-1.73195	4.4e-05
						21397681	4.4501	20.5121	-2.22843	0.0186567		21391831	210.601	698.802	-1.73039	2.4e-42
						21406388	202.045	947.568	-2.22783	1.73205e-44		21394524	463.989	1539.51	-1.73019	1.36e-57
						21410176	64.4167	301.714	-2.22721	4.37253e-21		21401505	42.8419	142.202	-1.73017	1.18e-10
						21409605	16.8534	78.5292	-2.2271	4.2208e-09		21407609	23.2053	76.9584	-1.72964	7.93e-06
						21406434	65.4489	306.214	-2.22569	1.8088e-31		21399595	26.4292	87.6215	-1.72882	3.44e-08
						112092934	565.865	2642.51	-2.22449	7.61054e-59		21398198	38.694	128.108	-1.72737	4.25e-11
						21404944	64.3853	300.07	-2.22233	4.45003e-22		21395573	14.501	48.0113	-1.72718	8.94e-05
						21398723	5.25296	24.4441	-2.22099	0.00192115		21389367	4.83761	16.0037	-1.72653	0.0353262
						21405632	7.81061	35.9298	-2.22082	0.00175598		21388584	71.6179	236.944	-1.72644	5.23e-18
						21388166	3.61483	16.8126	-2.22007	0.00567822		21387527	12.235	40.4838	-1.72601	0.000617619
						21392645	5.52522	25.8461	-2.2199	0.000503139		21400494	29.6716	98.1363	-1.72598	3.74e-08
						21406219	37.5551	173.919	-2.2174	7.70224e-10		21396303	5.79408	19.1798	-1.72472	0.0327029
						21407682	58.892	274.378	-2.21718	7.63932e-17		21387012	598.982	1979.37	-1.72445	1.71e-74
						21401527	92.0578	427.242	-2.21667	3.6834e-32		21386199	8.04711	26.6085	-1.72399	0.0055459
						21399378	8.04747	36.9816	-2.21559	0.000239556		21402790	701.846	2318.1	-1.72365	4.21e-87
						21388749	5.70175	26.1713	-2.21469	0.00216374		21403063	55.4724	183.102	-1.72288	1.42e-13
						21400131	87.5793	406.173	-2.21227	6.5657e-31		112092934	813.402	2683.58	-1.72216	4.44e-49
						21402003	2.74566	12.4339	-2.20902	0.0472513		21408768	64.8084	213.807	-1.72196	7.58e-16
						21408141	3.67218	16.8082	-2.20882	0.00874051		21410191	37.4341	123.426	-1.72166	3.79e-09
						21399774	1471.79	6799.47	-2.20828	3.71021e-63		21392114	41.5643	137.089	-1.72119	7.98e-10
						21398494	208.464	961.669	-2.20804	4.06168e-48		21394799	5.79957	19.0695	-1.71709	0.0212941
						21397041	11.8812	54.646	-2.20766	1.3546e-06		21387173	22.255	73.1767	-1.71672	3.08e-05
						112091388	3.26328	15.0707	-2.20554	0.0123764		21408123	238.96	784.604	-1.71521	3.51e-39
						21402733	27.3957	125.837	-2.20524	4.05806e-13		21406708	38.9997	128.033	-1.71505	6.4e-10
						21408650	17.5785	80.535	-2.20487	1.08259e-08		21400838	5.80581	19.0478	-1.71488	0.0286437
						21388043	37.0908	171.167	-2.20213	1.10308e-16		21406633	9.67902	31.7593	-1.7141	0.00229999
						21390360	31.3337	144.03	-2.19821	2.94373e-16		21389680	443.61	1453.52	-1.71214	6.25e-64
						21396240	259.152	1186.81	-2.19681	1.33062e-55		21404021	135.78	444.72	-1.71193	1.24e-22
						21401954	33.9333	155.786	-2.19636	3.94974e-16		21396178	16.1365	52.7862	-1.71071	7.52e-05
						21392086	4.25163	19.4948	-2.19587	0.00557468		21411804	578.258	1888.37	-1.70733	5.58e-60
						21401962	4.90188	22.4755	-2.19567	0.00255077		21406589	17.3995	56.8098	-1.70724	0.000108207
						21410345	117.268	537.354	-2.19467	3.09708e-45		21393503	77.7082	253.633	-1.7066	5.12e-14
						21387889	4175.5	19110.5	-2.19426	1.06439e-144		21401370	7.74273	25.2637	-1.70603	0.0058148
						21394408	456.82	2091.3	-2.19412	1.20906e-60		21399344	7.09751	23.1353	-1.70574	0.0087889
						novel.978	18.6048	85.2316	-2.19367	2.12334e-09		21389395	52.5599	171.407	-1.70554	2.43e-14
						21398821	77.1113	351.438	-2.19311	1.17607e-11		21386015	20.2968	66.203	-1.70482	1.07e-05
						21393852	238.598	1091.08	-2.19297	4.44218e-73		21400602	7.7404	25.2259	-1.7046	0.00488969
						21391733	3.59737	16.4473	-2.19189	0.0081232		21405417	20.613	67.1179	-1.70264	2.14e-05
						21389264	180.306	821.613	-2.19076	3.07131e-43		21400325	42.571	138.428	-1.70128	4.17e-11
						21396297	85.976	393.329	-2.19053	4.48453e-33		21394957	9.33671	30.3785	-1.70069	0.00325899
						21394973	57.3696	262.269	-2.18974	3.08828e-24		21412324	180.653	585.942	-1.6974	4.02e-07
						21399449	20.0818	91.3346	-2.18944	5.59211e-11		21389472	27.4256	88.8576	-1.6968	1.54e-07
						21404506	2.9516	13.4526	-2.18909	0.0147467		21403313	13.8576	44.9124	-1.69668	0.000284191
						21391800	236.968	1080.97	-2.18849	2.61145e-48		21391518	5.46571	17.7175	-1.69512	0.0412421
						112091869	3.86916	17.7729	-2.18798	0.0061142		21412648	398.141	1288.4	-1.69418	2.34e-08
						21404778	1032.94	4701.64	-2.18576	9.04635e-51		21396356	5.79577	18.7689	-1.69408	0.0283947
						21410346	159.374	724.823	-2.18298	1.54575e-44		21388088	10.3172	33.3537	-1.69329	0.00122609
						novel.962	67.4491	305.127	-2.18071	1.39249e-27		21403314	74.1636	239.381	-1.69046	1.19e-17
						21391831	151.917	688.085	-2.17928	1.30216e-42		novel.993	6.13016	19.7698	-1.68976	0.0176854
						21409613	28.3806	127.561	-2.17839	1.38478e-09		21387549	42.2193	136.144	-1.68861	2.12e-10
						21384903	39.0784	177.071	-2.17738	1.39622e-10		21392327	1034.27	3332.07	-1.68778	2.61e-99
						21402140	255.071	1154.84	-2.17689	6.50843e-53		novel.913	14.1898	45.681	-1.68684	0.000321031
						21396582	7.37079	32.9531	-2.17432	0.00109013		21385703	70.5908	227.111	-1.68557	9.44e-16
						21404038	25.8189	115.773	-2.17247	5.20612e-12		21404740	25.1603	80.9174	-1.68508	4.35e-07
						21401326	77.5186	347.799	-2.171	3.28328e-21		21385249	208.596	669.927	-1.68304	1e-32
						21400587	280.18	1261.14	-2.17026	9.90405e-58		112091016	9.67341	31.0603	-1.68258	0.00235938
						21404694	340.622	1532.74	-2.17004	7.82215e-59		21403280	114.773	368.347	-1.68214	2.81e-17
						21409387	240.526	1080.86	-2.16736	5.39365e-07		21393286	158.987	510.015	-1.68141	6.3e-28
						112093840	410.405	1843.31	-2.16618	1.49145e-62		21395254	31.9361	102.055	-1.67603	1.12e-07
						112094663	9.29015	41.353	-2.16346	3.86169e-05		21390104	16.7642	53.5278	-1.67475	2.82e-05
						21402586	295.327	1322.44	-2.16186	1.32157e-69		21404927	98.9256	315.777	-1.67406	6.77e-20
						21384853	2.89426	13.07	-2.16151	0.0216639		21384806	59.6774	190.262	-1.67294	3.21e-14
						21403559	3.73401	16.4194	-2.16123	0.0178397		112094477	745.5	2375.97	-1.67231	1.17e-52
						21404034	26.3969	118.195	-2.15914	2.16967e-13		21398341	31.6041	100.729	-1.67194	1.14e-07
						21409046	437.316	1950.34	-2.1574	1.33049e-08		21397447	6796.89	21624.8	-1.66973	4.15e-79
						21402445	7156.13	31917.4	-2.15708	5.18634e-47		21402118	23.5487	74.8521	-1.66921	5.31e-06
						112092057	413.894	1842.49	-2.15541	3.82567e-61		112094555	5.79039	18.4231	-1.66823	0.0434107
						21409375	59.6374	265.548	-2.15189	1.15228e-21		21385247	51.9579	165.079	-1.66805	2.05e-09
						112091395	61.6496	273.547	-2.15066	5.01832e-24		21405803	5.79799	18.4311	-1.66738	0.0213991
						21387944	14.196	62.7632	-2.15066	2.08546e-07		21410664	57.1029	181.281	-1.6669	3.66e-09
						21388109	68.7721	305.933	-2.15063	2.88293e-24		21398464	19.9991	63.4276	-1.66534	5.33e-06
						novel.855	72.7285	322.494	-2.1504	0.00120667		112094929	20.3376	64.4737	-1.66507	3.11e-05
						21398137	16.458	72.7443	-2.14838	2.16579e-08		21406393	116.022	367.876	-1.66475	1.08e-21
						21409932	18.4731	82.1983	-2.14657	6.06913e-09		21387616	6.10713	19.3764	-1.66468	0.0401834
						21390252	24.7249	109.073	-2.14631	6.77334e-12		21392301	4.83137	15.3195	-1.66458	0.0376771
						21399606	3.24581	14.4186	-2.14475	0.0146435		novel.1148	6.4545	20.4242	-1.66279	0.0317868
						21397021	4.7134	20.485	-2.13936	0.00579861		novel.1034	5.48578	17.3518	-1.6625	0.0289253
						21401792	31.7177	138.984	-2.1378	5.81404e-14		21388273	36.436	115.313	-1.6619	7.64e-09
						21412156	339.132	1490.27	-2.13717	5.57764e-41		21407578	37.716	119.164	-1.65992	1.45e-09
						21409789	328.287	1443	-2.13711	3.30274e-72		21388063	302.388	954.952	-1.65879	4.65e-36
						21409589	8.17813	35.9543	-2.1354	6.88552e-05		21385425	239.826	757.043	-1.65828	2.76e-38
						21398814	70.6775	311.08	-2.13484	2.90254e-24		21389473	120.272	379.368	-1.65711	1.36e-24
						21407115	246.595	1082.93	-2.13419	4.45676e-59		novel.200	14.8623	46.7565	-1.65432	0.00114063
						112092914	27.3159	119.506	-2.13316	2.14532e-13		21400734	14.2012	44.6546	-1.65345	0.000318029
						21403396	3.88261	17.0928	-2.12963	0.00866915		21402969	438.508	1379.04	-1.65297	1.08e-65
						21388741	781.046	3408.31	-2.12606	2.92546e-39		21386411	16034.2	50409.3	-1.65253	3.04e-18
						21395502	1314.74	5734.33	-2.12496	3.78856e-53		21407404	230.522	724.439	-1.6519	5.8e-41
						21395009	3.93099	17.1121	-2.12268	0.00653392		novel.851	34.5168	108.426	-1.65157	1.75e-08
						21395545	125.18	544.527	-2.1215	1.33332e-43		21390590	559.96	1757.78	-1.65028	1.02e-63
						novel.238	2.63545	11.4325	-2.12145	0.0287599		21393415	66.0812	207.333	-1.6494	1.46e-13
						112093519	23.8322	103.863	-2.12132	7.46492e-11		21392201	10.6395	33.3584	-1.64901	0.00273531
						21388194	20.9151	90.973	-2.11966	1.82425e-09		21390853	7.41278	23.2643	-1.64861	0.0127563
						112094569	96.4794	419.373	-2.11917	1.97376e-37		21392608	293.222	919.144	-1.64847	5.18e-44
						21387896	38.9672	168.439	-2.1191	9.57882e-10		21403045	2288.19	7163.56	-1.64647	1.32e-114
						21401328	255.857	1107.34	-2.11502	6.4577e-60		21404334	106.444	332.625	-1.64381	0.00070268
						21394514	198.814	860.797	-2.11356	6.54853e-60		21387591	9.03516	28.2041	-1.64357	0.0106086
						21384820	9.02937	39.182	-2.11106	0.00864807		21403716	314.296	979.245	-1.63929	2.57e-42
						21392588	374.14	1612.86	-2.10785	3.29933e-90		21386597	11.919	37.0146	-1.63517	0.00915007
						21403056	7.56376	32.5104	-2.10744	0.000260051		21409269	15.7936	49.0356	-1.6346	0.000111626
						21410440	256.925	1107.01	-2.1069	6.51088e-31		21386528	94.7969	294.275	-1.63417	3.47e-21
						21392790	361.384	1554.91	-2.10564	1.57576e-06		21405049	369.735	1146.8	-1.63298	1.4e-52
						novel.852	3.73401	15.7722	-2.10326	0.0203559		21388600	8.70543	26.9802	-1.63125	0.00517227
						21401253	3.30316	14.0985	-2.10061	0.0159555		21401060	40.9333	126.708	-1.63016	4.84e-10
						21393013	38.3469	163.494	-2.10027	4.09742e-10		112094475	11.9127	36.8961	-1.62945	0.00220211
						21402440	150.895	647.956	-2.10013	1.29995e-38		21401925	760.088	2351.42	-1.62928	1.7e-64
						novel.222	3.29419	14.0553	-2.09873	0.0198786		21404452	293.038	906.553	-1.62926	7.67e-48
						21388600	6.19293	26.5633	-2.09671	0.000743705		112090627	12.9032	39.8695	-1.62798	0.000663642
						21392916	681.837	2909.35	-2.09379	6.14761e-51		21395528	57.7356	178.347	-1.62725	8.96e-11
						21401705	7319.74	31222.6	-2.09277	2.34843e-59		21401102	47.0715	145.25	-1.6255	9.97e-11
						112093514	191.296	814.953	-2.09207	4.97967e-54		21393133	230.973	711.594	-1.62351	8.5e-37
						21407526	356.037	1515.77	-2.09042	5.36482e-74		112091807	14.1675	43.6888	-1.62346	0.000719894
						21408333	7.12843	30.4981	-2.08985	0.000525165		112091478	14.8287	45.659	-1.6225	0.0002028
						21411792	2.57362	11.0491	-2.08958	0.0434366		21407934	62.169	191.378	-1.6219	1.28e-11
						21407114	375.407	1597.44	-2.08782	2.53893e-58		112094981	61.9156	190.235	-1.61945	3.44e-12
						21401286	500.847	2124.15	-2.085	9.04383e-86		21400837	20.3167	62.3647	-1.61826	2.06e-05
						112090337	26.6642	113.477	-2.08451	7.46466e-12		21396086	32.5547	99.8508	-1.61678	8.09e-08
						21400495	26.722	113.467	-2.08273	3.51757e-12		21404835	15.7875	48.407	-1.61592	0.00015076
						21398168	36.6744	154.45	-2.08198	4.45762e-09		21397116	12.9017	39.5213	-1.61548	0.000739052
						novel.485	16.0381	67.5009	-2.08192	0.000164035		21395757	152.533	467.235	-1.61516	1.67e-27
						21397689	8.50475	35.5194	-2.08072	0.00426099		21388999	58.631	179.672	-1.61509	5.83e-12
						21410170	160.809	678.879	-2.07902	3.78699e-45		novel.1140	5.80633	17.7752	-1.61357	0.0353262
						21401603	38.5903	163.053	-2.07837	2.54776e-16		21393853	18.0561	55.2407	-1.61313	5.32e-05
						21399662	7.87095	33.1773	-2.07739	0.000188699		21385456	93.1482	284.994	-1.61309	1.12e-19
						21385658	146.992	619.799	-2.07738	3.7327e-47		21398244	23.5123	71.958	-1.61302	2.96e-05
						21389531	4.00179	16.7325	-2.07722	0.0171094		21408223	3586.56	10969.6	-1.61282	2.7e-74
						21405668	86.2049	361.084	-2.06991	5.02052e-19		21403994	5.80559	17.7309	-1.61087	0.0280232
						112092462	3.27673	13.7476	-2.06972	0.0243973		21385697	11.3061	34.4993	-1.60998	0.00461137
						21386219	21.1459	88.4486	-2.06909	2.80161e-06		21390272	8.70765	26.5603	-1.60942	0.00782624
						21397396	15.1315	63.2915	-2.06816	1.73596e-06		21384874	369.112	1126.12	-1.60907	7.37e-36
						21388633	13.9626	58.7461	-2.06691	1.13869e-06		21407125	53.5254	163.291	-1.60864	3.71e-10
						21385934	14.1741	59.1732	-2.06617	9.76579e-07		21410194	124.178	378.542	-1.60835	1.75e-23
						21393891	10.0751	42.3416	-2.06599	7.46939e-05		21407990	562.746	1715.29	-1.60796	4.13e-68
						21397638	6.93546	28.9141	-2.06572	0.000726753		21388167	58.671	178.726	-1.60728	3.6e-12
						21410007	21.7688	90.7065	-2.06372	4.57854e-09		21397706	121.569	370.114	-1.60632	5.42e-25
						21390990	157.192	656.539	-2.06328	1.00175e-30		21386703	49.9442	151.961	-1.60505	6.91e-11
						21388826	77.4892	322.982	-2.06129	6.32945e-26		21393768	690.521	2100.42	-1.60493	1.91e-44
						21394144	43.1506	180.572	-2.06076	7.70841e-12		21409216	76.3833	232.315	-1.60429	1.57e-15
						112092338	61.885	256.34	-2.05551	1.75782e-16		112092057	615.663	1871.22	-1.60377	6.5e-35
						112091217	6.8048	27.9012	-2.05547	0.00816639		21408381	28.0401	85.2389	-1.60368	6.13e-07
						21386299	27.6869	114.352	-2.0554	7.10962e-08		21400454	42.1786	128.174	-1.60286	4.31e-07
						21403313	10.5667	44.2292	-2.05327	0.00040895		21388032	655.02	1987.01	-1.60088	2.28e-40
						21401824	5.91667	24.4777	-2.05162	0.0029811		21397147	57.3278	173.93	-1.60052	3.75e-10
						novel.1129	28.054	115.659	-2.0491	1.22496e-10		21387839	614.998	1864.75	-1.60029	6.01e-10
						21408541	5.01209	20.5767	-2.049	0.0128154		21400334	194.712	590.219	-1.60001	4.37e-30
						21388315	297.56	1230.95	-2.04836	1.96446e-57		21387985	3735.97	11319.1	-1.5992	5.37e-112
						21406689	109.008	448.909	-2.04628	2.37944e-20		21404169	58.6962	177.675	-1.59791	1.61e-13
						21389746	55.7743	228.858	-2.04132	3.78847e-17		21394513	97.0446	293.694	-1.59768	5.61e-18
						21410615	326.518	1342.38	-2.04046	2.2994e-66		21399136	241.692	729.694	-1.59409	8.37e-26
						21384874	269.801	1108.8	-2.03972	1.28755e-24		novel.165	12.9008	38.817	-1.58979	0.000920551
						21402055	57.3152	234.635	-2.03937	2.3477e-10		21394562	119.31	358.589	-1.58767	6.65e-21
						112090395	108.597	445.557	-2.03927	3.17441e-30		21400775	16.1067	48.4201	-1.58723	0.000214857
						21390800	52.542	216.156	-2.03898	2.30365e-14		21392370	195.358	586.872	-1.58674	6.88e-34
						112094545	2.63096	10.7771	-2.03673	0.0457835		21401042	89.9445	270.108	-1.58619	2.46e-18
						21412250	4.40172	17.7869	-2.03663	0.0173232		21408834	92.1683	276.76	-1.58605	1.37e-16
						21394911	96.1474	395.289	-2.03611	5.20484e-15		21386780	335.152	1005.97	-1.58557	1.13e-34
						21384991	2.9516	12.0513	-2.03171	0.0367778		21397720	524.348	1573.32	-1.58518	8.69e-64
						21401934	5.92516	24.1462	-2.03136	0.00174796		21396095	70.335	210.78	-1.58363	2.11e-13
						21399975	60.3166	245.911	-2.03073	2.77544e-16		21404894	35.7685	107.243	-1.58329	3.91e-07
						21391132	59.275	241.305	-2.03	1.23368e-12		21404101	288.17	862.847	-1.58196	1.05e-38
						21391567	435.788	1778.44	-2.02959	5.68636e-23		21409788	31.892	95.5063	-1.58167	4e-07
						21402896	6.62378	26.8274	-2.02703	0.00103626		21399200	154.095	461.148	-1.58118	4.1e-25
						112092892	132.304	538.981	-2.02643	5.484e-37		21404774	28.677	85.8095	-1.58115	1.32e-06
						112090841	8.77953	35.8565	-2.02576	0.000296014		21400693	124.448	372.281	-1.58102	4.86e-23
						21408867	67.1938	272.839	-2.02495	3.03216e-19		21396361	211.931	633.978	-1.58085	2.31e-19
						21403721	3.99731	16.1239	-2.02486	0.0134821		21400344	14.1666	42.3166	-1.57756	0.00149386
						112091568	1598.76	6500.53	-2.02371	7.54623e-44		21386483	16.1127	48.0737	-1.57662	0.00022058
						21390828	505.627	2053.4	-2.02251	1.02902e-30		21406665	23.2005	69.1458	-1.57534	4.68e-05
						21396086	24.2053	98.3298	-2.02175	8.92155e-10		112094505	25.1602	74.9516	-1.57527	4.12e-06
						21403531	1283.19	5205.91	-2.0203	1.7633e-40		21397111	180.511	537.827	-1.5747	3.82e-26
						21388582	397.304	1610.93	-2.01874	2.68215e-57		21402584	76.752	228.641	-1.57462	1.4e-13
						21408768	52.164	210.532	-2.01785	6.66353e-17		21408974	36.7322	109.377	-1.57393	6.3e-07
						21387755	9.57939	38.6154	-2.01641	0.000758075		21406191	48.6952	144.948	-1.57363	3.89e-11
						21388173	13.5373	54.4801	-2.01416	6.42299e-06		21390365	76.7358	228.344	-1.57327	4.29e-15
						21409088	90.7148	366.324	-2.01376	3.91021e-21		21399695	20.9644	62.2901	-1.57169	5.67e-05
						21408004	2084.21	8412.28	-2.01314	3.63741e-40		21391835	73.8798	219.301	-1.56985	1.36e-13
						21393655	34.3117	138.625	-2.01306	3.59684e-14		21402930	28567	84805.6	-1.56981	2.73e-62
						21410210	8.4898	34.2325	-2.00983	0.000442372		21383874	86.4012	256.505	-1.5696	9.27e-18
						21390365	55.8202	224.846	-2.0081	3.08838e-21		21412879	19.9669	59.2441	-1.56868	9.68e-05
						21391108	424.655	1707.56	-2.00732	1.65951e-66		21399586	57.6975	171.095	-1.56808	3.89e-12
						21399864	5.3063	21.1482	-2.00408	0.00519122		112095040	42.2159	125.164	-1.56747	1.99e-09
						21407753	27.3423	109.708	-2.00198	1.58379e-06		21393582	332.663	984.302	-1.56489	6.7e-44
						21411681	134.789	538.779	-2.00152	3.1558e-14		21399537	53.2172	157.397	-1.56481	1.91e-11
						21401272	86.6467	346.496	-2.00117	5.20098e-30		21402114	199.996	591.432	-1.56442	1.65e-25
						21387893	42.9666	171.271	-2.00067	3.55607e-14		21394000	14.1735	41.9315	-1.56422	0.000956011
						21406765	117.46	468.334	-1.99927	1.87832e-16		21403058	36.12	106.725	-1.56307	6.12e-07
						21401011	28.1587	112.481	-1.99801	1.33774e-10		21395205	13.5361	39.9956	-1.56187	0.0014044
						21389959	28.3337	113.311	-1.99656	1.90878e-10		21395814	190.534	561.887	-1.55998	1.31e-29
						21395103	1461.93	5828.6	-1.99541	7.54565e-27		21390291	13.5122	39.8657	-1.55975	0.00284403
						21408660	4.50147	18.0827	-1.99501	0.0181384		21408576	38.7066	114.065	-1.55972	1.4e-07
						21404452	224.14	892.683	-1.99471	6.68504e-42		21412323	22.2175	65.3719	-1.55658	0.000411073
						21396024	41.8331	166.216	-1.9939	1.6947e-13		21398935	96.714	284.084	-1.55463	2.24e-17
						112094809	182.183	725.288	-1.99363	1.10994e-41		21394015	89.3123	262.386	-1.55432	4.74e-12
						21408655	8.8593	35.2154	-1.99291	0.000137171		21397627	285.219	836.675	-1.55285	1.9e-28
						21399591	44.1743	175.173	-1.99198	2.50822e-15		21384383	226.874	665.649	-1.55267	3.92e-29
						21401080	197.125	784.704	-1.9919	3.45097e-38		21405234	72.186	211.692	-1.55189	5.75e-12
						21388107	8.38557	32.9115	-1.98808	0.00109328		21409601	80.3523	235.198	-1.55018	3.71e-12
						21388765	2.63096	10.404	-1.98714	0.0455312		21399157	70.7381	207.062	-1.54967	0.0191143
						21397793	679.924	2694.98	-1.98624	1.08131e-82		21399504	112.901	330.18	-1.54855	5.96e-20
						21397447	5376.25	21292.8	-1.98575	1.74399e-55		21410170	235.721	689.454	-1.54836	5.47e-25
						21402930	21087.8	83504.9	-1.98546	7.35319e-53		21388985	8.06718	23.5266	-1.5446	0.0144654
						21402098	25.6554	101.276	-1.98435	9.04328e-10		21386903	187.031	545.605	-1.54443	1.5e-24
						21391933	11.2709	44.339	-1.98406	9.92589e-05		21400614	12.8769	37.5675	-1.54331	0.00452344
						21407504	34.566	136.534	-1.97926	4.27774e-13		21384111	235.334	685.353	-1.54199	2.03e-35
						21389501	611.061	2408.4	-1.97855	3.6054e-47		21395494	9.34737	27.1973	-1.54143	0.0128143
						21392114	34.4584	134.987	-1.97634	5.43101e-10		21401901	254.748	741.296	-1.54106	1.43e-34
						112091109	94.581	371.297	-1.97577	3.97338e-19		21394080	13.2176	38.44	-1.54072	0.00170012
						21391547	9.15453	35.6557	-1.97405	0.0174722		21406027	1372.56	3992.81	-1.54052	4.01e-56
						21408877	3403.93	13364.4	-1.9732	8.01651e-38		21399216	38.3531	111.569	-1.54004	2.39e-07
						21404394	40.0928	157.139	-1.97319	3.42726e-15		21409818	21.5993	62.8169	-1.53955	3.09e-05
						21404125	172.08	674.045	-1.97133	5.97087e-25		21401531	592.896	1721.64	-1.53788	1.03e-57
						21393333	9.61282	37.9099	-1.97131	0.0109376		21393971	13.5115	39.2683	-1.53751	0.00430876
						21398424	805.307	3156.47	-1.97103	4.36883e-67		21401808	16.4428	47.7178	-1.53706	0.000309704
						112092607	104.701	409.892	-1.96876	1.2402e-29		112090572	113.851	330.107	-1.53583	1.13e-19
						21387501	36.0805	141.677	-1.96875	3.36768e-12		21386234	12.5894	36.4733	-1.5354	0.00205157
						21388273	29.1665	113.538	-1.96777	3.36208e-09		21395529	48.9744	142.026	-1.53523	4.39e-09
						21394524	387.611	1515.86	-1.96758	1.67999e-37		21410346	254.099	736.131	-1.53446	1.02e-37
						21405359	109.319	426.757	-1.96622	2.10317e-27		21386468	8.37865	24.2919	-1.53419	0.0175265
						21388375	8.36213	32.8828	-1.96471	0.00194376		21400514	34.1641	98.8383	-1.53239	1.05e-07
						21398519	15.6626	61.0106	-1.95971	1.2715e-06		21393740	40.6308	117.454	-1.5311	5.22e-07
						21409269	12.4253	48.2871	-1.95779	1.92222e-05		21403643	40.9073	118.257	-1.53099	1e-07
						21385249	170.007	659.623	-1.95694	1.08871e-33		21399358	7.08991	20.5015	-1.53088	0.0353226
						21408150	344.082	1334.85	-1.95513	2.27313e-58		21408615	107.694	311.175	-1.53084	5.47e-18
						21396892	75.7603	293.07	-1.9549	8.80198e-20		21395140	119.987	346.422	-1.53004	2.93e-20
						21384809	43.1067	166.584	-1.95319	1.88217e-13		novel.232	10.6464	30.7525	-1.53	0.00982279
						novel.260	8.85033	34.2354	-1.95266	0.000187241		112094722	515.83	1488.96	-1.52922	2.21e-40
						21399539	44.9188	174.085	-1.95105	7.86383e-14		21393296	217.986	628.727	-1.52819	3.41e-36
						21390655	21.9144	84.1439	-1.9497	3.06289e-07		21399747	328.472	947.202	-1.52788	0.000739497
						21391077	1615.78	6234.92	-1.94773	1.0581e-46		21395083	129.291	372.66	-1.52718	1.71e-17
						21401744	19.0535	73.7651	-1.94754	0.000250132		21407949	1042.49	3004.11	-1.52691	1.68e-57
						21409373	94.98	366.812	-1.94752	1.29987e-25		21391359	162.549	467.819	-1.52534	4.06e-26
						21401568	19.2949	74.2777	-1.94358	1.42368e-07		21406932	14.8515	42.7222	-1.52439	0.00241092
						21404183	153.913	590.499	-1.94279	3.04477e-32		21390875	160.878	462.791	-1.52423	1.3e-24
						21398461	4.49698	17.4187	-1.94207	0.024331		21410017	53.8911	154.789	-1.52261	6.06e-10
						21400048	778.264	2976.12	-1.93593	4.49677e-46		21397157	123.179	353.668	-1.52155	9.02e-21
						21400385	387.936	1482.25	-1.93449	2.73364e-62		21408126	12.5924	36.1183	-1.52117	0.00328143
						21412674	453.847	1732.15	-1.93371	8.72353e-34		21407028	439.245	1260.61	-1.52107	6.05e-08
						21407786	1692.37	6457.5	-1.93223	1.72336e-34		21402947	13.2131	37.9335	-1.52041	0.00252617
						21383687	74.2051	282.702	-1.9291	2.28125e-18		21390008	22.5851	64.733	-1.5197	5.02e-05
						21389229	49.5455	187.944	-1.92807	1.71105e-12		21404400	24.4806	70.0967	-1.51765	5.01e-05
						21403553	5.33722	20.1345	-1.9269	0.0174355		112092542	16.4365	47.0419	-1.51675	0.000585814
						21399515	19.436	73.5243	-1.92392	9.29977e-08		21409429	162.333	464.518	-1.51645	4.76e-16
						21404083	5.18712	19.7757	-1.92391	0.00799924		21401634	516.233	1476.62	-1.51609	7.51e-49
						novel.450	10.849	41.1052	-1.92342	0.000458743		21404730	36.1261	103.084	-1.51339	3e-06
						21395668	8.86378	33.5418	-1.92218	0.000368346		21395241	87.1212	248.593	-1.51328	7.74e-13
						21385740	16.08	60.8139	-1.92057	1.22242e-06		21390635	769.628	2196.79	-1.5131	4.98e-73
						21409362	239.889	907.738	-1.92034	5.52599e-51		novel.1151	7.40898	21.1497	-1.51244	0.0255059
						21392623	63.1072	238.915	-1.91957	2.72341e-19		21400674	8.38795	23.9203	-1.51142	0.0201198
						21391965	269.141	1017.74	-1.91955	1.43369e-28		21388851	57.0642	162.691	-1.51126	4.87e-10
						21408557	9.47415	35.8651	-1.91936	0.000303362		21401026	21.9462	62.5157	-1.51019	0.000295652
						21394709	6.21937	23.5191	-1.91858	0.00364404		21390994	131.866	375.462	-1.50944	1.98e-22
						21396421	946.933	3574.48	-1.91687	3.96167e-22		novel.577	51.2789	145.974	-1.50926	1.68e-10
						21396769	5.26641	19.8032	-1.91493	0.00652049		21409949	374.55	1065.47	-1.50821	2.16e-40
						21389299	40.4428	152.731	-1.91441	3.54937e-14		21411675	25.1786	71.5587	-1.50771	3.56e-05
						21410428	117.395	443.099	-1.91424	3.8102e-27		21401157	150.547	427.992	-1.50736	1.38e-24
						21402516	8.21802	30.9182	-1.91424	0.000601775		21394061	135.75	385.719	-1.50671	4.41e-19
						21390619	20.1381	76.1319	-1.91366	5.60045e-07		112092751	702.185	1993.71	-1.50545	3.32e-50
						21387348	425.997	1603.57	-1.9132	8.48366e-49		21397201	23.544	66.7142	-1.50319	0.000122554
						21400741	52.8691	199.38	-1.91298	1.54846e-16		21412580	155.027	439.371	-1.50273	3.19e-23
						21394022	33.096	124.558	-1.91262	6.56842e-12		21409773	698.563	1979.39	-1.50254	1.5e-59
						21390749	54.1183	203.538	-1.91242	0.0053669		21388582	578.218	1635.95	-1.50053	4.16e-54
						21392023	2434.89	9157.26	-1.91121	2.2943e-26		21399117	15.8006	44.709	-1.50022	0.000562036
						21385969	52.5734	198.347	-1.91079	5.11171e-14		21398981	157.928	446.798	-1.5002	2.25e-24
						21390902	25.1672	94.668	-1.91008	9.59955e-10		21401350	9.03845	25.5364	-1.49935	0.0258486
						21392766	45.1891	169.146	-1.90899	3.33027e-14		21387734	145.689	411.957	-1.4993	3.65e-23
						21406674	31.5057	118.178	-1.90896	9.02918e-12		21404217	9.04077	25.5042	-1.49774	0.0210431
						21388867	60.6483	227.562	-1.90865	1.86201e-20		21410452	71.2477	201.182	-1.49743	1.62e-11
						112090627	10.4531	39.2626	-1.90786	0.000309288		21409349	250.568	707.15	-1.49667	3.27e-26
						21390415	21.1838	79.6255	-1.90733	1.15953e-06		21391307	371.966	1049.19	-1.49603	2.19e-31
						21402163	64.3389	240.976	-1.90719	0.00280167		21394048	8.6937	24.531	-1.49597	0.0333682
						21398764	63.7999	238.99	-1.90503	2.62345e-15		21393223	920.706	2596.72	-1.49578	3.71e-73
						112092776	4.58973	17.1739	-1.90384	0.020362		21387120	14.5118	40.893	-1.49483	0.00152235
						21387404	5.80598	21.8616	-1.90198	0.00752424		21388510	77.6973	219.003	-1.49475	4.43e-13
						21399537	41.7075	154.992	-1.90152	3.94749e-08		21386541	13.5536	38.1806	-1.49469	0.00229126
						112090745	24.2671	90.5663	-1.90127	1.80638e-08		21396408	1001.1	2820.23	-1.49423	2.57e-38
						21407242	6.97086	25.8499	-1.90079	0.002265		21409894	207.325	583.159	-1.49191	1e-23
						112090826	428.418	1598.88	-1.90063	2.06402e-53		112092310	35.1418	98.7809	-1.49121	1.07e-06
						21393012	10.0905	37.3017	-1.89866	0.00493151		21385844	420.932	1182.36	-1.48998	3.57e-07
						21408203	34.1502	126.952	-1.89625	3.38885e-12		21392645	9.35298	26.2502	-1.48897	0.0123098
						21393469	186.054	692.411	-1.8962	2.57441e-33		21402163	87.2028	244.737	-1.48889	0.00835512
						21397375	135.869	505.533	-1.89558	5.18238e-37		21403786	161.446	452.969	-1.48845	0.000551346
						21392873	6.62827	24.4729	-1.89376	0.00310756		21399961	383.303	1075.47	-1.48822	2.85e-43
						21398584	30.456	113.038	-1.89238	1.10247e-10		21392115	30.9529	86.753	-1.48742	4.94e-06
						21408879	11.5975	42.5894	-1.89182	0.00934449		21391800	392.229	1097.78	-1.48495	1.64e-41
						21401022	5.62198	20.7648	-1.89094	0.0275071		21398673	111.877	312.928	-1.48388	9.94e-16
						21387907	31.9979	118.252	-1.88999	4.10101e-09		21403312	16.4289	45.9558	-1.48388	0.000901504
						21388753	393.279	1455.67	-1.88928	5.59484e-47		21384999	169.209	473.132	-1.48353	2.75e-17
						21400859	816.457	3023.79	-1.88906	2.46552e-43		21409929	19.0341	53.1956	-1.48296	0.000242322
						21401288	11.3756	42.2841	-1.88904	9.67275e-05		21393482	10.0003	27.9415	-1.48284	0.00824086
						21399961	286.05	1058.93	-1.88741	1.01472e-37		112093896	8.04564	22.4865	-1.4818	0.0283041
						21384925	52.3884	193.034	-1.88669	1.70557e-09		21397838	183.691	512.985	-1.4813	7.69e-22
						21387981	8.13424	30.1624	-1.88665	0.00102649		21392721	97.6145	272.533	-1.48063	1.83e-10
						21402620	619.908	2291.52	-1.88597	1.92399e-61		21404020	12.5883	35.1023	-1.48004	0.0162931
						21396536	107.711	398.465	-1.88577	2.0675e-23		21386105	252.474	703.804	-1.47921	8.86e-22
						21400726	26.6073	98.5721	-1.8841	2.6475e-08		21388755	8.70089	24.2708	-1.47879	0.0231981
						21408206	1470.63	5428.89	-1.884	8.26613e-79		21395018	182.578	508.775	-1.47875	4.23e-20
						21397483	33.5952	124.17	-1.88353	2.59692e-11		112092419	30.9742	86.1203	-1.47605	1.36e-05
						21400879	99.2146	364.868	-1.88173	1.71016e-18		21395916	1706.47	4743.58	-1.47498	1.45e-79
						21407351	182.79	673.537	-1.87992	3.80409e-19		21396632	730.741	2030.8	-1.47453	3.2e-49
						21407113	154.609	569.807	-1.87991	7.9004e-22		21406380	84.1596	233.502	-1.47227	1.47e-13
						112094266	413.309	1519.44	-1.87854	0.0148866		21396775	15.4668	42.8878	-1.47147	0.00159168
						21403887	54.9086	201.27	-1.87637	1.08372e-15		21397615	885.453	2454.62	-1.47092	6.09e-47
						21401208	53.2685	195.69	-1.87598	1.98918e-17		21384557	93.7879	259.038	-1.46549	2.88e-15
						21389277	9.92695	36.2086	-1.87483	0.000345685		21403745	54.1143	149.511	-1.46539	1.29e-07
						novel.672	13.4789	49.7624	-1.8742	0.000864235		21384909	841.578	2323.94	-1.46539	8.13e-11
						21397292	16.7976	61.0361	-1.87353	0.000289491		21404617	8.38234	23.1377	-1.46534	0.025194
						21397489	64.9803	237.963	-1.87162	0.00501451		21405186	37.0597	102.176	-1.46307	6.32e-06
						21400614	10.0805	36.9899	-1.87161	0.00344379		112094087	157.013	432.803	-1.46265	5.89e-24
						21406575	4.19877	15.4751	-1.87153	0.0250036		21409855	235.733	648.876	-1.46101	2.04e-27
						21406757	5.0076	18.1543	-1.87135	0.0147889		21397292	22.5198	61.9835	-1.45984	0.00100831
						21388157	440.261	1610.01	-1.87134	5.75986e-45		21397461	46.7213	128.498	-1.45922	1.55e-08
						21392437	1397.81	5112.58	-1.87065	4.40717e-52		21410049	406.545	1115.76	-1.45645	5.64e-37
						21401727	26.188	95.2407	-1.87039	7.10566e-08		21386340	52.8652	145.05	-1.45563	2.15e-09
						112093231	17.5436	63.7779	-1.86909	6.4829e-06		21394140	7.72498	21.2002	-1.45447	0.03759
						21392542	53.0645	193.224	-1.86853	1.37164e-14		novel.652	321.731	881.464	-1.45399	7.02e-32
						novel.911	76.9507	280.029	-1.86785	3.26878e-11		21394060	26.7728	73.2883	-1.45309	1.29e-05
						21387916	688.713	2512.93	-1.86775	8.33673e-80		21392275	341.424	933.398	-1.451	9.7e-33
						21388384	52.0154	190.088	-1.86524	8.08881e-15		21403301	34.1475	93.3602	-1.45066	5.76e-06
						21399365	27.7124	101.498	-1.86508	1.58003e-06		21408801	11.5883	31.6437	-1.44884	0.0120164
						21389411	27.4296	100.019	-1.86468	2.20568e-09		112095292	14.784	40.4044	-1.44846	0.0252498
						21408831	13.459	48.9547	-1.86385	0.00651282		21408669	96.0932	262.15	-1.44793	9.81e-16
						21410481	5.91619	21.4818	-1.86289	0.014365		21386736	7.75487	21.1345	-1.44769	0.0398446
						112091874	11.3272	41.4155	-1.86274	0.000664325		21386332	282.305	770.048	-1.4475	2.91e-27
						21398557	26.3939	95.5608	-1.86153	1.42624e-08		21403967	110.557	301.49	-1.447	3.3e-16
						21400558	6.98431	25.1673	-1.8602	0.00421159		21404745	22.2475	60.6154	-1.44639	8.99e-05
						112091254	19.8085	72.1589	-1.85952	6.09421e-07		21406648	28.7018	78.1489	-1.44487	5.09e-05
						21384336	55.1734	199.511	-1.85893	8.09799e-13		21410407	14.5035	39.4557	-1.44426	0.00367549
						21388063	259.38	940.272	-1.85638	5.1396e-27		21397212	10.6217	28.9052	-1.44403	0.0158023
						21407462	290.178	1049.51	-1.85548	1.81274e-24		21403498	353.491	961.739	-1.444	5.03e-36
						21389112	125.949	455.408	-1.85379	2.27471e-22		21392588	602.259	1638	-1.44343	9.48e-34
						112094471	11.3063	40.566	-1.85363	0.000350759		21406388	354.374	962.321	-1.4412	3.35e-35
						21391801	104.016	375.935	-1.85298	1.52919e-25		21409975	7711.04	20936.1	-1.44099	2.29e-41
						21393722	97.9833	353.978	-1.85216	6.80477e-16		21412872	45.4308	123.297	-1.44024	1.84e-07
						112093090	232.296	837.464	-1.85184	2.32093e-25		21398116	14.1806	38.4765	-1.44015	0.00310165
						novel.157	3.65023	13.0794	-1.85151	0.0359606		21394508	222.74	603.193	-1.43708	1.11e-25
						21385846	15.338	55.2994	-1.8485	5.22531e-05		21412092	157.572	426.19	-1.43534	5.45e-18
						21394505	77.0918	276.604	-1.84801	1.72146e-15		21397164	598.765	1617.26	-1.43354	7.65e-43
						21407698	12.1759	43.7392	-1.84744	0.000304936		21385927	649.414	1754.35	-1.43353	4.64e-34
						21397339	2541.18	9141.72	-1.84702	4.11006e-48		112092261	78.9084	213.025	-1.4323	1.12e-09
						21389081	6.10467	22.1516	-1.84641	0.00774114		novel.831	7.08135	19.1147	-1.43107	0.0458644
						112091983	262.477	942.781	-1.84576	1.24796e-23		112090527	31.9082	86.0004	-1.4298	5.35e-06
						21402557	4413.82	15856	-1.84502	6.13761e-71		21405757	318.539	857.852	-1.42941	2.42e-31
						21405367	95.0093	341.369	-1.84403	1.98457e-16		21397039	13.5574	36.4653	-1.42822	0.00441768
						21403059	54.7251	195.845	-1.8432	3.94961e-14		21398799	31.8882	85.8196	-1.42799	1.92e-05
						21384581	6.78984	24.4876	-1.84258	0.00653979		112092908	9.00686	24.2381	-1.42643	0.0334204
						21397720	431.676	1549.15	-1.84214	3.03031e-44		21389127	101.273	272.038	-1.42571	9.57e-16
						21409110	203.022	727.56	-1.84212	1.09876e-34		21403625	148.301	397.985	-1.42401	1.66e-20
						21408788	1034.35	3706.79	-1.84172	2.58963e-76		21388157	609.625	1635.09	-1.42346	7.02e-40
						21408896	9.69008	34.4615	-1.84164	0.00468572		21400048	1127.59	3022.5	-1.42241	7.23e-37
						21385481	10.7343	38.5699	-1.84126	0.000555447		21410455	58.3828	156.457	-1.4224	9.63e-10
						21393200	162.571	580.698	-1.83621	2.61859e-30		21383988	19.3517	51.8086	-1.42097	0.000346132
						novel.440	14.2668	50.6292	-1.8358	0.00010624		112093672	131.61	352.375	-1.42075	1.24e-09
						21385349	59.068	210.692	-1.83578	1.35753e-15		112092680	55.8046	149.388	-1.42069	1.74e-08
						21390350	656.197	2332.81	-1.83017	2.409e-74		21406844	35.7759	95.7383	-1.42004	2.01e-06
						21400731	487.177	1731.74	-1.82884	3.34915e-48		21400642	268.711	717.761	-1.4172	4.77e-19
						21409614	2336.42	8295.04	-1.82767	5.1127e-32		21394804	16.4414	43.8887	-1.41696	0.00393091
						21394937	40.8059	145.449	-1.82754	3.45184e-10		21408302	135.083	360.504	-1.4158	2.32e-15
						21402511	204.224	723.384	-1.82604	1.77389e-26		21406870	93.539	249.49	-1.41558	4.94e-14
						21399396	13.9991	49.2613	-1.826	0.000227493		21399569	1448.69	3863.13	-1.41495	3.39e-59
						21391076	4368.21	15476.4	-1.82488	2.77124e-67		21394069	8.05029	21.4699	-1.41448	0.0344129
						21401488	8.30628	29.2186	-1.82457	0.00206664		21408680	18.7099	49.8265	-1.41304	0.00166849
						112091873	3.6238	12.7881	-1.82273	0.0492794		21386870	26.7486	71.1989	-1.4123	0.000146275
						21395136	37.186	131.271	-1.82254	1.54857e-09		21407506	144.741	385.155	-1.41188	4.74e-20
						21392466	23.8293	83.8628	-1.8222	3.62086e-07		21385495	196.388	522.339	-1.41153	1.08e-18
						21408394	30.9806	108.965	-1.82153	3.50228e-06		21388378	94.472	251.099	-1.41044	1.69e-13
						21406870	69.4492	245.673	-1.82023	2.02728e-18		21402586	505.24	1343.04	-1.41038	1.8e-39
						21402053	18.9448	66.4462	-1.81928	1.51577e-05		112091417	66.7184	177.249	-1.40942	1.65e-10
						21403643	32.9728	116.452	-1.81865	2.3906e-09		21406344	22.2394	59.0936	-1.40912	0.000768078
						21395061	60.0374	211.527	-1.81816	9.76746e-17		21391094	50.647	134.416	-1.4082	3.3e-08
						21408801	8.85033	31.1663	-1.81749	0.00162462		21404625	21.6047	57.3587	-1.40818	0.000253573
						112092997	5.48133	19.447	-1.81693	0.0159982		21385893	19.6679	52.157	-1.40699	0.000642241
						21392480	9.69409	33.9272	-1.81549	0.0184306		21405040	116.693	309.343	-1.40651	1.65e-13
						21409097	4.99863	17.4327	-1.81469	0.0211971		21388197	53.8147	142.55	-1.40497	8.93e-08
						21385682	4803.97	16855	-1.81095	3.76262e-31		21398358	474.559	1256.56	-1.40486	3.36e-44
						21403967	84.492	296.872	-1.81084	4.74979e-20		112092602	308.877	817.246	-1.40377	1.85e-35
						21398899	161.506	566.48	-1.80906	1.27277e-24		21395152	14.1873	37.5081	-1.40251	0.00273751
						21401456	9.52701	33.3369	-1.80835	0.00154439		112094350	50.5763	133.699	-1.40181	1.3e-07
						21387773	465.365	1627.67	-1.80739	2.53134e-45		21399963	161.865	427.621	-1.40145	3.59e-23
						21410553	113.37	396.36	-1.80601	3.40278e-17		21411065	83.5511	220.514	-1.40076	3.74e-10
						21401837	233.361	815.149	-1.80507	1.4043e-45		21387387	31.8726	84.2024	-1.40076	7.06e-05
						21397383	964.741	3369.23	-1.80371	5.30675e-52		21399799	47.69	125.855	-1.40021	4.54e-06
						novel.847	7.78866	26.8324	-1.80107	0.0189215		21400139	71.2023	187.911	-1.39954	1.12e-09
						21402210	41.7872	145.798	-1.80093	4.73128e-11		21389768	626.485	1651.39	-1.3984	1.19e-27
						21395880	305.951	1066.17	-1.80086	2.48618e-40		21410908	10.3348	27.202	-1.39792	0.0227784
						21393545	4.22071	14.7667	-1.80074	0.0286489		21391819	61.9267	163.002	-1.39632	1.8e-07
						21402068	43.1955	150.608	-1.79769	3.49412e-10		21409375	102.493	269.675	-1.39544	1.33e-14
						21409299	69.922	242.822	-1.79511	3.32037e-13		21412552	20.6137	54.2432	-1.395	0.00090746
						21397801	9.48312	32.899	-1.79379	0.00257382		21400802	714.288	1878.61	-1.39497	7.9e-28
						21407479	30.1982	103.98	-1.79144	1.39302e-07		novel.477	24.509	64.3387	-1.39292	0.000162024
						21394260	4.28255	14.7646	-1.7902	0.0298693		21395926	73.5043	192.948	-1.39221	6.4e-12
						21389919	4909.69	16965.3	-1.78893	5.87756e-32		21394973	101.499	266.355	-1.39146	2.82e-12
						21401576	79.454	273.702	-1.78847	6.84004e-12		21394500	864.535	2267.83	-1.39123	1.07e-44
						21399772	7.37528	25.2348	-1.78816	0.0103068		21386255	99.3377	260.299	-1.39006	7.7e-14
						21397190	18.5409	63.6952	-1.78748	2.10795e-05		21385580	141.19	369.638	-1.38824	1.17e-19
						21395753	132.574	458.044	-1.78671	8.57377e-19		21386985	82.5477	216.052	-1.38818	2.63e-10
						21401901	211.745	729.957	-1.78633	0.000476981		21408727	403.413	1055.58	-1.38764	1.16e-41
						21400643	71.0665	244.702	-1.78605	3.27625e-13		21394936	69.9409	182.994	-1.38747	5.72e-10
						21393124	13.3358	45.628	-1.78567	0.000364708		21398494	373.277	976.614	-1.38747	6.08e-24
						21400710	11147.5	38426.6	-1.78542	4.63313e-41		21384722	58.6312	153.379	-1.38695	8.36e-08
						21408231	62.7415	216.265	-1.78511	0.00760448		21392515	21.943	57.2998	-1.38508	0.000291243
						21405964	19.7726	68.4413	-1.78509	4.01798e-06		21406384	49.6578	129.567	-1.38358	7.7e-07
						21405363	12.5006	42.9813	-1.78507	9.91331e-05		112091998	69.3132	180.878	-1.38339	3.96e-10
						21397013	111.064	381.541	-1.78449	2.50823e-14		21409946	111.221	289.99	-1.38226	6.76e-15
						21391997	19.7611	67.8343	-1.78326	2.13168e-06		21384653	42.2524	110.039	-1.38129	9.31e-07
						21397597	135.527	465.699	-1.78179	7.18029e-23		21408254	34.1562	88.9402	-1.38044	1.89e-05
						21405882	49.927	171.148	-1.77957	4.59714e-14		21400195	70.9833	184.732	-1.37979	4.36e-09
						112094834	102.895	353.342	-1.77854	1.19751e-22		21390422	11.9296	31.051	-1.37972	0.00821305
						21399776	20.0653	68.1455	-1.77421	0.000114993		21391131	41.2622	107.379	-1.37971	9.52e-06
						112090527	24.7099	84.6766	-1.77198	1.67684e-07		112094421	18.0686	46.9578	-1.37858	0.00895008
						21410455	45.2499	154.06	-1.76842	9.36196e-12		21410432	22.5758	58.689	-1.37813	0.00025907
						21396397	139.743	475.069	-1.76841	3.82462e-18		21389112	177.965	462.54	-1.37763	3.83e-19
						21408680	14.4065	49.0605	-1.76756	4.07963e-05		21401025	6859.72	17811.5	-1.3766	1.21e-92
						21384924	126.064	429.167	-1.76753	2.35122e-23		112092892	210.94	547.372	-1.37573	3.56e-24
						novel.1	10.0441	34.2981	-1.76718	0.0158635		21410420	26.8	69.5076	-1.37566	0.00132723
						21397722	169.747	576.821	-1.76584	2.90278e-25		21392300	74.408	192.901	-1.37432	1.62e-07
						21390416	28.9605	97.9133	-1.76557	3.37753e-06		21407528	140.272	363.329	-1.37313	2.6e-16
						21405495	38.4332	130.469	-1.76552	3.28682e-10		21404846	37.706	97.6377	-1.37295	9.56e-06
						21396729	123.122	418.944	-1.76539	1.94153e-19		21408493	53.8338	139.402	-1.37259	1.2e-07
						21384723	2568.75	8731.49	-1.7653	3.42645e-27		21405359	167.389	433.39	-1.37252	3.27e-20
						21407324	248.217	842.629	-1.76466	8.7341e-25		21398930	185.396	478.917	-1.36898	4.4e-23
						21388142	12.0034	40.9375	-1.76364	0.000220156		21387893	67.3994	173.938	-1.3677	1.86e-10
						21386964	5.80149	19.7963	-1.76102	0.0214029		21409247	28.3962	73.2294	-1.36747	5.82e-05
						21399651	15392.9	52109.8	-1.75925	7.373e-64		21389116	44.1409	113.828	-1.36633	1.2e-06
						21390645	7.97219	26.8044	-1.75883	0.00737118		21397057	101.864	262.609	-1.36599	3.3e-14
						21398040	67.104	227.143	-1.7588	1.96152e-15		21410345	211.854	545.717	-1.36514	4.98e-27
						21398997	383.919	1299.31	-1.75878	5.34987e-31		21405548	10.9815	28.2427	-1.36433	0.02254
						21404972	56.6116	191.578	-1.75815	8.3186e-14		21394230	33.5109	86.1631	-1.36235	8.77e-05
						21391367	165.467	558.743	-1.75794	2.20264e-21		21405427	12.887	33.0608	-1.35875	0.00860314
						21389823	597.385	2017.68	-1.75628	1.27961e-65		21386755	14.508	37.2	-1.35797	0.00407393
						112093321	969.266	3272.04	-1.75568	3.63728e-45		21401995	157.547	403.834	-1.35777	3.72e-12
						21409302	10.862	36.5805	-1.7555	0.000761855		21396563	51.8887	132.939	-1.35702	3.23e-08
						21387983	395.457	1332.76	-1.75393	7.64525e-49		21399104	8.38784	21.4619	-1.356	0.0346476
						21409929	15.6596	52.3828	-1.75217	0.00018911		21407526	601.926	1539.43	-1.35461	5.94e-42
						21405392	5.88126	19.7995	-1.74989	0.0131872		21406235	63.7928	163.21	-1.3546	8e-07
						21390154	47.2681	158.056	-1.74831	6.492e-08		21394415	1120.77	2865.6	-1.35434	1.59e-56
						21391827	25.4839	85.3952	-1.74766	0.00131235		21396202	30.306	77.4605	-1.35354	0.000208497
						21390282	350.884	1177.56	-1.7476	1.16239e-23		21399814	19.33	49.3915	-1.35318	0.00156262
						21384562	33.3673	112.045	-1.74723	1.67864e-09		21396868	128.696	328.717	-1.35296	3.98e-14
						21403380	11.2444	37.5428	-1.74637	0.000816893		21387397	383.721	979.975	-1.35261	1.79e-27
						21397745	38.5304	128.879	-1.7454	1.50926e-09		21385738	128.278	327.627	-1.35232	3.04e-14
						21391562	380.127	1274.53	-1.74478	1.3084e-31		21387436	37.3913	95.489	-1.35232	4.58e-06
						21409403	8.22699	27.4886	-1.7444	0.00306323		21387907	47.0794	120.094	-1.35078	4.07e-07
						21387851	8.24941	27.5606	-1.74389	0.015876		21388563	488.486	1244.24	-1.34892	9.2e-40
						21388279	13.9666	46.938	-1.7438	0.000128035		21397739	177.378	451.622	-1.34823	2.91e-21
						21393238	3814.89	12773	-1.7435	2.38784e-32		21405902	16.0736	40.8784	-1.34555	0.023059
						112091546	6.23683	20.8651	-1.74321	0.0196413		21406975	554.31	1408.5	-1.3452	9.75e-29
						21409870	26.6208	89.0071	-1.74302	2.88529e-05		21399497	415.793	1056.35	-1.34519	3.23e-27
						112091782	405.648	1358.31	-1.74294	1.76333e-52		21399075	192.714	489.674	-1.34505	3.8e-20
						21386408	13.9886	46.9529	-1.74294	0.00011873		21402017	49.4139	125.392	-1.34367	0.0441504
						21401195	158.519	530.301	-1.74289	5.38345e-22		21391855	378.17	958.414	-1.3416	9.9e-38
						21407531	338.009	1128.84	-1.74113	7.55191e-40		21395052	26.7558	67.7673	-1.34094	0.000164491
						21394140	6.25877	20.8704	-1.74039	0.0287447		21404125	270.327	684.551	-1.34064	2.94e-26
						21390484	48.2081	160.969	-1.74036	1.87677e-08		21408320	919.958	2329.05	-1.34005	4.19e-42
						21408743	5.38111	17.7631	-1.74028	0.0302163		21401340	98.6652	249.597	-1.33892	6.89e-11
						21393823	35.4761	118.316	-1.73999	1.59702e-08		21408592	23.2217	58.6319	-1.33639	0.000339556
						21395769	5.51177	18.4978	-1.73998	0.0248278		21391077	2508.65	6331.88	-1.3357	2.39e-44
						21405154	176.202	587.813	-1.73982	5.54821e-29		21395295	554.808	1399.57	-1.33495	9.43e-37
						21396316	124.589	415.819	-1.73945	3.76445e-20		21411668	53.4903	134.937	-1.3347	1.4e-07
						novel.165	11.4459	38.2267	-1.73932	0.000481147		21386998	29.9841	75.5675	-1.33396	0.000131933
						21406393	108.646	362.27	-1.73876	3.39303e-19		21397745	51.9487	130.884	-1.33358	1.4e-07
						21384489	9.93992	33.0283	-1.73799	0.00600578		21405632	14.4849	36.4849	-1.33177	0.0134269
						21392371	9.15351	30.5376	-1.73718	0.001497		21397472	211.397	532.107	-1.33174	0.000465371
						21394579	20.7659	69.4836	-1.73713	1.46469e-05		21388498	73.5422	185.041	-1.3315	1.1e-09
						21396361	187.006	624.214	-1.73659	4.72105e-23		21395234	252.509	635.133	-1.33092	2.04e-27
						21395714	22.1233	73.8761	-1.73516	1.10433e-06		21392788	110.228	277.309	-1.33062	1.12e-13
						21402722	19.6958	65.4191	-1.73326	9.14439e-05		21412153	115.359	290.149	-1.33061	5.67e-12
						21403848	934.761	3106.37	-1.73248	8.35747e-60		21409274	325.326	817.796	-1.32994	3.16e-33
						21390635	650.909	2163.04	-1.73196	1.41733e-63		21385997	54.1079	135.915	-1.32788	4.19e-06
						21396756	36.1423	120.213	-1.73056	8.35983e-09		21393636	25.133	63.1142	-1.32778	0.000636129
						21403684	613.965	2037.65	-1.73042	7.8249e-35		21402733	50.9431	127.788	-1.32689	1.6e-07
						21388335	25.9805	86.059	-1.73037	2.72487e-07		21390416	39.7027	99.4291	-1.32531	2.2e-05
						21392709	14.6653	48.7167	-1.7292	0.000494642		112094832	71.8693	179.884	-1.32354	5.04e-08
						21386625	154.845	513.718	-1.72903	2.50369e-28		21411053	143.889	359.564	-1.32155	2.06e-12
						21398930	142.194	471.556	-1.72784	1.93408e-22		21389309	21.2881	53.2031	-1.32152	0.00102756
						21403831	135.009	446.25	-1.72634	4.61476e-24		21409284	132.081	330.113	-1.32151	9.44e-10
						21388463	4.27357	14.1096	-1.72583	0.0423932		21389262	38.3503	95.8584	-1.32113	7.17e-06
						21396592	5927.55	19598.5	-1.72527	1.97188e-38		21393409	62.5863	156.307	-1.32043	6.19e-08
						21407042	63.1321	207.872	-1.72385	2.77586e-11		21402516	12.5756	31.4007	-1.31975	0.0110249
						21386703	45.4748	149.638	-1.72209	2.31919e-10		21395753	186.41	465.206	-1.31921	9.16e-18
[truncated: 1,205 more rows]

## Sheet: Table S3
Table S3 Complete list of upregulated DEGs identified in the three comparison groups
gene_id	FS1	FS0	log2FoldChange	padj		gene_id	FS3	FS0	log2FoldChange	padj		gene_id	FS7	FS0	log2FoldChange	padj
21384740	149.179	48.155	1.62948	6.05e-05		21384740	232.094	49.923	2.215	2.99029e-09		21384740	118.48	50.6888	1.22383	0.000222615
21385909	64.6425	30.392	1.08653	0.00927546		21385909	444.473	31.4958	3.81802	3.88094e-42		21385909	93.792	31.9817	1.55113	1.54e-06
21386096	39.6284	10.6413	1.8932	0.00122619		21386096	31.5246	11.0355	1.51184	0.0195947		21386096	31.243	11.2028	1.47749	0.0118679
21386813	22.7674	3.56028	2.68018	0.00118532		21386813	17.8058	3.69209	2.27259	0.00871932		21386813	15.5012	3.74885	2.04724	0.0241008
21387573	396.317	117.583	1.7528	5.54e-27		21387573	472.89	121.825	1.95676	9.22423e-26		21387573	267.015	123.723	1.10966	3.3e-10
21387742	34.5786	14.5632	1.24827	0.0199544		21387742	33.5084	15.0917	1.14903	0.0226264		21387742	33.1959	15.3254	1.11462	0.0262429
21388001	372.527	127.187	1.54906	7.81e-16		21388001	311.857	131.79	1.24202	2.76799e-12		21388001	313.244	133.833	1.22624	1.01e-11
21389895	18.6794	4.86357	1.94255	0.0183409		21389895	24.0367	5.0341	2.25693	0.00385236		21389895	42.2666	5.11362	3.04692	1.41e-07
21390177	560.201	252.933	1.14614	3.4e-12		21390177	666.847	262.104	1.34744	5.50379e-18		21390177	930.65	266.175	1.80567	2.49e-46
21390397	49.1532	7.77334	2.66143	9.94e-07		21390397	146.469	8.06262	4.18475	1.08182e-25		21390397	72.9115	8.18663	3.15523	4.89e-12
21390697	11.1302	1.29986	3.10301	0.0193782		21390697	92.8038	1.34368	6.11048	4.66288e-14		21390697	8.69846	1.36537	2.67281	0.0389755
21390724	73.3157	33.3533	1.13868	0.00949884		21390724	133.123	34.5712	1.94292	4.29089e-08		21390724	145.23	35.1065	2.04826	5.66e-11
21390725	123.95	37.9388	1.71118	0.000151877		21390725	172.567	39.3045	2.13327	1.5196e-14		21390725	194.917	39.9195	2.28805	7.85e-17
21390883	172.964	72.5753	1.25577	0.000116982		21390883	267.886	75.2075	1.83345	5.03835e-17		21390883	243.452	76.3773	1.67253	2.67e-18
21391524	1202.09	599.848	1.0033	2.71e-19		21391524	1451.94	621.566	1.22405	2.56741e-33		21391524	2405.46	631.23	1.93001	5.6e-107
21392521	4497.41	1416.04	1.66713	1.44e-42		21392521	36347.7	1467	4.63093	1.76679e-46		21392521	14392.1	1489.91	3.27202	3.12e-254
21392556	1522.85	309.861	2.297	1.36e-84		21392556	1204.17	321.027	1.90761	2.43792e-57		21392556	768.433	326.04	1.23709	2.24e-22
21392822	52.7094	10.0137	2.39252	1.7e-06		21392822	28.7242	10.3768	1.46807	0.0130485		21392822	38.3666	10.5365	1.86227	0.000219995
21393985	521.068	112.354	2.21494	2.8e-18		21393985	1412.97	116.393	3.60217	1.05303e-72		21393985	1096.75	118.224	3.21507	4.84e-101
21394559	37.1793	15.8465	1.23158	0.0196118		21394559	39.3552	16.4235	1.25931	0.00700266		21394559	43.181	16.6768	1.37168	0.00230943
21394746	73.8258	9.41305	2.97527	4.6e-11		21394746	28.0086	9.74897	1.52527	0.00732427		21394746	25.1481	9.90255	1.3457	0.0228132
21399123	14.9792	2.6226	2.525	0.0399217		21399123	649.269	2.71618	7.9071	1.49278e-12		21399123	71.6234	2.76048	4.70465	1.15e-05
21399177	51.6914	4.86471	3.41485	1.21e-06		21399177	534.191	5.04154	6.72912	1.03269e-59		21399177	287.68	5.12017	5.81374	6.41e-43
21399781	2410.3	1152.21	1.06492	0.0034375		21399781	2669.75	1193.99	1.16102	2.03912e-18		21399781	2912.12	1212.57	1.26402	1.18e-33
21400231	389.005	23.101	4.07465	7.99e-12		21400231	101.38	23.9103	2.08432	1.95311e-06		21400231	64.79	24.2928	1.41699	0.00154175
21400605	72.2978	10.3931	2.80272	8.64e-06		21400605	151.529	10.7602	3.81638	1.24402e-23		21400605	117.018	10.9307	3.42215	2.22e-18
21401165	112.241	53.4214	1.07002	0.000140776		21401165	111.819	55.349	1.01364	0.000133032		21401165	129.842	56.2095	1.20771	7.73e-06
21401457	142.686	59.2833	1.26766	5.22e-07		21401457	171.716	61.4175	1.4844	1.1706e-09		21401457	383.06	62.3751	2.61838	9.3e-48
21401681	22.52	7.15891	1.66199	0.0463693		21401681	70.874	7.41747	3.25673	1.03289e-07		21401681	26.7797	7.53485	1.83256	0.00365329
21401717	38.1062	17.4833	1.12379	0.0256947		21401717	87.8196	18.1152	2.27557	1.26198e-10		21401717	69.0121	18.3966	1.90685	1.75e-07
21402491	4596.96	1775.45	1.37274	2.06e-29		21402491	8249.22	1839.62	2.16492	2.58407e-39		21402491	8716.14	1868.31	2.22199	1.18e-95
21403711	26.2685	1.62825	4.02117	0.000909929		21403711	282.919	1.68392	7.39716	3.41295e-25		21403711	57.343	1.71118	5.07161	8.27e-11
21404511	30.7302	10.3748	1.56613	0.0144195		21404511	63.1715	10.7372	2.5575	6.52033e-08		21404511	64.4819	10.907	2.5635	5.48e-09
21405294	67.1363	11.3302	2.56623	9.14e-07		21405294	263.696	11.7564	4.48767	2.05695e-09		21405294	62.566	11.9361	2.39027	6.37e-07
21406066	39.9938	4.86013	3.04438	2.14e-05		21406066	378.114	5.03577	6.2314	2.86379e-46		21406066	110.958	5.11422	4.43941	3.01e-21
21407225	30.3146	4.22509	2.84564	3.45e-05		21407225	23.0698	4.37667	2.39562	0.00292349		21407225	14.1765	4.4458	1.67551	0.0485414
21407939	5859.87	1045.5	2.48664	6.87e-51		21407939	10131.9	1083.19	3.22565	5.22105e-134		21407939	17150.3	1100.11	3.96261	0
21408617	350.158	70.6147	2.31054	5.25e-34		21408617	191.149	73.1813	1.38663	7.48442e-07		21408617	193.533	74.3177	1.38071	1.03e-09
21408847	158.318	59.6037	1.41174	1.75e-06		21408847	128.86	61.7776	1.06107	4.74705e-05		21408847	129.98	62.7358	1.05092	2.43e-05
21408935	179.874	9.11042	4.30638	3.65e-29		21408935	113.074	9.43216	3.58549	1.75942e-16		21408935	58.0914	9.58261	2.60265	1.06e-07
21409798	48.1244	20.3696	1.24258	0.00930519		21409798	129.547	21.1112	2.61571	8.24233e-16		21409798	93.5766	21.4366	2.12454	8.82e-10
21410096	186.444	80.9723	1.20425	7.78e-08		21410096	378.876	83.9028	2.17515	5.02112e-36		21410096	224.706	85.2074	1.3989	1.54e-13
21410227	158.515	49.8211	1.66815	5.48e-10		21410227	181.026	51.6125	1.8091	7.45771e-13		21410227	120.854	52.4136	1.20456	2.78e-05
21411026	45.4081	21.0968	1.10819	0.0236677		21411026	57.5002	21.8653	1.39796	0.00133491		21411026	60.2789	22.207	1.44209	0.000192641
21411354	20.345	0.64363	4.97161	0.00140773		21411354	15.7333	0.666911	4.55613	0.00901793		21411354	13.8873	0.677041	4.35129	0.00755535
112091699	93.9054	15.307	2.61924	1.05e-09		112091699	109.98	15.8577	2.79472	1.47518e-08		112091699	55.3781	16.1098	1.78412	0.00106471
112091758	17.1815	4.54089	1.9233	0.0326893		112091758	18.0612	4.70706	1.94024	0.00934449		112091758	33.2084	4.78031	2.79789	5.48e-06
112092808	56.0564	4.55406	3.62861	1.41e-06		112092808	14.7889	4.72063	1.64928	0.0498945		112092808	31.6142	4.79488	2.725	2.18e-05
112094121	78.7177	7.4421	3.4016	5.97e-12		112094121	31.589	7.7038	2.03565	0.00137074		112094121	20.9825	7.82446	1.42152	0.0469171
112094933	22.2686	8.10461	1.45646	0.0384756		112094933	24.2047	8.39748	1.53125	0.0297053		112094933	34.1815	8.52856	2.00332	0.000359733
novel.1014	16.4909	3.57745	2.20497	0.0160501		novel.1014	26.6243	3.70771	2.84983	9.70344e-05		novel.1014	14.192	3.76609	1.9171	0.0280959
novel.1021	12.0939	2.59169	2.21826	0.0471337		novel.1021	25.4484	2.68327	3.24566	2.49117e-05		novel.1021	16.1215	2.7254	2.56385	0.0046577
novel.198	35.8678	14.24	1.33638	0.0225308		novel.198	39.975	14.7609	1.43679	0.00508299		novel.198	56.6796	14.9888	1.91876	2.11e-05
novel.650	18.4674	2.25528	3.02748	0.00172391		novel.650	10.5194	2.33893	2.16426	0.0415805		novel.650	24.514	2.37425	3.36287	5e-05
novel.834	11.6109	1.61566	2.84205	0.019231		novel.834	9.32555	1.67407	2.47074	0.0375877		novel.834	14.5133	1.69989	3.09104	0.00216362
novel.840	13.2307	1.96123	2.7624	0.0148608		novel.840	258.344	2.02993	7.00194	5.62704e-28		novel.840	329.724	2.06293	7.3322	4.91e-31
novel.99	86.2791	25.6337	1.75237	1.66e-06		novel.99	140.249	26.5463	2.403	1.56997e-15		novel.99	56.0972	26.9644	1.05762	0.00564316
21386703	288.913	144.405	1.0021	4.7e-06		21392030	863.72	431.61	1.00069	4.12677e-09		21409827	805.112	402.417	1.00041	1.7e-15
21399515	142.189	70.962	1.00293	8.56e-05		21398281	171.394	85.7615	1.00086	0.000287158		112092659	1586.15	792.838	1.00054	4.82e-26
21387914	132.496	66.1596	1.00302	0.000129556		21407303	649.017	324.413	1.00104	1.38565e-10		21390608	2221.41	1110.16	1.00088	1.19e-24
21408356	13509.5	6736.54	1.00384	1.27e-23		21389711	322.365	161.108	1.00115	1.10398e-05		21393538	901.074	450.082	1.00157	3.65e-21
112090540	201.959	100.714	1.0039	1.38e-05		21404132	2456.26	1227.02	1.00145	5.24828e-19		21409533	298.907	149.244	1.00176	4.52e-10
21406468	222.738	111.17	1.00444	5.89e-06		21410606	196.908	98.4336	1.00198	1.98566e-05		21405688	3721.78	1857.61	1.00257	5.01e-42
21387058	437.509	217.982	1.00526	1.16e-08		21388560	937.945	467.988	1.00321	3.37329e-19		21409148	34.1964	17.0678	1.00315	0.0446887
21396592	38004.4	18913.3	1.00674	1.21e-17		21389865	262.889	131.139	1.00332	3.34055e-07		21388050	12266.2	6111.75	1.00503	7.16e-40
21397390	312.439	155.47	1.00773	6.25e-09		21396164	1112.92	555.244	1.00336	1.10399e-15		21391672	738.921	368.025	1.00587	7.1e-19
21387607	1926.72	957.085	1.00933	1.26e-19		21390623	2619.94	1306.65	1.00369	7.16443e-09		21398941	506.605	252.133	1.00702	3.26e-14
21385838	50.9504	25.2916	1.00944	0.0252711		21385729	84.8819	42.3313	1.00386	0.00247689		21385648	238.999	118.779	1.00923	1.05e-07
21408805	577.968	287.278	1.00972	3.52e-09		21410551	221.64	110.51	1.00436	2.51802e-07		21394445	41.9136	20.8333	1.00959	0.0257348
21386071	102.425	50.8961	1.01114	0.00156034		21396411	610.086	303.685	1.00573	4.03066e-08		21400080	524.687	260.584	1.00984	3.43e-10
21397039	69.7049	34.652	1.01137	0.0318372		21408379	171.849	85.6226	1.00585	5.68586e-06		112091219	695.909	345.415	1.01044	1.28e-09
21392906	87.538	43.4523	1.01195	0.0021734		21385847	361.974	180.295	1.00596	8.94948e-11		21391296	415.647	206.221	1.01109	2.14e-12
21391066	741.393	367.436	1.01381	1.54e-09		21406971	976.329	486.181	1.00633	1.80445e-10		21390781	88.0774	43.7159	1.01139	0.00135401
112090339	55.0516	27.2053	1.01384	0.03106		21402345	538.414	267.722	1.00818	3.44807e-13		21406652	90.6533	44.9329	1.01161	0.000804533
21397133	194.135	96.265	1.01388	0.000829519		21409943	31.756	15.7919	1.00843	0.0432475		21395946	678.149	336.287	1.01164	5.78e-18
21392766	329.736	163.244	1.01529	4.63e-09		21400149	171.694	85.3512	1.0086	2.44103e-05		21397646	234.303	116.09	1.01264	7.45e-07
21403123	870.536	430.344	1.01601	7.54e-15		21392959	167.686	83.274	1.00936	2.22316e-05		21401185	885.284	438.71	1.01279	7.82e-22
21398336	66.1312	32.7257	1.01611	0.00980104		21384555	375.962	186.881	1.0097	1.84651e-07		21400829	241.483	119.623	1.0133	4.76e-08
21389205	185.907	91.7773	1.01875	4.13e-06		21385517	4207.25	2089.2	1.01004	1.76294e-11		21387556	168.655	83.5467	1.01355	1.57e-06
21404504	86.3579	42.5581	1.01917	0.023037		21396857	459.772	228.388	1.01008	4.98066e-08		21394968	1444.64	715.352	1.01405	2.68e-23
21397824	1691.45	834.408	1.01921	4.16e-23		21384856	1744.8	866.14	1.01034	1.80805e-19		21410424	35.1594	17.3738	1.01644	0.0378989
novel.330	245.951	120.985	1.02303	5.04e-07		112090419	1118.53	555.122	1.01115	1.6859e-14		21404876	3506	1733.19	1.01648	9.68e-39
21397207	475.789	233.888	1.02347	1.59e-09		21393591	449.342	222.749	1.01188	1.39994e-11		21387150	93.8349	46.391	1.01659	0.000531424
21406333	385.241	189.514	1.02348	1.42e-10		21390301	7126.42	3534.14	1.0119	8.37675e-27		21397709	59.3253	29.3128	1.01703	0.00482403
112094732	76.403	37.6402	1.02405	0.006253		21404783	336.698	166.878	1.01194	1.50937e-05		21390947	58.7035	29.0098	1.01743	0.00761529
21395777	301.26	148.225	1.02488	3.02e-05		21400516	38.6047	19.0952	1.01197	0.0356393		21392414	48.3377	23.8653	1.01849	0.0125663
21392542	379.13	186.451	1.02527	8.81e-05		21388103	151.825	75.2259	1.01221	1.89991e-05		21392028	1636.63	807.908	1.01854	3.27e-23
21392335	61.9128	30.3845	1.02758	0.0124589		21393921	55.5105	27.4873	1.01227	0.0116284		21393788	252.156	124.411	1.0191	2.62e-09
21393645	266.762	130.781	1.02812	5.16e-08		21408430	60.95	30.2652	1.01238	0.00658158		21407422	132.036	65.1486	1.01955	0.00140543
21398189	779.009	381.964	1.02874	1.26e-16		21395161	63.6243	31.5698	1.01249	0.00409256		21403207	169.352	83.5274	1.0196	2.12e-06
21394144	355.669	174.24	1.02884	5.48e-10		21406663	432.325	214.325	1.01267	5.08064e-10		21401033	473.539	233.505	1.02006	3.56e-13
112091044	570.87	279.738	1.0289	1.13e-12		21394234	1321.74	654.909	1.01324	1.25167e-13		21404583	129.263	63.7197	1.02032	2.88e-05
21409579	89.2871	43.8151	1.02967	0.00261326		21409609	334.554	165.674	1.01327	3.94698e-07		21396174	46.4734	22.8906	1.02239	0.0434417
21388245	37.0636	18.1367	1.03126	0.043746		21403996	725.078	359.2	1.01351	3.51767e-17		21386872	999.869	492.05	1.02273	4.67e-20
21393220	73.3151	35.8774	1.03291	0.0150153		112092652	80.6622	39.8985	1.01375	0.00673691		21398425	191.246	94.0806	1.02333	2.24e-07
21399056	4963.71	2423.09	1.03445	2.25e-17		21404484	792.314	391.951	1.01479	6.25713e-10		21391941	41.613	20.4795	1.02343	0.0208164
21410414	373.556	182.586	1.03449	2.89e-07		21397919	1157.55	572.641	1.01501	1.09974e-07		21390892	8994.86	4424.55	1.02355	1.22e-37
21388114	962.442	469.746	1.03507	0.0384671		21410411	985.084	487.512	1.01507	1.36813e-19		21404908	149.196	73.2734	1.02587	3.37e-05
21400930	129.45	63.1749	1.03536	0.000658948		21402399	346.08	171.265	1.01521	2.56639e-08		21399143	118.017	57.9248	1.02647	0.000118645
21401775	858.473	418.521	1.03562	3.81e-14		21406966	2082.05	1029.56	1.016	1.80688e-11		21402346	139.589	68.4887	1.02704	1.81e-05
21384597	86.9399	42.4328	1.03741	0.00388444		21391859	861.014	425.552	1.01676	9.85218e-15		novel.565	86.7662	42.5224	1.02771	0.0014344
21404751	703.387	342.594	1.03742	5.26e-15		21390276	162.498	80.2498	1.01715	5.03787e-06		21397753	79.9309	39.2059	1.02785	0.00114771
21404896	667.809	325.008	1.0384	3.72e-15		21393074	569.172	281.008	1.01811	1.12625e-08		112092473	582.029	285.3	1.02854	1.88e-16
21389837	1174.23	571.504	1.03892	5.89e-18		21392283	627.047	309.515	1.01855	1.9357e-12		21394434	1479.03	724.921	1.02883	2.44e-30
21404895	132.534	64.4449	1.04106	0.000418512		112091300	188.595	92.9476	1.01897	0.00824146		21386412	44.5582	21.8315	1.0292	0.0312172
21403887	399.746	194.241	1.04133	2.32e-10		21386057	3352.78	1653.74	1.0195	2.02494e-17		21384728	253.399	124.138	1.02973	2.74e-09
21399407	292.648	142.019	1.04202	8.43e-08		21399015	53.6849	26.5168	1.01969	0.00925815		21393998	284.68	139.417	1.02992	4.17e-10
21400642	1405.68	682.036	1.0428	3.51e-10		21384640	404.906	199.596	1.0197	9.77256e-11		21397206	871.753	426.837	1.03003	6.1e-16
21389277	71.845	34.9374	1.04285	0.0129117		21387379	387.159	190.934	1.0198	4.97269e-11		21391422	831.381	407.101	1.03021	6.27e-17
21400968	469.268	227.561	1.04325	2.22e-05		21399699	676.611	333.422	1.02041	4.96994e-12		21400644	523.774	256.478	1.03035	3.16e-12
21395545	1083.33	525.504	1.04349	3.77e-22		21403199	152.721	75.238	1.02139	8.92795e-05		21410436	1689.41	827.053	1.03046	9.72e-35
21406139	194.233	94.3192	1.04381	8.34e-05		21386278	151.922	74.7821	1.02203	1.25854e-05		21386612	43.8526	21.4571	1.03066	0.0183667
112091186	108.624	52.7011	1.04431	0.0092507		21392181	264.485	130.12	1.02229	1.71518e-06		21401090	112.883	55.2681	1.03066	6.56e-05
21410513	1002.2	485.503	1.04524	6.63e-21		21411210	158.154	77.9002	1.02241	5.23387e-06		21408643	42.5049	20.7908	1.03196	0.033225
21408794	1476.42	715.038	1.04581	4.21e-17		21388556	5559.33	2735.58	1.0231	4.72403e-36		21406437	34.1619	16.6967	1.03272	0.0350257
21385730	70.4222	34.0627	1.04871	0.00405445		21387864	53.3079	26.2637	1.02313	0.014443		21392810	684.9	334.713	1.03288	3.34e-18
21404046	122.292	59.2015	1.04946	0.00839998		21403496	173.429	85.2095	1.02328	2.73761e-05		21388178	177.688	86.7881	1.03288	1.91e-06
21394739	109.114	52.7039	1.05057	0.00557801		21401078	453.222	222.989	1.02337	2.50561e-12		21407105	231.892	113.299	1.03377	6.56e-08
21384914	274.492	132.51	1.05086	8.42e-09		21389190	1536.69	756.119	1.0234	5.43352e-13		21386101	3793.31	1852.28	1.0342	5.4e-34
112091453	100.384	48.587	1.05088	0.0301987		21387110	3058.81	1504.19	1.02391	1.75668e-08		21392774	150.945	73.7084	1.03458	5.52e-06
21394154	498.504	240.633	1.05157	2.23e-08		21386822	343.227	168.7	1.02395	1.93021e-06		21388033	547.577	267.276	1.0347	4.1e-17
21409562	170.539	82.3368	1.05256	0.00725004		21408538	190.063	93.3519	1.02509	7.61188e-07		21393642	1381.57	674.377	1.03485	4.96e-23
21398841	244.924	117.939	1.05285	6.87e-07		21387636	54.5865	26.8039	1.02571	0.0295184		21406430	438.87	214.187	1.03513	4.5e-14
21397328	67.8907	32.7989	1.05386	0.0127357		21391927	37.6498	18.49	1.02672	0.0315617		21407018	436.818	212.873	1.03667	6.39e-13
21398178	485.654	233.865	1.05402	2.6e-13		21409885	60.9186	29.9517	1.0269	0.00977842		21394808	578.013	281.823	1.03671	2.85e-15
21386586	181.159	87.1637	1.05432	3.05e-06		21399122	116.212	57.0568	1.02775	0.000404717		21407004	789.667	384.614	1.0376	1.42e-15
21402560	108.398	52.1971	1.05679	0.000696256		21393995	282.041	138.299	1.02796	1.76655e-08		21399126	155.505	75.7285	1.03819	3.73e-05
21410003	47.7482	22.9396	1.05768	0.038009		21394759	531.718	260.925	1.02802	3.16948e-09		21396582	68.7048	33.4654	1.03844	0.00798399
21399364	32702.7	15697	1.05889	5.31e-19		21411330	16016.5	7852.5	1.02829	7.13186e-10		novel.249	5324.9	2592.48	1.03845	1.86e-17
21387006	388.501	186.345	1.05935	4.34e-11		21396782	1291.07	632.848	1.02848	3.08621e-17		21386267	1179.14	573.928	1.03865	1.51e-24
21394615	553.166	265.506	1.05959	7.1e-14		21408222	2125.88	1040.6	1.03042	2.08827e-06		21391415	860.125	418.676	1.03871	8.02e-19
21393604	453.189	217.524	1.05976	3.22e-09		21387292	387.539	189.681	1.03046	8.31862e-11		21406747	167.539	81.4924	1.04002	3.4e-05
21392234	1947.51	934.273	1.05983	0.034865		21409967	217.971	106.749	1.0305	7.47206e-08		21391981	44.1692	21.483	1.04006	0.0136568
21405301	1407.83	674.608	1.06135	8.08e-26		21392744	4028.86	1971.93	1.03088	4.45003e-22		21410423	317.227	154.151	1.04043	4.95e-09
21394510	3030.21	1451.23	1.06195	4.65e-28		21384993	37.8049	18.485	1.03151	0.0295011		21387410	75.1847	36.517	1.04222	0.00233593
112090789	50.8819	24.3024	1.06532	0.0302066		21388700	37.0175	18.0893	1.03176	0.036044		21397575	417.951	202.831	1.04299	2.74e-12
21393557	1829.56	872.706	1.06803	3.79e-15		21385369	2817.42	1377.77	1.03208	5.47523e-24		21404355	129324	62747.2	1.04336	4.93e-56
21388753	2946.21	1404.76	1.06869	1.1e-29		21385293	436.377	213.224	1.03281	7.9478e-12		21408691	131.859	63.9255	1.04338	0.00014228
21400772	96.545	45.9587	1.06873	0.000973501		21408448	211.424	103.339	1.03298	4.78677e-06		21411327	49.316	23.9634	1.04342	0.0204168
21398631	67.0869	32.0294	1.07	0.0292822		21385561	502.462	245.465	1.03318	3.44587e-08		21396228	1264.24	613.421	1.04343	6.05e-24
21405111	106.866	50.907	1.0703	0.00032548		21403614	651.569	318.223	1.03327	1.00717e-12		21401670	416.27	201.975	1.04373	2.52e-13
novel.753	89.2618	42.4259	1.07064	0.00223924		112093760	171.096	83.4816	1.03403	3.45482e-05		21397664	301.206	145.991	1.04513	9.3e-11
21412879	118.523	56.2997	1.07085	0.00364644		21390048	763.647	372.984	1.03421	5.15782e-11		21402931	119.615	57.9254	1.04588	6.17e-05
21405179	369.815	175.754	1.07196	7.98e-10		21404890	1579.48	771.3	1.03426	8.21818e-16		21391881	516.573	250.149	1.04603	2.81e-15
21400936	301.571	143.445	1.07246	0.000233396		21392637	369.954	180.571	1.03451	2.53031e-10		21392309	34.5203	16.7054	1.04697	0.0334043
21409603	476.81	226.507	1.07249	2.22e-09		21391349	123.856	60.3928	1.03451	0.000382371		21405243	114.208	55.282	1.04715	0.000103353
21395857	82094.4	39021.5	1.073	2.7e-20		21399279	2156.49	1052.51	1.03465	2.96596e-14		21407505	154.446	74.72	1.04798	6.01e-06
21404279	583.791	277.3	1.07398	9.88e-11		21390735	212.429	103.625	1.03482	7.48204e-07		21386224	215.716	104.333	1.04802	2.71e-08
112093883	222.733	105.908	1.07399	2.01e-06		21392300	389.433	189.98	1.03485	4.45649e-07		21401744	155.183	74.9067	1.05013	5.13e-05
21391753	189.096	89.9167	1.07433	0.00104786		21394242	761.945	371.955	1.03506	1.30926e-11		21406883	321.808	155.369	1.05023	2.93e-10
21390940	335.77	159.38	1.0746	6.87e-10		21387749	614.777	300.043	1.03553	6.66949e-07		21391336	610.612	294.791	1.05035	4.41e-16
21408324	71.5516	33.8767	1.07492	0.0186915		21394207	1378.64	672.353	1.03603	1.77121e-16		21397062	491.904	237.398	1.05136	2.04e-13
112092277	466.007	220.763	1.07682	1.57e-09		21407193	119.777	58.4434	1.03631	0.000394771		112092195	36.7387	17.7169	1.05201	0.0256887
21398125	148.839	70.6548	1.07715	0.000451086		21392435	2616.12	1275.32	1.03659	0.00395223		21407885	340.744	164.309	1.05231	1.4e-11
21394314	155.221	73.5165	1.07735	1.09e-05		21394271	309.723	150.956	1.03705	6.93707e-08		21396623	538.451	259.716	1.05235	1.6e-14
112090901	104.787	49.5665	1.08012	0.000290391		21403552	782.254	381.008	1.03821	2.05039e-14		21390696	354.809	170.992	1.05291	4.97e-09
21394597	118.106	55.9171	1.08181	0.00825154		21409955	96.7651	47.0754	1.03901	0.00260956		21394444	2077.61	1000.87	1.05384	6.86e-27
21410216	67.1881	31.8487	1.08194	0.0225107		21389464	44.8705	21.8348	1.03939	0.0152537		21390942	351.114	169.099	1.05412	1.12e-12
21406137	34.9569	16.517	1.08242	0.0455844		21386666	227.281	110.304	1.04196	1.33802e-05		21399737	1699.03	817.489	1.05534	4.04e-28
112094897	120.486	57.0269	1.08254	0.00182395		21393226	3048.45	1480.04	1.04256	1.79086e-23		21409100	82.2399	39.5745	1.05559	0.00132483
21408224	63.3671	29.8697	1.08434	0.00917927		21393403	71.0854	34.5642	1.04265	0.00377068		21387673	63.861	30.6271	1.05906	0.0040347
21400546	786.985	370.632	1.08664	0.0441059		21401435	130.747	63.4089	1.04282	8.39689e-05		21389712	306.07	146.866	1.0591	1.9e-09
21410553	812.706	382.589	1.08665	2.84e-16		21385232	5360.93	2601.77	1.04287	8.16152e-19		21390673	1059.53	508.178	1.05995	2.38e-20
21385413	43.4803	20.42	1.08688	0.0406149		21405843	251.695	122.039	1.04357	1.57527e-07		21403699	1374.88	658.192	1.06281	1.62e-27
21403650	1063.26	500.39	1.08728	3.54e-23		21385270	835.471	405.259	1.04422	4.61883e-13		21394857	1267.48	606.788	1.06288	4.52e-26
21407280	40.7374	19.19	1.08867	0.0444397		21385201	317.098	153.622	1.04581	9.25914e-09		21403285	2493.11	1193.11	1.06329	7.36e-37
21384413	145.268	68.3107	1.08903	1.1e-05		21394509	450.202	217.911	1.04602	4.23275e-05		21396505	889.755	425.448	1.06468	1.93e-20
21386411	102013	47897.6	1.09072	3.69e-18		21407856	619.012	299.738	1.04654	1.51122e-12		21395750	104.848	50.1238	1.06468	0.000165937
21405264	64.3584	30.1019	1.09568	0.00533332		21405481	42.3492	20.5244	1.04784	0.0227662		21397546	341.156	163.006	1.06567	1.77e-12
21401705	64433.8	30131.9	1.09651	2.86e-31		21400699	94.3591	45.6153	1.04793	0.000251831		21393131	201.212	96.0948	1.06595	1.32e-07
21384774	2757.69	1288.86	1.09699	5.49e-15		21386445	530.962	256.877	1.04802	7.72185e-07		112095201	57.0648	27.2457	1.06603	0.00460587
21404330	86.7677	40.5929	1.09719	0.00156034		21401651	464.24	224.431	1.04837	8.95471e-12		21386079	296.306	141.451	1.06671	4.3e-11
21391927	38.1866	17.8392	1.09808	0.0359932		21389837	1224.31	592.034	1.04863	1.80592e-08		21411729	39.3677	18.7742	1.06876	0.0219207
21391888	189.414	88.6084	1.09877	0.00144993		21406699	597.238	288.834	1.04875	1.94363e-13		21410459	65.083	31.0323	1.06889	0.00534729
21401296	107.633	50.2754	1.09954	0.000198211		21401713	521.128	251.606	1.05079	2.36511e-12		21390944	147.309	70.2102	1.06906	1.16e-05
21409784	514.015	239.706	1.09958	1.05e-05		21412437	4840.25	2336.32	1.0509	2.87098e-24		21406659	9217.82	4387.78	1.07094	8.3e-31
21387981	62.5594	29.1122	1.10031	0.0114358		21388038	127.458	61.4199	1.05154	0.0001088		21388389	353.398	168.095	1.0721	1.03e-12
112092982	1006.96	469.573	1.10042	0.0396384		21390189	314.565	151.682	1.05223	2.65787e-09		21410760	100.286	47.6649	1.07234	0.000109667
21410228	835.287	389.402	1.10091	4.48e-21		21391363	193.398	93.2794	1.05235	1.01022e-06		21409006	1423.32	676.795	1.07247	7.34e-28
21403372	87.5921	40.7908	1.10188	0.00213342		21407994	55.6985	26.8291	1.05306	0.00568809		112090509	109.684	52.1413	1.07251	7.73e-05
21392519	53.6196	24.95	1.10268	0.00917927		novel.679	64.696	31.1729	1.05322	0.00480878		21389486	122.63	58.2822	1.07285	9.75e-05
21396627	45.8839	21.3926	1.10374	0.0237978		21396228	1253.19	604.012	1.0533	7.3131e-22		21403267	1250.24	594.256	1.07311	3.92e-29
21390183	185.764	86.3581	1.10442	2.32e-06		21392552	477.529	229.915	1.05354	3.75848e-10		21407038	3807.64	1808.09	1.07443	9.51e-28
21408396	77.9152	36.2774	1.10542	0.00216489		21400346	34.199	16.467	1.05361	0.0440442		21397110	785.166	372.785	1.07485	8.84e-23
21405474	202.182	93.9216	1.10595	3.3e-07		21387296	1486.63	715.817	1.05415	2.56877e-15		21410318	1653.18	784.755	1.07505	7.44e-30
21402896	55.6334	25.8866	1.10597	0.0106481		21388429	1002.79	482.647	1.05445	3.85488e-12		21387636	57.3923	27.2243	1.07514	0.0137482
21408970	793.946	368.297	1.10743	6.69e-17		21402639	1843.82	886.624	1.05615	5.06345e-12		21396192	196.786	93.3503	1.07544	3.06e-07
21394943	62.1545	28.8559	1.10784	0.0125685		21406706	455.92	219.387	1.05632	2.84979e-10		21394008	289.915	137.526	1.07634	9.36e-09
21397013	794.483	368.221	1.10869	4.42e-13		21409533	305.64	146.958	1.05659	6.67883e-08		21384000	1257.47	596.275	1.0766	0.000512689
112093716	413.108	191.633	1.10957	9.21e-06		21404655	80.4024	38.5982	1.05661	0.00118379		21400437	590.635	279.889	1.07776	4.51e-13
21390814	218.755	101.399	1.10977	3e-07		21400829	245.088	117.784	1.05748	8.05693e-08		21398659	1615.73	764.606	1.07934	6.5e-34
21391864	5828.7	2697.88	1.1113	4.15e-13		21393557	1882.62	904.116	1.05835	1.38148e-12		21388604	103.12	48.8149	1.0798	0.000235534
21400192	298.129	138.058	1.11237	8.91e-08		21405045	7953.69	3818.21	1.0588	7.31758e-14		novel.215	30.9684	14.6371	1.08009	0.0385458
21391680	532.43	246.355	1.1125	1.77e-12		21403527	292.644	140.432	1.05887	2.31218e-08		21409651	258.108	122.081	1.08013	2.16e-08
21408490	48.288	22.3469	1.11396	0.0149025		21386697	799.868	383.649	1.06001	8.63882e-14		21390522	675.504	319.169	1.08129	1.88e-19
21406290	109.33	50.5894	1.11406	0.00132044		21395808	65.7799	31.5715	1.06006	0.0414193		21393355	472.39	223.183	1.08149	3.32e-16
112090841	74.901	34.5924	1.11472	0.00234368		21392096	74.395	35.6117	1.06024	0.0121288		21405871	806.414	380.963	1.08207	1.6e-23
21409003	3302.41	1524.63	1.11499	2.93e-36		21405325	65.9132	31.5312	1.06034	0.00699025		21390031	360.083	170.061	1.08219	1.28e-12
21390798	96.9945	44.8186	1.115	0.000898626		21400476	461.591	221.215	1.06072	3.24647e-12		21389966	904.624	427.142	1.08255	1.24e-23
21392860	177.882	81.997	1.11534	8.94e-06		21401151	580.919	278.551	1.06073	3.88397e-14		21409230	1122.15	529.696	1.08306	7.78e-19
21390237	4218.35	1945.75	1.11651	3.93e-16		21389602	256.463	122.872	1.06073	1.1964e-05		21410155	282.457	133.268	1.08359	5.13e-11
112094634	485.882	223.737	1.1182	2.47e-13		21405350	1608.41	770.502	1.06144	1.37599e-09		21408251	103.507	48.823	1.08493	0.000114888
21407709	507.984	234.2	1.11846	3.66e-07		21409092	182.306	87.4163	1.062	9.4476e-06		21407780	511.89	241.183	1.08537	1.55e-12
21401043	297.761	137.251	1.11851	3.11e-07		21398931	141.743	67.787	1.06377	0.00256021		21392897	924.241	435.325	1.08613	1.4e-26
21409626	230.643	106.235	1.12036	7.58e-07		21384034	109.095	52.1956	1.06397	0.00390792		21403935	978.02	460.686	1.08622	1.4e-22
21405838	160.829	73.9525	1.12058	3.91e-05		21402365	1349.26	644.904	1.06495	1.31891e-18		21403933	2468.76	1159.52	1.09019	1.67e-33
21407698	91.6252	42.2171	1.12142	0.00218372		21384366	321.208	153.438	1.06672	3.39429e-10		21404734	549.644	258.18	1.09037	4.12e-17
21409651	252.178	116.002	1.12172	3.43e-08		21386913	1315.22	627.575	1.06706	8.97094e-19		21391782	175.716	82.5055	1.09074	1.42e-06
21395181	544.925	250.599	1.12192	6.07e-12		21390545	665.766	317.741	1.06706	1.25574e-13		21406654	109.655	51.4363	1.09157	3.5e-05
21384398	78.5037	35.9828	1.1231	0.00629144		21386046	7828	3735.26	1.06738	3.9755e-29		21391530	203.932	95.6324	1.09164	2.45e-06
21395456	118.618	54.3539	1.12335	0.00018462		21405053	905.126	431.994	1.06768	9.92927e-16		21397122	243.355	114.176	1.09178	1.04e-07
21387687	2023.02	928.334	1.12419	5.64e-16		21395919	5251.76	2505.42	1.06788	2.52656e-15		21389733	1776.22	833.122	1.09223	8.14e-22
21392726	44.353	20.3341	1.12477	0.0330651		21392224	1419.45	677.168	1.06808	5.42833e-17		112091520	444.056	208.225	1.09259	1.4e-11
21398162	309.173	141.593	1.12616	1.91e-08		21391882	266.111	126.872	1.06867	8.2332e-08		21385351	477.07	223.627	1.09316	8.3e-15
21397160	2236.48	1023.51	1.12758	0.00176178		21396274	544.621	259.637	1.06879	1.23956e-11		21389899	613.988	287.694	1.09359	1.97e-20
112093471	306.199	139.997	1.12932	9.34e-11		21390845	398.689	190.099	1.06881	3.13435e-12		21403825	515.953	241.704	1.09397	6.1e-18
112092380	412.681	188.58	1.13126	1.07e-07		21385789	1795.47	855.527	1.06943	4.17321e-19		21401594	66.1524	30.947	1.09454	0.0043469
21399108	2214.34	1011.12	1.13132	1.17e-14		21402598	1567.52	746.897	1.06951	4.38309e-25		21393883	48.7449	22.81	1.09454	0.0146333
21398572	81.6721	37.2917	1.13271	0.00129146		21403079	967.336	460.651	1.07044	2.23398e-22		21385236	41.59	19.4923	1.09518	0.0165805
21396702	215.257	98.2583	1.13292	1.45e-07		21398952	1437.19	684.261	1.07085	9.21249e-10		112090681	36.4404	17.0437	1.0962	0.0248228
21385590	439.068	200	1.1355	5.48e-11		21406086	144.568	68.9052	1.07089	0.000102307		21407000	304.019	142.122	1.09694	5.02e-11
21388982	177.129	80.7332	1.1364	0.000558289		21389558	4236.63	2015.6	1.0716	5.31368e-27		21398347	464.849	217.267	1.0976	1.97e-15
21395182	85.5809	38.8719	1.13699	0.00170087		21398041	2708.85	1288.85	1.07162	0.00808552		21404685	62.9043	29.4082	1.09838	0.0052809
novel.201	50.0054	22.7062	1.13991	0.0087658		21393174	140.998	67.0753	1.07228	1.69897e-05		21407765	149.024	69.5668	1.09913	1.87e-06
21392051	1330.45	603.2	1.14085	1.03e-21		21392944	84.7174	40.2947	1.07255	0.000546243		21392717	272.712	127.36	1.09922	1.28e-08
novel.554	480.454	218.07	1.1411	1.53e-08		21384654	327.408	155.623	1.07267	1.0304e-09		21404497	910.081	424.593	1.10001	4.74e-19
21408132	431.651	195.143	1.14393	2.04e-06		21394454	3240.58	1540.61	1.07284	1.24503e-28		21391840	196.575	91.7179	1.10004	2.6e-07
21396898	834.44	377.434	1.14504	4.41e-17		21395282	230.539	109.51	1.07331	4.03807e-06		21385555	142.379	66.405	1.10015	0.000205705
21408650	171.848	77.7158	1.14525	1.28e-06		112092660	138.416	65.7785	1.07337	5.3071e-06		21396458	54.8259	25.5759	1.10019	0.00417824
21397391	415.255	187.532	1.14652	2.37e-14		21385231	187.769	89.271	1.07398	1.00773e-05		21386951	877.007	408.923	1.10069	7.81e-20
21408455	817.73	368.446	1.14961	3.89e-16		21392940	343.915	163.323	1.07445	6.17388e-07		21396629	79.016	36.8117	1.1018	0.000407251
21410047	1331.31	599.908	1.15025	7.41e-23		21407122	3240.71	1538.81	1.07463	5.55027e-16		21406490	781.156	363.891	1.10227	5.88e-19
21388228	70.4908	31.7485	1.15055	0.00166958		21404740	167.78	79.6684	1.07493	2.78153e-06		21395282	238.817	111.232	1.10247	7.61e-06
112095227	71.1336	32.1181	1.15107	0.00751913		21397715	204.509	97.1282	1.07538	3.16084e-07		21408355	243.219	113.228	1.10312	2.46e-09
112091820	38.2317	17.1383	1.15311	0.0363656		21386558	414.469	196.718	1.07552	2.6588e-11		21410168	179.264	83.3975	1.10334	3.02e-06
21394676	428.296	192.174	1.15533	1.17e-11		21385243	175.472	83.2305	1.07706	1.18061e-06		21398782	282.1	131.184	1.10439	6.51e-11
21411363	155.186	69.5642	1.15547	0.00554309		21404272	131.077	62.144	1.07762	1.49639e-05		21409995	257.332	119.453	1.10634	5.48e-09
112091247	55.0199	24.6342	1.15702	0.0172455		21405018	229.779	108.806	1.07809	2.02691e-06		21398907	157.034	72.9175	1.10643	4.29e-07
21393399	62.7176	28.1619	1.15906	0.0169192		novel.378	629.95	298.157	1.07859	4.35306e-12		21390082	8817.79	4094.8	1.10661	2.89e-62
21409392	2565.55	1147.95	1.16029	0.0427786		21392606	142.502	67.3823	1.0794	0.000161453		21390229	1599.36	742.435	1.10724	1.01e-32
21394827	65.0868	29.1654	1.16256	0.0269658		21409006	1407.87	666.418	1.07945	3.19023e-18		21408585	31.606	14.6736	1.1075	0.0339143
21390842	108.211	48.2237	1.1639	0.000170589		112090258	487.926	230.611	1.08169	5.49051e-12		21402419	908.49	421.113	1.1094	6.96e-13
21406652	95.8014	42.6999	1.16557	0.000215616		21401329	316.149	149.442	1.08187	1.73553e-10		21389683	191.142	88.51	1.1101	2.48e-07
21392260	68.3491	30.3771	1.1659	0.0251552		novel.191	47.5713	22.4891	1.08229	0.0141923		21393136	75.0981	34.7794	1.1108	0.000615258
21411655	47.3167	21.0791	1.16894	0.0194731		21404114	260.122	122.826	1.0835	5.45278e-08		21388657	111.862	51.7815	1.11087	2.03e-05
21408363	291.482	129.424	1.16977	1.29e-08		21390884	178.006	83.9114	1.08509	4.93736e-06		21408413	469.592	217.114	1.11284	4.1e-12
21405394	209.635	93.2665	1.17048	2.13e-05		21397181	164.595	77.5464	1.08535	8.18078e-07		21404855	108.35	50.0852	1.11289	4.86e-05
21393894	1156.27	513.236	1.17252	6.61e-16		21408698	183.169	86.3697	1.08542	7.61128e-07		21398554	336.164	155.395	1.11295	4.8e-10
21408358	2704.78	1200.08	1.17273	4.39e-18		21398631	70.481	33.1913	1.08548	0.00426545		21412306	135.755	62.7393	1.11366	3.94e-06
21385600	34.1989	15.2023	1.1732	0.0458107		21405914	385.684	181.819	1.08563	2.4084e-09		21389825	755.094	348.63	1.11475	1.21e-20
21386489	359.031	159.231	1.17451	9.74e-07		112095231	2755.55	1298.35	1.08566	5.15769e-17		21396273	108.572	50.1559	1.11481	0.000171824
21388240	1232.71	545.937	1.17474	2.02e-26		21394437	36.3628	17.1043	1.08736	0.0258516		21402825	319.106	147.342	1.1152	1.04e-11
21401527	931.771	412.293	1.17636	1.38e-20		21386792	139.745	65.8298	1.08755	4.09491e-05		21396344	704.653	325.174	1.11559	5.66e-22
21395244	6301.97	2788.44	1.17651	1.79e-22		novel.1240	45.7367	21.4909	1.08821	0.0139972		21401563	2059.01	949.42	1.11702	2.64e-33
21387057	38.1971	16.8678	1.17686	0.0396575		21398414	276.722	130.062	1.08826	4.83537e-07		21388664	598.165	275.642	1.11749	5.44e-18
21397719	57.1651	25.3265	1.1794	0.018583		21390149	7450.16	3503.46	1.08851	4.42968e-15		21390301	7792.09	3589.14	1.11838	7.91e-45
21406987	156.207	69.1003	1.1796	0.000124036		21408997	386.546	181.856	1.08859	1.7617e-08		21395504	433.729	199.719	1.11867	1.56e-14
21397681	44.7366	19.7918	1.18004	0.0325971		21403265	664.988	312.547	1.08964	9.95478e-11		21384682	79.8843	36.7689	1.11903	0.00148426
21384512	711.518	313.818	1.18026	1.51e-15		21401170	315.174	148.121	1.08967	5.33897e-09		21387709	343.852	158.218	1.11989	5.44e-12
21400079	389.708	171.886	1.18239	3.84e-07		21397772	92.2577	43.2805	1.08977	0.000420301		21394358	1386.18	637.671	1.12022	3.05e-23
21405410	60.2432	26.5754	1.18258	0.00445414		21392818	2964.83	1392.4	1.0903	3.63339e-22		21397465	487.712	224.389	1.12025	7.36e-16
21388322	731.876	322.424	1.18289	0.0479377		112090329	360.283	169.276	1.09061	1.67193e-09		21393044	2609.94	1200.47	1.12038	1.15e-46
21389043	6974.12	3071.35	1.18299	3.2e-15		21389898	32.0967	15.1016	1.09077	0.0393056		21407347	137.725	63.2728	1.121	2.21e-05
novel.1220	284.878	125.482	1.18369	9.94e-09		21407160	301.582	141.439	1.09107	0.000103383		21410232	393.213	180.703	1.12165	5.54e-13
21391252	66.3243	29.1459	1.1862	0.00430818		21384904	72.8716	34.2062	1.09119	0.00104834		21396685	448.008	205.838	1.12182	3.38e-12
21400604	185.501	81.6193	1.18635	3.4e-06		21404006	554.986	260.341	1.09187	2.63665e-11		21391987	337.404	155.078	1.12217	2.42e-09
novel.744	44.2859	19.4514	1.18711	0.0262589		21396205	655.694	307.557	1.09199	8.15453e-16		21398180	32.5877	14.9457	1.12238	0.038839
21409243	5009.42	2199.02	1.18773	0.000454803		112092715	93.6858	43.9885	1.09232	0.00193996		21384190	279.264	128.244	1.12298	2.35e-11
21393636	136.826	59.9768	1.1878	4.2e-05		21386466	418.739	196.326	1.09304	3.04382e-11		21409777	260.452	119.539	1.1232	1.35e-07
21410362	182.316	79.8642	1.19061	3.81e-06		21396458	53.7513	25.1813	1.09371	0.00967933		21408298	1405.03	644.886	1.12359	6.32e-35
21388593	596.928	261.426	1.19087	5.52e-15		21390449	91.0116	42.6366	1.09405	0.000137635		21389832	318.567	146.158	1.12373	1.74e-12
21408342	805.256	352.205	1.19248	8.27e-21		21387657	822.606	385.374	1.0942	7.27486e-15		21392283	685.046	314.336	1.12397	8.09e-22
21407006	1078.35	470.048	1.1977	1.67e-26		21399551	600.004	280.894	1.09448	1.85902e-14		112094975	63.2294	29.0155	1.12435	0.00276027
21384423	38.5218	16.7882	1.2005	0.0469034		21409858	788.815	369.244	1.09541	5.4893e-13		21398933	972.869	445.995	1.12529	4.28e-27
21392918	3078.86	1339.46	1.20062	3.91e-18		21385509	305.554	142.941	1.09545	2.10676e-07		21390858	130.218	59.6482	1.12639	7.19e-06
21400838	41.7108	18.1012	1.20163	0.0157905		21401291	4376.13	2047.42	1.09582	2.48203e-30		21401745	277.04	126.774	1.12758	7.29e-11
21404085	586.38	254.968	1.2025	7.75e-16		21390076	76.0799	35.5862	1.09583	0.00213735		21387262	582.906	266.712	1.12766	2.37e-17
21384973	125.732	54.7046	1.20322	0.00120267		21389485	322.675	150.912	1.09614	7.20571e-08		21408021	275.023	125.842	1.12815	1.02e-10
21404901	35.1453	15.2681	1.20356	0.0308195		21400789	54.5287	25.5204	1.09643	0.00554432		21390870	161.881	74.0465	1.12892	4.98e-07
novel.679	69.4691	30.0773	1.20413	0.00294926		21405247	538.709	251.898	1.09723	8.76645e-15		21403886	255.039	116.539	1.12967	1.15e-10
21399396	109.374	47.5417	1.20472	0.0125081		21398591	49.552	23.1876	1.09768	0.0071039		21412538	67.0686	30.6285	1.12978	0.00180967
21387893	381.734	165.279	1.20726	2.44e-13		21390226	2341.59	1093.52	1.09853	5.89848e-16		21401009	67.1081	30.6262	1.13057	0.00220829
21400101	128.382	55.6686	1.20798	0.000459597		21392266	174.867	81.628	1.09892	1.25448e-05		21407178	286.037	130.535	1.13159	1.11e-11
21398465	125.318	54.3304	1.20818	0.0102403		21389305	112.028	52.2852	1.09988	0.00138242		21400578	465.098	211.754	1.13475	2.49e-11
21398244	157.957	68.3726	1.20999	1.25e-05		21401009	64.5937	30.1633	1.10011	0.00629516		21405689	1007.62	458.444	1.13636	6.91e-27
112094809	1620.87	700.008	1.21085	1.34e-25		21402527	820.803	382.939	1.1002	2.65104e-12		21410437	479.055	217.956	1.13644	1.17e-15
21399683	103.672	44.6978	1.21131	0.00110545		21385642	110.214	51.3693	1.1018	3.44038e-05		112090619	27.754	12.622	1.13686	0.0475513
21411521	101.906	44.1011	1.21172	0.000325609		21392034	338.995	158.039	1.10185	1.11774e-08		21406474	1217.85	553.587	1.13725	7.61e-25
21406195	85.7621	36.9467	1.2119	0.00352735		21405871	804.965	375.108	1.10209	7.81423e-19		21407272	34.4901	15.6528	1.13877	0.0248866
21402336	266.525	114.88	1.21216	3.04e-08		21409854	409.365	190.807	1.10217	1.2988e-09		112091577	78.6711	35.6973	1.13888	0.00424637
112092313	811.57	350.298	1.21241	0.00552161		112093716	426.67	198.628	1.10234	7.01468e-10		21407045	311.508	141.436	1.13893	1.29e-12
novel.156	103.906	44.7419	1.21273	0.00202203		21408331	5847.67	2722.78	1.1028	1.46246e-28		21401159	311.733	141.481	1.13978	3.54e-12
21402863	135.935	58.6964	1.21315	9.32e-06		21410032	2928.07	1363.25	1.10285	5.11634e-24		21395595	693.878	314.722	1.1406	3.49e-14
21410408	468.566	201.904	1.21323	8e-08		21385923	337.219	156.968	1.10386	7.96935e-09		21408667	252.749	114.578	1.14158	3.36e-10
21410494	161.122	69.3818	1.2151	6.67e-07		21394445	44.0227	20.5092	1.1041	0.0145962		21386067	967.308	438.266	1.14226	0.00111997
21388552	124.618	53.6777	1.21552	5.36e-05		21389814	1559.1	724.986	1.1046	1.53024e-24		21405292	489.594	221.669	1.14263	1.19e-14
21396644	366.57	157.792	1.21757	4.1e-09		21400809	314.067	146.057	1.10481	1.64264e-09		21407736	351.48	159.083	1.14331	2.25e-11
21392112	47.9469	20.6602	1.21766	0.03584		21409036	522.854	242.965	1.10546	2.39417e-12		21412093	493.138	223.119	1.14394	9.08e-15
21410264	167.161	71.8481	1.21918	1.49e-06		21400750	112.718	52.3572	1.10548	0.0011676		21406584	51.9248	23.482	1.14397	0.0120717
21388683	95.4781	41.0441	1.22054	0.031011		21395799	81.672	37.9387	1.10584	0.00297894		21397028	307.771	139.217	1.14398	1.08e-09
112092915	222.024	95.1355	1.22064	6.59e-07		21405373	453.93	210.754	1.10623	4.92134e-11		21384615	358.656	162.261	1.14417	5.93e-14
21403786	1002.54	430.402	1.22072	9.8e-10		21388104	369.376	171.472	1.10647	1.01595e-11		112094609	73.1846	33.0866	1.14567	0.000632299
21405434	550.465	235.557	1.22488	2.29e-19		112091552	28.9411	13.4152	1.10729	0.0490219		21399095	58.3609	26.4078	1.1461	0.030361
21401644	75.7005	32.3423	1.22677	0.000790414		21409978	229.326	106.388	1.10739	2.12231e-08		21388768	117.784	53.2218	1.14623	4.68e-05
21398304	162.506	69.3068	1.22691	1.32e-05		21409249	680.224	315.42	1.1081	2.60257e-05		21403321	164.458	74.2537	1.14667	2.13e-07
21402897	34.0763	14.5689	1.22809	0.0373327		21405284	46.3097	21.5003	1.10844	0.0158484		112090419	1248.21	563.788	1.14668	2.6e-16
21406747	181.505	77.4498	1.22865	1.88e-07		21401563	2015.2	934.791	1.10851	3.49884e-17		21399183	327.638	147.943	1.14698	2.92e-13
21386552	28.841	12.2948	1.23036	0.0428813		21407360	84.8595	39.2519	1.11047	0.000336581		21401824	55.1249	24.8605	1.14836	0.00608351
21405803	41.1642	17.5177	1.23084	0.0139025		21393826	189.287	87.7277	1.11077	2.67964e-06		21403166	603.531	272.199	1.14906	5.02e-20
21406344	131.812	56.147	1.23309	2.6e-05		21402167	121.752	56.4056	1.111	4.90701e-05		21396977	498.874	224.877	1.14926	1.19e-16
21406354	148.612	63.2831	1.23373	7.7e-06		21406385	526.477	243.803	1.11117	1.02037e-13		21411199	3798.54	1711.53	1.15015	3.77e-44
21400592	35.1508	14.9014	1.23475	0.0410521		21388619	829.402	384.064	1.11122	2.02942e-18		21404991	316.309	142.506	1.15034	1.3e-12
21394820	137.297	58.3165	1.23505	1.01e-06		21411756	199.28	92.0976	1.11148	0.000272815		21385289	89.2954	40.2323	1.15038	0.000121209
21399591	398.306	169.033	1.23589	1.53e-14		21401124	366.89	169.88	1.11157	8.22941e-09		112094606	507.637	228.599	1.15061	1.51e-17
21397461	288.016	122.113	1.2366	4.62e-11		21392553	219.762	101.797	1.11163	2.17778e-07		21383975	62.8626	28.2745	1.15232	0.00116679
21400193	222.044	94.2529	1.23713	9.19e-09		112093301	956.011	441.846	1.11318	1.62636e-18		112093916	483.637	217.565	1.15264	2.47e-17
21390863	356.047	151.206	1.23714	2.65e-10		21389727	2094.74	968.21	1.11349	1.71399e-28		21391392	45.5102	20.4697	1.1528	0.0147522
21392623	543.245	230.585	1.23757	1.56e-06		21395264	2274.24	1050.68	1.11408	2.86768e-20		21394822	90.2557	40.587	1.15336	0.000163332
21408880	3427.22	1452.62	1.23813	3.04e-19		21390948	57.3451	26.4601	1.11433	0.00392793		21399696	373.152	167.734	1.15355	3.67e-13
112094039	190.354	80.724	1.23967	9.03e-06		21398379	7204.6	3327.58	1.11445	1.46243e-14		21388994	34.181	15.3308	1.15632	0.0176626
21401962	51.2524	21.6763	1.23968	0.00825154		21396798	2733.27	1261.69	1.11527	3.33413e-37		21391606	1170.01	524.519	1.15749	1.28e-16
21391901	1346.66	569.545	1.24098	2.25e-12		21406110	103.21	47.6432	1.11564	0.00046058		21398744	750.414	336.277	1.15786	6.24e-21
112091302	646.281	273.25	1.24278	5.41e-09		21408643	44.4287	20.4718	1.11588	0.00872024		21408354	425.321	190.568	1.15823	1.43e-16
21406168	315.044	132.99	1.24295	6.28e-07		112091036	195.111	89.9614	1.11595	9.47966e-08		21410399	67.7095	30.3318	1.15837	0.00112413
21389083	81.1684	34.3201	1.24432	0.000796584		novel.828	36.3932	16.7871	1.11596	0.0343837		21409614	18807.4	8423.96	1.15873	5.94e-46
21396995	332.871	140.653	1.24432	3.04e-09		21393631	177.671	81.9958	1.1163	7.71749e-07		21394759	591.578	264.995	1.15885	1.23e-20
21392599	39.0511	16.5193	1.24451	0.0170566		21400930	141.89	65.4684	1.11645	2.18672e-06		112093991	348.83	156.174	1.15952	5.85e-12
21389958	161.756	68.3337	1.24545	0.000545372		21407233	2122.93	979.068	1.11686	3.05044e-15		21387766	175.649	78.5771	1.15965	3.57e-06
21396111	124.246	52.4734	1.24552	2.23e-05		21405462	3239.49	1493.09	1.11751	4.36702e-32		112093788	1413.58	632.457	1.16052	3.62e-30
21385421	371.953	156.789	1.24691	0.0212182		21398389	110.003	50.6647	1.11823	2.22303e-05		21410172	2149.69	960.683	1.16184	4.88e-37
21398958	260.355	109.657	1.24724	2.68e-09		21402998	25.4968	11.7415	1.1189	0.0469634		112094264	65.7841	29.4246	1.16194	0.019653
21399176	95.2221	40.1952	1.24747	0.000280641		21387309	51.7596	23.7747	1.11912	0.0093778		21396436	45.7987	20.4429	1.16326	0.00582641
21386376	49.9393	21.0825	1.24939	0.0221724		21399331	654.59	301.416	1.11961	1.33049e-10		21412027	50.3375	22.4535	1.16327	0.00565044
21409188	270.129	113.517	1.25046	3.47e-10		21391254	551.014	253.28	1.12121	3.914e-11		21401497	74.7955	33.3869	1.16331	0.000364534
21392053	32.3735	13.5534	1.25099	0.046177		21399178	358.364	164.736	1.12135	1.26567e-09		21409743	55.7689	24.8926	1.16398	0.0026529
21394022	286.374	120.23	1.25245	1.15e-11		21389845	106.59	48.9832	1.12186	3.05075e-05		21398389	115.376	51.4509	1.16495	5.05e-05
21409387	2485.18	1042.78	1.25288	1.43e-17		21398776	54.7869	25.132	1.12321	0.0214326		21393995	315.074	140.45	1.16557	3.12e-13
21405367	785.175	329.379	1.25381	2.69e-18		21404918	249.152	114.441	1.12365	4.20124e-06		21384654	354.777	158.038	1.16611	1.52e-13
21401300	3001.6	1257.9	1.25491	6.82e-41		21388695	868.161	398.096	1.12459	2.2864e-19		21392441	208.307	92.741	1.1675	1.12e-08
112094825	497.953	208.339	1.25557	5.27e-10		21399583	744.283	341.186	1.12514	7.88442e-18		21401439	1182.35	525.784	1.16915	1.09e-30
21394887	122.249	51.2417	1.25611	4.75e-05		21397666	191.144	87.5603	1.12562	2.03804e-07		21386313	474.859	210.745	1.17148	6.2e-15
21402399	395.695	165.267	1.26001	4.18e-15		21386513	1163.97	533.362	1.12571	1.30777e-19		112092839	86.7367	38.4958	1.17152	9.8e-05
21404514	68.8603	28.8015	1.2604	0.0276347		21397709	63.1156	28.8618	1.12634	0.00585472		21403980	126.713	56.2056	1.17236	6.94e-06
112095312	52.8595	22.0282	1.26605	0.00424155		21390530	551.491	252.582	1.12653	1.11051e-11		21406758	438.164	194.4	1.17266	3.26e-15
21398974	295.574	122.866	1.26844	1.32e-07		112094063	102.606	46.9956	1.12717	4.03634e-05		21405767	286.069	126.916	1.17282	5.35e-11
21410001	35.094	14.6016	1.26852	0.026611		21399026	353.283	161.615	1.12783	1.2503e-09		21402603	86.1359	38.1797	1.17363	0.000286577
21403685	314.083	130.49	1.26898	3.34e-06		21384045	61.5094	28.1838	1.1285	0.0317703		21405263	2096	928.978	1.17391	3e-49
21400522	675.154	280.031	1.269	6.44e-21		21410504	649.981	297.308	1.12875	5.55142e-09		21400193	223.781	99.1645	1.17395	4.6e-10
21402967	778.989	323.22	1.26939	0.0160853		21390710	1065.63	487.203	1.12938	1.77901e-21		21388400	185.373	82.0862	1.17479	5.24e-08
21397643	888.018	368.013	1.27044	9.16e-17		21385579	1289.85	589.275	1.13062	5.1004e-15		112091868	397.844	176.183	1.1757	1.72e-10
21396918	124.094	51.4939	1.27157	0.0110832		21388659	94.008	42.9402	1.13093	0.000862916		21405462	3430.09	1516.37	1.17763	1.75e-56
21393633	839.125	347.347	1.27196	8.26e-10		21406290	114.844	52.4425	1.13096	0.000358075		21390391	84.1042	37.1872	1.17791	0.00075624
21401263	1263.31	522.552	1.2731	2.31e-17		21389586	81.5888	37.2195	1.13155	0.00132113		21386251	876.116	387.205	1.17794	1.55e-28
21405299	905.588	374.38	1.27402	3.54e-23		21388882	275.812	125.853	1.13201	6.28838e-10		21408030	83.1949	36.738	1.17809	0.000570671
21399561	31.3815	12.931	1.27724	0.0321127		21407253	3302.56	1506.1	1.1328	3.05907e-10		21388968	644.71	284.952	1.17837	9.25e-18
21393309	192.4	79.3807	1.2783	4.02e-07		21387186	1261.9	575.5	1.13298	6.76889e-14		21403399	239.019	105.637	1.17885	4.28e-06
21392916	6811.26	2807.69	1.27849	2.39e-27		21408215	7945.89	3622.78	1.13315	9.18462e-47		112091247	58.6748	25.9059	1.17944	0.00266513
21388959	44.0823	18.1287	1.27863	0.0175839		21405396	1352.55	616.635	1.13337	1.60252e-25		21399122	131.282	57.9486	1.17966	4.52e-06
21401579	476.393	196.199	1.2787	8.44e-15		21399650	218.999	99.7025	1.13363	5.76944e-07		21408962	360.796	159.273	1.17993	7.1e-15
21391053	144.573	59.6192	1.28001	1.67e-06		21385448	37.5471	17.1319	1.13556	0.0302685		21412567	50.2941	22.1615	1.18244	0.00375144
21402776	1806.74	744.083	1.28012	1.91e-25		21384827	71.5331	32.5273	1.1358	0.00175945		21399593	312.036	137.383	1.18357	2.56e-12
112092718	110.23	45.2893	1.28036	5.95e-05		21406898	60.6797	27.5782	1.13667	0.00619286		21394305	911.522	401.195	1.18399	6.14e-23
21406376	129.638	53.4763	1.28058	4.4e-05		112091973	113.71	51.7109	1.13767	1.3336e-05		21386527	413.35	181.669	1.18596	3.45e-16
21410128	70.0488	28.7963	1.28068	0.000996732		21392441	200.919	91.3169	1.13826	3.2985e-07		21387849	116.386	51.1601	1.18616	3.48e-06
21409365	40.0598	16.5033	1.28209	0.0133863		21398907	158.132	71.8	1.13841	2.81746e-05		21388986	178.589	78.4955	1.18656	3.8e-07
21406805	116.657	47.9222	1.28429	5.65e-06		21404842	803.974	365.141	1.13871	3.76738e-09		21399443	681.007	299.291	1.18658	3.75e-22
21406348	2219.36	910.726	1.28542	2.24e-12		21403333	52.4243	23.8294	1.13927	0.00376863		21395050	905.139	397.503	1.18683	6.66e-26
21384339	104.938	43.105	1.28705	0.000910426		21401116	143.738	65.1923	1.14056	5.56113e-06		21389156	185.614	81.5587	1.18704	1.74e-07
21384815	108.513	44.4083	1.28766	2.13e-05		21396434	45.2465	20.4599	1.14178	0.00999074		21409600	288.086	126.49	1.18741	1.54e-10
21394947	1563.48	640.174	1.2878	1.44e-31		21391260	212.93	96.4809	1.14209	2.4084e-05		21392353	51.2857	22.5091	1.18819	0.0028115
21394407	572.215	234.043	1.28889	4.72e-18		21385436	54.0774	24.4889	1.14212	0.00264515		21386284	162.417	71.2881	1.18838	1.11e-06
21388145	99.9252	40.8034	1.28992	0.000202181		21404855	108.754	49.3147	1.14213	0.000140164		21406644	514.372	225.662	1.18857	5.68e-19
21394974	101.189	41.4539	1.29112	0.00373489		21395272	450.187	204.052	1.14221	4.0092e-10		21397622	621.04	272.207	1.19025	2.13e-21
21401068	734.601	300.065	1.29182	6.27e-21		112092871	2725.7	1234.86	1.14234	4.62451e-22		112092660	152.557	66.8036	1.19113	1.61e-07
21395098	49.2115	20.1265	1.29194	0.00460467		21409957	730.11	330.722	1.14257	6.70617e-16		21400203	286.62	125.51	1.19161	1.96e-12
112092779	93.1055	37.9171	1.2935	0.00378422		21408630	40.0778	18.181	1.14336	0.0194247		21408388	1229.13	538.021	1.19171	3.34e-26
112092192	572.398	233.59	1.29384	3.71e-11		novel.306	61.4855	27.8655	1.14383	0.00261111		21407202	597.151	261.357	1.19188	1.98e-19
21402238	196.777	80.3653	1.29398	1.76e-05		21400940	37.0604	16.8048	1.14411	0.0173285		21402451	1256.98	550.064	1.19234	2.95e-29
21405873	632.424	257.62	1.29469	4.58e-14		112094986	25.2729	11.4325	1.14457	0.0482603		21403954	450.378	197.064	1.19255	3.42e-15
21390470	1746.67	711.587	1.2959	2.66e-32		21392832	613.501	277.457	1.14461	8.01186e-17		21395725	273.223	119.605	1.19271	7.12e-09
21392066	108.369	44.069	1.2961	1.86e-05		21387025	265.571	120.225	1.14468	5.62076e-09		21397882	1524.54	666.563	1.19334	5.24e-30
21404529	1186.72	482.612	1.29834	7.3e-31		21383818	75.8412	34.226	1.1467	0.000427297		21394295	171.537	75.0084	1.19347	1.1e-07
21400633	36.5828	14.8601	1.29957	0.0481805		21399059	933.725	421.464	1.14791	6.60042e-15		21387297	145.81	63.7422	1.19358	1.15e-06
21386384	265.014	107.626	1.29983	1.6e-11		21394335	347.252	156.746	1.14845	3.49618e-11		21409248	333.821	145.372	1.19977	1.98e-13
21410062	103.093	41.9494	1.30073	0.00152994		112090828	34.193	15.4459	1.14851	0.0211651		112090574	47.123	20.5146	1.20105	0.0101716
21408146	2040.36	827.566	1.30155	4.21e-34		21399441	79.5581	35.8701	1.14861	0.00129744		21389500	409.854	177.95	1.20361	2.62e-14
21399363	65.6125	26.5783	1.30157	0.00184142		21404405	1677.53	756.653	1.14893	6.57289e-16		21392830	393.268	170.695	1.20387	1.08e-14
21388698	85.2745	34.5982	1.30361	0.000891011		21406296	1852.19	835.124	1.14895	7.94784e-13		21390881	25.1734	10.9195	1.20528	0.0459763
21396370	163.11	66.103	1.30554	0.000905676		21405769	1534.61	691.787	1.14969	1.26797e-14		21406896	274.791	119.073	1.20552	1.2e-09
21395879	105.919	42.7629	1.3093	1.31e-05		21406647	296.96	133.886	1.15028	3.8037e-09		112093328	87.3448	37.8339	1.20707	6.03e-05
21402598	1793.15	720.823	1.31435	4.64e-24		21389422	805.609	362.752	1.15049	1.61605e-10		21404307	85.7422	37.1055	1.20765	0.000161234
21387540	53.8716	21.6998	1.31452	0.00498553		21394810	3044.7	1370.8	1.1512	2.89489e-26		21401643	1670.5	722.753	1.20885	6.56e-28
novel.1007	572.187	229.93	1.3147	8.86e-16		21393998	304.729	137.279	1.15137	1.78221e-09		21403105	978.385	423.214	1.20944	3.12e-24
21394900	66.2894	26.5451	1.31641	0.00785512		21400781	1487.59	669.299	1.15233	1.65082e-13		21387005	1291.7	558.359	1.21014	5.41e-31
112095313	48.5034	19.436	1.31816	0.00418821		21396546	3419.54	1537.8	1.15305	1.99173e-15		21406971	1143.12	493.736	1.21097	1.5e-32
21388495	444.866	177.916	1.32121	5.3e-14		21406339	464.656	208.693	1.15378	5.26522e-06		21398109	6074.53	2620.32	1.21303	6.14e-49
21386960	65.7233	26.2791	1.32312	0.00165477		21386204	271.317	121.742	1.15562	2.13614e-08		21406128	1030.74	444.364	1.21395	6.83e-24
21407314	234.506	93.5829	1.32652	2.98e-10		21390947	63.6438	28.5653	1.15574	0.00159293		21391382	426.005	182.581	1.22223	0.00139019
21385847	437.187	174.013	1.32807	1.83e-14		21385072	1392.72	624.718	1.15652	4.68937e-30		21402780	550.24	235.782	1.22243	7.79e-20
novel.1038	67.5936	26.8655	1.32843	0.000949364		21394557	287.389	128.682	1.15938	4.20517e-10		21394901	526.896	225.824	1.22259	1.65e-18
21409053	398.066	158.455	1.33049	6.83e-07		21404214	268.364	120.163	1.15947	4.44086e-08		21405657	268.84	115.144	1.22287	3.15e-08
21392839	258.283	102.707	1.33085	6.45e-12		112092211	39.0027	17.4541	1.15956	0.0115826		21385822	363.785	155.709	1.22391	1.98e-14
21393276	74.3053	29.4623	1.33241	0.000254517		21395489	84.0277	37.6379	1.16049	0.00122443		21392046	331.476	141.711	1.22557	2.69e-13
112093914	366.391	145.382	1.33338	2.35e-16		21395988	44.861	20.0629	1.16092	0.0215223		21409157	430.737	184.021	1.22676	2.52e-18
21407094	41.0015	16.2573	1.3334	0.0198783		21387053	2063.54	922.578	1.16124	6.28852e-33		112094400	918.441	392.107	1.22798	4.75e-30
21407160	344.32	136.508	1.33421	1.99e-12		21406124	1304.52	583.197	1.16188	1.67697e-14		novel.433	31.9072	13.5824	1.22996	0.0243891
21391372	1560.65	616.966	1.33894	1.67e-38		21400416	143.368	64.0875	1.16205	7.56775e-06		21409868	625.356	266.464	1.2306	1.39e-20
21395816	760.124	300.593	1.3394	1.16e-08		21394175	90.1743	40.2849	1.16206	0.000191781		21402647	2471.83	1052.05	1.23227	5.38e-52
21391129	441.352	174.317	1.34106	9.92e-16		112092500	293.644	131.114	1.16224	3.31111e-07		21387666	117.767	50.0748	1.23319	1.13e-05
21392509	142.825	56.2962	1.3416	2.25e-06		112093553	114.168	50.9646	1.16234	2.3704e-05		21407470	179.553	76.3556	1.23362	5.08e-09
112093650	48.288	19.0623	1.34167	0.00629144		21384935	335.922	149.989	1.16311	1.45751e-10		21386355	230.456	97.9246	1.23526	2.8e-09
21404325	87.1799	34.3225	1.34237	0.00172303		21401485	40.5829	18.1353	1.16469	0.0193854		21412472	106527	45237.6	1.23562	4.99e-10
21399709	159.505	62.8877	1.3445	3.88e-08		21401028	6414.83	2859.59	1.16562	5.70477e-13		21392253	90.0158	38.1506	1.2378	5.24e-05
21384187	97.8152	38.5687	1.34525	4.63e-05		21410011	590.097	263.007	1.16611	5.00437e-16		21395913	954.674	404.825	1.23789	9.5e-29
21402370	299.503	117.704	1.34588	3.25e-08		21397113	142.256	63.3968	1.1665	2.55297e-05		21397725	306.609	129.905	1.23906	3.9e-14
21401949	56.8396	22.3904	1.34674	0.00147299		21408762	1008.38	449.306	1.1667	3.50203e-11		21394335	375.89	159.184	1.2396	3.46e-16
112092949	421.634	165.747	1.34855	2.11e-11		21401284	648.178	288.747	1.16703	4.89126e-16		21407014	381.748	161.575	1.24038	1.54e-16
21402231	1113.75	437.109	1.34909	7.64e-25		21397858	582.622	259.469	1.16749	6.1597e-17		21404930	925.861	391.851	1.24061	8.81e-27
21400376	1825.15	716.67	1.34915	7.85e-29		21394683	451.451	201.059	1.16768	2.9833e-13		21400795	1483.78	627.891	1.2407	2.98e-31
21395316	66.0418	25.9541	1.34963	0.000710077		21403207	184.619	82.2464	1.16809	3.65482e-06		21393216	114.462	48.4474	1.24087	2.72e-06
21386413	717.056	280.734	1.35208	4.27e-16		21407810	365.247	162.504	1.16811	1.21086e-13		21387216	25.7686	10.8963	1.2414	0.0399617
21391614	247.208	96.5247	1.35542	7.27e-10		21396526	49.7434	22.1241	1.16835	0.010993		21386205	140.22	59.3012	1.24149	2.33e-07
21388107	81.366	31.7657	1.35719	5.02e-05		21407329	519.823	231.26	1.1685	2.93089e-16		21395287	236.383	99.9147	1.24247	2.34e-10
21405732	138.551	54.0467	1.35888	3.89e-07		21403933	2567.57	1141.76	1.16934	2.03107e-22		21388602	171.814	72.5895	1.2429	9.96e-09
21403555	33.2477	12.9785	1.35898	0.0181285		21385759	1579.68	702.085	1.17012	1.19528e-26		21384840	401.339	169.178	1.24573	1.17e-12
21393410	1112.72	433.509	1.35932	4.88e-26		21408974	242.284	107.706	1.17018	7.61308e-07		21410283	438.224	184.737	1.24608	2.77e-18
21384898	1215.84	473.855	1.35963	8.37e-26		21398425	208.541	92.6372	1.17063	1.34496e-08		112093300	41.287	17.3818	1.24782	0.00546349
21395539	1281.06	498.955	1.35976	9.12e-25		21396623	575.991	255.715	1.17144	1.10263e-12		21390510	141.791	59.7252	1.24813	5.94e-07
112093684	858.309	334.049	1.36117	1.98e-20		21385714	185.53	82.2689	1.17227	1.21198e-06		novel.842	79.2982	33.3611	1.24834	0.000111448
21411531	635.255	247.228	1.36183	0.0264967		21408619	31.0839	13.8125	1.17239	0.0320834		21385201	370.898	156.013	1.24892	1.43e-14
21390555	6072.94	2361.72	1.36247	4.34e-44		21409317	128.718	57.0726	1.17271	0.00329187		21412718	98.9384	41.6443	1.24918	0.000111501
21384311	31.7722	12.3211	1.36599	0.0187497		21395722	590.141	261.619	1.17361	5.15657e-12		21408408	165.427	69.5965	1.24953	7.57e-09
21392371	75.9713	29.4755	1.36694	9.33e-05		21389353	433.871	192.245	1.17483	4.62683e-10		21407304	96.4134	40.5148	1.25002	3.14e-05
21395693	60.3462	23.4059	1.36992	0.016752		21402539	1202.62	532.82	1.1749	2.21345e-12		21403287	189.311	79.5279	1.25174	1.54e-07
21400456	64.3918	24.9477	1.37188	0.0427187		21408894	345.934	153.111	1.17519	3.16478e-12		112092211	42.2354	17.7255	1.2526	0.00453191
21384636	201.313	77.7971	1.37377	3.43e-09		21389162	791.379	350.287	1.17609	3.11217e-22		21385762	1156.22	484.554	1.25499	2.83e-27
21399277	556.56	214.262	1.37579	7.25e-14		21391382	406.376	179.773	1.17693	8.33483e-09		21386949	155.369	65.0624	1.25547	2.17e-07
novel.143	32.1075	12.352	1.37905	0.0217755		21403620	585.507	259.069	1.17714	8.27008e-15		21399738	1231.32	515.31	1.25647	4.35e-26
21400401	328.062	126.011	1.37927	2.75e-08		21401023	76.7866	33.9478	1.17755	0.000402035		21405102	238.539	99.8133	1.25659	2.16e-11
21399225	97.6935	37.6081	1.38079	0.00529992		21394132	610.642	269.375	1.18073	1.58913e-11		21403155	208.664	87.2525	1.25773	1.08e-09
21386834	978.871	375.889	1.38136	2.75e-31		21403391	148.756	65.5216	1.18361	2.29854e-05		21406647	325.356	135.968	1.25851	1.69e-15
21402427	239.14	91.8174	1.38144	2.9e-09		21388823	3269.71	1439.51	1.18363	3.61082e-34		21409103	294.91	123.233	1.25959	4.7e-11
21396404	324.901	124.618	1.38386	1.93e-06		112090714	2514.7	1107.06	1.18391	2.24236e-25		21395687	157.416	65.702	1.25969	1.38e-07
21407088	119.791	45.9346	1.38533	0.000125245		21387355	26.0025	11.442	1.18402	0.0478845		21384912	75.1408	31.3858	1.25981	0.000497095
21401695	104.971	40.2433	1.38678	0.00141835		21392806	141.148	62.0927	1.18455	3.45831e-06		21391489	103.832	43.296	1.26193	3.29e-06
21395007	156.826	60.0334	1.3881	4.29e-06		21410045	702.46	309.1	1.18469	7.33008e-17		21406851	39.3295	16.3926	1.2637	0.00902099
21407351	1705.97	650.126	1.39183	2.64e-40		21396063	495.694	218.08	1.18476	6.00591e-13		21392149	899.547	374.352	1.26485	1.34e-29
21397451	286.738	109.187	1.39369	4.58e-13		21389370	364.849	160.54	1.18497	4.78866e-13		21405137	3579.04	1488.65	1.26559	5.06e-38
21398466	53.5157	20.3467	1.39481	0.00298528		21403495	7412.54	3256.34	1.18679	6.6482e-29		21399528	657.209	273.13	1.26685	7.66e-26
21401611	1124.81	426.367	1.39903	2.97e-18		21400758	1613.38	708.671	1.18726	1.37107e-15		21400626	606.657	252.082	1.26721	1.51e-22
21411560	73.6743	27.9119	1.39946	0.000274171		21410437	488.499	214.603	1.18753	1.49237e-12		21393395	2362.75	980.163	1.26942	1.34e-43
21385981	346.086	131.181	1.40059	5.93e-11		21397289	124.631	54.6888	1.18753	5.02512e-06		21407713	255.146	105.774	1.27065	1.2e-09
21395587	1107.12	418.568	1.40266	6.75e-23		21401436	211.975	92.9052	1.18847	2.14918e-06		21397576	58.3987	24.1971	1.27077	0.00240536
21384952	75.5025	28.5538	1.40272	0.00034684		21386776	936.913	411.051	1.18865	8.27654e-11		21408338	572.098	236.94	1.27229	7.65e-18
21401265	65.1702	24.6743	1.40304	0.000778729		21385899	599.316	263.002	1.18893	4.48655e-13		21390693	281.072	116.254	1.27375	3.33e-10
21408908	3206.48	1212.01	1.40368	0.000152178		21400483	955.649	419.138	1.18929	2.52471e-12		21404364	111.336	46.0414	1.27391	3.07e-05
21408147	164.721	62.1359	1.40459	8.85e-08		21394304	312.482	136.83	1.19023	9.56993e-09		21400856	51.9585	21.4845	1.27399	0.00241141
21407673	6622.41	2501.32	1.40473	4.1e-43		21388615	637.154	279.286	1.19042	1.9395e-11		21399679	459.638	189.933	1.27504	5.32e-17
21405914	465.248	175.469	1.40545	3.16e-14		21396444	240.423	105.33	1.19056	1.39702e-09		21400171	80.2057	33.0911	1.27783	0.00069777
112095280	78.0244	29.4274	1.40661	0.0121952		21400945	540.619	236.793	1.19177	1.44024e-15		112091553	303.74	125.212	1.2789	3.6e-14
21394251	248.821	93.9759	1.40672	2.04e-07		21400275	3710.3	1624.4	1.19181	3.56573e-17		21392795	486.012	200.161	1.2799	2.16e-19
21402971	62.6914	23.6433	1.40798	0.000414539		21395085	57.6049	25.1839	1.19236	0.00426933		21385464	318.956	131.351	1.2803	5.32e-15
21409302	93.578	35.3076	1.40849	0.000176387		21394173	97.4772	42.6835	1.19236	4.88813e-05		21409470	3271.87	1345.63	1.28196	1.12e-42
21397057	662.479	249.543	1.40937	1.71e-24		21409600	284.624	124.555	1.19274	1.59611e-06		21396372	3090.21	1270.7	1.2821	2.14e-47
21392659	61.998	23.3344	1.40971	0.000426636		21390781	98.2472	43.0427	1.19313	0.000214363		21396702	251.44	103.38	1.28271	1.7e-10
112093169	39.7189	14.9643	1.41266	0.0202696		21389813	458.349	200.443	1.19317	5.05207e-17		21394875	587.245	241.317	1.28291	9.24e-24
21394576	265.6	99.7348	1.41303	1.07e-11		21405194	661.539	289.247	1.19317	4.60769e-17		21385544	122.865	50.5181	1.28293	6.2e-07
21408649	2379.95	890.984	1.41709	1.41e-42		21405365	40.7031	17.7787	1.19361	0.00702119		21398447	101.272	41.6214	1.28317	2.16e-05
21398757	3562.19	1333.73	1.41737	8.8e-05		21383690	1014.8	443.591	1.19431	7.1349e-25		21398156	37.3532	15.3519	1.28361	0.0127802
21388088	84.7864	31.693	1.41739	3.95e-05		21398415	827.289	361.378	1.19479	4.28228e-15		112094192	3753.17	1541.65	1.28366	3.24e-53
21408189	82.4546	30.7822	1.41928	0.00016402		21406422	100.609	43.8607	1.19483	0.00140846		21384531	46.4922	19.0751	1.28459	0.011533
21388445	471.119	176.218	1.42002	4.27e-15		21394396	19791.1	8639.78	1.19579	1.49101e-26		21397253	40.6516	16.6661	1.28488	0.00800222
21402213	47.6984	17.8518	1.42074	0.00276526		112090794	32.3046	14.1215	1.19603	0.0183518		112094665	34.8242	14.2669	1.28557	0.0252814
21402530	35.4577	13.2433	1.42127	0.0198084		21408653	395.122	172.461	1.1962	2.39932e-11		21402812	37.403	15.3147	1.28716	0.00767031
21411075	50.324	18.7568	1.42494	0.00273183		21396473	119.314	52.0543	1.19736	1.1884e-05		21386219	219.616	89.8135	1.28892	2.04e-09
21385449	115.169	42.7766	1.43111	1.67e-06		novel.952	26.9644	11.7398	1.19755	0.0302263		21390807	38.3482	15.6712	1.29081	0.00626233
21395150	165.035	61.236	1.43265	1.45e-07		21396353	77.9579	33.8993	1.19928	0.0015669		21399981	483.801	197.646	1.29126	1.51e-17
21388900	83.4626	30.8108	1.43595	8.79e-05		21393487	85.5986	37.296	1.19976	0.000130898		21393778	1282.42	523.032	1.29395	1.5e-43
21391946	262.227	96.963	1.43632	4.07e-13		21397563	1455.07	633.562	1.19988	1.02754e-24		112094561	66.0275	26.9207	1.29442	0.000989635
21393936	92.7884	34.3373	1.43639	2.63e-05		21399360	298.408	129.907	1.20086	2.35944e-08		21387367	30.9713	12.6339	1.29447	0.0152393
21404302	32.3082	11.983	1.43733	0.0456623		21399017	107.998	47.0288	1.20104	0.000367678		21409689	523.165	213.204	1.2947	5.35e-17
21403583	53.7775	19.7449	1.44332	0.00179495		21394428	251.479	109.334	1.20188	1.68535e-09		21393106	124.714	50.8366	1.29528	2.68e-06
21407509	65.3079	24.0765	1.44395	0.00593391		21404032	104.982	45.6737	1.20227	2.23499e-05		21403162	4353.39	1773.46	1.2956	1.23e-52
21395995	1822.08	668.793	1.44605	0.0203864		21401187	118.109	51.3831	1.20241	0.000977617		21401126	350.092	142.481	1.29696	6.87e-16
21390585	664.137	243.763	1.44691	6.66e-13		21384487	582.629	253.048	1.20321	1.20201e-14		21402014	39.3784	16.0063	1.29787	0.00892919
21407847	89.2464	32.7371	1.44693	7.24e-06		21403526	441.064	191.511	1.20376	6.38727e-12		21405851	846.513	343.985	1.29925	1.47e-30
112091539	28.2695	10.3582	1.44782	0.0276376		21407901	863.421	374.867	1.20386	2.88451e-23		21407869	619.894	251.82	1.29937	4.64e-23
112090411	39.8652	14.585	1.45056	0.00341957		21399143	131.545	57.0447	1.20649	3.79882e-05		21385294	286.57	116.244	1.30178	2.74e-14
novel.663	31.8171	11.6809	1.45253	0.0331268		21403190	122.467	53.0969	1.20751	3.46927e-05		21394454	3858.09	1564.67	1.3021	1.48e-61
21401193	666.687	243.093	1.45455	9.72e-23		21410592	48.9925	21.1744	1.20839	0.0194933		21406810	1289.91	523.105	1.30232	1.12e-28
21410339	54.449	19.8611	1.45468	0.00673101		21406474	1262.29	545.112	1.21136	1.29533e-14		21390554	150.658	61.0136	1.30384	3.84e-08
21404536	125.2	45.7362	1.45599	2.61e-06		21399584	269.112	116.13	1.21181	1.23207e-07		21403996	901.185	364.791	1.30479	2.12e-35
112093214	92.4244	33.7029	1.45841	0.00157453		21401363	47.3648	20.4657	1.21287	0.00908482		21390556	1133.81	458.638	1.30599	2.94e-26
21403306	53.4879	19.4749	1.46038	0.000812453		21411075	45.0684	19.4317	1.21339	0.00576184		21392442	97.028	39.2065	1.30742	1.53e-05
21408651	94.4559	34.3413	1.46279	2.77e-05		21390080	645.896	278.459	1.21351	5.33324e-16		21409641	550.586	222.192	1.30905	9e-22
novel.804	34.8058	12.6358	1.46413	0.00750355		21394486	373.662	161.072	1.21366	5.32219e-12		21391680	643.798	259.261	1.31185	8.56e-24
21386247	43.1074	15.6171	1.46571	0.00774722		21393617	299.21	128.89	1.21571	3.02605e-10		112091851	29.6712	11.9628	1.3121	0.0162749
112092685	418.709	151.061	1.46985	6.08e-12		21384610	479.261	206.336	1.21576	1.09096e-13		21383827	243.197	97.9679	1.31235	1.98e-07
21407985	191.393	69.1787	1.47012	3.79e-07		21391072	3236.74	1392.97	1.21658	3.29285e-18		21405053	1092.61	438.734	1.31665	1.51e-27
21388894	34.9325	12.6478	1.47131	0.0238806		21404259	64.0123	27.5609	1.21727	0.000833191		21400186	3397.91	1363.89	1.3169	1.65e-38
novel.743	318.676	114.696	1.47331	1.27e-12		21387168	197.827	85.0565	1.21793	7.01936e-06		21398626	72.2346	28.9331	1.31896	8.34e-05
21399165	113.638	40.8412	1.47519	1.67e-06		21395435	299.896	128.858	1.21884	1.53861e-06		21402449	409.24	163.947	1.31958	8.84e-20
21393743	83.7283	30.1832	1.47542	0.000227888		21409103	282.445	121.339	1.2193	1.48875e-09		21403001	30.6161	12.2634	1.31962	0.0150929
21406465	655.499	235.474	1.47613	8.43e-25		21385688	62.5138	26.894	1.21933	0.00153697		21397140	147.4	59.0416	1.32049	3.86e-08
112092562	284.251	102.061	1.47713	2.93e-15		112092473	654.733	280.937	1.22016	2.13034e-16		112095007	33.2277	13.2738	1.32262	0.0110249
21399378	99.1748	35.7082	1.47732	0.00156843		21389460	25.9157	11.0865	1.22103	0.048993		21409203	277.905	111.058	1.32296	4.86e-12
21383685	92.6954	33.3578	1.47771	0.000167257		21385058	4889.14	2096.16	1.22194	1.80893e-15		21394384	172.783	68.9572	1.32601	9.49e-09
novel.432	50.6138	18.1235	1.478	0.00193888		21401594	71.1697	30.4771	1.22313	0.00126027		21399291	312.009	124.273	1.32752	1.03e-13
21383813	332.854	119.563	1.47823	1.35e-14		21403267	1366.32	585.132	1.22364	1.37071e-25		novel.784	39.3436	15.6674	1.32774	0.00513077
21407269	86.733	31.078	1.47927	1.1e-05		21391754	515.532	220.849	1.22379	2.15261e-14		112090328	561.375	223.561	1.32814	9.96e-23
21397444	866.986	310.771	1.47977	5.44e-19		21391507	223.234	95.4877	1.22386	6.81976e-05		21410337	6545.6	2602.73	1.33051	6.77e-42
21387034	255.551	91.6136	1.48051	0.0290315		21391224	627.229	268.335	1.22402	2.56637e-10		21393732	1022.04	406.437	1.33066	1.47e-28
21390924	733.199	262.637	1.48052	8.55e-24		21387046	1116.35	477.704	1.22415	5.07153e-08		21390439	40.2942	16.0158	1.33088	0.0042707
21391999	63.3843	22.7239	1.48079	0.000191051		21386967	2311.4	988.91	1.22475	3.64872e-17		21403101	140.612	55.8774	1.33098	3.1e-08
112092786	26.293	9.41305	1.48212	0.0210071		21389488	333.41	142.608	1.22475	3.30562e-12		21396636	145.017	57.5561	1.33277	7.21e-08
112092669	335.088	119.646	1.48411	8.52e-08		21394023	1547.8	661.741	1.22585	4.18237e-23		21399478	51.5781	20.478	1.3335	0.000976243
21395362	150.315	53.7853	1.4853	0.000252607		21400911	1437.78	614.522	1.22653	1.32359e-24		21406008	3584.4	1421.17	1.33471	6.2e-61
21393491	31.6618	11.3285	1.48656	0.0428913		21399598	117.661	50.2971	1.22662	7.99159e-05		21394594	176.051	69.5864	1.33949	2.98e-10
21396664	55.2468	19.7157	1.48909	0.00277589		21393163	257.819	110	1.22822	1.08789e-10		21387479	120.959	47.8117	1.33991	3.83e-06
21398113	197.124	70.308	1.4898	8.78e-07		21386859	43.2094	18.4735	1.2285	0.00901871		21398677	34.513	13.6124	1.34108	0.0126926
21390665	1150.84	409.282	1.49184	4.02e-40		21384840	391.196	166.591	1.23087	2.4898e-05		21398309	409.433	161.62	1.34116	3.66e-18
novel.59	31.0774	11.0207	1.49493	0.0102275		21389913	78.669	33.5101	1.23115	0.000299131		21389830	45.8426	18.0913	1.34177	0.00518334
21402350	2977.68	1056.33	1.49521	0.00188725		21389815	1515.44	645.251	1.23176	5.41923e-20		21393351	144.534	57.02	1.34242	7.33e-06
21390569	563.635	199.459	1.49761	2.11e-14		21399191	1271.13	541.342	1.23176	4.0014e-21		21409781	648.858	255.785	1.34312	8.08e-25
21390804	139.857	49.6043	1.49842	1.69e-05		21408163	240.304	102.351	1.23179	1.72944e-08		21393078	275.972	108.774	1.34333	3.26e-12
21386912	97.1051	34.3476	1.50011	3.53e-06		21386079	327.102	139.288	1.23208	1.54342e-12		21411244	25.1565	9.91712	1.34487	0.0253753
21401422	128.23	45.3265	1.5019	1.34e-06		21390299	562.993	239.761	1.23244	1.03116e-11		21398929	313.686	123.519	1.34512	1.97e-15
21407761	185.346	65.4073	1.50261	2.46e-11		21406851	37.8881	16.1412	1.23252	0.0218627		21392137	656.666	258.474	1.34531	3.41e-27
21400465	751.553	265.012	1.50299	1.04e-23		21404120	571.932	243.226	1.23307	9.35763e-13		novel.846	27.7279	10.9141	1.34548	0.0150436
21397948	82.8367	29.2037	1.50457	2.43e-05		21400020	285.01	121.191	1.23309	1.77129e-10		21387901	393.578	154.608	1.34866	1.18e-16
21404629	150.826	53.1771	1.50533	1.53e-07		21403925	1601.9	681	1.23387	8.46644e-28		21412056	167.651	65.7746	1.34971	1.12e-09
21407811	243.642	85.8267	1.50676	2.89e-09		112093169	36.4286	15.4965	1.23417	0.0311745		21394544	477.251	187.169	1.35041	5.64e-21
112095296	80.055	28.2248	1.50835	0.00717272		21404188	60.946	25.896	1.23717	0.00155426		21410855	244.261	95.7998	1.3505	2.17e-11
21392106	234.341	82.3145	1.50837	6.13e-12		21406163	431.807	183.214	1.23754	3.17042e-12		21390646	176.399	69.1143	1.35101	2.27e-09
21407147	101.444	35.6978	1.50873	9.12e-05		novel.804	30.9173	13.0893	1.23829	0.0177205		21385564	10349.3	4055.18	1.35169	8.27e-62
21408287	25.754	9.03714	1.5099	0.0279945		21396221	166.21	70.4798	1.23865	2.83006e-06		21391983	365.405	142.737	1.35575	4.81e-15
21390705	305.645	107.215	1.51127	4e-15		21396143	124.553	52.825	1.2389	2.18743e-05		21392267	494.883	193.339	1.35611	7.66e-24
21397963	20.3919	7.124	1.51743	0.038009		21390074	109.186	46.288	1.23957	5.92376e-05		21389034	254.995	99.6084	1.35653	2.46e-12
21409683	576.65	201.379	1.5177	1.6e-26		21403881	22.985	9.71977	1.23968	0.042274		21389623	3438.05	1342.37	1.35681	1.16e-54
21397155	115.151	40.1248	1.51914	1.86e-07		112095080	52.2767	22.096	1.24018	0.00952061		21395589	129.303	50.4922	1.35708	6.56e-08
112091471	21.3666	7.43465	1.5227	0.0366903		21385638	518.221	219.463	1.24026	1.58825e-14		21401894	1061.19	414.025	1.35809	2.1e-35
21385011	264.015	91.4877	1.527	6.14e-08		21410262	180.092	76.2762	1.24039	5.05775e-08		21396247	1771.11	690.52	1.35868	3.5e-44
21402007	28.0554	9.70824	1.52867	0.0150408		21392615	683.095	289.054	1.24118	3.58444e-19		21386552	33.2078	12.9366	1.3592	0.00854657
21402514	115.021	39.7678	1.5333	1.74e-06		21406686	1026.49	434.103	1.24153	2.30865e-14		112091618	69.9537	27.257	1.35948	6.56e-05
112092202	59.8911	20.7164	1.53527	0.00404491		21390550	45.1283	19.1064	1.24168	0.00682754		21407591	674.584	262.746	1.36013	3.35e-31
21405020	219.426	75.4519	1.54074	7.69e-12		21392802	30.2456	12.7425	1.24513	0.023459		21410031	557.808	217.207	1.36141	8.88e-19
21402155	311.726	107.135	1.54171	1.17e-13		112090815	65.2938	27.475	1.24613	0.00214561		21388441	111.214	43.247	1.36205	6.39e-07
21394709	66.073	22.7131	1.54267	0.000147049		21408401	288.16	121.485	1.2462	4.2403e-10		21403552	995.24	386.943	1.3629	4.52e-36
21390127	22.656	7.74531	1.54395	0.0422261		21404082	141.628	59.6608	1.2473	8.06683e-06		112090475	273.196	106.024	1.3655	1.93e-10
21409426	609.951	209.01	1.54522	2.68e-28		21394879	298.471	125.628	1.24744	5.36034e-06		112091552	35.1333	13.6208	1.36646	0.00949048
21403601	56.5922	19.4005	1.54614	0.000643173		21389328	77.3715	32.6292	1.24853	0.000609603		21406078	265.769	103.126	1.36648	3.12e-11
21404632	312.172	106.905	1.54737	9.64e-14		21394633	564.611	237.45	1.24868	3.58928e-13		21392355	127.69	49.4081	1.36953	1.26e-07
21397448	75.8696	25.9329	1.54785	1.49e-05		21397228	226.984	95.4908	1.25065	4.58369e-08		21387699	220.532	85.2053	1.37184	1.37e-12
21393812	64.5852	22.0179	1.54928	0.00476863		21397922	2549.53	1071.22	1.25104	1.28442e-17		21389370	422.074	163.043	1.37254	1.04e-20
21394200	417.099	142.255	1.55075	6e-18		21402778	303.634	127.616	1.25118	2.75091e-12		21395666	343.765	132.663	1.37384	1.87e-18
21389418	32.1323	10.9904	1.55106	0.0121952		112094585	1336.49	560.87	1.25263	5.78119e-14		21400483	1104.6	425.65	1.37541	1.99e-27
21395766	328.096	112.067	1.55121	1.86e-14		21399183	347.18	145.676	1.25301	2.01168e-13		21385097	28.3748	10.9459	1.37635	0.0167779
21403280	1026.13	349.979	1.55147	3.22e-26		112093572	3050.61	1279.86	1.25322	1.7941e-15		21407407	410.064	157.829	1.3775	3.24e-20
21393826	248.224	84.6785	1.55158	1.35e-13		21405637	1163.85	488.129	1.25335	5.10116e-27		21394488	28.3979	10.9281	1.37857	0.018084
21398452	820.151	278.599	1.55734	8.17e-34		21396747	59.0555	24.7962	1.25342	0.00278504		21401320	233.367	89.7775	1.37893	4.56e-11
21406268	73.24	24.8441	1.56149	0.0118086		21389703	178.416	74.9318	1.25356	8.98683e-06		21403466	4052.78	1557.08	1.38007	9.52e-52
112095021	64.2486	21.7639	1.56518	0.00138886		112093907	58.5	24.4831	1.25438	0.00870111		21397781	36.4228	13.9675	1.38243	0.00545787
21401350	71.9284	24.2486	1.56638	0.000391821		21389047	306.61	128.592	1.25477	1.37249e-07		21389484	571.993	219.304	1.3833	6.83e-26
21397402	394.282	133.18	1.56704	2.58e-16		21388188	5275.57	2210.38	1.25509	9.55667e-20		21398041	3416.76	1309	1.38426	3.33e-46
21386885	79.7214	26.8998	1.5673	8.77e-06		21408402	1367.06	572.855	1.2551	9.23083e-25		21398473	72841.1	27894	1.3848	1.57e-79
21389567	36.4969	12.3286	1.56879	0.00424341		21403886	274.113	114.754	1.25625	8.26567e-10		21386851	33.8573	12.9663	1.3853	0.00615324
21408145	596.576	200.819	1.56989	1.51e-26		21386512	2477.31	1036.9	1.25644	5.37405e-31		21397566	926.19	353.506	1.38993	1.18e-33
21405074	56.6419	19.1059	1.57176	0.00295312		21397546	383.718	160.506	1.25736	5.80031e-15		21401644	89.3914	34.0432	1.39177	2.78e-05
21396065	83.8945	28.2237	1.57399	1.66e-05		novel.433	32.0274	13.3786	1.25793	0.0262498		novel.1010	24.1878	9.2056	1.39371	0.02254
21408974	310.525	103.931	1.57761	3.28e-12		21394041	114.023	47.6864	1.25832	6.22758e-05		21399844	245.298	93.3179	1.39388	3.48e-12
21384684	27.0988	9.05432	1.57846	0.0226657		21401880	329.223	137.579	1.25873	2.46508e-14		21396355	28.6829	10.8942	1.3959	0.0123339
novel.728	24.2361	8.10748	1.57958	0.0249209		21395150	151.799	63.4396	1.25976	7.54411e-06		21408911	323.693	122.959	1.39598	3.31e-17
21385016	369.604	123.563	1.57979	1.19e-13		21407996	1969.54	822.477	1.26001	4.17355e-22		21383677	93.4366	35.3815	1.40003	1.41e-05
21397821	188.453	63.1262	1.57996	1.03e-08		21397316	478.393	199.675	1.26037	5.15732e-19		21398320	474.637	179.666	1.40153	9.52e-24
21392364	436.541	145.881	1.58184	0.00112828		21407298	332.079	138.67	1.26074	1.08975e-11		21408130	143.342	54.2313	1.40225	3.91e-06
21397195	24.1432	8.10404	1.58216	0.0423997		21405414	806.935	336.833	1.26087	1.0678e-22		21410717	148.056	56.0185	1.40315	4.15e-08
21407846	66.1428	22.0368	1.58833	5.95e-05		21394429	62.6903	26.163	1.26114	0.00065009		21405397	336.508	127.226	1.40357	1.55e-14
21401540	48.6821	16.1995	1.58949	0.000607837		21403980	132.909	55.3437	1.26237	5.80629e-06		21387999	149.952	56.6355	1.40518	3.18e-09
21395052	194.552	64.3963	1.59281	7.62e-07		21404190	57.937	24.1561	1.26364	0.00120254		novel.952	31.5922	11.9224	1.40544	0.00771388
21399026	470.732	155.923	1.59295	2.65e-20		21407272	37.0579	15.413	1.26402	0.0104237		21405603	41.6313	15.6998	1.40738	0.00273189
21401719	76.5246	25.3591	1.59754	0.000428376		21408380	224.043	93.2898	1.26512	4.08858e-09		21398315	252.15	95.0199	1.40742	1.43e-13
112094414	73.6931	24.2411	1.59981	0.000373518		21399354	171.801	71.51	1.26531	1.59828e-08		21394138	55.1289	20.7715	1.4075	0.000324692
21400283	57.8122	19.0703	1.60193	0.000460231		21390153	57.2828	23.8023	1.26627	0.00102909		21386666	298.011	112.015	1.41092	3.64e-15
21383795	22.6317	7.43522	1.60221	0.0261132		21386355	231.994	96.4215	1.26687	1.80553e-10		novel.646	124.271	46.6717	1.41237	2.28e-05
21397196	22.5574	7.4524	1.60405	0.0484654		21401320	212.631	88.3988	1.26691	3.99388e-07		112092510	146.164	54.8355	1.41371	3e-08
21407851	300.635	98.7989	1.60691	7.56e-07		21408585	34.778	14.4465	1.26723	0.00956718		21393174	181.743	68.1173	1.41546	2.45e-09
21388091	208.36	68.3943	1.60694	3.02e-13		21403325	1175.61	488.339	1.26802	4.55291e-20		21393888	31.9464	11.9872	1.41603	0.0409022
21408953	1557.32	508.477	1.61528	9.24e-28		112090557	576.674	239.23	1.26899	8.89301e-20		21391533	872.758	326.924	1.41625	1.14e-28
novel.355	21.9486	7.14518	1.61842	0.0269658		21400023	309.293	128.215	1.27042	4.32275e-12		21407924	1208.46	452.581	1.41704	5.47e-37
21401583	187.343	60.9293	1.61952	3.2e-12		21403641	547.543	226.978	1.27079	2.35031e-16		21406163	497.123	186.066	1.41762	3.31e-25
21411085	253.636	82.4548	1.62289	4.53e-12		21397683	60.8617	25.2726	1.27104	0.0041049		21390101	104.834	39.2297	1.41838	8.2e-07
21394412	64.7056	21.0602	1.62302	0.018404		21396753	34.9201	14.4527	1.27178	0.0250295		21389358	866.552	324.2	1.41844	8.98e-36
21396368	81.7952	26.5748	1.62573	0.000176442		21398706	77.0718	31.9186	1.2718	0.000233082		21392769	654.222	244.523	1.4194	1.83e-19
112093403	25.0731	8.10117	1.62741	0.0176048		21392816	93.1388	38.5113	1.27249	0.000130252		21388711	313.675	117.217	1.41987	3.45e-17
112092312	61.9526	20.1248	1.62743	0.0107441		21400963	75.53	31.2398	1.27309	0.000137935		21387360	187.055	69.8873	1.42031	1.26e-11
21409311	232.235	75.1905	1.62785	2.35e-15		21407467	77.7774	32.1614	1.27348	0.000272228		21388612	278.948	104.122	1.42244	2.15e-14
21400038	191.377	62.0233	1.62851	4.93e-08		21388650	341.784	141.364	1.27382	2.27823e-13		21406103	40.2798	15.048	1.42255	0.00450937
21405427	97.1136	31.4092	1.62886	3.71e-07		21408757	1842.66	761.447	1.27476	7.72121e-21		21407253	4101.85	1529.53	1.42324	1.6e-58
21407200	57.205	18.4691	1.63378	0.0163683		21389770	35.7977	14.7613	1.27664	0.00902842		21404816	67.7076	25.2268	1.42437	6.67e-05
112092006	156.89	50.6341	1.63432	7.15e-07		21390031	405.682	167.453	1.27715	5.17861e-15		21385652	217.96	81.0602	1.42649	8e-12
21404394	475.042	151.655	1.64727	2.33e-27		21407036	417.366	172.054	1.27735	5.22776e-14		21388145	115.466	42.9363	1.42685	1.45e-07
21407167	605.311	193.06	1.64872	8.27e-24		21394902	1384.13	570.174	1.27959	1.69414e-22		21399172	1808.16	671.686	1.42887	1.66e-53
21407957	1307.24	416.605	1.64996	2.27e-39		112091553	299.384	123.287	1.27994	1.146e-12		21399328	265.421	98.6069	1.42898	3.53e-15
21389916	111.726	35.5169	1.65213	8.48e-07		21407993	72.4481	29.8011	1.2804	0.00396009		21388880	2213.74	822.005	1.42917	1.22e-53
21399449	277.516	88.1593	1.65288	2.77e-10		21390984	678.908	279.261	1.28099	1.55502e-06		21401212	90.9199	33.7351	1.43011	5.33e-06
21399911	198.343	62.9747	1.65441	1.29e-08		21391369	840.151	345.765	1.28127	3.17135e-21		21404844	43.1252	16.001	1.43014	0.0117044
21388974	41.8355	13.2972	1.65456	0.000867561		21412377	84.8939	34.8912	1.28208	3.87951e-05		112094947	24.8365	9.21422	1.43113	0.0172181
112090745	276.293	87.3708	1.65943	2.05e-13		21394808	675.287	277.484	1.28359	1.15858e-20		21406035	271.703	100.526	1.43411	2.56e-12
21399104	64.4206	20.3988	1.66126	4.49e-05		21404578	1037.05	425.879	1.28378	2.28105e-14		21396221	193.432	71.578	1.43418	1.07e-11
21404462	32.7142	10.3765	1.66316	0.0182811		21404165	4799.4	1970.42	1.28422	1.33981e-42		21387903	135.693	50.1723	1.43614	1.05e-07
21394208	247.481	78.1942	1.66419	2.53e-08		21411199	4104.76	1685.27	1.28448	3.16372e-32		21384013	120.887	44.6549	1.43679	5.01e-08
21384388	29.8755	9.4039	1.66602	0.0138101		21405703	31.0843	12.7622	1.28483	0.0162393		21390173	48.0237	17.7309	1.43775	0.000708781
21402699	93.5803	29.499	1.66686	1.37e-06		21387866	122.698	50.3137	1.28503	1.17436e-06		21410467	369.22	136.226	1.4387	0.00999423
novel.168	59.7882	18.7906	1.67034	0.00032251		21401113	669.077	274.552	1.28517	1.15743e-19		112093823	471.028	173.683	1.43987	5.28e-23
21396190	168.303	52.8007	1.6721	5.4e-12		112090461	25.3881	10.3887	1.28581	0.0325365		21400606	2379.86	875.241	1.44305	3.11e-70
novel.1006	24.6358	7.74645	1.67256	0.0271271		21391993	165.457	67.7303	1.28661	9.38963e-07		21398118	460.484	169.141	1.44508	3.8e-25
21397242	1120.9	351.486	1.67332	0.000608752		21392836	300.155	122.958	1.28847	1.34208e-09		21387111	226.627	83.0912	1.44705	3.03e-11
21404667	150.7	47.2855	1.67456	8.49e-09		21398109	6304.75	2580.1	1.28899	2.11485e-41		21390231	424.674	155.701	1.44722	1.73e-23
21383997	33.0837	10.3198	1.67559	0.013053		21391941	49.2228	20.1628	1.28974	0.00185653		21408616	542.236	198.846	1.44741	5.82e-23
21404515	53.7338	16.795	1.67778	0.000822962		21388722	230.238	94.0344	1.29132	8.75912e-10		21406004	42.8777	15.7414	1.44791	0.0033541
21393217	32.3596	10.1225	1.68029	0.0190475		21385295	682.13	278.425	1.29242	9.56452e-19		21403391	181.502	66.5556	1.44799	2.56e-09
21406221	321.184	100.128	1.68289	6.16e-08		112093644	176.259	71.803	1.29417	2.733e-08		21393936	98.6699	36.1373	1.44913	3.63e-07
21397543	325.88	101.108	1.68708	7.69e-11		21403477	571.357	233.1	1.29418	5.38079e-18		novel.193	24.183	8.8491	1.44932	0.0208934
21388901	346.834	107.551	1.68799	1.15e-11		21386608	255.28	104.105	1.29428	1.68873e-08		novel.662	124.838	45.7193	1.44955	1.34e-07
21391993	211.257	65.3666	1.69072	2.56e-13		21408447	139.992	56.947	1.29689	3.53095e-06		21397917	34.4785	12.6312	1.4498	0.00536808
21407577	19.916	6.13366	1.69489	0.0472947		21389358	785.424	319.221	1.29896	3.74092e-20		21390992	40292.7	14744.7	1.45031	2.56e-68
21391183	24.0926	7.44725	1.69775	0.0255215		21385236	47.1194	19.1902	1.29917	0.00897611		21389155	27.1037	9.89988	1.45368	0.0137223
21387754	130.868	40.225	1.70484	9.62e-09		21394295	181.61	73.8647	1.29919	5.59802e-07		21386765	568.795	207.533	1.45435	1.32e-30
112091567	249.155	75.981	1.71095	1.98e-09		21394897	30.5967	12.4109	1.29967	0.0159544		21393730	556.406	202.88	1.45565	5.35e-25
21388489	246.677	75.1951	1.71235	1.31e-10		21397651	67.7627	27.5626	1.29999	0.000442725		21390193	2535.35	924.164	1.45595	4.94e-72
21403666	62.8128	19.1516	1.71401	3.04e-05		21396248	67.8285	27.5375	1.30205	0.000221286		112094302	22.565	8.19732	1.46222	0.0231203
21384682	114.908	34.9518	1.71431	5.39e-07		21406410	496.264	201.008	1.3038	2.44596e-09		21386589	133.629	48.2887	1.46718	3.02e-06
21403080	55.1096	16.7635	1.71712	0.00095692		21383887	316.409	128.094	1.3045	4.65027e-10		21389828	27.408	9.90048	1.47	0.010144
21392317	108.706	33.0295	1.71884	2.14e-08		21388900	78.9429	31.9199	1.30496	0.00148853		21389907	452.788	163.223	1.4717	2.8e-24
21389525	237.67	71.8836	1.72585	9.01e-16		21396974	115.593	46.7125	1.30585	7.39022e-05		21408402	1615.46	581.774	1.47335	2.97e-49
21406219	555.164	167.861	1.72628	1.37e-32		21387150	113.066	45.6778	1.3076	8.2724e-07		21395085	71.2598	25.5729	1.47858	8.28e-05
21412242	58.8922	17.8043	1.72825	0.00012458		21412306	152.9	61.7767	1.30879	5.00929e-08		21407807	56.1177	20.1509	1.47874	0.000209404
21394175	128.995	38.892	1.73187	9.19e-09		112093959	171.595	69.1571	1.30998	1.27253e-08		novel.591	19.9768	7.17655	1.47876	0.0377499
21385786	175.815	52.8116	1.73393	1.68e-12		21394138	50.7438	20.4558	1.31011	0.00118071		21408796	24.7722	8.8916	1.48044	0.0374845
112090409	164.029	49.3795	1.73406	4.13e-09		21393119	1365.36	550.541	1.3106	5.03249e-25		21388079	209.235	74.9689	1.48058	5.22e-11
21385974	19.3388	5.82301	1.73628	0.0386656		112090512	249.759	100.693	1.31092	1.07761e-11		21399360	368.527	131.92	1.48208	3.51e-19
112091771	115.469	34.6617	1.73746	5.05e-09		21406719	614.376	247.069	1.3145	3.44991e-10		21384937	86.7496	31.0204	1.48354	1.51e-06
21403514	51.1112	15.2853	1.74184	0.000460231		21390081	877.05	351.889	1.31799	1.7026e-19		21384610	586.633	209.547	1.48486	1.07e-29
21398670	34.5336	10.2837	1.7431	0.0164669		21390946	340.976	136.721	1.31817	4.56017e-07		21401514	759.429	270.814	1.48782	1.8e-33
novel.32	29.249	8.76027	1.74375	0.00663781		21390492	57.0803	22.7693	1.32185	0.00491685		novel.59	32.5783	11.5971	1.49039	0.00482842
21399662	107.229	32.0088	1.74445	1.97e-07		21407014	397.696	159.093	1.32198	1.3383e-15		21402907	744.235	264.893	1.49043	2.41e-31
112093022	24.9725	7.47014	1.7453	0.0118086		21388400	202.269	80.8265	1.32261	4.22801e-09		21402208	414.73	147.554	1.49065	7e-24
21388632	36.9111	11.0373	1.74626	0.00373351		21401416	937.063	374.607	1.32308	3.98681e-20		21384475	312.403	111.095	1.49265	1.98e-11
21406844	305.055	90.9602	1.74727	3.12e-08		21387187	955.231	381.869	1.32324	4.38818e-14		21395395	224.383	79.6945	1.49285	3.13e-14
21404597	126.092	37.6081	1.74742	7.05e-09		21392353	55.5689	22.1648	1.32337	0.00165094		21395678	276.353	98.1107	1.49357	3.61e-17
112093328	120.989	35.9524	1.74852	8.12e-08		21396616	344.423	137.602	1.32341	9.18723e-13		21406661	13539.2	4795.91	1.49728	3.36e-119
21387864	85.2833	25.3511	1.7498	1.97e-05		21386786	256.812	102.485	1.32554	5.80722e-07		21398897	1444.74	511.751	1.49731	3.01e-57
21406491	28.1495	8.38035	1.75064	0.0322352		21392317	85.8025	34.2128	1.32592	2.45091e-05		21407298	397.617	140.84	1.49747	3.41e-22
112093793	962.468	285.421	1.75289	3.83e-27		21385747	1003.82	400.273	1.32605	4.5341e-21		112090409	146.748	51.9408	1.49945	2.8e-07
21390008	207.182	61.4968	1.75353	7.14e-12		21402780	582.019	232.178	1.32624	2.89888e-14		21405271	159.29	56.2137	1.50229	9.05e-10
21394653	35.9177	10.6671	1.75386	0.00260308		21384619	163.486	65.0976	1.32639	2.42248e-05		21412217	92.7852	32.6962	1.50446	1.79e-05
21384836	276.932	81.9993	1.75467	4.1e-14		21404521	32.0587	12.798	1.32681	0.0200259		21403190	153.178	53.9265	1.50686	1.46e-10
21396795	567.76	168.095	1.75539	1.94e-32		112091618	67.4451	26.841	1.32752	0.000283639		21390662	98.0627	34.3985	1.51063	6.35e-07
21384241	50.4208	14.8693	1.7584	0.0140909		112090399	121.317	48.3449	1.32773	4.13703e-06		21398107	122.525	42.8536	1.51422	8.43e-08
21408577	113.815	33.6897	1.75941	9.31e-07		21386224	258.108	102.736	1.32901	5.61894e-11		112092735	443.951	155.293	1.51487	2.93e-24
21384208	123.565	36.4815	1.7618	0.000156325		21390093	26.1954	10.4315	1.32983	0.023471		21410055	67.2964	23.5552	1.51557	0.000204742
21387919	3791.6	1117.66	1.76214	6.47e-50		112092919	68.3536	27.1299	1.33112	0.000878134		21398149	29.3383	10.2828	1.51581	0.012909
21406975	4544.91	1338.48	1.76372	6.01e-82		21406103	37.1646	14.8123	1.33144	0.0216381		21388823	4184.84	1461.95	1.51724	5.88e-84
21403140	30.769	9.06291	1.7647	0.0042634		21384687	226.484	89.9511	1.33325	4.25279e-10		21387335	257.824	90.0757	1.51757	8.34e-10
21397021	67.4589	19.7655	1.76843	0.000527303		112093280	138.649	55.0088	1.33361	5.68183e-08		21387435	36.3518	12.7213	1.51843	0.0327705
21395718	607.869	178.125	1.76975	1.17e-20		21398664	64.312	25.4594	1.33511	0.000541499		21388619	1117.98	390.055	1.51919	3.8e-39
21400554	954.439	279.444	1.77167	1.95e-48		21410283	459.438	181.902	1.33597	1.71995e-17		21403690	4906.26	1709.68	1.52094	1.84e-70
21394924	20.9295	6.11876	1.77275	0.0372313		21399326	29.6263	11.7073	1.33633	0.0341497		21404082	173.975	60.5816	1.52126	2.18e-09
21389527	114.812	33.633	1.77376	3.87e-06		112093991	388.332	153.785	1.33658	1.05124e-10		21390550	55.7634	19.4002	1.52228	0.000138941
21401017	68.8024	20.146	1.77575	3.84e-05		21386010	459.273	181.862	1.33666	1.27883e-17		21395700	144.201	50.0888	1.52508	1.11e-09
21390178	21.1609	6.18689	1.77663	0.0243646		21386918	83.8816	33.2337	1.33673	2.33529e-05		21407061	197.268	68.5591	1.52516	9.44e-13
21393554	30.8998	9.00908	1.78064	0.0370989		21392291	329.991	130.662	1.33778	1.78678e-13		21392331	45.1657	15.6653	1.52677	0.000541191
21384991	40.0211	11.6369	1.78159	0.00122418		21392581	58.3658	23.0807	1.33793	0.0176919		21409153	6925.59	2401.04	1.52827	2.32e-73
21395541	140.754	40.9179	1.78397	9.95e-10		21392601	28.1098	11.1388	1.33876	0.0348443		21412406	1325.21	458.446	1.53133	5.9e-57
21391923	70.2094	20.4263	1.7848	2.26e-05		21404991	354.856	140.313	1.33963	6.31403e-11		21393840	50.2642	17.3598	1.53303	0.000468485
21410489	92.5021	26.8294	1.78831	4.9e-05		21403155	217.348	85.9154	1.33977	9.79858e-11		21387187	1122.46	387.824	1.53309	6.15e-41
21406976	32.5014	9.43481	1.79231	0.0229301		21387699	212.273	83.9024	1.34026	8.08376e-09		21406657	16.7734	5.79126	1.53357	0.0401725
21396880	43.792	12.614	1.79327	0.000619988		21403334	339.888	134.235	1.34097	2.47712e-13		21390621	913.971	315.578	1.53426	1.52e-06
21399410	615.887	177.817	1.79338	4.3e-19		21386832	629.057	248.011	1.34191	2.52832e-17		21402062	141.562	48.7495	1.53795	4.5e-08
21391132	807.764	232.884	1.79443	6.58e-42		21386174	367.595	145.073	1.34231	3.54277e-12		21385814	27.7179	9.54486	1.53811	0.00817922
21395460	211.517	60.5906	1.80309	1.5e-15		21408021	314.694	123.905	1.34596	3.54992e-11		21383913	39.6571	13.6223	1.54094	0.00132483
21390620	60.8967	17.4816	1.80436	0.0162335		novel.735	53.8898	21.2036	1.3461	0.00451943		21392340	139.969	48.1043	1.54128	1.65e-09
21409152	29.4207	8.42499	1.80845	0.00925223		21398390	1756.09	690.768	1.34611	3.80478e-24		21407271	93.5943	32.0293	1.54651	3.55e-06
21393853	184.491	52.4871	1.81402	1.86e-14		21408277	57.3286	22.5713	1.34639	0.00248269		21405471	2605.2	891.589	1.54689	3.71e-71
21396268	292.03	83.0531	1.81594	6.14e-13		112094692	63.935	25.1854	1.3465	0.000846416		21396538	7619.66	2604.23	1.5489	6.46e-109
21407956	77.6729	22.05	1.817	4.27e-07		21396742	128.871	50.6807	1.34661	1.81639e-07		21409770	49.0273	16.6973	1.55356	0.000214875
21398723	83.1256	23.5912	1.81812	6.8e-06		21386313	528.471	207.527	1.34856	5.78962e-14		21395788	67.0557	22.8243	1.55439	4.06e-05
21393029	52.7087	14.9128	1.81872	0.000118076		21389392	53.8525	21.1634	1.34892	0.000705169		21390262	37.061	12.5962	1.55616	0.00206526
112094625	28.5838	8.12065	1.82099	0.0257694		21398434	80.4223	31.546	1.35045	5.40871e-05		21385251	70.3213	23.9024	1.55776	1.14e-05
21390474	795.339	224.794	1.82229	7.5e-37		21403322	1501.14	587.866	1.3528	9.03892e-19		21390795	170.872	57.9961	1.55939	3.35e-12
21404133	447.347	126.461	1.8223	3.66e-24		21405767	319.209	124.968	1.35387	5.51387e-12		21387186	1724.45	584.452	1.56082	1.29e-50
21405036	406.428	114.276	1.83004	3.88e-28		21388769	27.4296	10.7344	1.35396	0.0171734		21394948	51.5953	17.4957	1.56341	0.0017437
21401432	72.6687	20.3822	1.83477	1.75e-05		21385601	838.1	327.888	1.35426	7.63811e-18		21405919	315.197	106.552	1.56406	7.48e-17
21397857	573.92	160.701	1.83564	2.27e-32		21410222	33.5039	13.0757	1.35564	0.00967505		novel.1154	32.2312	10.8802	1.56517	0.00508454
novel.362	35.8957	10.0412	1.83663	0.00172378		21410289	122.813	47.9258	1.3567	2.62784e-06		21394127	941.394	316.171	1.57418	1.28e-27
21399494	39.3295	11.0493	1.83713	0.00519862		21396441	497.017	194.112	1.35713	6.61788e-19		21384167	20.2958	6.80816	1.57513	0.0255393
21384531	65.1113	18.1378	1.84467	1.35e-05		112094731	1667.55	650.116	1.35882	1.89621e-18		21394077	1490.79	500.224	1.57552	7.76e-67
21402398	331.519	92.3563	1.84568	2.9e-13		21397662	169.746	66.1275	1.35928	7.51008e-09		21390531	150.641	50.4809	1.57751	6.71e-10
21405215	373.798	104.046	1.84679	1.29e-10		21396245	914.391	356.184	1.3605	3.21314e-20		21401263	1641.5	549.86	1.57802	3.33e-51
21406657	19.7912	5.50376	1.85024	0.018918		21411279	42.3961	16.4778	1.36121	0.00587411		21390607	45.7922	15.3115	1.57914	0.000360934
21391051	206.862	57.3118	1.85081	8.04e-15		21409814	332.006	129.175	1.36121	1.3087e-10		21386318	2227.49	745.07	1.58007	1.69e-69
21385024	68.9311	19.0961	1.85384	5.06e-05		21408351	73.4067	28.5558	1.36229	0.000112549		21408870	91.9242	30.7397	1.58146	5.72e-07
21398919	144.006	39.86	1.85534	1.77e-10		21404992	28.4021	11.0729	1.36259	0.0281039		21399849	223.816	74.6332	1.58414	4.63e-16
21405855	65.5771	18.0789	1.85609	3.39e-05		21407314	249.541	96.9724	1.36277	7.13624e-11		21393314	24.4785	8.13906	1.58577	0.022451
21397181	271.497	74.8306	1.85794	1.65e-18		novel.1068	34.6737	13.4641	1.36378	0.0108841		21410454	27.7326	9.22878	1.58919	0.00570137
21401518	33.0435	9.10297	1.85929	0.00280084		112094950	122.754	47.7027	1.36409	5.059e-07		21406237	50.302	16.7054	1.59033	0.000170771
21390028	896.939	246.475	1.8637	0.0423062		112090475	269.021	104.403	1.36609	6.474e-10		21386242	92.5768	30.6913	1.59291	1.83e-07
21390240	196.167	53.7069	1.86675	3.86e-11		21399915	252.678	97.9643	1.36636	2.4152e-13		21388769	32.9059	10.9001	1.59327	0.00272007
21387315	17.8411	4.84239	1.87698	0.0352502		21390050	788.674	305.717	1.36693	1.03247e-17		21387041	7415.51	2449.51	1.59806	1.05e-76
novel.961	19.0327	5.17938	1.87753	0.0199403		novel.942	780.661	302.504	1.3671	2.79374e-17		21402937	753.448	248.167	1.60219	2.2e-30
21400775	169.686	46.0102	1.88121	3.64e-13		21385208	51.8005	20.0666	1.36753	0.00363682		21386608	321.042	105.722	1.60254	2.09e-16
21394041	169.772	46.0263	1.88424	1.28e-07		21389632	719.679	278.708	1.36814	7.69531e-22		21396245	1099.73	361.759	1.60447	1.5e-45
21401630	1165.04	315.487	1.88485	0.0301989		21406437	42.4155	16.4411	1.36819	0.00212336		21401699	2070.37	679.833	1.60681	9.55e-59
21408578	26.3178	7.15948	1.88522	0.0159125		21400203	318.851	123.587	1.36834	9.81897e-12		112095171	23.8563	7.80842	1.60849	0.0124513
112095046	172.396	46.5829	1.88581	1.74e-08		21393854	422.233	163.476	1.36953	6.98622e-14		21399915	303.483	99.4862	1.60863	7.26e-20
21407713	372.383	100.517	1.88986	0.00447604		21392597	494.263	191.218	1.37016	1.11579e-14		21392103	970.192	318.021	1.60903	1.44e-43
21388924	35.9454	9.7174	1.89036	0.00169497		21394739	141.296	54.6341	1.37033	5.775e-07		21408100	90.5906	29.6438	1.61134	2.75e-07
21399316	37.0806	10.0304	1.89154	0.0248207		21401178	1290.58	499.355	1.37037	2.92329e-24		112094014	273.726	89.2925	1.61597	1.77e-18
21401102	512.913	138.05	1.89327	5.87e-35		21393412	429.602	165.884	1.37238	6.98577e-12		21392224	2108.06	687.749	1.61601	1.11e-65
21404513	34.69	9.33748	1.89404	0.00842372		21404580	597.195	230.631	1.37248	6.50557e-17		21408652	56.4668	18.4192	1.61634	7.38e-05
21388180	16.7783	4.50999	1.89535	0.0471476		21401558	241.099	93.1367	1.37259	1.96713e-06		novel.647	47.1246	15.3765	1.61688	0.000740217
21388375	118.636	31.7095	1.90257	2.27e-08		21407795	111.177	42.8966	1.37344	2.06393e-05		21395428	106.725	34.7583	1.6182	1.13e-08
21406804	53.3667	14.2222	1.90662	4.85e-05		21393825	1201.82	462.789	1.3767	2.9248e-21		21384506	172.732	56.2657	1.6185	4.12e-11
21388453	37.6951	10.0338	1.90741	0.0277905		21392056	50.6066	19.4721	1.37896	0.000612214		novel.1141	37.7289	12.2721	1.62024	0.000999359
21401370	90.1312	24.0038	1.90787	1.23e-07		21406570	1131.06	434.379	1.38044	1.16749e-34		novel.627	243.504	79.0923	1.62229	2.7e-15
novel.724	403.896	107.316	1.91245	1.52e-30		21386808	38.5025	14.8095	1.38084	0.00806953		21399161	16.7749	5.43417	1.62341	0.0364724
21406379	36.8206	9.7323	1.9165	0.00447604		21391489	110.9	42.6312	1.38108	2.92372e-06		21386336	11416.5	3704.51	1.62378	5.44e-71
21408459	143.534	37.9291	1.92182	3.39e-12		21407061	175.887	67.5048	1.38328	1.1809e-07		21389080	494.257	159.445	1.63182	1.26e-23
21388531	46.4608	12.2999	1.92257	0.00560023		21384506	144.469	55.403	1.38341	1.14734e-08		21390612	896.646	288.877	1.63374	2.03e-44
21405565	29.4651	7.7991	1.92456	0.0127768		21386284	183.07	70.1981	1.38399	5.90321e-09		112093384	186.676	60.1762	1.63491	1.53e-11
21395441	107.975	28.4765	1.9249	4.06e-05		21407757	258.63	99.1087	1.38483	4.65932e-12		21388661	288.256	92.271	1.64267	7.03e-19
21395046	82.8673	21.6975	1.93251	2.26e-07		21409686	324.404	124.131	1.38592	2.02183e-15		21386281	78.616	25.132	1.64343	2.84e-05
21405253	14.9142	3.88811	1.93427	0.0427082		21395926	496.621	189.989	1.38592	0.00387864		21383918	435.612	139.43	1.6435	3.4e-30
21412141	225.91	59.0791	1.93689	2.76e-08		21402739	5538.71	2118.65	1.38653	6.95216e-44		21391295	893.258	285.724	1.64444	8.53e-33
novel.556	56.0101	14.5592	1.9478	0.0004345		21387756	22.7816	8.70071	1.38863	0.0327121		21406759	283.773	90.6302	1.64633	2.91e-17
21407805	28.7981	7.4667	1.94986	0.00508426		21384688	125.503	47.9749	1.38864	4.58212e-06		21396445	48.0282	15.3388	1.6467	0.000220238
21396667	26.0954	6.7664	1.95015	0.0199683		21399561	35.148	13.4057	1.38872	0.00888997		21398724	23.5371	7.52623	1.64742	0.0101508
novel.260	127.796	33.0403	1.95454	1.48e-07		112095412	210.75	80.516	1.38881	6.09123e-11		21409705	30.9598	9.87075	1.64797	0.00246722
21396092	66.5877	17.1933	1.95487	9.82e-07		21406395	944.695	360.743	1.38885	8.57017e-32		21410475	76.1365	24.2503	1.65162	5.31e-06
21388571	58.8318	15.1988	1.9554	7.58e-05		21384728	320.1	122.23	1.38892	5.60823e-16		112092610	38.7187	12.2967	1.65589	0.000862541
21404364	170.263	43.7613	1.96096	0.0242688		21385569	846.88	323.264	1.38905	2.68637e-25		21406470	173.446	54.8334	1.66077	1.89e-13
112091405	276.409	70.4853	1.9716	1.32e-15		112095003	36.1318	13.7884	1.38998	0.0173839		21393867	1837.23	577.841	1.66875	1.37e-64
21387651	739.968	188.687	1.97167	0.0182364		112095238	243.646	93.0044	1.38999	8.63012e-10		21389464	70.6298	22.1767	1.67173	1.72e-06
21384057	52.0531	13.2577	1.97524	6.57e-05		novel.193	22.8399	8.71596	1.39007	0.0405258		21411057	146.725	46.0155	1.67279	8.51e-12
21406311	26.6392	6.80419	1.97547	0.0180358		21402907	683.682	260.824	1.39074	9.48836e-24		21407748	347.034	108.708	1.67432	5.52e-24
21391014	71.1674	18.1058	1.9755	8.05e-06		21409122	980.008	373.716	1.39097	1.00681e-25		21389520	566.649	177.036	1.67866	2.84e-30
21395326	409.163	103.965	1.97619	1.93e-32		21398320	463.748	176.909	1.39105	1.92616e-11		novel.361	22.8926	7.14327	1.6787	0.0111747
21388152	15.2244	3.88868	1.97626	0.0485969		21409954	140.041	53.3422	1.39177	2.34564e-07		21408278	1618.44	504.753	1.68113	4.1e-62
21391450	69.2966	17.5091	1.9831	7.43e-07		21391962	37.0649	14.1195	1.3926	0.0183569		112091365	25.1496	7.83635	1.68187	0.00632342
21410106	21.7282	5.50433	1.9849	0.0161766		112094512	14726.9	5609.13	1.39265	8.44812e-24		21396666	55.7303	17.3393	1.68295	9.44e-05
21408797	59.1925	14.9357	1.98559	4.23e-05		112092984	75.8606	28.8068	1.39386	0.000154694		21396417	198.276	61.5988	1.68561	8.17e-13
21407637	40.0253	10.0573	1.99229	0.000246211		21403370	850.701	323.773	1.39401	1.00692e-25		21392247	24.1857	7.52088	1.68688	0.0157562
112090278	18.0303	4.52258	1.99347	0.0255945		21411327	61.8939	23.5887	1.39479	0.00121866		21386011	315.993	97.9496	1.68869	5.93e-16
21385418	59.3502	14.8779	1.9974	8.14e-06		21387766	203.598	77.3789	1.39487	2.76861e-08		21404543	1638.85	507.651	1.69079	2.35e-60
21401371	574.986	143.851	1.99793	4.46e-19		21384615	420.412	159.774	1.39513	3.47267e-16		21409259	24.1987	7.48847	1.69097	0.0103669
21388490	251.515	62.8116	1.9996	2.89e-16		21399836	1075.47	408.673	1.39597	3.18669e-31		21407727	305.091	94.443	1.69175	2.8e-22
112094218	110.016	27.5136	2.00079	1.02e-08		21394432	44.2915	16.8377	1.39658	0.00246589		112095076	4714.06	1457.94	1.69305	2.76e-52
21407309	90.3946	22.395	2.0129	2.15e-07		21400400	3343.59	1269.98	1.39659	1.84157e-58		21395785	57.3903	17.768	1.69308	3.82e-05
21389338	28.8442	7.14288	2.02012	0.0488787		21389486	151.17	57.3901	1.3967	4.8196e-09		21392435	4189.58	1295.16	1.69356	9.1e-88
21399646	39.328	9.69451	2.0238	0.00460685		21393563	1169.27	444.017	1.39717	2.60808e-19		21404112	124.763	38.6085	1.69369	8.42e-10
21406914	40.8254	10.0275	2.02685	0.00017379		21410337	6751.46	2562.77	1.39754	5.69787e-16		21403486	216.741	66.4132	1.70576	1.07e-15
21391820	74.4338	18.1275	2.04009	9.98e-06		21410270	35.4157	13.4332	1.39839	0.00715773		21384081	16.7579	5.09966	1.71455	0.0265159
21384733	68.1044	16.5055	2.04812	0.00276208		21405225	124.714	47.3149	1.39959	2.83644e-07		21401682	21.2711	6.4689	1.71653	0.0122032
21398222	954.534	227.513	2.06858	6.78e-56		21384047	106.248	40.2553	1.40025	8.94991e-07		21401904	1112.87	337.842	1.71985	6.34e-50
21397496	27.2476	6.49754	2.07339	0.00233789		21404638	56.7318	21.4564	1.40035	0.00191338		21393487	124.762	37.8797	1.72046	8.22e-11
21397785	142.968	33.986	2.07375	5.95e-13		21407045	368.256	139.268	1.40354	4.61825e-16		21395116	3271.76	992.292	1.7213	3.81e-95
21389278	122.939	29.1207	2.08036	6.65e-07		21396190	145.009	54.711	1.40401	2.54562e-06		21391025	2195.5	664.093	1.72508	1.68e-79
21398749	42.4041	10.0607	2.08088	0.000329891		novel.348	34.6064	13.0778	1.40419	0.00604611		21407265	276.291	83.1439	1.73251	2.56e-12
21399320	108.83	25.6223	2.0849	3.54e-07		21408556	520.607	196.661	1.40449	1.26327e-17		21405782	708.55	212.283	1.73912	2.26e-07
21385175	50.9758	12.0076	2.08855	0.000115178		21400795	1637.5	618.265	1.40546	5.02099e-31		21399072	110.882	33.0417	1.74621	1.01e-09
21410222	53.817	12.6226	2.09291	5.07e-06		112094672	518.053	194.958	1.40998	5.18924e-18		21403322	2008.15	597.004	1.74988	6.16e-82
21412606	59.4776	13.9597	2.0941	8.07e-06		21397206	1116.92	420.295	1.41009	4.86495e-19		21410118	21.9291	6.48347	1.75865	0.0101661
21395001	29.0482	6.79102	2.09419	0.00100576		21409515	441.001	165.926	1.41037	3.10289e-08		112095141	21.9652	6.45789	1.76429	0.0459726
21390245	5785.49	1354.13	2.095	9.53e-109		21392639	147.254	55.4033	1.41145	7.74382e-07		novel.1068	46.4426	13.6752	1.76576	0.000147376
21394504	11873.2	2777.04	2.09616	4.16e-47		21386240	1605.23	602.776	1.41312	2.75149e-23		21399731	379.334	111.416	1.76732	1.59e-21
21395483	66.334	15.5341	2.09714	4.03e-06		21401076	432.503	162.17	1.41514	8.98074e-20		21402933	1253.4	367.199	1.77097	1.69e-44
21385003	749.626	174.703	2.10081	2.38e-44		21401159	371.81	139.306	1.41546	1.76793e-15		21398766	465.871	136.37	1.77246	3.18e-32
21410454	37.5853	8.76999	2.10284	0.000208438		21395798	893.325	334.503	1.41664	3.244e-24		21404681	323.632	94.6592	1.77295	2.63e-20
21407842	23.7849	5.51292	2.11703	0.0240757		21404908	192.882	72.1468	1.41801	1.91711e-05		21395482	395.627	115.474	1.77613	2.76e-25
112090790	1298.24	299.207	2.11749	1.4e-05		21412140	73.4899	27.5001	1.41829	2.62909e-05		21404899	168.385	49.0026	1.77962	1.04e-12
21395668	140.693	32.3778	2.11946	3.46e-14		21406008	3741.55	1399.32	1.41906	6.83397e-41		21401749	1523.94	443.191	1.78231	1.71e-34
21410421	49.2016	11.3371	2.11965	0.000104363		21387391	327.955	122.572	1.4199	5.76831e-15		112095140	16.4403	4.77764	1.78371	0.0248564
21406762	60.6455	13.9282	2.12443	1.16e-05		21400522	777.891	290.154	1.4223	2.31804e-24		21384609	12.8917	3.73695	1.78407	0.0486064
21398604	42.633	9.74145	2.1272	0.000263854		21396390	328.718	122.391	1.42464	2.24609e-14		21385288	174.785	50.7102	1.78408	2.01e-14
21401741	336.696	77.0933	2.12724	0.000855058		112091011	143.553	53.4043	1.42472	1.33615e-06		21399296	45.7719	13.2744	1.78479	9.92e-05
21395891	43.9186	10.0384	2.1308	0.00011309		21398180	39.5826	14.7219	1.42524	0.00441013		21394900	96.4527	27.9439	1.78693	4.42e-08
21398573	56.7688	12.9447	2.13369	1.09e-05		21388602	192.009	71.4771	1.42618	4.49124e-11		21399742	1151.82	333.075	1.79	4.31e-72
21388707	169.972	38.5504	2.13892	3.02e-15		21407770	329.306	122.502	1.42632	6.58128e-17		21391769	14.1956	4.09732	1.79367	0.037032
21388569	29.9868	6.7538	2.15181	0.0153976		21401352	15020.6	5584.31	1.42751	3.12784e-33		21399494	40.248	11.6191	1.79392	0.00332808
21403423	383.504	86.1265	2.15325	6.8e-30		21388552	150.138	55.6285	1.4306	3.20045e-08		21393685	933.666	268.65	1.79717	2.87e-42
112093393	276.718	62.1027	2.15447	2.49e-19		21400389	3272.56	1211.96	1.43321	1.20459e-32		21388288	28.4194	8.15362	1.79889	0.00690805
21395589	213.42	47.9766	2.15507	4.24e-19		21407407	419.882	155.411	1.43416	2.65504e-21		21408353	3260.39	935.549	1.80113	9.29e-67
21389245	42.1995	9.39244	2.16388	0.00202737		21398496	20.8323	7.71699	1.43435	0.032138		21385083	117.974	33.7955	1.80457	3.12e-10
21409291	31.8616	7.0845	2.1643	0.00319184		21392061	253.162	93.662	1.43477	2.75219e-11		21388125	16.752	4.78893	1.80914	0.0290389
21408924	29.0329	6.46433	2.16464	0.00174778		21385351	595.347	220.207	1.43501	9.36171e-21		21403430	122.18	34.7283	1.81402	1.19e-10
21401456	144.379	32.1736	2.16691	0.0268138		21406810	1394.27	515.054	1.43716	2.36211e-25		novel.355	26.4643	7.51701	1.81714	0.00397302
112092317	29.0604	6.49811	2.16893	0.0120506		21404893	3734.48	1379.06	1.43726	4.76278e-48		112094177	17.0847	4.80884	1.83418	0.0262741
21383839	36.3344	8.10862	2.16983	0.0245656		21396523	820.226	302.85	1.43777	1.13859e-21		112093907	89.0125	24.8643	1.83922	9.13e-09
21404858	64.3648	14.2572	2.17213	1.66e-06		21399860	69.1834	25.5245	1.43841	7.60392e-05		21409180	359.756	100.304	1.84313	4.93e-25
112094307	63.0367	13.9734	2.1731	2.5e-05		21386309	508.887	187.744	1.43888	9.18786e-20		21391502	5627.84	1565.93	1.84563	3.35e-157
21399860	111.294	24.6262	2.17546	8.24e-12		21388657	138.223	50.9897	1.4394	3.85688e-07		21391354	702.134	194.939	1.84859	1.17e-45
21401737	27.8281	6.17773	2.17786	0.00175442		21385556	27.3818	10.0855	1.43954	0.0173095		21408604	7936.4	2200.56	1.85071	3.89e-122
21387021	54.1042	11.967	2.1809	0.00082779		21398945	1500.94	553.277	1.43965	1.26805e-30		21405446	60.2711	16.6953	1.85177	5.36e-06
21395729	33.759	7.4255	2.18181	0.000603332		21405603	42.0136	15.4574	1.44009	0.00264114		112095106	477.055	131.868	1.85472	5.14e-32
21403754	2077.69	456.334	2.18693	4.83e-80		21405219	48.2045	17.775	1.44033	0.00124332		novel.354	28.4088	7.83695	1.85732	0.003437
21388416	20.8755	4.5449	2.19946	0.00452285		21389899	768.895	283.288	1.4411	7.63316e-14		21390150	66.7527	18.41	1.85833	7.63e-07
21405415	1258.38	273.823	2.20052	3.29e-53		21403699	1761.26	648.072	1.44274	5.06488e-28		21401750	3976.78	1088.01	1.87005	4.05e-76
112093255	16.5311	3.57344	2.20872	0.019101		21395395	213.641	78.4766	1.4456	2.01396e-10		21396143	196.067	53.6556	1.87109	1.18e-15
novel.807	23.9485	5.1891	2.21392	0.0125401		21396256	842.574	309.211	1.44635	1.85372e-12		21390809	1884.36	512.63	1.87829	7.3e-96
21391030	64.5092	13.915	2.21503	1.42e-06		21402320	45.7147	16.7756	1.44682	0.00126952		21399912	47.7297	12.942	1.88207	3.62e-05
21392993	149.736	31.9721	2.22495	3.09e-12		112095049	44.9538	16.4778	1.44828	0.0035329		21400990	13501.9	3659.27	1.88353	4.08e-106
21397142	31.9038	6.83339	2.22683	0.000725578		112092690	39.3568	14.4404	1.44867	0.00352992		novel.1208	154.817	41.958	1.88385	1.67e-11
112091334	24.9248	5.19254	2.26351	0.00127706		21404260	564.241	206.693	1.44904	3.50206e-15		21385705	144.767	39.1476	1.88583	6.97e-12
21388954	18.7708	3.88009	2.26805	0.0138696		21411381	17.4064	6.35974	1.44964	0.0491298		112093953	244.98	66.0624	1.89019	1.76e-17
21409963	2066.16	428.022	2.27072	5.14e-63		21409297	775.954	284.087	1.45002	1.44065e-30		112090663	15.1555	4.07681	1.89167	0.0232525
21384950	64.4262	13.2662	2.27733	3.94e-07		21385706	42.059	15.3785	1.45049	0.00981424		21386763	404.324	108.399	1.89912	4.67e-30
21397670	135.978	27.7516	2.28957	1.08e-10		21408695	144.989	52.956	1.45294	3.66329e-06		21410270	50.9381	13.6428	1.90102	8.12e-06
21392772	167.856	34.3213	2.29154	9.59e-15		21387499	80.8293	29.5128	1.4531	9.40845e-06		21408856	99.6377	26.5702	1.9063	5.59e-10
21403525	91.9326	18.7757	2.29449	4.33e-08		21402089	49.927	18.1933	1.4542	0.0162857		21404128	81.9491	21.8897	1.90644	2.63e-07
21410491	26.8554	5.47343	2.29574	0.00681109		21391036	63.4278	23.156	1.4551	0.000862845		21408277	86.1045	22.9272	1.91151	6.27e-08
21396820	428.304	87.099	2.29875	1.66e-16		21387295	164.897	60.0496	1.45674	1.68656e-08		21410136	817.588	217.307	1.91206	6.41e-56
novel.1126	17.6133	3.56429	2.30163	0.0143701		21384937	83.8966	30.5467	1.45727	3.80309e-06		21386786	392.512	104.09	1.91561	1.49e-26
21409790	46.3057	9.41419	2.3031	0.000252607		112091964	108.885	39.6308	1.4579	2.43531e-07		112093864	21.9253	5.78859	1.92041	0.00446328
21396544	41.4709	8.37003	2.30589	0.00227464		21386951	1106.65	402.659	1.45878	9.84086e-21		21412031	28.6446	7.55416	1.92703	0.010724
21410510	250.29	50.1535	2.31695	8.12e-21		21408354	516.405	187.646	1.4599	5.61585e-23		21397104	359.087	94.372	1.92756	8.08e-30
21385864	329.758	66.0652	2.3189	4.3e-28		21392184	1000.51	363.281	1.4618	2.10546e-15		21404773	157.399	40.9625	1.94272	1.91e-11
21399546	79.506	15.9249	2.32144	8.76e-09		21408697	22.2555	8.09053	1.4625	0.0312946		21397165	1117.53	289.418	1.94903	4.97e-53
112090609	127.866	25.6406	2.32168	2.31e-08		21388899	92.6004	33.594	1.46252	6.54311e-05		21400575	8516.29	2194.62	1.95626	5.44e-122
21397212	137.954	27.4639	2.32565	2e-13		21396922	287.382	104.086	1.46558	2.24868e-12		21406719	975.981	250.928	1.95957	8.32e-57
21403061	105.551	21.0619	2.32612	2.24e-12		21388789	622.596	225.19	1.46667	1.19709e-13		21407103	410.431	105.364	1.96192	9.83e-33
novel.1136	314.423	62.2939	2.33492	1.17e-22		112091365	21.3469	7.71532	1.46678	0.0277722		21405070	414.229	105.696	1.97065	9.59e-33
112093890	29.5829	5.8482	2.34093	0.000871472		21389640	89.0632	32.1661	1.46836	4.48906e-05		21389896	7670.27	1953.22	1.97346	6.4e-141
21397088	140.142	27.5079	2.35111	4.29e-11		21384364	137.607	49.7094	1.4691	1.81836e-07		21384669	154.663	39.2662	1.97896	1.73e-13
21402089	89.7199	17.5692	2.35698	5.29e-07		21409203	303.037	109.351	1.47089	3.25755e-12		21404777	3023.6	765.937	1.98093	5.04e-62
21393282	79.7329	15.5988	2.35725	1e-06		21384423	48.3476	17.4014	1.47172	0.00366141		112092749	297.025	75.2191	1.98106	0.0111661
21395853	60.4168	11.717	2.37174	0.00013955		112094396	394.791	142.319	1.47206	5.06131e-10		21407757	398.172	100.663	1.9845	1.02e-33
novel.486	9734.68	1879.14	2.37305	0.0466433		21391606	1434.43	516.435	1.47415	5.76978e-18		21384071	13.5369	3.40304	1.99077	0.0290019
21397562	210.873	40.5116	2.37831	1.95e-16		21403285	3264.45	1174.78	1.47456	4.64164e-35		21393555	44.8478	11.2917	1.99224	5.2e-05
21391962	70.7213	13.6261	2.38065	2.91e-06		21387574	363.216	130.521	1.47647	2.72428e-14		112091806	1843.9	463.234	1.99286	1.36e-93
21393901	40.716	7.76305	2.3864	3.99e-05		21387216	29.8985	10.729	1.47658	0.00681448		21394607	166.911	41.9075	1.99358	5.51e-15
21383736	118.526	22.6598	2.3876	2.64e-13		21409153	6579.96	2364.24	1.47677	1.42137e-38		21388824	153.51	38.4914	1.99509	8.7e-15
21409211	33.9843	6.45919	2.39077	0.000126344		21389896	5354.25	1923.18	1.47731	3.02867e-43		21386723	84.4636	21.1538	1.99805	1.24e-08
21406153	13.5611	2.59169	2.39452	0.0296072		21390920	1106.82	397.149	1.47845	1.62534e-27		21395807	40.942	10.2641	1.99854	0.000143569
21410928	1492.75	283.798	2.39564	1.79e-54		112092863	64.5443	23.1482	1.47884	0.000125246		112091870	17.7338	4.43718	1.99976	0.00883592
21393819	39.1822	7.4272	2.39661	4.08e-05		21390836	120.869	43.3437	1.48064	2.99927e-07		112092891	65.4534	16.3278	2.0015	2.59e-07
21409147	25.657	4.85041	2.40045	0.00138404		21397855	69.2812	24.828	1.48066	0.000223867		21387523	23.2095	5.78799	2.00265	0.00267238
21385680	32.582	6.1514	2.40243	0.000127487		21391796	5647.28	2016.31	1.48575	2.99098e-49		21407567	28046	6968.82	2.0088	1.12e-102
21408879	217.671	41.0865	2.40458	1.41e-23		21385042	533.943	190.586	1.4858	2.41758e-19		21391750	863.769	214.487	2.00978	3.74e-37
21398541	44.5711	8.43702	2.40461	8.28e-06		21388390	87.4202	31.1589	1.48619	9.50301e-06		21386068	32.9286	8.15422	2.0118	0.00609118
novel.233	13.7697	2.59627	2.40514	0.0180215		21399492	4013.53	1431.93	1.48702	2.72936e-40		21410015	15905.6	3941.69	2.01264	6.46e-189
21397495	30.7737	5.79437	2.40816	0.00219993		21395281	170.834	60.7699	1.49091	1.38169e-08		21386859	75.7127	18.7644	2.01327	1.1e-07
21390063	18.9295	3.54655	2.40956	0.00639077		21405719	531.117	188.801	1.49171	1.8423e-14		21384384	15.1641	3.7435	2.01687	0.0310015
21387014	825.314	154.783	2.41485	0.00357782		21408913	144.564	51.3615	1.49194	2.49315e-09		21384539	117.374	28.9349	2.01918	1.06e-11
21405846	325.008	60.5488	2.4227	2.18e-24		21403628	728.323	258.868	1.49212	5.88249e-25		21385676	64.2145	15.6932	2.03306	1.94e-06
21399975	1274.82	237.27	2.42633	2.55e-41		21396878	246.94	87.5081	1.49661	1.33887e-11		21395153	5021.33	1223.12	2.03754	2.63e-104
21402003	64.4195	12.0013	2.42888	0.000124635		21392251	1162.86	412.127	1.49669	1.97305e-30		21403302	328.853	79.6546	2.04463	1.3e-29
21393962	1143.91	212.36	2.42965	3.02e-10		21412208	53.0975	18.8096	1.49719	0.000241893		21405106	56.3676	13.6579	2.04646	7.84e-06
21410424	89.0891	16.5113	2.43152	1.28e-11		21410136	603.908	213.971	1.49752	6.02955e-24		21401028	12011.7	2904.29	2.04824	8.14e-123
21401786	15430.5	2838.41	2.44261	0.0403361		21406515	177.167	62.7591	1.49772	2.78944e-07		112092515	10253.7	2471.06	2.05293	4.83e-26
21408136	12.4118	2.25986	2.45823	0.0422461		21405007	43.6203	15.4282	1.49834	0.000987286		21406217	1283.36	308.424	2.0571	1.32e-39
21385286	65.89	11.9773	2.45965	1.01e-07		novel.763	26.5954	9.41077	1.49865	0.010373		21406662	1388.11	332.228	2.06268	1.14e-70
112094826	12.4693	2.2507	2.46013	0.0364291		21406896	332.18	117.27	1.50197	1.95627e-12		21398953	107.126	25.5842	2.06624	3.76e-10
21400677	19.6415	3.55169	2.47222	0.0157291		21405336	594.55	209.996	1.502	3.97582e-23		21399556	97.3802	23.185	2.07054	3.27e-11
21403373	87.7452	15.5438	2.49685	1.16e-11		21399742	929.62	327.967	1.50287	7.97696e-38		21401458	76.0613	18.1338	2.07091	3.4e-07
21388125	25.702	4.54948	2.50198	0.00103364		21405265	1188.46	419.324	1.50331	1.5736e-34		21392638	130.909	31.1248	2.0744	7.13e-11
21398547	16.7688	2.94241	2.51194	0.0259594		21385822	434.858	153.334	1.50435	4.32967e-15		21407795	183.777	43.5645	2.07565	8.45e-17
21409457	13.0159	2.2673	2.51944	0.0239771		21390522	893.261	314.297	1.50694	2.52383e-22		112093234	11.6228	2.71738	2.09353	0.0418828
112093190	11.1087	1.93547	2.52048	0.03117		21408564	537.049	188.947	1.50726	9.63045e-21		112093785	11.6081	2.70876	2.09434	0.0456016
21403396	94.8996	16.5016	2.52069	7.62e-11		21391840	256.92	90.3144	1.5082	1.52906e-11		21389833	82.8841	19.3859	2.09441	2.32e-08
21399132	16.7673	2.90292	2.52496	0.00674097		21384409	732.297	257.358	1.50917	3.64255e-17		21392096	155.166	36.1665	2.10157	7.37e-16
21396196	26.3207	4.48536	2.54534	0.00441133		21397028	390.254	137.099	1.50921	1.31882e-15		112094578	16.1189	3.71169	2.11199	0.0284829
21409718	36.0377	6.15368	2.54844	0.0005366		21410172	2693.28	945.991	1.50929	2.58474e-48		novel.68	19.3375	4.42796	2.12617	0.00903459
21411384	32.2424	5.48315	2.55716	0.00104786		21396955	6198.66	2174.99	1.51103	1.34008e-23		21404550	603.649	138.157	2.12774	2.33e-42
21404914	140.84	23.9643	2.5576	7.47e-13		21394901	634.045	222.358	1.51159	5.69802e-12		21389575	16.4158	3.75152	2.13034	0.0126359
novel.833	24.7472	4.20792	2.56237	0.0078868		21398934	405.714	142.316	1.51202	1.80165e-20		21385557	50.9514	11.5911	2.13608	1.19e-06
21399658	34.5632	5.81499	2.57436	0.000190257		21400022	705.747	247.402	1.51214	2.55655e-33		21398706	142.542	32.4212	2.1371	1.49e-14
21393368	30.9568	5.15933	2.58159	0.000250132		21407330	52.5873	18.4328	1.51214	0.000527525		21406697	127.68	28.9926	2.1392	3.99e-14
21404044	344.183	57.1544	2.59042	0.00066468		21389924	99.4056	34.8274	1.51222	1.48378e-05		21407886	230.86	52.1725	2.14586	4.57e-25
21384058	29.3251	4.84697	2.5992	0.00101633		21390439	44.9488	15.7688	1.51244	0.000919211		21388514	48.3422	10.9373	2.14619	4.01e-06
21386171	125.094	20.6545	2.59923	9.68e-08		21399291	349.686	122.377	1.51414	7.5773e-13		21407750	5432.68	1221.61	2.1529	1.36e-132
112091135	17.8606	2.91207	2.61037	0.0129629		21399575	41.2337	14.4322	1.51457	0.00137667		novel.276	10.6409	2.3796	2.15848	0.0397968
21389178	3158.29	516.176	2.61297	8.47e-142		21393309	234.982	82.2171	1.51557	1.35091e-11		21410705	89.9644	20.1283	2.1607	5.05e-11
21394948	102.02	16.6246	2.61912	0.0274841		21404307	104.504	36.5364	1.516	1.4644e-06		21405605	18.3697	4.09612	2.16599	0.0118781
21406932	250.517	40.59	2.627	8.38e-26		21401339	514.692	179.836	1.51652	9.9391e-24		novel.304	12.2763	2.74057	2.16626	0.0468912
21390995	33.9689	5.50433	2.62807	5.62e-05		21390554	171.761	60.0792	1.51712	2.56622e-07		21398513	48.9432	10.8975	2.16672	3.27e-05
21401297	16.2608	2.60543	2.65153	0.0110204		21389683	249.531	87.1583	1.5176	5.94954e-10		21402711	3492.28	775.997	2.16996	4.55e-99
21390461	36.6542	5.84189	2.65163	2.61e-05		21387673	86.4747	30.1603	1.51762	1.58717e-05		21394326	326.93	72.5569	2.17129	2.1e-30
21394044	16.2705	2.59226	2.65411	0.0268068		21405102	281.559	98.2902	1.51826	4.00032e-16		21400022	1132.25	251.254	2.17201	9.69e-91
112093840	11280.7	1778.82	2.6648	4.22e-152		21403426	4532.22	1581.15	1.51908	1.7339e-49		21408662	21.6073	4.77704	2.17799	0.00261637
21412237	376.137	59.2255	2.66553	7.98e-22		21387106	121.109	42.277	1.51963	8.99692e-08		21400070	250.656	55.2416	2.18195	3.11e-25
21392433	14.3488	2.26443	2.66716	0.0162705		21392810	945.132	329.572	1.52007	5.02258e-33		21405903	987.439	217.431	2.18296	2.3e-64
21387254	43.408	6.86143	2.66853	0.000100939		21390510	168.822	58.8041	1.52285	8.61453e-11		21403386	34.2033	7.49055	2.18979	0.000118213
21392902	64.7323	10.0653	2.68989	3.4e-08		112095081	68.3533	23.8093	1.52335	0.00330391		21411635	20.3004	4.43123	2.19582	0.0029722
21399608	38.1873	5.81098	2.71002	8.47e-05		21384187	115.043	39.9541	1.52444	4.42955e-06		112091274	10.9546	2.3802	2.20052	0.0365542
21394638	63.5562	9.67677	2.71015	4.12e-08		21395153	3465.7	1204.33	1.52512	8.46969e-32		21397918	281.552	61.0177	2.20598	3.11e-30
21408103	434.294	66.2476	2.71084	1.7e-40		21394002	56.9082	19.8062	1.52518	0.00207468		21411019	17.4279	3.7429	2.2174	0.00714852
112091822	333.197	50.9058	2.71106	0.000203456		112093410	28.0455	9.71029	1.52646	0.0124557		21397599	47.7314	10.2371	2.22182	4.64e-06
21399095	164.588	25.0926	2.71464	0.0122346		21398156	43.6437	15.1168	1.52736	0.00169657		21395691	256.22	54.533	2.23212	4.9e-23
21398904	100.208	15.1736	2.71923	7.68e-12		112094038	991.036	343.671	1.52742	1.92725e-10		21403544	63.2316	13.3276	2.24769	1.66e-06
21403970	34.1865	5.1622	2.72276	2.77e-05		21401904	959.303	332.679	1.52791	1.4226e-24		21410286	421.154	88.4752	2.24994	8.89e-33
novel.66	10.8198	1.62424	2.74014	0.0244163		21397753	111.592	38.606	1.53079	8.35976e-07		21396955	10613.2	2208.94	2.26443	2.13e-138
21384862	30.582	4.52201	2.75559	0.000141627		21394858	1898.28	656.627	1.53138	2.22715e-44		21397612	138.34	28.6429	2.27213	2.89e-17
21396295	94.4384	13.915	2.75954	3.41e-11		21394045	1999.09	691.325	1.53174	9.55901e-22		21396853	168.897	34.8338	2.279	6.57e-19
21387074	65.768	9.69795	2.76187	1.26e-08		21395287	284.406	98.3836	1.53199	1.10591e-15		21384222	13.2343	2.71411	2.28176	0.024346
21392097	8.85232	1.29184	2.77372	0.0420007		21396174	65.0819	22.5397	1.53234	0.000295347		novel.1242	1022.4	208.214	2.29565	4.92e-59
21386299	758.587	110.342	2.78059	5.24e-74		21408353	2665.47	921.22	1.53272	0.000132854		21395024	188.013	37.8559	2.31252	7.66e-23
112091452	325.247	47.0166	2.78936	4.22e-19		21398724	21.3768	7.40966	1.53306	0.0438967		21396497	44.1612	8.86782	2.31659	4.38e-06
21393677	4431.23	637.214	2.79773	5.52e-87		21390617	149.648	51.7696	1.53357	2.57044e-08		21407301	10.3256	2.05163	2.33374	0.0323781
21393701	11.2264	1.60764	2.79802	0.0376095		21392149	1070.2	368.593	1.53789	1.35902e-27		21404011	15.4594	3.05457	2.33634	0.0132003
21405698	38.4214	5.52839	2.80176	3.33e-05		21392340	137.555	47.3621	1.5392	1.7011e-09		21384507	203.416	40.2626	2.33768	1.64e-24
21394650	9.0331	1.29184	2.80777	0.0412407		21389929	41.1345	14.147	1.54046	0.0020414		novel.995	101.895	20.1105	2.34093	1.23e-12
112093017	59.0987	8.44731	2.81042	7.38e-08		21390542	177.87	61.0893	1.54142	1.16055e-07		21391070	1932.64	379.263	2.34909	1.59e-124
21395172	13.6511	1.95264	2.81309	0.0240549		21403302	228.967	78.4412	1.54394	1.18275e-12		21399477	55.7979	10.9147	2.35429	7.8e-08
112090608	202.9	28.8707	2.81393	8.65e-05		112094712	93.083	31.8517	1.54444	5.04492e-06		21394046	178.061	34.5483	2.36743	1.4e-13
21404011	20.7827	2.89948	2.83648	0.00126042		21396247	1986.88	679.97	1.54694	8.63883e-41		21404769	305.392	58.8852	2.37355	1.94e-31
21401254	16.1374	2.25528	2.84095	0.0151641		21391530	275.397	94.1798	1.54775	4.07531e-13		21386142	21.3062	4.07681	2.3826	0.00171207
21402556	93.1325	12.9647	2.84335	6.14e-11		21395024	108.827	37.2729	1.54794	1.77786e-05		21389359	76.4447	14.643	2.38319	2.17e-10
novel.435	79.3798	10.9789	2.85465	0.035689		21395426	1060.82	362.747	1.54834	1.56034e-34		21391327	78.7371	15.0917	2.38692	1.29e-07
112093729	162.286	22.3515	2.8591	1.01e-22		21403616	669.332	228.854	1.54845	2.68899e-24		novel.275	25.1602	4.76634	2.39903	0.000692042
novel.342	9.37742	1.29184	2.86143	0.0344617		21395349	40.2508	13.7582	1.54866	0.00103909		21399617	1791.46	338.021	2.40595	1.48e-08
21393738	209.391	28.7689	2.86198	5.05e-23		21408962	459.186	156.831	1.5504	1.43145e-20		21390639	198.947	37.2464	2.4189	1.74e-21
21396965	45.9637	6.14853	2.90295	3.8e-07		21403287	229.846	78.3063	1.55395	6.52191e-10		21388550	551.77	102.14	2.43259	6.38e-56
21401750	7739.39	1033.84	2.90424	8.93e-15		21398626	83.7779	28.492	1.55523	1.98242e-06		21408792	1971.3	360.089	2.45269	1.13e-15
21401893	9421.75	1256.04	2.90715	1.1e-20		novel.292	23.7804	8.08681	1.556	0.0285115		21409626	616.05	111.786	2.46215	2.54e-64
novel.197	9.8208	1.30443	2.91963	0.0305626		21404467	85.8568	29.1857	1.55815	3.98116e-06		21397005	138.937	25.1974	2.46218	5.84e-18
21401036	19.8765	2.58711	2.93834	0.00139964		21398929	358.02	121.622	1.55835	3.59861e-18		21410339	115.019	20.9047	2.46347	2.92e-11
21392168	9.98434	1.29642	2.94262	0.0300324		112091004	86.1764	29.3012	1.55837	0.000111033		21399256	582.209	103.516	2.49094	1.79e-56
112091956	27.4672	3.56944	2.94599	0.000305928		21405915	1950.7	662.071	1.55926	3.85703e-25		112093576	9.66825	1.69989	2.50555	0.0313116
21410418	17.5037	2.26787	2.95114	0.00252102		21402812	44.5543	15.0835	1.56148	0.000864235		21387522	290.114	50.7619	2.51434	4.47e-36
112090658	305.14	39.3114	2.95744	1.74e-31		112090610	547.116	185.347	1.56211	1.78988e-21		21408761	1620.82	278.345	2.54142	4.97e-110
21404020	261.003	33.3384	2.96927	2.44e-06		21390101	114.009	38.629	1.56279	2.20511e-06		21404382	102.5	16.9908	2.59026	1.07e-13
21397050	53.9295	6.80362	2.98366	1.58e-07		21400644	746.179	252.544	1.56334	1.08208e-19		21402204	37.0962	6.16887	2.59262	7.41e-06
21399776	521.187	65.7545	2.98599	2.95e-65		21394748	18.9009	6.36793	1.56486	0.0374016		21391883	352.624	57.3021	2.62171	1.38e-33
112094987	181.956	22.9962	2.98645	7.55e-13		21405411	1959.54	662.039	1.5654	1.37512e-33		21387500	404.175	65.6721	2.62192	3.69e-05
21403753	360.805	45.4685	2.98862	5.24e-33		21387238	648.665	219.094	1.56641	6.1507e-16		21404760	36.1117	5.79394	2.63963	4.59e-06
21403649	12.8634	1.61509	2.99626	0.0393908		21402237	11852.5	3994.68	1.56908	4.63349e-78		21394903	2230.23	355.32	2.64971	8.96e-114
21406506	163.914	20.2267	3.0199	0.00302519		21399280	197.354	66.4887	1.56989	1.07628e-11		21396878	558.163	88.865	2.65004	5.79e-64
novel.653	58.3574	7.14174	3.03451	3.21e-09		21410155	389.685	131.23	1.57027	1.24882e-20		21406231	17.0936	2.71144	2.6516	0.00524687
21385828	23.9055	2.92925	3.03841	0.00195994		21391373	185.631	62.4826	1.57086	1.2328e-12		novel.388	12.9179	2.05758	2.6548	0.0159216
21393422	15.9905	1.94405	3.04699	0.04098		112094302	23.9814	8.07081	1.57121	0.0154772		novel.527	54.1714	8.53718	2.6672	1.67e-08
21395290	139.066	16.7882	3.04809	4.06e-19		21400455	800.881	269.461	1.57132	4.52019e-22		21403576	71.5937	11.2459	2.67007	7.41e-11
112093057	351.819	42.141	3.06332	2.13e-20		21390741	723.565	243.262	1.57258	1.37227e-26		21408368	10.9391	1.70316	2.68307	0.0267671
21391036	190.153	22.3331	3.08823	1.19e-25		21407592	20.9425	7.03446	1.57268	0.0188614		21389192	15.5115	2.41468	2.6914	0.0152447
21399657	45.7167	5.20915	3.14079	0.000141325		21385334	930.26	312.774	1.57326	3.78559e-23		21399657	35.4547	5.47666	2.69761	9.31e-05
21386863	389.791	44.0564	3.14563	3.51e-05		21384684	28.0315	9.37953	1.57617	0.0109423		21396074	244.719	37.481	2.70652	4.61e-29
21394921	17.6277	1.96581	3.17548	0.00258763		21398791	121.977	40.8942	1.57725	1.57981e-06		21393914	2257.07	345.588	2.70766	3.45e-157
21404042	164.415	17.7945	3.20961	3.97e-14		21403935	1354.38	453.608	1.57828	1.73851e-23		novel.635	11.2922	1.70256	2.72829	0.0134196
21391032	12.0432	1.29585	3.22053	0.0108669		21388664	811.414	271.42	1.57992	1.45753e-21		21392930	18.0692	2.71351	2.73085	0.00273782
novel.55	12.1126	1.29127	3.22248	0.0128192		21402541	1086.62	363.163	1.58139	1.77174e-19		21386720	3011.45	450.999	2.73924	1.29e-171
112093461	9.15988	0.985192	3.22977	0.0379487		21391099	319.6	106.702	1.58264	5.8643e-14		21389906	351.34	51.857	2.76069	2.61e-38
21389819	18.4341	1.94004	3.24559	0.00112408		21404330	125.865	42.0573	1.58312	4.31201e-06		21384789	2813.72	409.34	2.7814	6.95e-203
novel.388	18.7243	1.95321	3.26872	0.00217048		21387059	1090.49	363.937	1.58355	2.73887e-39		21398388	275.238	39.9837	2.78514	9.36e-33
21409276	172.551	17.8672	3.27249	0.00579006		21395116	2932.11	977.036	1.58558	1.22326e-24		112092159	16.4771	2.38615	2.78721	0.00507985
21410438	287.266	29.5493	3.28423	2.41e-29		21402108	188.455	62.7916	1.58683	4.73656e-12		21388528	23.5542	3.39977	2.7898	0.000233868
112092222	12.6979	1.30901	3.29175	0.00951883		21408278	1494.1	496.984	1.58806	2.87886e-32		21388980	33.5066	4.77971	2.81099	7.86e-06
21391812	31.731	3.23589	3.29807	0.00146698		21387849	151.744	50.375	1.59083	3.37119e-11		novel.649	28.707	4.07146	2.81337	4.08e-05
21398937	73.4541	7.43923	3.30615	1.52e-08		21404550	409.82	136.04	1.5913	1.22834e-10		21383667	19.318	2.73997	2.82212	0.00135394
novel.423	25.8926	2.61802	3.31462	0.000217566		21409320	12447.6	4128.76	1.59207	1.65333e-25		112090472	9.67976	1.37132	2.8244	0.0228747
21395542	36.0286	3.57802	3.33759	7.46e-06		21385648	352.894	116.952	1.59319	2.18414e-15		21391373	451.677	63.4594	2.83187	1.38e-51
21398676	79.3316	7.77107	3.34873	7.82e-12		21392804	68.8948	22.786	1.59591	5.22119e-05		21398841	901.689	124.101	2.8611	2.96e-86
21389789	13.2818	1.30443	3.35883	0.0103499		21405201	274.829	90.883	1.59615	5.81776e-14		112094988	14.8532	2.03112	2.86376	0.00472323
112091451	811.2	78.3691	3.37141	3.94e-17		21405372	1043.61	344.905	1.59691	5.23923e-32		21391884	674.066	91.3361	2.88343	2.55e-57
21407559	63.9472	6.19491	3.37515	1.02e-07		21385827	2917.81	964.354	1.59728	3.95409e-39		novel.76	22.9349	3.05991	2.90319	0.000403752
21405424	131.43	12.5923	3.38045	9.86e-18		21389832	436.155	143.919	1.59957	6.74521e-24		112095180	209.698	27.9112	2.90847	2.59e-22
21406715	164.108	15.5359	3.40139	0.000762776		112093194	350.191	115.516	1.59971	1.25146e-18		21390242	7208.38	959.559	2.90934	2.87e-170
21408973	608.505	56.4941	3.42677	7.36e-42		21388297	1174.03	387.457	1.59978	1.07736e-19		novel.251	18.3858	2.39744	2.94338	0.000756423
21408088	79.7339	7.15033	3.48011	5.94e-13		21409737	486.346	160.021	1.60316	9.11688e-22		21393866	232.719	29.9931	2.95555	1.15e-26
21405555	10.9465	0.976036	3.49967	0.0332291		21390556	1372.9	451.567	1.60473	1.48296e-28		21406626	69.6753	8.86961	2.97423	4.18e-11
21397937	7.45012	0.647639	3.52472	0.0461959		21389364	2854.89	938.526	1.60482	7.69899e-32		21409332	8.05493	1.02284	2.97762	0.0308611
21396652	22.8042	1.92745	3.55373	0.000344821		112092418	15.3021	5.03949	1.60485	0.0427707		novel.491	13.566	1.69394	2.99541	0.00636526
21406884	11.7453	0.980614	3.5936	0.0130173		21406607	76.5956	25.1854	1.60606	1.36806e-05		21402108	509.787	63.7708	2.99906	1.92e-54
21409360	1571.66	129.294	3.60238	1.1e-100		112091771	109.368	35.9227	1.60627	4.25042e-08		112093829	27.4315	3.3965	3.01017	6.75e-05
21407126	8.02932	0.656794	3.61964	0.0434493		21401749	1329.17	436.314	1.60701	0.00375766		21390966	880.308	108.282	3.02246	1.06e-81
21383755	20.2304	1.60306	3.64645	0.000877348		21405438	22.4878	7.3907	1.60728	0.0154578		21404871	609.662	73.2315	3.05696	7.86e-63
112092684	20.4508	1.60707	3.66105	0.00025458		21405028	16.3877	5.37639	1.60823	0.0449304		112091784	34.1219	4.09078	3.06057	9.17e-06
21391720	16.432	1.28783	3.66582	0.00148773		novel.215	44.0581	14.4149	1.61197	0.000369231		21408083	17.1281	2.04302	3.06618	0.00380812
21389576	12.432	0.96344	3.67793	0.00837188		21392485	86.4481	28.2838	1.61244	0.000346904		21404904	23437.8	2651.5	3.14395	4.8e-238
21409332	12.6917	0.972027	3.71164	0.00498257		21407519	274.611	89.8001	1.61298	5.00974e-08		21394737	9.33586	1.02879	3.18795	0.0205766
21411279	210.102	15.8991	3.72728	3.03e-26		21384552	89.2892	29.1582	1.61389	8.60565e-07		112091571	25.1602	2.70816	3.20877	5.15e-05
novel.861	17.3727	1.305	3.74769	0.00267075		21395700	151.211	49.3247	1.61393	4.55714e-07		21403869	30774.2	3305.29	3.21888	1.95e-256
21385416	8.77964	0.648208	3.75427	0.038612		21400487	872.174	284.919	1.61422	4.47827e-15		21387858	16.1381	1.71712	3.2394	0.00138277
21401831	21.8668	1.61165	3.75964	0.000131793		21395182	123.687	40.2986	1.61707	2.48705e-07		novel.23	48.3555	5.1056	3.24199	3.01e-09
novel.357	13.4469	0.967449	3.789	0.00401499		21393745	38.1116	12.366	1.62062	0.00405622		21392443	5441.05	564.225	3.26955	3.37e-225
21404019	13.4703	0.968018	3.79682	0.00458117		21409800	22.7701	7.3907	1.62146	0.015601		21397864	75.7279	7.82298	3.27294	2.92e-13
21388871	9.4148	0.648208	3.86334	0.0235171		21395143	1887.95	613.108	1.62262	7.38384e-06		21408831	480.999	49.7168	3.27323	1.39e-61
21384665	23.7773	1.63741	3.87299	0.00390113		21397872	448.76	145.647	1.62327	6.63087e-21		21412662	179.382	18.3874	3.28502	5.43e-28
21408746	9.44387	0.648208	3.87396	0.0265277		112093312	1840.76	597.332	1.6233	3.23687e-16		21385657	29.964	3.08577	3.28543	6.1e-06
21389639	15.7648	0.976036	4.02414	0.0032504		21399731	338.614	109.702	1.62535	5.80663e-17		21406016	303.365	30.7912	3.30104	4.56e-07
112091597	21.136	1.29585	4.02737	0.000161731		21388661	280.658	90.8683	1.62707	9.11753e-14		21400227	43.8615	4.42589	3.30748	1.36e-08
21391834	5.84565	0.31981	4.06678	0.046198		21397523	257.339	83.1918	1.6282	3.85229e-10		112093190	20.326	2.03707	3.31437	0.000185035
21392971	49.3292	2.91952	4.08014	1.68e-09		novel.362	32.2263	10.4114	1.62905	0.00297927		21408619	139.872	14.0317	3.32112	1.57e-22
21387861	17.2322	0.980614	4.14227	0.000734815		21386765	632.518	204.355	1.63005	1.11381e-22		21400531	10.3265	1.02879	3.33315	0.010652
21395171	11.3961	0.647639	4.14324	0.0203864		112092335	187.281	60.3963	1.63065	2.34157e-07		21393043	704.717	64.7193	3.44405	1.29e-105
21399743	103.331	5.83674	4.1465	1.9e-19		21407316	706.341	227.88	1.63152	1.46057e-33		21385483	69.2966	6.16887	3.4952	9.94e-13
novel.712	17.2784	0.980614	4.15347	0.00740423		21393206	404.604	130.513	1.63212	6.70296e-12		21393353	157.58	13.9422	3.49622	3.65e-26
21400876	6.30429	0.328397	4.17198	0.0403361		21398315	290.007	93.5683	1.6322	3.85271e-12		novel.170	53.2225	4.09345	3.7012	4.26e-10
novel.479	6.47261	0.323819	4.21599	0.0305692		21411729	57.2075	18.4846	1.63268	8.87596e-05		21388561	1153.37	88.3232	3.70718	1.96e-102
21407092	6.56202	0.31981	4.23259	0.0302066		21388919	312.83	100.616	1.63544	9.1614e-09		21402001	13.9109	1.02284	3.76512	0.00617466
112094937	6.76429	0.31981	4.28143	0.0261073		21412210	160.752	51.7137	1.63587	2.70982e-11		21405256	5.15668	0.345803	3.81495	0.0436325
21387858	31.8184	1.63283	4.29241	5.66e-05		21401212	103.258	33.2218	1.63637	3.85805e-07		novel.246	5.15742	0.339857	3.81512	0.0432322
21412279	31.8651	1.62424	4.29565	1.36e-06		21406281	217.915	70.0737	1.63669	2.77581e-09		novel.507	5.16671	0.337184	3.81726	0.0485531
novel.438	50.9989	2.58711	4.29656	1.82e-09		novel.1019	28.1278	9.02086	1.63848	0.0190111		21397006	344.276	23.185	3.89233	1.53e-50
21409631	76.5118	3.88009	4.30338	8.84e-09		21408338	726.058	233.288	1.63873	1.72552e-21		112092299	40.6701	2.73135	3.89766	2.93e-08
21402322	32.7455	1.61967	4.33933	9.94e-07		21383975	86.9465	27.8441	1.64279	2.06181e-06		21405792	5.48811	0.345803	3.90438	0.0371956
112090347	132.189	6.47178	4.34936	6.15e-21		21402976	1153.66	369.171	1.64409	2.02012e-41		21401539	49511.2	3128.74	3.9841	1.26e-99
112093623	7.10238	0.31981	4.35166	0.0264826		21406217	949.538	303.657	1.64486	7.04712e-05		21402783	10.9531	0.674367	4.00942	0.00573851
21401468	7.1273	0.328397	4.35598	0.0203922		21390407	286.874	91.6177	1.64707	4.3364e-18		21408367	6.11399	0.345803	4.06101	0.0265159
21404035	26.7565	1.28726	4.36619	3.12e-05		21396524	26.1894	8.372	1.64731	0.011148		21408084	132.641	7.86428	4.07658	0.00168064
21388377	21.0591	0.96344	4.44034	0.000123423		21393898	16712.8	5325.98	1.64988	5.75016e-35		21392735	1518.8	85.7376	4.1452	7.93e-173
112091457	311.641	13.9019	4.48366	1.72e-34		21389125	188.31	59.8352	1.65316	8.70053e-09		21392837	156.507	8.51607	4.1989	7.47e-27
112090497	108.687	4.82178	4.48745	1.5e-18		21389833	60.0822	19.0882	1.65365	0.000626622		21405822	32.2487	1.7085	4.24114	3.91e-07
112092048	223.005	9.67333	4.52127	4.6e-31		21389594	239.1	75.867	1.65498	2.32015e-15		21385636	679.587	35.4829	4.2603	4.27e-94
21398564	8.05693	0.31981	4.54117	0.0265867		21395995	2184.23	693.184	1.65576	1.89175e-40		21396153	331.606	17.0408	4.28204	1.43e-54
21409465	1272.62	53.014	4.58334	3.26e-126		21405233	15.9449	5.04935	1.65636	0.0416943		21396872	7.42122	0.339857	4.33986	0.0111914
novel.924	4.44002	0	4.63354	0.0370959		21387360	217.23	68.8152	1.65743	6.47638e-15		21411639	3.86635	0	4.36133	0.037472
21385846	1355.71	53.351	4.66532	4.83e-146		21397664	453.66	143.749	1.6585	1.62986e-17		21386143	77863	3600.11	4.43483	6.25e-60
21390062	4.58684	0	4.68849	0.0434228		21396273	155.855	49.3822	1.65859	1.632e-11		21401683	8.0732	0.339857	4.46115	0.00886686
21392332	8.94504	0.328397	4.69074	0.031286		21406331	81.6666	25.8198	1.65947	2.33105e-05		112091483	4.17855	0	4.47385	0.036023
21406016	786.189	29.2501	4.74888	1.9e-09		21390208	1796.3	568.55	1.66	2.19992e-48		21391846	4.18468	0	4.47569	0.0294675
21402991	4.87094	0	4.76336	0.0293915		112093729	73.1523	23.1551	1.66017	2.05833e-06		21394217	4.18468	0	4.47569	0.0294675
21402320	442.537	16.1915	4.77224	2.89e-76		21389155	30.7348	9.74692	1.66097	0.00462179		21395243	4.18626	0	4.47615	0.0297463
21392708	9.96627	0.31981	4.83696	0.00737401		21408652	57.564	18.1349	1.66293	0.0119557		112094872	4.1925	0	4.47795	0.0357148
novel.309	28.0645	0.976605	4.84942	9.09e-06		21404899	153.295	48.2545	1.66596	3.07988e-10		21411924	4.19936	0	4.47995	0.0341446
21404013	5.17508	0	4.85256	0.0237922		21392980	480.398	151.362	1.66637	5.87736e-15		novel.287	16.1205	0.691607	4.56016	0.000602087
21404097	47.7618	1.61566	4.88717	7.48e-07		21397918	190.683	60.0799	1.66687	1.97686e-13		novel.543	8.6992	0.337184	4.56946	0.00575915
21398885	5.42719	0	4.92434	0.0366757		novel.912	23.5081	7.37917	1.66831	0.0196413		21391785	9.36194	0.345803	4.6749	0.00453395
21395937	5.49791	0	4.94056	0.0165213		21407956	72.6496	22.8457	1.66961	4.8441e-05		112093712	4.83285	0	4.68323	0.0173895
21398575	11.0345	0.31981	4.98995	0.00331898		21401643	2265.81	711.64	1.67099	2.87104e-45		21399258	4.83359	0	4.6834	0.0200533
21397392	5.67245	0	4.99198	0.0146017		21394093	634.264	199.011	1.67213	5.25315e-12		112092781	5.159	0	4.77727	0.0118363
21392223	11.1675	0.31981	5.00446	0.00299215		21395678	308.063	96.6141	1.67304	5.13121e-16		112093137	5.16354	0	4.77833	0.011804
112093924	11.2756	0.328397	5.01609	0.00272421		21401730	110.253	34.6246	1.67365	7.66155e-07		novel.924	6.13016	0	5.02595	0.00513621
112093247	11.7792	0.31981	5.08235	0.00299018		21388994	48.2279	15.0958	1.67635	0.00219229		21408971	715.261	20.0965	5.15243	1.33e-110
21412479	528.305	15.5267	5.08643	4.12e-85		21410139	16.0715	5.01848	1.67639	0.0373952		21393268	6.75922	0	5.16744	0.00372721
21410185	6.29807	0	5.13315	0.0111475		21403386	23.6617	7.37508	1.67977	0.00985252		novel.666	6.77158	0	5.16966	0.00348089
novel.666	6.56825	0	5.19585	0.00729006		21407328	449.266	140.134	1.67994	4.48788e-21		21392089	6.78287	0	5.17169	0.00391412
21408411	47.6667	1.29642	5.19945	1.5e-08		21394564	147.48	45.9773	1.68167	2.27857e-10		novel.1161	13.8399	0.339857	5.23952	0.000787349
novel.19	6.6237	0	5.20689	0.00982711		21402291	865.265	269.656	1.68177	1.01217e-33		21407751	7.74716	0	5.36359	0.00171159
novel.1036	6.88484	0	5.26463	0.00548512		21396555	70.1763	21.8813	1.68474	2.81879e-05		112094354	8.38087	0	5.47735	0.000918449
21406113	225.58	5.84075	5.27278	2.1e-38		21407280	63.9145	19.8769	1.68815	4.97699e-05		21387524	8.68695	0	5.52951	0.00097499
21404008	6.97279	0	5.29059	0.00611636		112091016	98.5843	30.582	1.68836	1.13741e-07		novel.628	11.5891	0	5.94523	0.00015956
21408139	29.7944	0.647639	5.51968	2.29e-05		21407727	299.894	92.9914	1.68855	3.71236e-19		21383697	16.1419	0	6.42285	0.0111482
21404844	703.971	15.196	5.53089	2.3e-100		21404876	5503.45	1706.56	1.68939	7.56276e-34		novel.981	35.8005	0.337184	6.61022	8.3e-07
novel.287	33.2888	0.656794	5.67927	7.74e-06		112091261	36.7631	11.4054	1.6898	0.00230858		21398527	20.6176	0	6.77618	2.24e-06
21389157	84.8224	1.6191	5.70894	2.18e-13		21405106	43.4996	13.4485	1.69124	0.00163036		21385501	21.2548	0	6.82018	1.41e-06
21391167	9.37596	0	5.72006	0.00355607		21392066	147.654	45.6585	1.69167	2.6288e-10
21388376	53.1146	0.968018	5.77257	6.3e-09		21399881	6173.25	1908.82	1.69349	1.64036e-37
21401154	187.07	3.2273	5.85115	1.66e-27		112090347	21.7423	6.70779	1.69392	0.0100902
21392098	42.4028	0.656794	6.02955	7.79e-07		21407178	416.218	128.532	1.69489	1.28105e-22
21408796	596.78	8.45018	6.1459	1.12e-81		21399981	631.134	194.623	1.69639	1.69017e-22
21409604	25.3314	0.31981	6.1835	2.55e-05		21408204	459.486	141.787	1.69691	2.87465e-23
112094260	13.2909	0	6.22092	0.000134381		novel.68	14.1651	4.35938	1.69749	0.0485197
21385258	13.3665	0	6.22276	9.98e-05		21385181	195.006	60.1322	1.69789	5.52274e-08
21396574	14.826	0	6.38062	0.00031362		21391750	684.862	211.195	1.69802	1.2291e-25
21407252	16.2513	0	6.50319	3.62e-05		novel.627	252.825	77.8779	1.69806	5.48507e-07
112090601	16.4091	0	6.52354	2.53e-05		21395050	1270.5	391.421	1.69849	1.06239e-29
21395243	22.3074	0	6.96452	2.53e-06		21392028	2583.05	795.516	1.69933	2.80068e-37
						21393538	1439.17	443.183	1.69944	2.9263e-30
						21389893	1870.43	575.353	1.70082	1.29534e-45
						21389359	46.9624	14.4207	1.70171	0.000111308
						21405424	42.5482	13.0465	1.70181	0.00161308
						21396538	8344.79	2564.27	1.70241	3.8856e-57
						21400070	177.413	54.3925	1.70483	5.80885e-13
						21406128	1426.65	437.545	1.70521	4.9547e-55
						21393216	155.392	47.7003	1.70525	1.60005e-09
						21384912	100.678	30.8983	1.70543	1.38468e-06
						112093823	558.416	171.005	1.70824	2.35025e-25
						21394761	687.732	210.257	1.70871	1.02808e-23
						21385564	13052.2	3993.03	1.70875	2.4848e-31
						21387926	27.5219	8.43206	1.70914	0.0113596
						21390361	78.1251	23.8175	1.71053	5.49604e-05
						21396366	244.252	74.3953	1.71447	7.20812e-15
						21409601	760.971	231.621	1.716	0.00502765
						21405413	1364.52	413.373	1.72278	8.4276e-46
						21387340	21.0776	6.38931	1.72586	0.016612
						21398267	1476.8	445.998	1.72739	1.30585e-29
						21392267	630.652	190.369	1.72819	1.80643e-26
						21407307	470.617	141.908	1.72883	5.88852e-18
						21401639	4715.62	1422.12	1.72941	9.80238e-50
						21388711	383.026	115.422	1.73034	5.08391e-19
						21397599	33.3662	10.0794	1.73065	0.0018215
						21402193	280.602	84.5294	1.73083	1.20647e-19
						21400708	2042.52	615.256	1.73123	2.20367e-38
						21393843	36.816	11.0709	1.73182	0.000545574
						21389628	351.384	105.773	1.73293	4.45107e-20
						21402647	3443.85	1035.95	1.73303	2.20267e-41
						21409364	778.481	233.994	1.73431	3.76894e-32
						21387297	208.817	62.7661	1.73464	3.47146e-16
						21393914	1132.98	340.269	1.73592	2.17328e-24
						21397725	426.487	127.914	1.73753	1.86269e-17
						21393395	3219.19	965.119	1.738	9.98117e-52
						21397165	951.247	284.96	1.73947	6.53282e-23
						21399987	943.391	282.588	1.73951	3.35162e-29
						21407807	66.2558	19.8382	1.74179	4.69038e-06
						21396722	253.617	75.4523	1.74869	5.22916e-12
						21396636	190.821	56.6784	1.75011	6.05581e-13
						21405432	40.7415	12.0933	1.75417	0.000309288
						112091539	36.2585	10.7253	1.75449	0.00141032
						21390608	3689.96	1093.06	1.75541	2.0735e-57
						112094014	297.179	87.9194	1.75738	6.88954e-16
						21384011	77.3172	22.8744	1.75785	0.000142475
						21409230	1767.15	521.576	1.76026	2.6438e-36
						21393118	426.666	125.857	1.76119	9.5345e-26
						21404147	93.3662	27.5018	1.76133	1.89993e-06
						21391156	42.1208	12.42	1.76419	0.00147433
						21386587	719.607	211.873	1.76419	6.88616e-20
						21396665	90.5448	26.5205	1.77206	1.67343e-08
						21398473	93920.5	27466	1.7738	3.69671e-57
						21391782	277.833	81.2472	1.77395	4.30209e-11
						21401126	480.653	140.298	1.7772	8.37954e-21
						112093633	1375.71	401.212	1.77775	3.79329e-26
						21388441	145.968	42.5864	1.77808	1.94629e-09
						21409770	56.3647	16.4428	1.77858	1.62069e-05
						21386318	2519.56	733.614	1.78024	1.2634e-51
						21412718	140.849	41.005	1.78086	2.61706e-09
						21407038	6118.69	1780.37	1.78103	4.73171e-51
						21386949	220.427	64.0704	1.78207	1.04758e-15
						21399679	643.446	187.008	1.78325	4.76421e-31
						novel.417	15.0433	4.36514	1.7856	0.026591
						21396684	650.948	188.83	1.78591	2.38645e-20
						21410031	737.624	213.861	1.78697	2.79784e-22
						21389830	61.5334	17.812	1.79098	6.01628e-06
						21397781	47.6525	13.7525	1.7912	7.28691e-05
						112095293	103.556	29.9369	1.7922	3.97456e-08
						21405903	741.42	214.091	1.7923	7.1223e-15
						21392795	682.777	197.078	1.79311	6.56543e-28
						21397646	396.27	114.32	1.79319	6.38087e-22
						21392638	106.325	30.6375	1.79429	3.4504e-05
						21392247	25.7491	7.40557	1.79525	0.0220648
						112090757	24.4551	7.05175	1.79554	0.00555965
						21400677	12.8257	3.68428	1.79655	0.0462244
						21388986	268.509	77.2834	1.79789	9.43854e-16
						112095062	94.4054	27.1677	1.79792	1.18645e-07
						21389612	51.3691	14.7909	1.79879	0.000127779
						21396820	314.144	90.2824	1.79914	2.64047e-20
						21397120	14.0459	4.02452	1.80331	0.0374307
						21399528	940.751	268.93	1.80719	4.5143e-26
						21395666	457.293	130.623	1.80777	2.79258e-20
						novel.599	15.2936	4.38243	1.80799	0.0304454
						21402641	28.1552	8.01037	1.80802	0.0116241
						21390809	1768.05	504.744	1.80875	7.28774e-65
						21390662	118.715	33.8721	1.81031	8.57423e-09
						21404734	891.447	254.209	1.81043	1.21707e-36
						21389777	311.39	88.6854	1.81093	1.48754e-10
						21391070	1311.3	373.456	1.81231	4.74557e-36
						21406468	405.936	115.165	1.81806	1.21635e-27
						21406221	366.3	103.772	1.82064	1.15711e-20
						21407470	265.555	75.1848	1.82093	2.94257e-17
						112094983	104.407	29.5267	1.82189	1.8989e-09
						21402711	2701.58	764.062	1.82217	4.88837e-33
						112094177	16.7128	4.73254	1.82446	0.0330415
						21405271	196.205	55.3607	1.82506	2.37961e-13
						112092354	13.0536	3.67852	1.82553	0.0405639
						21406004	54.8403	15.4978	1.82613	6.4335e-05
						21386723	73.871	20.8277	1.82737	1.68674e-06
						21409259	26.2438	7.3747	1.8296	0.00218975
						21395743	59.5946	16.7477	1.82982	1.93777e-05
						21385083	118.283	33.2764	1.83101	1.20356e-09
						21395885	71.7775	20.1472	1.83283	4.45052e-07
						21407018	747.075	209.625	1.83332	5.22054e-29
						21390513	50.2506	14.108	1.83419	1.78545e-05
						21396462	4945.5	1385.44	1.83583	2.30988e-39
						21407748	382.161	107.046	1.83629	7.98474e-27
						21398677	47.8575	13.4028	1.83646	0.000296059
						21396445	54.0025	15.1019	1.83822	1.23944e-05
						21399849	262.924	73.491	1.83911	1.24015e-20
						21407567	24570.9	6861.68	1.84034	9.81184e-37
						112092035	120.125	33.5176	1.84069	1.13227e-09
						21401743	16.9238	4.71691	1.84209	0.0368966
						21403954	695.812	194.055	1.84253	6.68155e-31
						21397062	839.163	233.754	1.8445	3.22385e-44
						21404004	121.771	33.8206	1.847	6.74243e-08
						21387138	72.7803	20.1768	1.85164	1.39823e-06
						21402603	135.929	37.5951	1.85344	7.23003e-12
						21396977	801.698	221.436	1.85594	2.82972e-28
						21406467	13.3393	3.68261	1.8569	0.0440005
						21394867	353.853	97.5759	1.85798	5.03796e-24
						21409470	4808.49	1324.9	1.85984	1.30778e-28
						21408486	33.0585	9.11254	1.86	0.0131385
						21401429	157.497	43.3257	1.86136	6.34397e-12
						21410286	317.166	87.1208	1.86326	3.36201e-16
						112092891	58.5779	16.0795	1.86392	2.12341e-05
						21408911	440.805	121.085	1.86427	1.8625e-19
						21396554	116.102	31.8405	1.86504	9.06304e-10
						21387774	1000.83	274.027	1.86944	2.48123e-41
						21383776	45.4225	12.4397	1.87202	0.000105106
						21410297	222.902	60.818	1.87491	9.64424e-14
						21389156	294.39	80.3007	1.87518	1.68523e-16
						21386068	29.5869	8.03175	1.87538	0.0349324
						21397444	1181.77	322.04	1.87574	9.22904e-05
						21399851	19.7701	5.37601	1.87731	0.00766402
						21399478	74.1486	20.1641	1.88092	2.39147e-06
						21387500	238.462	64.6381	1.88351	0.0209317
						21396978	37.1935	10.097	1.88388	0.000460054
						21410934	89.2064	24.173	1.88438	4.15287e-08
						21396404	477.073	129.159	1.88507	1.43176e-12
						21410055	85.6618	23.1934	1.88626	3.13042e-08
						21404583	231.945	62.7464	1.88644	1.26985e-17
						112092735	566.354	152.927	1.88828	5.27833e-35
						21393867	2106.55	568.972	1.88861	8.52858e-68
						21407938	380.542	102.804	1.88897	6.17654e-15
						21394859	20314.4	5483.98	1.88918	2.11118e-101
						21395807	37.4393	10.1061	1.89262	0.00147433
						21398782	481.166	129.173	1.89776	7.10006e-22
						21412217	120.116	32.1914	1.89856	1.66999e-06
						21397104	346.738	92.9285	1.90032	1.71983e-20
						21405210	496.678	132.93	1.9014	7.19217e-22
						21396900	37.6792	10.1069	1.90276	0.00554432
						21411206	77.8308	20.7879	1.90307	4.87579e-07
						21392509	218.481	58.3666	1.90436	6.53882e-11
						21404777	2823.5	754.216	1.9046	1.2601e-29
						21398309	596.219	159.149	1.90569	1.20075e-27
						21410015	14547.6	3881.17	1.90622	4.90676e-92
						21384272	62.9047	16.8085	1.90632	1.63722e-06
						21399997	143.269	38.1831	1.90635	1.62635e-09
						21410370	6126.33	1634.23	1.90647	2.22251e-78
						novel.275	17.6174	4.69515	1.90809	0.0221326
						21404585	305.405	81.2521	1.91093	9.5922e-15
						112093229	102.165	27.1874	1.91148	2.43922e-09
						21409868	987.452	262.398	1.91179	8.97572e-32
						21388389	622.902	165.522	1.91218	1.91743e-32
						21406237	62.234	16.4489	1.91959	6.14916e-07
						21396650	11.4284	3.02146	1.92031	0.0403586
						21398953	95.2936	25.1937	1.92169	3.59642e-07
						112090540	396.092	104.399	1.92321	2.69887e-14
						21405641	604.397	159.053	1.92604	2.64009e-23
						21393691	451.441	118.714	1.92704	2.94253e-18
						21389623	5032.5	1321.8	1.92879	5.90268e-43
						21396943	81.9358	21.5094	1.92908	3.39939e-07
						21408667	429.619	112.824	1.92968	2.06643e-27
						21388309	194.576	51.0453	1.93136	2.81444e-11
						21407736	599.249	156.655	1.93544	4.51448e-24
						21391685	296.221	77.4493	1.93559	2.14572e-19
						21392897	1641.17	428.651	1.9367	1.80844e-78
						21402235	881.697	230.316	1.93712	2.3878e-45
						21395326	413.574	107.734	1.94032	5.44132e-33
						112090331	25.7516	6.71022	1.94109	0.00337096
						21391881	946.929	246.311	1.94266	4.53124e-50
						21392137	979.019	254.501	1.94399	6.84065e-44
						112091148	1264.15	328.495	1.9443	2.78344e-48
						21408691	242.654	62.9613	1.94557	8.11118e-09
						21387666	190.61	49.3128	1.95023	8.64128e-12
						21388681	33.6714	8.70238	1.95054	0.000952678
						21412056	250.344	64.7702	1.95097	6.38535e-17
						21408490	89.5364	23.1493	1.95164	2.56923e-08
						112091868	671.999	173.478	1.95458	4.67994e-19
						21390312	49.6508	12.7691	1.95799	0.00159181
						21389034	380.868	98.0833	1.95801	5.08146e-26
						21404128	83.8787	21.5505	1.95896	0.000202927
						21407304	155.928	39.9004	1.96651	1.08782e-11
						21400575	8448.55	2160.9	1.96714	2.20367e-38
						21405292	853.634	218.294	1.96717	2.06348e-27
						21395482	445.503	113.709	1.97022	1.79506e-16
						21387041	9463.13	2411.88	1.97223	3.60261e-71
						21391168	23.7674	6.04869	1.97253	0.00269489
						21408100	114.572	29.1931	1.97299	2.8495e-09
						21389178	2101.6	534.953	1.97424	8.46433e-31
						21404657	963.804	245.215	1.97474	1.12312e-49
						21393106	196.956	50.0591	1.97645	1.94586e-13
						21390391	143.995	36.6184	1.97659	2.50428e-09
						21390673	1970.28	500.369	1.97734	8.54116e-39
						21405446	64.9507	16.4424	1.9814	3.74888e-05
						112091520	809.667	205.037	1.98177	2.68494e-30
						21390180	78.2702	19.7724	1.98293	5.84986e-07
						21389828	38.4601	9.74859	1.98414	0.00043164
						112090812	38.5194	9.70248	1.98947	0.00251425
						21394822	158.984	39.9666	1.99248	6.09784e-12
						21399328	387.923	97.0925	1.99934	3.51319e-28
						112092610	48.4743	12.1056	2.00078	2.10068e-05
						21403690	6738.16	1683.38	2.001	5.62869e-55
						21403466	6137.61	1533.17	2.00127	1.0486e-60
						21384539	114.613	28.497	2.00714	3.7184e-09
						21399277	893.837	222.056	2.00858	3.68704e-38
						21411244	39.2495	9.76254	2.00964	0.000136682
						21409689	847.991	209.946	2.01421	4.13461e-32
						21405397	506.112	125.263	2.01489	9.63535e-23
						21408166	33.9208	8.3839	2.01694	0.000174111
						21394077	1993.61	492.544	2.01736	1.106e-53
						21390150	73.452	18.1254	2.01828	6.35314e-08
						21411741	39.5357	9.70582	2.02236	0.000114993
						21388612	417.372	102.514	2.02648	9.72111e-22
						21403576	45.1971	11.0746	2.02668	3.70718e-05
						21403304	124.49	30.5409	2.02689	5.35031e-13
						21408856	106.977	26.163	2.03278	1.3774e-09
						21400578	854.216	208.543	2.03423	2.44419e-24
						21406742	760.008	185.552	2.03424	1.4209e-48
						21392017	23.3311	5.70473	2.03458	0.00423707
						21412031	30.4086	7.43347	2.03539	0.0150248
						21392640	66.0733	16.0832	2.03602	2.63426e-07
						21412738	20.6612	5.0222	2.03795	0.00375766
						21393351	230.506	56.1448	2.03816	7.33384e-18
						novel.975	37.2463	9.07053	2.03902	0.000137852
						21384139	16.5712	4.0381	2.0408	0.0155271
						21383913	55.3455	13.4139	2.04114	1.15144e-05
						21395844	139.568	33.8536	2.04351	6.80049e-11
						21393003	3222.02	779.26	2.04801	4.59089e-44
						21385289	163.783	39.6122	2.04902	4.26306e-14
						21402346	279.82	67.4436	2.05205	3.62403e-17
						112092199	11.1123	2.67136	2.05302	0.0424793
						21410421	48.9461	11.753	2.05493	0.000123095
						21384222	11.1387	2.67341	2.05508	0.0384501
						21389624	882.257	212.072	2.05623	6.58396e-31
						21395363	170.545	40.9494	2.05778	1.54917e-14
						21409743	102.305	24.5132	2.06186	2.09329e-09
						21396497	36.4739	8.73029	2.0619	0.000115136
						21386336	15247.2	3647.44	2.06363	4.85778e-42
						21403001	50.5932	12.0777	2.06705	5.49536e-06
						21411796	136.558	32.6017	2.06713	5.70298e-10
						21406465	1024.54	243.997	2.07018	3.22176e-61
						112093805	36.5786	8.69457	2.07087	0.000311335
						21384789	1694.48	403.04	2.07231	7.92354e-47
						21406349	3180.28	753.534	2.07746	2.05955e-25
						112091658	15.5394	3.68466	2.07781	0.0212697
						21398388	166.065	39.3646	2.07862	4.62412e-15
						21402425	85.2952	20.1509	2.08056	1.63363e-05
						21394028	866.932	204.284	2.08475	2.14086e-49
						novel.944	20.0374	4.7091	2.0897	0.00392716
						21403101	234.532	55.0253	2.09087	7.78003e-21
						21405851	1445.11	338.708	2.09331	2.40566e-76
						21407721	536.755	125.683	2.09539	6.98805e-36
						21401450	2023.03	471.089	2.10237	9.73102e-88
						21390231	658.483	153.324	2.10293	3.58744e-33
						21392301	64.838	15.0859	2.10457	4.82533e-05
						21389911	132.998	30.8988	2.10492	8.79491e-12
						21392687	1733.57	400.859	2.11263	1.15431e-29
						21394262	71.1791	16.3548	2.11935	2.3896e-05
						112091805	80.1651	18.43	2.1209	7.35048e-09
						21388571	68.6439	15.7545	2.12403	1.20394e-07
						21385919	5904.32	1354.2	2.1244	1.53989e-43
						21400186	5857.82	1342.98	2.12486	4.13591e-96
						novel.1143	35.1969	8.06338	2.12973	0.000483736
						21406470	236.47	53.9972	2.13037	4.44064e-21
						21387111	358.343	81.8164	2.1304	1.57276e-23
						21408662	20.5735	4.70334	2.13046	0.00335714
						21404119	495.856	113.127	2.13266	3.13927e-33
						21387571	73.6001	16.7708	2.13344	2.36888e-07
						21386413	1278.6	290.992	2.13523	5.23508e-30
						21392414	103.345	23.499	2.13716	3.99647e-12
						112095034	7419.18	1683.76	2.13964	9.8169e-70
						21396629	159.716	36.2494	2.14051	5.52037e-16
						112093829	14.8239	3.34441	2.14374	0.0200468
						21402419	1833.75	414.647	2.14504	5.56312e-50
						21386769	38.8371	8.76896	2.14892	0.000114121
						21389906	226.533	51.0596	2.15009	9.88697e-16
						21389771	917.566	206.576	2.15074	1.85781e-29
						21409995	523.71	117.639	2.15356	1.30729e-30
						21400143	273.264	61.3587	2.15482	2.99826e-18
						21406458	20.8851	4.68233	2.15551	0.00823988
						21394384	302.615	67.8936	2.15618	5.22796e-24
						112090328	982.293	220.148	2.15761	3.04391e-45
						21386242	135.989	30.2204	2.1689	2.96663e-12
						21410510	234.139	51.9788	2.16993	4.08045e-19
						21385652	359.484	79.8266	2.1704	6.51725e-26
						21411857	80.1275	17.8231	2.17065	1.27596e-05
						21393131	426.695	94.6286	2.17305	9.37068e-35
						novel.23	22.7167	5.02796	2.17687	0.00442653
						21395691	243.076	53.6917	2.17935	9.07051e-16
						21408030	164.615	36.1845	2.18426	1.69795e-13
						21391533	1464.97	321.952	2.1858	1.52409e-55
						21389668	59.5028	13.0852	2.18742	3.44003e-06
						21404325	162.44	35.5358	2.19183	6.34187e-12
						21411994	53.5552	11.7045	2.19212	1.48317e-05
						112094893	29.0987	6.35026	2.19323	0.000592068
						21397543	479.026	104.76	2.19369	1.08186e-21
						21402933	1656.37	361.608	2.19551	3.89856e-38
						21385386	10.7477	2.34674	2.19595	0.0319028
						21391947	38.515	8.37238	2.20077	3.07171e-05
						21398714	183.517	39.9336	2.20118	5.19053e-15
						112091785	35.5384	7.70713	2.20219	5.54831e-05
						21407750	5535.45	1202.83	2.20237	2.63546e-54
						21389126	398.706	86.5972	2.20237	2.26827e-20
						112091789	48.0031	10.427	2.20314	7.62073e-06
						21386461	18.6321	4.02081	2.21128	0.00429989
						21403259	14.0415	3.02146	2.21724	0.0133273
						21399256	474.828	101.935	2.21882	1.02018e-37
						21396417	282.696	60.6685	2.2196	6.48068e-15
						21401699	3143.94	669.373	2.23188	1.05357e-111
						21405070	490.21	104.069	2.2361	8.70978e-38
						21401487	180.259	38.2769	2.2363	2.60065e-18
						21407265	385.752	81.8712	2.23664	2.54516e-16
						21384838	301.155	63.2137	2.25282	5.43017e-26
						21388604	228.952	48.0632	2.25309	4.67042e-14
						21390639	175.183	36.6698	2.25643	5.08881e-15
						21409781	1203.4	251.853	2.25702	8.37503e-43
						21394046	162.947	34.0086	2.26038	2.10316e-10
						21408216	195.086	40.5377	2.26598	4.89126e-16
						21407886	247.696	51.3693	2.27014	8.9741e-24
						21394607	199.203	41.2662	2.27193	1.37945e-16
						112094908	110.777	22.8756	2.27754	9.81521e-11
						21394718	11.4593	2.35865	2.28339	0.0304031
						21407505	358.609	73.5708	2.28634	1.1445e-31
						21396666	83.4662	17.0768	2.28734	6.86667e-10
						21383667	13.1813	2.69684	2.2906	0.0170351
						112094927	11.5566	2.35046	2.29571	0.0327687
						21384669	189.912	38.6606	2.29845	5.91973e-16
						21409157	892.074	181.203	2.29962	2.76097e-48
						112093038	97.6587	19.7917	2.30214	6.95887e-11
						21400227	21.5304	4.359	2.3045	0.00127809
						21404112	188.045	38.0097	2.3084	1.79506e-16
						novel.783	13.3039	2.68289	2.31147	0.026096
						112091518	176.373	35.2192	2.32336	5.71036e-13
						21392103	1569.13	313.158	2.32508	2.17401e-58
						21391025	3277.93	653.916	2.32561	1.95118e-11
						21405846	315.29	62.7539	2.32892	1.51926e-26
						21399912	64.1798	12.7433	2.33154	1.40484e-08
						21400185	13.63	2.71042	2.3332	0.0270435
						112091806	2302.03	456.133	2.33557	3.8729e-63
						21393478	42.5866	8.42296	2.34059	1.31659e-05
						21388824	192.963	37.8995	2.34889	3.23655e-13
						21407922	22.247	4.35733	2.35109	0.0010607
						21400666	568.221	111.059	2.35525	4.74585e-40
						21384081	25.7127	5.0222	2.35563	0.00183878
						21396442	10.299	2.01226	2.35962	0.0370685
						112094196	25.8688	5.0432	2.36265	0.001549
						21397575	1028.56	199.716	2.3647	1.88246e-48
						21410103	502.391	96.9703	2.37329	1.8776e-21
						21399578	278.087	53.3924	2.38155	6.66821e-31
						21395277	17.5211	3.33827	2.38513	0.00596099
						novel.527	43.9091	8.40529	2.3862	1.56931e-06
						21391999	123.57	23.5418	2.39056	2.03903e-07
						21387522	262.418	49.9862	2.39108	1.07215e-28
						21393313	3928.67	746.858	2.39523	9.04043e-80
						21396325	144.621	27.4746	2.39551	3.68846e-12
						112091766	237.703	45.0139	2.40202	1.92939e-23
						21388550	531.779	100.583	2.40245	3.05882e-36
						112092842	21.3304	4.01504	2.40261	0.00256733
						112091571	14.2095	2.66765	2.40566	0.0137494
						21385705	204.34	38.5517	2.40582	6.63264e-20
						21407559	34.1008	6.41441	2.41408	0.000183794
						21411203	457.788	85.6184	2.41896	4.32942e-48
						21403305	469.162	87.4095	2.4232	8.42017e-31
						21407538	1448.88	269.776	2.42514	6.08759e-49
						21400665	10.8759	2.01636	2.43044	0.0283523
						112091274	12.7259	2.34469	2.43403	0.030556
						21401458	96.6624	17.8494	2.43891	4.66389e-09
						21395946	1802.48	331.142	2.44448	8.9933e-65
						21384167	36.5213	6.70407	2.44561	1.50117e-05
						21401496	1232.6	225.915	2.4478	3.17449e-59
						21384681	11.008	2.0065	2.44786	0.0282591
						21394857	3279.19	597.455	2.45653	3.9549e-129
						21407271	173.414	31.5419	2.45917	1.28374e-19
						21389080	869.021	157.005	2.4687	8.8336e-64
						21404773	223.361	40.3247	2.46955	2.63074e-17
						21390992	80419.6	14518.6	2.46965	6.97535e-109
						112095381	13.0401	2.34302	2.4753	0.0111656
						112093372	33.6315	6.05855	2.47573	3.5874e-05
						21396074	206.014	36.9055	2.48102	1.57308e-20
						21399556	127.876	22.8284	2.48666	6.22043e-14
						21392599	96.8924	17.1121	2.5003	1.82785e-11
						21395738	766.717	135.122	2.50457	8.06844e-39
						21403393	135.646	23.861	2.50672	4.11607e-10
						21393840	97.5999	17.0961	2.51288	3.13435e-12
						21402435	2284.54	399.786	2.51473	2.67153e-45
						21409365	97.8258	17.104	2.51686	9.66864e-12
						21390262	71.2115	12.403	2.5209	1.26935e-09
						21410016	537.006	93.2115	2.52621	2.81979e-41
						novel.76	17.6657	3.01365	2.54943	0.00198654
						21386589	278.773	47.5606	2.54977	1.01641e-25
						21399168	44764.7	7638.43	2.55103	1.35833e-58
						21399477	63.0403	10.7479	2.55446	2.24791e-08
						21392711	107.453	18.0557	2.57158	4.78645e-08
						21404684	401.635	67.4966	2.57295	1.93046e-44
						21397005	147.658	24.8148	2.57334	1.86957e-12
						21385551	16.0182	2.68327	2.57736	0.00322599
						21393314	47.9726	8.01651	2.57843	1.04085e-05
						21399797	317.753	53.0069	2.58309	7.37866e-37
						21389559	10.1329	1.68392	2.59241	0.0248924
						21384636	489.151	80.6073	2.6014	6.50843e-53
						21391486	763.456	125.512	2.60414	3.23448e-32
						21385288	306.064	49.9394	2.61518	3.81015e-26
						112090278	28.8304	4.684	2.61874	7.6626e-05
						21385483	37.3181	6.07212	2.62288	0.000153203
						21386511	14.4997	2.33688	2.62758	0.010516
						21383947	22.9142	3.69004	2.63401	0.000452958
						21396880	81.5998	13.0679	2.63993	7.73293e-11
						21399072	202.971	32.5363	2.64135	2.10892e-15
						112093785	16.7387	2.66931	2.6431	0.00430807
						novel.304	16.9502	2.69851	2.65166	0.0115504
						21400109	2491.67	396.266	2.65261	1.03669e-81
						21400146	16.9651	2.68698	2.65317	0.0155215
						21394008	852.863	135.419	2.65546	1.32643e-49
						21396916	8.52969	1.35521	2.6614	0.039619
						21385557	72.2478	11.4132	2.66448	2.8933e-09
						21390211	85.237	13.4464	2.66709	1.11418e-09
						21390966	678.264	106.617	2.6693	1.13984e-25
						112095171	49.1495	7.69151	2.67243	1.68825e-07
						112091870	27.9169	4.36886	2.6759	8.25307e-05
						21388974	88.2221	13.7755	2.68169	3.87982e-11
						21403399	668.575	104.009	2.68541	3.82098e-31
						21407301	13.0012	2.02007	2.69047	0.0118717
						21402370	794.12	122.019	2.70162	1.03292e-52
						21394326	465.996	71.4509	2.70542	2.87309e-38
						21410403	993.248	151.668	2.71129	5.09549e-88
						21386281	162.382	24.7514	2.71138	3.29562e-17
						112094299	437.366	66.7691	2.71146	2.22106e-26
						112090472	8.81044	1.34944	2.71209	0.0338602
						21410705	130.285	19.8185	2.71843	2.35252e-13
						21392443	3690.88	555.547	2.73208	1.51438e-93
						21407320	20.0668	3.01775	2.73527	0.00103673
						112093953	434.523	65.0625	2.73912	1.04829e-33
						21396633	557.246	82.9352	2.74878	5.30684e-41
						21383755	11.2798	1.66421	2.75057	0.0193904
						21384315	1637.48	240.754	2.7662	4.11697e-90
						21411130	13.7163	2.01226	2.76884	0.00649551
						novel.1119	13.7876	2.02417	2.77163	0.00655796
						112094999	20.8024	3.05642	2.77362	0.0030625
						21412662	124.629	18.1057	2.78233	1.70784e-18
						21391884	619.496	89.9333	2.78467	3.65315e-39
						21389405	352.066	50.9781	2.78762	7.1537e-25
						novel.1242	1435.14	205.006	2.80757	2.11062e-46
						21393685	1856.9	264.524	2.81174	1.3627e-63
						21391879	56.9018	8.063	2.8186	5.73071e-09
						21405415	2022.99	283.621	2.83482	6.8774e-76
						21403430	244.372	34.2001	2.83678	4.08795e-23
						112094284	55.1968	7.70304	2.8397	8.18962e-09
						112094686	31.8782	4.35119	2.87219	1.38655e-05
						novel.524	205.071	27.9014	2.8778	0.00113244
						21401679	14.9316	2.01264	2.88546	0.0198191
						21399844	683.158	91.8938	2.89329	5.59506e-57
						21391354	1430.33	191.948	2.89779	6.28936e-67
						21402937	1823.65	244.362	2.89999	7.61565e-119
						21400171	243.389	32.5874	2.90017	2.09247e-16
						21407637	78.0079	10.4196	2.90353	5.47572e-10
						21395785	131.038	17.4914	2.90733	1.2885e-17
						21388561	658.195	86.9641	2.92053	5.33841e-50
						21410459	231.837	30.5582	2.92296	6.44917e-22
						21394296	15.2447	2.01021	2.92351	0.00367037
						21391966	40.8961	5.35091	2.93089	4.61735e-07
						21407103	791.106	103.751	2.93096	3.2402e-37
						21397142	53.8959	7.07184	2.93317	3.64684e-08
						21403544	100.227	13.1189	2.93556	4.4861e-12
						novel.1208	318.799	41.3097	2.94876	6.11451e-42
						21393554	72.4311	9.34958	2.95051	6.21243e-07
						21383830	10.5902	1.34163	2.97671	0.0110834
						21410168	647.945	82.1276	2.97943	7.31293e-63
						21397440	8.02804	1.0092	2.9984	0.0399069
						novel.309	8.11678	1.01292	3.01008	0.0320895
						21404035	10.837	1.33382	3.01122	0.030145
						112090581	60.0992	7.42528	3.02189	5.21315e-09
						21393353	112.548	13.7307	3.03198	7.91398e-14
						novel.357	8.24893	1.00139	3.03456	0.0269554
						21402336	980.426	119.064	3.04151	3.40723e-38
						112095076	11827.8	1435.51	3.04252	1.88722e-179
						21388569	58.0323	7.01065	3.04681	2.78854e-07
						21391883	466.877	56.4157	3.04978	4.87294e-38
						21397367	8.38007	1.00511	3.0617	0.0334752
						21385910	2631.57	314.728	3.06372	9.65391e-55
						21384400	8.47186	1.0092	3.07205	0.0473465
						novel.233	22.8095	2.68903	3.08319	0.000150105
						21407004	3225.96	378.724	3.09055	2.54224e-54
						21387083	83.1147	9.75549	3.09177	2.06383e-09
						21403216	34.4294	4.02695	3.09751	3.64828e-06
						novel.251	20.2174	2.36032	3.10391	0.000320813
						21386142	35.347	4.01504	3.1374	2.06723e-06
						21391814	8.95653	1.02073	3.14237	0.0310035
						21383826	29.9723	3.38514	3.15464	3.64689e-05
						21389728	24.091	2.68494	3.16686	6.80217e-05
						21390242	8545.5	944.78	3.17724	6.09348e-126
						21407102	33.7901	3.69619	3.19292	1.04212e-06
						21397006	209.201	22.8284	3.19643	8.89159e-21
						21399996	58.4391	6.37703	3.19648	1.78221e-09
						novel.1241	9.21935	0.999343	3.19651	0.0171248
						21408604	20122.8	2166.72	3.21531	1.0674e-122
						112091795	89.3126	9.39553	3.24784	5.86777e-14
						21411019	35.2472	3.68633	3.25645	4.86264e-07
						21397612	269.458	28.204	3.2573	5.16055e-35
						21384611	129.155	13.4234	3.2663	4.26887e-19
						112094561	255.502	26.5056	3.26892	4.10496e-37
						21404904	25386.8	2610.75	3.28155	3.61179e-73
						21403869	31654.1	3254.42	3.28194	3.66399e-102
						21389789	13.1109	1.34944	3.28503	0.00312855
						novel.853	9.81225	1.00139	3.28712	0.011272
						21388514	105.129	10.7677	3.28884	1.03984e-17
						21404681	915.933	93.2082	3.29581	2.06695e-78
						112094942	49.5086	5.02462	3.29973	9.31188e-08
						21386156	9.97532	1.00139	3.3069	0.0131676
						novel.180	10.3164	1.01497	3.35685	0.0115655
						novel.832	6.89605	0.664864	3.36417	0.0405223
						112091784	41.5279	4.02695	3.3663	7.20344e-08
						21412216	211.765	20.4813	3.3706	8.144e-29
						21393555	114.926	11.1157	3.37393	4.70937e-19
						21403525	204.503	19.4585	3.39284	1.03318e-34
						21386720	4807.11	444.085	3.43631	5.90386e-78
						21386612	230.757	21.1305	3.44891	9.53037e-24
						112093999	11.1611	1.01292	3.46715	0.00682716
						21406035	1096.23	98.9854	3.4692	8.02748e-73
						21409344	7.4441	0.672675	3.47295	0.0308347
						21412215	64.46	5.74545	3.49233	5.63967e-08
						21389575	42.605	3.69414	3.5279	9.87255e-09
						21388707	462.011	39.9311	3.53233	9.89198e-60
						21405137	17390.4	1465.82	3.56851	0
						112093037	12.1415	1.00715	3.58562	0.00716992
						21397750	184.022	15.109	3.60606	7.62073e-06
						21401539	38636.2	3080.53	3.64871	8.51953e-115
						21403467	21.2586	1.66997	3.66522	0.00012315
						112090556	8.78449	0.666911	3.7139	0.0141238
						21387802	178.347	13.0852	3.76674	1.0173e-20
						112094877	4.94577	0.332432	3.77494	0.0460264
						21392644	16290.8	1185.31	3.78072	2.39783e-172
						novel.101	5.0076	0.340243	3.78984	0.0485007
						21388708	37.0967	2.67546	3.79095	3.30925e-07
						21393865	159.448	11.4597	3.80239	5.7172e-21
						21409777	1645.85	117.708	3.80534	8.47243e-63
						112092299	37.7012	2.68903	3.80733	1.0371e-06
						21400035	28.1782	2.00483	3.81047	3.57567e-05
						112094688	28.3566	2.02993	3.81295	1.40463e-05
						21396365	128.424	9.09359	3.82323	5.28588e-23
						21399622	109.9	7.70956	3.83213	2.37025e-18
						21395394	5.17366	0.334479	3.84511	0.0415337
						21385330	24.2371	1.68764	3.84987	3.27881e-05
						112093403	121.317	8.39915	3.8536	1.42755e-22
						21393819	111.836	7.70304	3.85692	7.18047e-15
						21394903	5081.72	349.878	3.86022	2.51125e-145
						112091145	39.1527	2.68122	3.86729	7.52532e-08
						21404769	884.26	57.9858	3.9296	1.62335e-113
						21395152	573.837	36.9323	3.958	2.0999e-91
						112091569	15.6756	1.01497	3.95844	0.000623941
						novel.1161	5.63543	0.334479	3.96202	0.0323844
						novel.1132	5.63992	0.334479	3.9629	0.0310976
						novel.1072	10.4665	0.664864	3.966	0.00660592
						112093574	5.66186	0.340243	3.96786	0.0354706
						112095275	26.7779	1.68188	3.9982	1.4816e-05
						novel.170	65.6739	4.029	4.02828	1.97739e-11
						21410855	1555.25	94.3273	4.04361	9.39736e-147
						21409033	72.1406	4.36105	4.0448	1.19974e-09
						21402642	11.0903	0.666911	4.04904	0.00420049
						21397253	273.966	16.4153	4.05927	6.03445e-30
						21397864	129.67	7.70509	4.07073	1.14919e-22
						112092515	40958.8	2433.38	4.07314	6.45796e-36
						21405605	68.4569	4.03104	4.08659	4.89262e-12
						112094668	41.3753	2.34712	4.13793	4.17449e-08
						21390531	894.684	49.7077	4.17056	9.00371e-128
						21408973	1071.09	58.5785	4.19216	4.16498e-19
						21388299	6.77238	0.340243	4.23408	0.016731
						112092521	6.82525	0.332432	4.24348	0.0145087
						21411635	84.0406	4.3631	4.2685	2.53026e-15
						21386143	69328.5	3544.45	4.28981	1.1628e-45
						112092011	7.06659	0.334479	4.29604	0.0164622
						21412211	179.435	9.08168	4.307	6.56129e-33
						21400531	20.1745	1.01292	4.32021	0.00010472
						21391302	26.9469	1.33959	4.32649	3.93435e-06
						novel.771	75.5539	3.71924	4.35317	2.30723e-13
						21407227	36.4226	1.67611	4.44144	2.64539e-07
						21396634	14.6348	0.666911	4.44956	0.00105222
						novel.480	4.16337	0	4.49482	0.035684
						21387966	8.13424	0.334479	4.49631	0.00687812
						21409701	869.843	38.5189	4.49663	3.88667e-23
						21385636	788.762	34.9373	4.49738	1.0427e-89
						21404680	15.2173	0.680486	4.49906	0.0024004
						112094872	4.20325	0	4.50681	0.0300708
						21408975	4.27357	0	4.52696	0.0281539
						21394864	203.426	8.70648	4.54405	1.9552e-34
						novel.543	8.43293	0.332432	4.54905	0.00649925
						21401683	8.57807	0.334479	4.56948	0.00654749
						21405256	8.73564	0.340243	4.60054	0.00537677
						novel.169	8.77056	0.340243	4.60506	0.00653434
						21387402	4.54584	0	4.61897	0.0201696
						21408771	4.56378	0	4.62358	0.0302263
						112093137	4.58124	0	4.62836	0.0204572
						21396153	427.439	16.7764	4.67149	6.28138e-47
						21400063	4.92831	0	4.73278	0.0151992
						21397266	5.18264	0	4.80864	0.0119756
						21410924	256.265	9.06644	4.82186	4.02966e-34
						21408792	10070.4	354.617	4.82756	6.6148e-251
						21392837	246.847	8.38428	4.87967	5.13522e-37
						21387489	10.646	0.334479	4.88637	0.00230449
						21384507	1172.32	39.6427	4.88711	7.00096e-171
						21408411	40.5007	1.34535	4.9149	2.81826e-08
						112093623	11.3063	0.332432	4.96612	0.0017286
						112091105	116.303	3.70604	4.97262	4.80198e-05
						21393268	5.95607	0	5.00438	0.00636853
						112092346	5.96504	0	5.00623	0.00634568
						112090408	11.8329	0.334479	5.03438	0.00107127
						112094260	6.12811	0	5.04153	0.012557
						novel.844	6.10019	0	5.04542	0.0070823
						novel.1166	12.5958	0.334479	5.12861	0.000996115
						112095180	963.928	27.4819	5.13061	1.52715e-109
						21408368	59.5986	1.67778	5.15013	2.37785e-11
						21408367	13.2246	0.340243	5.19886	0.000990665
						21410287	13.5891	0.334479	5.23775	0.000649418
						21412212	76.8335	2.03569	5.2518	9.23439e-14
						novel.638	7.06211	0	5.25658	0.00369505
						21399617	12880	332.843	5.27395	0
						21392735	3322.44	84.4416	5.29779	4.73363e-56
						21391785	15.5878	0.340243	5.43494	0.000264562
						21411924	8.19607	0	5.46709	0.0010499
						21399258	8.51671	0	5.52266	0.000856835
						21385446	17.393	0.334479	5.59054	0.000137678
						21402407	9.24578	0	5.63937	0.000633531
						21392930	137.148	2.67174	5.67475	6.32026e-22
						112094880	9.50955	0	5.68152	0.000505255
						112090573	9.54447	0	5.68589	0.000415769
						21393413	19.2919	0.340243	5.73722	8.49904e-05
						112093394	10.268	0	5.79645	0.000482964
						112091108	11.2374	0	5.91768	0.000974709
						21406626	578.978	8.73529	6.05181	1.1183e-61
						21387524	13.3388	0	6.17152	4.28238e-05
						21388949	13.3787	0	6.17514	4.17633e-05
						112093712	13.4007	0	6.17711	3.89748e-05
						112092481	13.7392	0	6.21291	4.09648e-05
						21407745	27.268	0.332432	6.23907	6.96597e-06
						21399608	497.879	6.02526	6.36761	1.3785e-09
						21398527	18.0841	0	6.60844	1.31659e-05
						novel.421	10766.5	110.078	6.61166	0
						novel.628	19.248	0	6.69622	3.52929e-06
						21412098	19.2375	0	6.6993	2.49506e-06
						21408971	2222.95	19.7893	6.81092	6.41858e-184
						112091353	24.3124	0	7.03551	9.58558e-07
						112094354	27.5169	0	7.21457	1.49785e-07
						21400198	28.5546	0	7.26756	9.92781e-08
[truncated: 9 more rows]

## Sheet: Table S4
Table S4 Gene ontology enrichment analysis of DEGs identified following submergence stress
[truncated: 187 more rows]

[truncated: 11 more sheets: Table S5, Table S6, Table S7, Table S8, Table S9, Table S10, Table S11, Table S12, Table S13, Table S14, Table S15]
